# Supplementary material for: Low Levels of IgG Recognizing the Alpha-1-Antitrypsin (A1AT) <sup>50-63</sup> Peptide and Its Association with Taiwanese Women with Primary Sj&ouml;gren's Syndrome
Source: Preprints.org preprint supplement (doi:10.20944/preprints201710.0180.v1), 2017-10-30
Supplement: Supplementary file 1 [file 0 Supplementary Table 2 20170913 1.0 protein.xlsx]

## Sheet: 工作表1
Supplementary Table 2. A list of 255 identified proteins and peptides of depleted-albumin and IgG serum protein.
	Accession	-10lgP	Coverage (%)	#Peptides	#Unique	PTM	Avg. Mass	Description
HC	P02774|VTDB_HUMAN	359.25	86	44	44	Carbamidomethylation; Oxidation (M)	52964	Vitamin D-binding protein OS=Homo sapiens GN=GC PE=1 SV=1
HC	P01009|A1AT_HUMAN	368.13	68	42	40	Carbamidomethylation; Oxidation (M)	46737	Alpha-1-antitrypsin OS=Homo sapiens GN=SERPINA1 PE=1 SV=3
HC	P04264|K2C1_HUMAN	356.19	67	53	43	Carbamidomethylation; Oxidation (M)	66039	Keratin type II cytoskeletal 1 OS=Homo sapiens GN=KRT1 PE=1 SV=6
HC	P01008|ANT3_HUMAN	335.43	66	39	39	Carbamidomethylation; Oxidation (M)	52602	Antithrombin-III OS=Homo sapiens GN=SERPINC1 PE=1 SV=1
HC	P02787|TRFE_HUMAN	369.77	65	51	51	Carbamidomethylation; Oxidation (M)	77064	Serotransferrin OS=Homo sapiens GN=TF PE=1 SV=3
HC	P35527|K1C9_HUMAN	316.98	62	33	32	Oxidation (M)	62064	Keratin type I cytoskeletal 9 OS=Homo sapiens GN=KRT9 PE=1 SV=3
HC	P13645|K1C10_HUMAN	345.99	61	35	27	Carbamidomethylation; Oxidation (M)	58827	Keratin type I cytoskeletal 10 OS=Homo sapiens GN=KRT10 PE=1 SV=6
HC	P02768|ALBU_HUMAN	374.5	84	67	67	Carbamidomethylation; Oxidation (M)	69367	Serum albumin OS=Homo sapiens GN=ALB PE=1 SV=2
HC	P35908|K22E_HUMAN	329.26	71	48	32	Carbamidomethylation; Oxidation (M)	65433	Keratin type II cytoskeletal 2 epidermal OS=Homo sapiens GN=KRT2 PE=1 SV=2
HC	P01024|CO3_HUMAN	359.88	39	56	56	Carbamidomethylation; Oxidation (M)	187147	Complement C3 OS=Homo sapiens GN=C3 PE=1 SV=2
HC	P04259|K2C6B_HUMAN	307.29	58	37	2	Carbamidomethylation; Oxidation (M)	60067	Keratin type II cytoskeletal 6B OS=Homo sapiens GN=KRT6B PE=1 SV=5
HC	P48668|K2C6C_HUMAN	315.15	58	38	0	Carbamidomethylation; Oxidation (M)	60025	Keratin type II cytoskeletal 6C OS=Homo sapiens GN=KRT6C PE=1 SV=3
HC	P02538|K2C6A_HUMAN	314.24	56	37	2	Carbamidomethylation; Oxidation (M)	60045	Keratin type II cytoskeletal 6A OS=Homo sapiens GN=KRT6A PE=1 SV=3
HC	P01023|A2MG_HUMAN	293.07	32	33	29	Carbamidomethylation; Oxidation (M)	163290	Alpha-2-macroglobulin OS=Homo sapiens GN=A2M PE=1 SV=3
HC	P01042|KNG1_HUMAN	316.85	37	29	29	Carbamidomethylation; Oxidation (M)	71957	Kininogen-1 OS=Homo sapiens GN=KNG1 PE=1 SV=2
HC	P13647|K2C5_HUMAN	300.7	47	36	19	Carbamidomethylation; Oxidation (M)	62378	Keratin type II cytoskeletal 5 OS=Homo sapiens GN=KRT5 PE=1 SV=3
HC	P0C0L5|CO4B_HUMAN	271.68	21	28	28	Carbamidomethylation; Oxidation (M)	192750	Complement C4-B OS=Homo sapiens GN=C4B PE=1 SV=2
HC	Q14624|ITIH4_HUMAN	295.86	28	26	26	Oxidation (M)	103357	Inter-alpha-trypsin inhibitor heavy chain H4 OS=Homo sapiens GN=ITIH4 PE=1 SV=4
HC	P00751|CFAB_HUMAN	262.86	32	22	22	Carbamidomethylation	85533	Complement factor B OS=Homo sapiens GN=CFB PE=1 SV=2
HC	P01011|AACT_HUMAN	306.17	45	26	26	Oxidation (M)	47651	Alpha-1-antichymotrypsin OS=Homo sapiens GN=SERPINA3 PE=1 SV=2
HC	P19013|K2C4_HUMAN	243.16	33	17	10	Oxidation (M)	57285	Keratin type II cytoskeletal 4 OS=Homo sapiens GN=KRT4 PE=1 SV=4
HC	P01857|IGHG1_HUMAN	286.65	64	18	8	Carbamidomethylation; Oxidation (M)	36106	Ig gamma-1 chain C region OS=Homo sapiens GN=IGHG1 PE=1 SV=1
HC	P02749|APOH_HUMAN	285.53	65	19	19	Carbamidomethylation	38298	Beta-2-glycoprotein 1 OS=Homo sapiens GN=APOH PE=1 SV=3
HC	P01860|IGHG3_HUMAN	273.29	52	19	9	Carbamidomethylation; Oxidation (M)	41287	Ig gamma-3 chain C region OS=Homo sapiens GN=IGHG3 PE=1 SV=2
HC	P05543|THBG_HUMAN	247.46	46	17	17	Oxidation (M)	46325	Thyroxine-binding globulin OS=Homo sapiens GN=SERPINA7 PE=1 SV=2
HC	P29622|KAIN_HUMAN	254.99	41	17	17	Carbamidomethylation; Oxidation (M)	48542	Kallistatin OS=Homo sapiens GN=SERPINA4 PE=1 SV=3
HC	P02790|HEMO_HUMAN	225.79	44	19	19	Carbamidomethylation; Oxidation (M)	51676	Hemopexin OS=Homo sapiens GN=HPX PE=1 SV=2
HC	P02647|APOA1_HUMAN	236.52	65	16	16	Oxidation (M)	30778	Apolipoprotein A-I OS=Homo sapiens GN=APOA1 PE=1 SV=1
HC	P19823|ITIH2_HUMAN	236.98	18	15	15	Oxidation (M)	106463	Inter-alpha-trypsin inhibitor heavy chain H2 OS=Homo sapiens GN=ITIH2 PE=1 SV=2
HC	P04745|AMY1_HUMAN	225.16	38	15	15	Oxidation (M)	57768	Alpha-amylase 1 OS=Homo sapiens GN=AMY1A PE=1 SV=2
HC	P00736|C1R_HUMAN	222.29	33	14	14	Carbamidomethylation; Oxidation (M)	80119	Complement C1r subcomponent OS=Homo sapiens GN=C1R PE=1 SV=2
HC	P13646|K1C13_HUMAN	207.28	35	19	9	Oxidation (M)	49588	Keratin type I cytoskeletal 13 OS=Homo sapiens GN=KRT13 PE=1 SV=4
HC	P01876|IGHA1_HUMAN	273.66	55	18	7	Carbamidomethylation; Oxidation (M)	37655	Ig alpha-1 chain C region OS=Homo sapiens GN=IGHA1 PE=1 SV=2
HC	P01861|IGHG4_HUMAN	250.14	60	16	9	Carbamidomethylation; Oxidation (M)	35941	Ig gamma-4 chain C region OS=Homo sapiens GN=IGHG4 PE=1 SV=1
HC	P08185|CBG_HUMAN	229.22	47	14	14	Carbamidomethylation; Oxidation (M)	45141	Corticosteroid-binding globulin OS=Homo sapiens GN=SERPINA6 PE=1 SV=1
HC	P01871|IGHM_HUMAN	213.99	29	11	11	Carbamidomethylation; Oxidation (M)	49307	Ig mu chain C region OS=Homo sapiens GN=IGHM PE=1 SV=3
HC	P02765|FETUA_HUMAN	243.01	49	15	15	Carbamidomethylation; Oxidation (M)	39325	Alpha-2-HS-glycoprotein OS=Homo sapiens GN=AHSG PE=1 SV=1
HC	P02533|K1C14_HUMAN	224.48	32	16	7	Oxidation (M)	51562	Keratin type I cytoskeletal 14 OS=Homo sapiens GN=KRT14 PE=1 SV=4
HC	P01859|IGHG2_HUMAN	237.22	50	16	5	Carbamidomethylation; Oxidation (M)	35901	Ig gamma-2 chain C region OS=Homo sapiens GN=IGHG2 PE=1 SV=2
HC	P01877|IGHA2_HUMAN	254.83	51	14	3	Carbamidomethylation; Oxidation (M)	36526	Ig alpha-2 chain C region OS=Homo sapiens GN=IGHA2 PE=1 SV=3
HC	O95678|K2C75_HUMAN	215.17	21	16	1	Carbamidomethylation; Oxidation (M)	59560	Keratin type II cytoskeletal 75 OS=Homo sapiens GN=KRT75 PE=1 SV=2
HC	P04004|VTNC_HUMAN	215.69	24	13	13	Carbamidomethylation; Oxidation (M)	54306	Vitronectin OS=Homo sapiens GN=VTN PE=1 SV=1
HC	P00450|CERU_HUMAN	177.15	14	10	10	Carbamidomethylation; Oxidation (M)	122205	Ceruloplasmin OS=Homo sapiens GN=CP PE=1 SV=1
HC	Q96IY4|CBPB2_HUMAN	183.04	27	11	11	Carbamidomethylation; Oxidation (M)	48424	Carboxypeptidase B2 OS=Homo sapiens GN=CPB2 PE=1 SV=2
HC	P01019|ANGT_HUMAN	241.98	30	13	13	Oxidation (M)	53154	Angiotensinogen OS=Homo sapiens GN=AGT PE=1 SV=1
HC	P08697|A2AP_HUMAN	183.22	32	12	12	Carbamidomethylation; Oxidation (M)	54566	Alpha-2-antiplasmin OS=Homo sapiens GN=SERPINF2 PE=1 SV=3
HC	P00738|HPT_HUMAN	166.96	27	10	10	Carbamidomethylation; Oxidation (M)	45205	Haptoglobin OS=Homo sapiens GN=HP PE=1 SV=1
HC	P12035|K2C3_HUMAN	200.11	14	16	0	Oxidation (M)	64417	Keratin type II cytoskeletal 3 OS=Homo sapiens GN=KRT3 PE=1 SV=3
HC	P05546|HEP2_HUMAN	165.53	23	9	9	Oxidation (M)	57071	Heparin cofactor 2 OS=Homo sapiens GN=SERPIND1 PE=1 SV=3
HC	P19012|K1C15_HUMAN	175.66	18	11	1		49212	Keratin type I cytoskeletal 15 OS=Homo sapiens GN=KRT15 PE=1 SV=3
HC	P08779|K1C16_HUMAN	192.07	21	12	4	Oxidation (M)	51268	Keratin type I cytoskeletal 16 OS=Homo sapiens GN=KRT16 PE=1 SV=4
HC	P05156|CFAI_HUMAN	176.89	17	9	9	Carbamidomethylation	65750	Complement factor I OS=Homo sapiens GN=CFI PE=1 SV=2
HC	P08571|CD14_HUMAN	177.56	27	7	7	Carbamidomethylation; Oxidation (M)	40076	Monocyte differentiation antigen CD14 OS=Homo sapiens GN=CD14 PE=1 SV=2
HC	Q01546|K22O_HUMAN	186.81	12	14	1	Carbamidomethylation; Oxidation (M)	65841	Keratin type II cytoskeletal 2 oral OS=Homo sapiens GN=KRT76 PE=1 SV=2
HC	P27918|PROP_HUMAN	161.99	22	7	7	Carbamidomethylation; Oxidation (M)	51276	Properdin OS=Homo sapiens GN=CFP PE=1 SV=2
HC	Q5XKE5|K2C79_HUMAN	178.74	13	10	0	Oxidation (M)	57836	Keratin type II cytoskeletal 79 OS=Homo sapiens GN=KRT79 PE=1 SV=2
HC	Q9UGM5|FETUB_HUMAN	159.09	20	7	7	Carbamidomethylation; Oxidation (M)	42055	Fetuin-B OS=Homo sapiens GN=FETUB PE=1 SV=2
HC	P04196|HRG_HUMAN	198.21	17	9	9	Carbamidomethylation	59578	Histidine-rich glycoprotein OS=Homo sapiens GN=HRG PE=1 SV=1
HC	P04114|APOB_HUMAN	141.76	1	6	6		515611	Apolipoprotein B-100 OS=Homo sapiens GN=APOB PE=1 SV=2
HC	P01781|HV320_HUMAN	157.85	50	7	6	Carbamidomethylation; Oxidation (M)	12730	Ig heavy chain V-III region GAL OS=Homo sapiens PE=1 SV=1
HC	Q86Y46|K2C73_HUMAN	178.74	11	8	1	Carbamidomethylation	58923	Keratin type II cytoskeletal 73 OS=Homo sapiens GN=KRT73 PE=1 SV=1
HC	P05787|K2C8_HUMAN	167.51	10	8	0	Oxidation (M)	53704	Keratin type II cytoskeletal 8 OS=Homo sapiens GN=KRT8 PE=1 SV=7
HC	P01834|IGKC_HUMAN	183.62	80	5	5	Carbamidomethylation	11609	Ig kappa chain C region OS=Homo sapiens GN=IGKC PE=1 SV=1
HC	P20742|PZP_HUMAN	141.85	4	5	1	Oxidation (M)	163862	Pregnancy zone protein OS=Homo sapiens GN=PZP PE=1 SV=4
HC	Q86YZ3|HORN_HUMAN	93.84	2	4	4		282389	Hornerin OS=Homo sapiens GN=HRNR PE=1 SV=2
HC	Q9UHG3|PCYOX_HUMAN	149.5	20	6	6	Oxidation (M)	56640	Prenylcysteine oxidase 1 OS=Homo sapiens GN=PCYOX1 PE=1 SV=3
HC	P08727|K1C19_HUMAN	128.41	11	5	0	Oxidation (M)	44106	Keratin type I cytoskeletal 19 OS=Homo sapiens GN=KRT19 PE=1 SV=4
HC	P51884|LUM_HUMAN	136.82	16	4	4		38429	Lumican OS=Homo sapiens GN=LUM PE=1 SV=2
HC	Q7Z3Y7|K1C28_HUMAN	129.15	9	5	1	Oxidation (M)	50567	Keratin type I cytoskeletal 28 OS=Homo sapiens GN=KRT28 PE=1 SV=2
HC	P01765|HV304_HUMAN	164.94	36	5	2	Carbamidomethylation	12356	Ig heavy chain V-III region TIL OS=Homo sapiens PE=1 SV=1
HC	Q8N1N4|K2C78_HUMAN	139.76	8	5	1	Carbamidomethylation	56866	Keratin type II cytoskeletal 78 OS=Homo sapiens GN=KRT78 PE=2 SV=2
HC	P61626|LYSC_HUMAN	133.37	26	4	4		16537	Lysozyme C OS=Homo sapiens GN=LYZ PE=1 SV=1
HC	P04180|LCAT_HUMAN	85.02	14	4	4	Oxidation (M)	49578	Phosphatidylcholine-sterol acyltransferase OS=Homo sapiens GN=LCAT PE=1 SV=1
HC	P08729|K2C7_HUMAN	129.82	7	5	0		51386	Keratin type II cytoskeletal 7 OS=Homo sapiens GN=KRT7 PE=1 SV=5
HC	Q9Y6R7|FCGBP_HUMAN	91.92	1	3	3	Carbamidomethylation	572021	IgGFc-binding protein OS=Homo sapiens GN=FCGBP PE=1 SV=3
HC	Q14CN4|K2C72_HUMAN	129.17	7	4	0	Oxidation (M)	55877	Keratin type II cytoskeletal 72 OS=Homo sapiens GN=KRT72 PE=1 SV=2
HC	Q3SY84|K2C71_HUMAN	140.76	8	5	0		57292	Keratin type II cytoskeletal 71 OS=Homo sapiens GN=KRT71 PE=1 SV=3
HC	P01766|HV305_HUMAN	150.44	34	4	1	Carbamidomethylation	13227	Ig heavy chain V-III region BRO OS=Homo sapiens PE=1 SV=1
HC	P49908|SEPP1_HUMAN	141	10	5	5	Oxidation (M)	43174	Selenoprotein P OS=Homo sapiens GN=SEPP1 PE=1 SV=3
HC	P01763|HV302_HUMAN	112.56	42	4	2	Carbamidomethylation; Oxidation (M)	12256	Ig heavy chain V-III region WEA OS=Homo sapiens PE=1 SV=1
HC	Q7Z794|K2C1B_HUMAN	194.3	11	8	3	Oxidation (M)	61901	Keratin type II cytoskeletal 1b OS=Homo sapiens GN=KRT77 PE=2 SV=3
HC	Q02413|DSG1_HUMAN	94.56	5	3	3	Oxidation (M)	113748	Desmoglein-1 OS=Homo sapiens GN=DSG1 PE=1 SV=2
HC	P0CG05|LAC2_HUMAN	132.9	38	3	3	Carbamidomethylation	11294	Ig lambda-2 chain C regions OS=Homo sapiens GN=IGLC2 PE=1 SV=1
HC	P0CG06|LAC3_HUMAN	132.9	38	3	3	Carbamidomethylation	11237	Ig lambda-3 chain C regions OS=Homo sapiens GN=IGLC3 PE=1 SV=1
HC	P68871|HBB_HUMAN	113.79	28	3	3	Oxidation (M)	15998	Hemoglobin subunit beta OS=Homo sapiens GN=HBB PE=1 SV=2
HC	P36955|PEDF_HUMAN	90.36	8	3	3		46312	Pigment epithelium-derived factor OS=Homo sapiens GN=SERPINF1 PE=1 SV=4
HC	Q96DA0|ZG16B_HUMAN	101.92	19	3	3		22739	Zymogen granule protein 16 homolog B OS=Homo sapiens GN=ZG16B PE=1 SV=3
HC	P01767|HV306_HUMAN	117.05	32	3	1	Carbamidomethylation	12379	Ig heavy chain V-III region BUT OS=Homo sapiens PE=1 SV=1
HC	P01764|HV303_HUMAN	125.25	25	3	1	Carbamidomethylation	12582	Ig heavy chain V-III region VH26 OS=Homo sapiens PE=1 SV=1
HC	P00742|FA10_HUMAN	95.15	7	3	3	Carbamidomethylation	54732	Coagulation factor X OS=Homo sapiens GN=F10 PE=1 SV=2
HC	P04040|CATA_HUMAN	119.6	9	3	3		59756	Catalase OS=Homo sapiens GN=CAT PE=1 SV=3
HC	P01779|HV318_HUMAN	143.09	48	4	2	Carbamidomethylation	12431	Ig heavy chain V-III region TUR OS=Homo sapiens PE=1 SV=1
HC	Q7Z3Y8|K1C27_HUMAN	107.71	8	4	2	Oxidation (M)	49822	Keratin type I cytoskeletal 27 OS=Homo sapiens GN=KRT27 PE=1 SV=2
HC	P09871|C1S_HUMAN	89.72	7	4	4		76685	Complement C1s subcomponent OS=Homo sapiens GN=C1S PE=1 SV=1
HC	Q6KB66|K2C80_HUMAN	91.31	9	3	2	Carbamidomethylation	50525	Keratin type II cytoskeletal 80 OS=Homo sapiens GN=KRT80 PE=1 SV=2
HC	P15924|DESP_HUMAN	41.96	1	2	2	Oxidation (M)	331774	Desmoplakin OS=Homo sapiens GN=DSP PE=1 SV=3
HC	P20848|A1ATR_HUMAN	60.22	3	2	1	Oxidation (M)	47891	Putative alpha-1-antitrypsin-related protein OS=Homo sapiens GN=SERPINA2P PE=1 SV=1
HC	P04083|ANXA1_HUMAN	81.97	7	2	2		38714	Annexin A1 OS=Homo sapiens GN=ANXA1 PE=1 SV=2
HC	P01780|HV319_HUMAN	69.97	24	2	1		12563	Ig heavy chain V-III region JON OS=Homo sapiens PE=1 SV=1
HC	Q09666|AHNK_HUMAN	41.47	1	3	3	Oxidation (M)	629114	Neuroblast differentiation-associated protein AHNAK OS=Homo sapiens GN=AHNAK PE=1 SV=2
HC	P20930|FILA_HUMAN	38.6	0	1	1		435180	Filaggrin OS=Homo sapiens GN=FLG PE=1 SV=3
HC	P03952|KLKB1_HUMAN	73.4	2	1	1		71370	Plasma kallikrein OS=Homo sapiens GN=KLKB1 PE=1 SV=1
HC	P78386|KRT85_HUMAN	61.33	5	3	1	Carbamidomethylation	55802	Keratin type II cuticular Hb5 OS=Homo sapiens GN=KRT85 PE=1 SV=1
HC	P02788|TRFL_HUMAN	50	1	1	1		78182	Lactotransferrin OS=Homo sapiens GN=LTF PE=1 SV=6
HC	P06396|GELS_HUMAN	104.21	4	2	2		85697	Gelsolin OS=Homo sapiens GN=GSN PE=1 SV=1
HC	P06331|HV209_HUMAN	121.42	18	3	2	Carbamidomethylation	16228	Ig heavy chain V-II region ARH-77 OS=Homo sapiens PE=4 SV=1
HC	Q96PD5|PGRP2_HUMAN	92.42	5	2	2	Carbamidomethylation	62217	N-acetylmuramoyl-L-alanine amidase OS=Homo sapiens GN=PGLYRP2 PE=1 SV=1
HC	P10909|CLUS_HUMAN	85.73	5	3	3		52495	Clusterin OS=Homo sapiens GN=CLU PE=1 SV=1
HC	P01825|HV207_HUMAN	98.35	19	2	1	Carbamidomethylation	12790	Ig heavy chain V-II region NEWM OS=Homo sapiens PE=1 SV=1
HC	P49454|CENPF_HUMAN	43.47	0	1	1		367765	Centromere protein F OS=Homo sapiens GN=CENPF PE=1 SV=2
HC	P19827|ITIH1_HUMAN	56.67	3	2	2		101389	Inter-alpha-trypsin inhibitor heavy chain H1 OS=Homo sapiens GN=ITIH1 PE=1 SV=3
HC	P01040|CYTA_HUMAN	98.24	27	2	2		11006	Cystatin-A OS=Homo sapiens GN=CSTA PE=1 SV=1
HC	P25705|ATPA_HUMAN	71.99	6	2	2		59751	ATP synthase subunit alpha mitochondrial OS=Homo sapiens GN=ATP5A1 PE=1 SV=1
HC	O43866|CD5L_HUMAN	58.12	6	1	1	Carbamidomethylation	38088	CD5 antigen-like OS=Homo sapiens GN=CD5L PE=1 SV=1
HC	Q8WZ42|TITIN_HUMAN	52.54	0	7	7	Carbamidomethylation; Oxidation (M)	3815922	Titin OS=Homo sapiens GN=TTN PE=1 SV=4
HC	P04003|C4BPA_HUMAN	87.84	5	2	2	Carbamidomethylation	67033	C4b-binding protein alpha chain OS=Homo sapiens GN=C4BPA PE=1 SV=2
HC	P12955|PEPD_HUMAN	78.5	4	2	2		54548	Xaa-Pro dipeptidase OS=Homo sapiens GN=PEPD PE=1 SV=3
HC	Q8TD26|CHD6_HUMAN	34.93	0	1	1		305412	Chromodomain-helicase-DNA-binding protein 6 OS=Homo sapiens GN=CHD6 PE=1 SV=4
HC	Q8TF62|AT8B4_HUMAN	28.33	1	1	1		135868	Probable phospholipid-transporting ATPase IM OS=Homo sapiens GN=ATP8B4 PE=2 SV=3
HC	O60832|DKC1_HUMAN	25.76	2	1	1		57674	H/ACA ribonucleoprotein complex subunit 4 OS=Homo sapiens GN=DKC1 PE=1 SV=3
HC	Q5D862|FILA2_HUMAN	62.34	0	1	1		248072	Filaggrin-2 OS=Homo sapiens GN=FLG2 PE=1 SV=1
HC	Q8NF91|SYNE1_HUMAN	28.34	0	2	2		1011108	Nesprin-1 OS=Homo sapiens GN=SYNE1 PE=1 SV=4
HC	P12036|NFH_HUMAN	85.81	2	3	1	Carbamidomethylation	112479	Neurofilament heavy polypeptide OS=Homo sapiens GN=NEFH PE=1 SV=4
HC	P01771|HV310_HUMAN	52.29	15	2	1	Carbamidomethylation	13566	Ig heavy chain V-III region HIL OS=Homo sapiens PE=1 SV=1
HC	P05783|K1C18_HUMAN	61.86	4	2	1		48058	Keratin type I cytoskeletal 18 OS=Homo sapiens GN=KRT18 PE=1 SV=2
HC	Q96L96|ALPK3_HUMAN	28.31	1	2	2		201270	Alpha-protein kinase 3 OS=Homo sapiens GN=ALPK3 PE=2 SV=2
HC	Q8WXH0|SYNE2_HUMAN	33.8	0	2	2		796457	Nesprin-2 OS=Homo sapiens GN=SYNE2 PE=1 SV=3
HC	Q8TDY2|RBCC1_HUMAN	28.77	1	1	1		183090	RB1-inducible coiled-coil protein 1 OS=Homo sapiens GN=RB1CC1 PE=1 SV=3
HC	O43790|KRT86_HUMAN	61.33	5	3	1	Carbamidomethylation	53501	Keratin type II cuticular Hb6 OS=Homo sapiens GN=KRT86 PE=1 SV=1
HC	O14556|G3PT_HUMAN	47.26	6	2	2	Oxidation (M)	44501	Glyceraldehyde-3-phosphate dehydrogenase testis-specific OS=Homo sapiens GN=GAPDHS PE=1 SV=2
HC	P80419|HV322_HUMAN	31.93	9	1	1	Carbamidomethylation	13087	Ig heavy chain V-III region GAR OS=Homo sapiens PE=1 SV=1
HC	Q7Z5N4|SDK1_HUMAN	26.6	1	1	1		242109	Protein sidekick-1 OS=Homo sapiens GN=SDK1 PE=1 SV=3
HC	P05997|CO5A2_HUMAN	20.47	1	1	1		144910	Collagen alpha-2(V) chain OS=Homo sapiens GN=COL5A2 PE=1 SV=3
HC	Q8TDW7|FAT3_HUMAN	27	0	1	1		505527	Protocadherin Fat 3 OS=Homo sapiens GN=FAT3 PE=2 SV=2
HC	Q13332|PTPRS_HUMAN	21.06	1	1	1		217039	Receptor-type tyrosine-protein phosphatase S OS=Homo sapiens GN=PTPRS PE=1 SV=3
HC	Q9UK55|ZPI_HUMAN	72.68	4	1	1		50707	Protein Z-dependent protease inhibitor OS=Homo sapiens GN=SERPINA10 PE=1 SV=1
HC	Q96RL7|VP13A_HUMAN	20.93	0	1	1		360277	Vacuolar protein sorting-associated protein 13A OS=Homo sapiens GN=VPS13A PE=1 SV=2
HC	P62987|RL40_HUMAN	68.03	12	1	1		14728	Ubiquitin-60S ribosomal protein L40 OS=Homo sapiens GN=UBA52 PE=1 SV=2
HC	P62979|RS27A_HUMAN	68.03	10	1	1		17965	Ubiquitin-40S ribosomal protein S27a OS=Homo sapiens GN=RPS27A PE=1 SV=2
HC	P0CG47|UBB_HUMAN	68.03	7	1	1		25762	Polyubiquitin-B OS=Homo sapiens GN=UBB PE=1 SV=1
HC	P0CG48|UBC_HUMAN	68.03	2	1	1		77039	Polyubiquitin-C OS=Homo sapiens GN=UBC PE=1 SV=3
HC	P01743|HV102_HUMAN	77.32	9	1	1	Carbamidomethylation	12946	Ig heavy chain V-I region HG3 OS=Homo sapiens PE=4 SV=1
HC	P02760|AMBP_HUMAN	66.66	3	1	1		39000	Protein AMBP OS=Homo sapiens GN=AMBP PE=1 SV=1
HC	P23083|HV103_HUMAN	68.77	10	1	1	Oxidation (M)	13009	Ig heavy chain V-I region V35 OS=Homo sapiens PE=1 SV=1
HC	P31151|S10A7_HUMAN	62.25	11	1	1		11471	Protein S100-A7 OS=Homo sapiens GN=S100A7 PE=1 SV=4
HC	Q6UWP8|SBSN_HUMAN	65.42	3	1	1		60541	Suprabasin OS=Homo sapiens GN=SBSN PE=2 SV=2
HC	P06744|G6PI_HUMAN	57.49	3	1	1	Oxidation (M)	63147	Glucose-6-phosphate isomerase OS=Homo sapiens GN=GPI PE=1 SV=4
HC	P04080|CYTB_HUMAN	53.68	12	1	1		11140	Cystatin-B OS=Homo sapiens GN=CSTB PE=1 SV=2
HC	P12273|PIP_HUMAN	57.39	7	1	1		16572	Prolactin-inducible protein OS=Homo sapiens GN=PIP PE=1 SV=1
HC	P81605|DCD_HUMAN	54.78	10	1	1		11284	Dermcidin OS=Homo sapiens GN=DCD PE=1 SV=2
HC	Q9NZT1|CALL5_HUMAN	55.5	16	1	1		15893	Calmodulin-like protein 5 OS=Homo sapiens GN=CALML5 PE=1 SV=2
HC	P60709|ACTB_HUMAN	57.13	3	1	1		41737	Actin cytoplasmic 1 OS=Homo sapiens GN=ACTB PE=1 SV=1
HC	P63261|ACTG_HUMAN	57.13	3	1	1		41793	Actin cytoplasmic 2 OS=Homo sapiens GN=ACTG1 PE=1 SV=1
HC	P01591|IGJ_HUMAN	52.38	8	1	1		18099	Immunoglobulin J chain OS=Homo sapiens GN=IGJ PE=1 SV=4
HC	P35858|ALS_HUMAN	50.51	3	1	1		66035	Insulin-like growth factor-binding protein complex acid labile subunit OS=Homo sapiens GN=IGFALS PE=1 SV=1
HC	Q96KN2|CNDP1_HUMAN	46.08	2	1	1		56706	Beta-Ala-His dipeptidase OS=Homo sapiens GN=CNDP1 PE=1 SV=4
HC	P02649|APOE_HUMAN	43.68	3	1	1		36154	Apolipoprotein E OS=Homo sapiens GN=APOE PE=1 SV=1
HC	P01824|HV206_HUMAN	48.2	6	1	1		14117	Ig heavy chain V-II region WAH OS=Homo sapiens PE=1 SV=1
HC	P40926|MDHM_HUMAN	41.88	3	1	1		35503	Malate dehydrogenase mitochondrial OS=Homo sapiens GN=MDH2 PE=1 SV=3
HC	P98160|PGBM_HUMAN	27.4	0	1	1	Carbamidomethylation	468835	Basement membrane-specific heparan sulfate proteoglycan core protein OS=Homo sapiens GN=HSPG2 PE=1 SV=4
HC	Q12805|FBLN3_HUMAN	39.37	2	1	1	Carbamidomethylation	54641	EGF-containing fibulin-like extracellular matrix protein 1 OS=Homo sapiens GN=EFEMP1 PE=1 SV=2
HC	P23229|ITA6_HUMAN	23.72	1	1	1		126605	Integrin alpha-6 OS=Homo sapiens GN=ITGA6 PE=1 SV=5
HC	O94804|STK10_HUMAN	30.85	1	1	1		112135	Serine/threonine-protein kinase 10 OS=Homo sapiens GN=STK10 PE=1 SV=1
HC	Q99250|SCN2A_HUMAN	33.33	0	1	1		227973	Sodium channel protein type 2 subunit alpha OS=Homo sapiens GN=SCN2A PE=1 SV=3
HC	Q8IVG5|SAM9L_HUMAN	22.46	1	1	1		184531	Sterile alpha motif domain-containing protein 9-like OS=Homo sapiens GN=SAMD9L PE=1 SV=2
HC	Q8IVL0|NAV3_HUMAN	31.1	1	1	1		255646	Neuron navigator 3 OS=Homo sapiens GN=NAV3 PE=1 SV=3
HC	Q5TZA2|CROCC_HUMAN	37.6	1	2	2		228521	Rootletin OS=Homo sapiens GN=CROCC PE=1 SV=1
HC	P06733|ENOA_HUMAN	30.56	1	1	1		47169	Alpha-enolase OS=Homo sapiens GN=ENO1 PE=1 SV=2
HC	A6NJ16|IV4F8_HUMAN	30.71	5	1	1		13585	Putative V-set and immunoglobulin domain-containing-like protein IGHV4OR15-8 OS=Homo sapiens GN=IGHV4OR15-8 PE=5 SV=2
HC	P20908|CO5A1_HUMAN	24.15	1	2	1		183559	Collagen alpha-1(V) chain OS=Homo sapiens GN=COL5A1 PE=1 SV=3
HC	Q15058|KIF14_HUMAN	34.77	1	2	2	Oxidation (M)	186490	Kinesin-like protein KIF14 OS=Homo sapiens GN=KIF14 PE=1 SV=1
HC	Q8TEL6|TP4AP_HUMAN	26.6	2	1	1		90852	Short transient receptor potential channel 4-associated protein OS=Homo sapiens GN=TRPC4AP PE=1 SV=2
HC	P17174|AATC_HUMAN	28.32	2	1	1		46248	Aspartate aminotransferase cytoplasmic OS=Homo sapiens GN=GOT1 PE=1 SV=3
HC	Q9NWZ3|IRAK4_HUMAN	36.23	6	2	2	Carbamidomethylation; Oxidation (M)	51530	Interleukin-1 receptor-associated kinase 4 OS=Homo sapiens GN=IRAK4 PE=1 SV=1
HC	O60423|AT8B3_HUMAN	28.33	1	1	1		146752	Probable phospholipid-transporting ATPase IK OS=Homo sapiens GN=ATP8B3 PE=2 SV=4
HC	Q5VST9|OBSCN_HUMAN	53.17	0	2	1		868496	Obscurin OS=Homo sapiens GN=OBSCN PE=1 SV=3
HC	Q9NWH9|SLTM_HUMAN	32.04	1	1	1		117149	SAFB-like transcription modulator OS=Homo sapiens GN=SLTM PE=1 SV=2
HC	Q96NZ8|WFKN1_HUMAN	27.95	2	1	1		58798	WAP Kazal immunoglobulin Kunitz and NTR domain-containing protein 1 OS=Homo sapiens GN=WFIKKN1 PE=1 SV=1
HC	A6NIK2|LR10B_HUMAN	28.48	3	1	1		32714	Leucine-rich repeat-containing protein 10B OS=Homo sapiens GN=LRRC10B PE=4 SV=2
HC	Q8TF72|SHRM3_HUMAN	23.92	0	1	1		216856	Protein Shroom3 OS=Homo sapiens GN=SHROOM3 PE=1 SV=2
HC	Q9UPR0|PLCL2_HUMAN	30.6	1	1	1		125866	Inactive phospholipase C-like protein 2 OS=Homo sapiens GN=PLCL2 PE=1 SV=2
HC	Q9P2E9|RRBP1_HUMAN	23.88	0	1	1		152472	Ribosome-binding protein 1 OS=Homo sapiens GN=RRBP1 PE=1 SV=4
HC	Q7Z6J4|FGD2_HUMAN	27.93	1	1	1	Oxidation (M)	74892	FYVE RhoGEF and PH domain-containing protein 2 OS=Homo sapiens GN=FGD2 PE=2 SV=1
HC	Q14789|GOGB1_HUMAN	24.42	0	2	2		376019	Golgin subfamily B member 1 OS=Homo sapiens GN=GOLGB1 PE=1 SV=2
HC	Q9NTI2|AT8A2_HUMAN	28.33	1	1	1		129241	Probable phospholipid-transporting ATPase IB OS=Homo sapiens GN=ATP8A2 PE=1 SV=2
HC	Q9NTG1|PKDRE_HUMAN	23.35	0	1	1		255447	Polycystic kidney disease and receptor for egg jelly-related protein OS=Homo sapiens GN=PKDREJ PE=2 SV=2
HC	Q5VU97|CAHD1_HUMAN	26.15	1	1	1		142289	VWFA and cache domain-containing protein 1 OS=Homo sapiens GN=CACHD1 PE=2 SV=2
HC	Q68DL7|CR063_HUMAN	28.83	1	1	1		77231	Uncharacterized protein C18orf63 OS=Homo sapiens GN=C18orf63 PE=2 SV=2
HC	Q96NW7|LRRC7_HUMAN	21.99	1	1	1		172580	Leucine-rich repeat-containing protein 7 OS=Homo sapiens GN=LRRC7 PE=1 SV=1
HC	Q96I13|ABHD8_HUMAN	28.5	4	1	1		47331	Abhydrolase domain-containing protein 8 OS=Homo sapiens GN=ABHD8 PE=2 SV=1
HC	P33176|KINH_HUMAN	20.15	1	1	1	Carbamidomethylation	109685	Kinesin-1 heavy chain OS=Homo sapiens GN=KIF5B PE=1 SV=1
HC	Q12840|KIF5A_HUMAN	20.15	1	1	1	Carbamidomethylation	117378	Kinesin heavy chain isoform 5A OS=Homo sapiens GN=KIF5A PE=1 SV=2
HC	Q9HAU5|RENT2_HUMAN	25.68	2	2	2	Carbamidomethylation	147810	Regulator of nonsense transcripts 2 OS=Homo sapiens GN=UPF2 PE=1 SV=1
HC	Q96HN2|SAHH3_HUMAN	22.59	2	1	1	Oxidation (M)	66721	Putative adenosylhomocysteinase 3 OS=Homo sapiens GN=AHCYL2 PE=1 SV=1
HC	Q12955|ANK3_HUMAN	23.95	0	1	1		480416	Ankyrin-3 OS=Homo sapiens GN=ANK3 PE=1 SV=3
HC	A8MWA6|F90AM_HUMAN	23.54	3	1	1		49874	Putative protein FAM90A22P OS=Homo sapiens GN=FAM90A22P PE=5 SV=1
HC	A6NKC0|F90A7_HUMAN	23.54	3	1	1		49804	Putative protein FAM90A7P OS=Homo sapiens GN=FAM90A7P PE=5 SV=1
HC	A8MXZ1|F90AN_HUMAN	23.54	3	1	1		49910	Putative protein FAM90A23P OS=Homo sapiens GN=FAM90A23P PE=5 SV=1
HC	A8MX19|F90AC_HUMAN	23.54	3	1	1		49786	Putative protein FAM90A12P OS=Homo sapiens GN=FAM90A12P PE=5 SV=1
HC	Q9UPN3|MACF1_HUMAN	22.78	0	1	1		838323	Microtubule-actin cross-linking factor 1 isoforms 1/2/3/5 OS=Homo sapiens GN=MACF1 PE=1 SV=4
HC	Q96T76|MMS19_HUMAN	29.79	2	2	2		113289	MMS19 nucleotide excision repair protein homolog OS=Homo sapiens GN=MMS19 PE=1 SV=2
HC	Q8NEM0|MCPH1_HUMAN	20.03	1	1	1		92877	Microcephalin OS=Homo sapiens GN=MCPH1 PE=1 SV=3
HC	Q9UBZ9|REV1_HUMAN	21.35	1	1	1		138248	DNA repair protein REV1 OS=Homo sapiens GN=REV1 PE=1 SV=1
HC	P0DJD0|RGPD1_HUMAN	25.12	1	2	2		196661	RANBP2-like and GRIP domain-containing protein 1 OS=Homo sapiens GN=RGPD1 PE=2 SV=1
HC	P0DJD1|RGPD2_HUMAN	25.12	1	2	2		197306	RANBP2-like and GRIP domain-containing protein 2 OS=Homo sapiens GN=RGPD2 PE=2 SV=1
HC	O15078|CE290_HUMAN	20.89	0	1	1		290384	Centrosomal protein of 290 kDa OS=Homo sapiens GN=CEP290 PE=1 SV=2
HC	Q9Y6W3|CAN7_HUMAN	28.82	1	1	1		92652	Calpain-7 OS=Homo sapiens GN=CAPN7 PE=1 SV=1
HC	Q9UHB7|AFF4_HUMAN	28.62	2	2	2		127459	AF4/FMR2 family member 4 OS=Homo sapiens GN=AFF4 PE=1 SV=1
HC	Q5VYK3|ECM29_HUMAN	25.87	1	1	1	Oxidation (M)	204289	Proteasome-associated protein ECM29 homolog OS=Homo sapiens GN=ECM29 PE=1 SV=2
HC	Q9HB96|FANCE_HUMAN	26.14	2	1	1		58711	Fanconi anemia group E protein OS=Homo sapiens GN=FANCE PE=1 SV=1
HC	Q92817|EVPL_HUMAN	23.24	0	1	1		231602	Envoplakin OS=Homo sapiens GN=EVPL PE=1 SV=3
HC	Q9P2B7|K1430_HUMAN	24.84	2	1	1		59475	UPF0501 protein KIAA1430 OS=Homo sapiens GN=KIAA1430 PE=1 SV=2
HC	P31327|CPSM_HUMAN	28.46	1	1	1		164939	Carbamoyl-phosphate synthase [ammonia] mitochondrial OS=Homo sapiens GN=CPS1 PE=1 SV=2
HC	O75443|TECTA_HUMAN	21.72	0	1	1		239526	Alpha-tectorin OS=Homo sapiens GN=TECTA PE=1 SV=3
HC	Q13085|ACACA_HUMAN	23.38	0	1	1		265551	Acetyl-CoA carboxylase 1 OS=Homo sapiens GN=ACACA PE=1 SV=2
HC	Q8NCH0|CHSTE_HUMAN	22.65	3	1	1		42997	Carbohydrate sulfotransferase 14 OS=Homo sapiens GN=CHST14 PE=1 SV=2
HC	O15439|MRP4_HUMAN	26.08	1	1	1	Oxidation (M)	149526	Multidrug resistance-associated protein 4 OS=Homo sapiens GN=ABCC4 PE=1 SV=3
HC	Q8N9V7|TOPZ1_HUMAN	21.33	1	1	1		190926	Testis- and ovary-specific PAZ domain-containing protein 1 OS=Homo sapiens GN=TOPAZ1 PE=2 SV=3
HC	Q70CQ4|UBP31_HUMAN	21.09	1	1	1		146651	Ubiquitin carboxyl-terminal hydrolase 31 OS=Homo sapiens GN=USP31 PE=2 SV=2
HC	Q9UNH7|SNX6_HUMAN	23.92	3	1	1		46649	Sorting nexin-6 OS=Homo sapiens GN=SNX6 PE=1 SV=1
HC	O60494|CUBN_HUMAN	23.35	0	1	1		398738	Cubilin OS=Homo sapiens GN=CUBN PE=1 SV=5
HC	P25100|ADA1D_HUMAN	22.35	3	1	1		60463	Alpha-1D adrenergic receptor OS=Homo sapiens GN=ADRA1D PE=2 SV=2
HC	Q14573|ITPR3_HUMAN	24.69	0	1	1		304105	Inositol 1 4 5-trisphosphate receptor type 3 OS=Homo sapiens GN=ITPR3 PE=1 SV=2
HC	Q15643|TRIPB_HUMAN	26.48	1	2	2		227584	Thyroid receptor-interacting protein 11 OS=Homo sapiens GN=TRIP11 PE=1 SV=3
HC	Q6ZVF9|GRIN3_HUMAN	21.04	2	1	1		82439	G protein-regulated inducer of neurite outgrowth 3 OS=Homo sapiens GN=GPRIN3 PE=2 SV=2
HC	Q9BYG4|PAR6G_HUMAN	22.25	3	1	1		40883	Partitioning defective 6 homolog gamma OS=Homo sapiens GN=PARD6G PE=1 SV=1
HC	Q9NZJ6|COQ3_HUMAN	24	2	1	1		41054	Hexaprenyldihydroxybenzoate methyltransferase mitochondrial OS=Homo sapiens GN=COQ3 PE=1 SV=3
HC	Q7Z5J4|RAI1_HUMAN	20.45	1	1	1		203350	Retinoic acid-induced protein 1 OS=Homo sapiens GN=RAI1 PE=1 SV=2
HC	P11137|MTAP2_HUMAN	23.71	1	1	1		199525	Microtubule-associated protein 2 OS=Homo sapiens GN=MAP2 PE=1 SV=4
HC	Q00872|MYPC1_HUMAN	23.27	1	1	1		128294	Myosin-binding protein C slow-type OS=Homo sapiens GN=MYBPC1 PE=1 SV=2
HC	Q8NE18|NSUN7_HUMAN	21.41	1	1	1		81040	Putative methyltransferase NSUN7 OS=Homo sapiens GN=NSUN7 PE=2 SV=4
HC	Q8N9T8|KRI1_HUMAN	22.38	3	1	1		82598	Protein KRI1 homolog OS=Homo sapiens GN=KRI1 PE=1 SV=3
HC	Q9P2D7|DYH1_HUMAN	21.92	0	1	1		493957	Dynein heavy chain 1 axonemal OS=Homo sapiens GN=DNAH1 PE=2 SV=4
HC	Q9UQ53|MGT4B_HUMAN	20.2	3	1	1		63199	Alpha-1 3-mannosyl-glycoprotein 4-beta-N-acetylglucosaminyltransferase B OS=Homo sapiens GN=MGAT4B PE=1 SV=1
HC	A0FGR9|ESYT3_HUMAN	20.31	2	1	1	Carbamidomethylation	100035	Extended synaptotagmin-3 OS=Homo sapiens GN=ESYT3 PE=1 SV=1
HC	A6NE01|F186A_HUMAN	22.46	0	1	1		262755	Protein FAM186A OS=Homo sapiens GN=FAM186A PE=2 SV=3
HC	Q8TEQ0|SNX29_HUMAN	23.34	1	1	1		91254	Sorting nexin-29 OS=Homo sapiens GN=SNX29 PE=1 SV=3
HC	Q8NET6|CHSTD_HUMAN	22.78	3	1	1		38920	Carbohydrate sulfotransferase 13 OS=Homo sapiens GN=CHST13 PE=2 SV=1
HC	O60673|DPOLZ_HUMAN	20.27	0	1	1		352776	DNA polymerase zeta catalytic subunit OS=Homo sapiens GN=REV3L PE=1 SV=2
HC	Q4G0P3|HYDIN_HUMAN	25.77	0	2	2		575900	Hydrocephalus-inducing protein homolog OS=Homo sapiens GN=HYDIN PE=1 SV=3
HC	Q96JB6|LOXL4_HUMAN	24.12	1	1	1		84483	Lysyl oxidase homolog 4 OS=Homo sapiens GN=LOXL4 PE=1 SV=1
HC	Q5THK1|PR14L_HUMAN	21.71	1	1	1		237297	Protein PRR14L OS=Homo sapiens GN=PRR14L PE=1 SV=1
HC	P21817|RYR1_HUMAN	22.79	0	1	1	Carbamidomethylation	565184	Ryanodine receptor 1 OS=Homo sapiens GN=RYR1 PE=1 SV=3
HC	Q5JWF8|ACL10_HUMAN	20.43	4	1	1		26751	Actin-like protein 10 OS=Homo sapiens GN=ACTL10 PE=2 SV=1
HC	Q6ZTZ1|MSD1_HUMAN	20.36	3	1	1		31632	Myb/SANT-like DNA-binding domain-containing protein 1 OS=Homo sapiens GN=MSANTD1 PE=2 SV=2
HC	Q15545|TAF7_HUMAN	21.32	2	1	1		40259	Transcription initiation factor TFIID subunit 7 OS=Homo sapiens GN=TAF7 PE=1 SV=1
HC	Q9Y2P4|S27A6_HUMAN	27.37	3	2	2		70112	Long-chain fatty acid transport protein 6 OS=Homo sapiens GN=SLC27A6 PE=1 SV=1
HC	Q9UPV9|TRAK1_HUMAN	20.15	2	1	1	Carbamidomethylation	106040	Trafficking kinesin-binding protein 1 OS=Homo sapiens GN=TRAK1 PE=1 SV=1
HC	Q6UXY1|BI2L2_HUMAN	20.71	2	1	1		58987	Brain-specific angiogenesis inhibitor 1-associated protein 2-like protein 2 OS=Homo sapiens GN=BAIAP2L2 PE=1 SV=1
HC	Q92823|NRCAM_HUMAN	21.41	0	1	1		143889	Neuronal cell adhesion molecule OS=Homo sapiens GN=NRCAM PE=1 SV=3
HC	Q5QGS0|K2022_HUMAN	28.84	1	2	2		167550	Uncharacterized protein KIAA2022 OS=Homo sapiens GN=KIAA2022 PE=2 SV=1
HC	Q10713|MPPA_HUMAN	20.79	3	1	1		58253	Mitochondrial-processing peptidase subunit alpha OS=Homo sapiens GN=PMPCA PE=1 SV=2
HC	P50990|TCPQ_HUMAN	22.83	2	1	1	Carbamidomethylation	59621	T-complex protein 1 subunit theta OS=Homo sapiens GN=CCT8 PE=1 SV=4
HC	P12107|COBA1_HUMAN	24.49	2	2	1	Oxidation (M)	181064	Collagen alpha-1(XI) chain OS=Homo sapiens GN=COL11A1 PE=1 SV=4
HC	P02748|CO9_HUMAN	90.37	5	2	2		63173	Complement component C9 OS=Homo sapiens GN=C9 PE=1 SV=2
HC	P26927|HGFL_HUMAN	99.04	3	2	2	Carbamidomethylation	80320	Hepatocyte growth factor-like protein OS=Homo sapiens GN=MST1 PE=1 SV=2
HC	P00747|PLMN_HUMAN	74.49	2	2	2	Carbamidomethylation	90569	Plasminogen OS=Homo sapiens GN=PLG PE=1 SV=2
HC	Q08554|DSC1_HUMAN	75.95	3	2	2		99987	Desmocollin-1 OS=Homo sapiens GN=DSC1 PE=1 SV=2
HC	P55786|PSA_HUMAN	21.28	1	1	1		103276	Puromycin-sensitive aminopeptidase OS=Homo sapiens GN=NPEPPS PE=1 SV=2
HC	P33981|TTK_HUMAN	27.38	1	1	1		97072	Dual specificity protein kinase TTK OS=Homo sapiens GN=TTK PE=1 SV=2
HC	O43149|ZZEF1_HUMAN	20.95	1	1	1		331075	Zinc finger ZZ-type and EF-hand domain-containing protein 1 OS=Homo sapiens GN=ZZEF1 PE=1 SV=6
HC	P18428|LBP_HUMAN	106.57	10	3	3		53384	Lipopolysaccharide-binding protein OS=Homo sapiens GN=LBP PE=1 SV=3
HC	P32189|GLPK_HUMAN	32.54	1	1	1		61245	Glycerol kinase OS=Homo sapiens GN=GK PE=1 SV=3
HC	Q8IWZ3|ANKH1_HUMAN	31.79	0	1	1		269455	Ankyrin repeat and KH domain-containing protein 1 OS=Homo sapiens GN=ANKHD1 PE=1 SV=1
HC	Q13107|UBP4_HUMAN	23.99	1	1	1		108565	Ubiquitin carboxyl-terminal hydrolase 4 OS=Homo sapiens GN=USP4 PE=1 SV=3
HC	P14923|PLAK_HUMAN	28.04	1	1	1		81745	Junction plakoglobin OS=Homo sapiens GN=JUP PE=1 SV=3
HC	Q6ZU80|CE128_HUMAN	23.41	1	1	1		128015	Centrosomal protein of 128 kDa OS=Homo sapiens GN=CEP128 PE=1 SV=2
HC	P01833|PIGR_HUMAN	26.05	1	1	1		83284	Polymeric immunoglobulin receptor OS=Homo sapiens GN=PIGR PE=1 SV=4
HC	Q15111|PLCL1_HUMAN	25.92	1	1	1		122728	Inactive phospholipase C-like protein 1 OS=Homo sapiens GN=PLCL1 PE=1 SV=3
HC	P20701|ITAL_HUMAN	22.47	1	1	1		128769	Integrin alpha-L OS=Homo sapiens GN=ITGAL PE=1 SV=3
HC	Q7Z392|TPC11_HUMAN	23.16	1	1	1		128881	Trafficking protein particle complex subunit 11 OS=Homo sapiens GN=TRAPPC11 PE=1 SV=2
HC	Q8NHY0|B4GN2_HUMAN	22.12	1	1	1		63258	Beta-1 4 N-acetylgalactosaminyltransferase 2 OS=Homo sapiens GN=B4GALNT2 PE=1 SV=2
p SS	P02774|VTDB_HUMAN	419.19	81	42	42	Carbamidomethylation; Oxidation (M)	52964	Vitamin D-binding protein OS=Homo sapiens GN=GC PE=1 SV=1
p SS	P01009|A1AT_HUMAN	427.52	70	42	40	Carbamidomethylation; Oxidation (M)	46737	Alpha-1-antitrypsin OS=Homo sapiens GN=SERPINA1 PE=1 SV=3
p SS	P04264|K2C1_HUMAN	395.12	65	49	38	Carbamidomethylation; Oxidation (M)	66039	Keratin type II cytoskeletal 1 OS=Homo sapiens GN=KRT1 PE=1 SV=6
p SS	P01008|ANT3_HUMAN	393.17	61	37	37	Carbamidomethylation; Oxidation (M)	52602	Antithrombin-III OS=Homo sapiens GN=SERPINC1 PE=1 SV=1
p SS	P02787|TRFE_HUMAN	425.95	62	45	45	Carbamidomethylation; Oxidation (M)	77064	Serotransferrin OS=Homo sapiens GN=TF PE=1 SV=3
p SS	P35527|K1C9_HUMAN	375.81	59	31	30	Oxidation (M)	62064	Keratin type I cytoskeletal 9 OS=Homo sapiens GN=KRT9 PE=1 SV=3
p SS	P13645|K1C10_HUMAN	394.28	53	33	25	Carbamidomethylation; Oxidation (M)	58827	Keratin type I cytoskeletal 10 OS=Homo sapiens GN=KRT10 PE=1 SV=6
p SS	P02768|ALBU_HUMAN	443.72	84	69	69	Carbamidomethylation; Oxidation (M)	69367	Serum albumin OS=Homo sapiens GN=ALB PE=1 SV=2
p SS	P35908|K22E_HUMAN	379.4	64	42	28	Carbamidomethylation; Oxidation (M)	65433	Keratin type II cytoskeletal 2 epidermal OS=Homo sapiens GN=KRT2 PE=1 SV=2
p SS	P01024|CO3_HUMAN	369.72	35	47	47	Carbamidomethylation; Oxidation (M)	187147	Complement C3 OS=Homo sapiens GN=C3 PE=1 SV=2
p SS	P02538|K2C6A_HUMAN	337.62	45	30	3	Carbamidomethylation; Oxidation (M)	60045	Keratin type II cytoskeletal 6A OS=Homo sapiens GN=KRT6A PE=1 SV=3
p SS	P01023|A2MG_HUMAN	345.59	29	31	31	Carbamidomethylation; Oxidation (M)	163290	Alpha-2-macroglobulin OS=Homo sapiens GN=A2M PE=1 SV=3
p SS	P01042|KNG1_HUMAN	363.43	34	28	28	Carbamidomethylation; Oxidation (M)	71957	Kininogen-1 OS=Homo sapiens GN=KNG1 PE=1 SV=2
p SS	P13647|K2C5_HUMAN	315.98	41	28	15	Carbamidomethylation; Oxidation (M)	62378	Keratin type II cytoskeletal 5 OS=Homo sapiens GN=KRT5 PE=1 SV=3
p SS	P0C0L5|CO4B_HUMAN	309.23	15	17	2	Oxidation (M)	192750	Complement C4-B OS=Homo sapiens GN=C4B PE=1 SV=2
p SS	Q14624|ITIH4_HUMAN	339.55	22	23	23	Oxidation (M)	103357	Inter-alpha-trypsin inhibitor heavy chain H4 OS=Homo sapiens GN=ITIH4 PE=1 SV=4
p SS	P0C0L4|CO4A_HUMAN	305.99	15	17	2	Carbamidomethylation; Oxidation (M)	192784	Complement C4-A OS=Homo sapiens GN=C4A PE=1 SV=2
p SS	P00751|CFAB_HUMAN	283.88	24	18	18	Carbamidomethylation	85533	Complement factor B OS=Homo sapiens GN=CFB PE=1 SV=2
p SS	P01011|AACT_HUMAN	349.36	49	27	27	Oxidation (M)	47651	Alpha-1-antichymotrypsin OS=Homo sapiens GN=SERPINA3 PE=1 SV=2
p SS	P19013|K2C4_HUMAN	321.44	43	25	18	Carbamidomethylation; Oxidation (M)	57285	Keratin type II cytoskeletal 4 OS=Homo sapiens GN=KRT4 PE=1 SV=4
p SS	P01857|IGHG1_HUMAN	334.41	64	18	8	Carbamidomethylation; Oxidation (M)	36106	Ig gamma-1 chain C region OS=Homo sapiens GN=IGHG1 PE=1 SV=1
p SS	P02749|APOH_HUMAN	341.68	57	18	18	Carbamidomethylation	38298	Beta-2-glycoprotein 1 OS=Homo sapiens GN=APOH PE=1 SV=3
p SS	P01860|IGHG3_HUMAN	324.99	52	18	8	Carbamidomethylation; Oxidation (M)	41287	Ig gamma-3 chain C region OS=Homo sapiens GN=IGHG3 PE=1 SV=2
p SS	P05543|THBG_HUMAN	273.89	46	15	15	Oxidation (M)	46325	Thyroxine-binding globulin OS=Homo sapiens GN=SERPINA7 PE=1 SV=2
p SS	P29622|KAIN_HUMAN	300.69	44	17	17	Carbamidomethylation; Oxidation (M)	48542	Kallistatin OS=Homo sapiens GN=SERPINA4 PE=1 SV=3
p SS	P02790|HEMO_HUMAN	239.74	34	15	15	Carbamidomethylation; Oxidation (M)	51676	Hemopexin OS=Homo sapiens GN=HPX PE=1 SV=2
p SS	P02647|APOA1_HUMAN	250.35	48	10	10	Oxidation (M)	30778	Apolipoprotein A-I OS=Homo sapiens GN=APOA1 PE=1 SV=1
p SS	P19823|ITIH2_HUMAN	281.9	17	14	14		106463	Inter-alpha-trypsin inhibitor heavy chain H2 OS=Homo sapiens GN=ITIH2 PE=1 SV=2
p SS	P04745|AMY1_HUMAN	266.01	41	15	15	Carbamidomethylation	57768	Alpha-amylase 1 OS=Homo sapiens GN=AMY1A PE=1 SV=2
p SS	P00736|C1R_HUMAN	248.02	24	10	10	Carbamidomethylation	80119	Complement C1r subcomponent OS=Homo sapiens GN=C1R PE=1 SV=2
p SS	P13646|K1C13_HUMAN	289.46	44	20	8	Carbamidomethylation; Oxidation (M)	49588	Keratin type I cytoskeletal 13 OS=Homo sapiens GN=KRT13 PE=1 SV=4
p SS	P01876|IGHA1_HUMAN	335.28	63	21	8	Carbamidomethylation; Oxidation (M)	37655	Ig alpha-1 chain C region OS=Homo sapiens GN=IGHA1 PE=1 SV=2
p SS	P01861|IGHG4_HUMAN	289.46	52	14	7	Carbamidomethylation; Oxidation (M)	35941	Ig gamma-4 chain C region OS=Homo sapiens GN=IGHG4 PE=1 SV=1
p SS	P08185|CBG_HUMAN	263	32	12	12	Oxidation (M)	45141	Corticosteroid-binding globulin OS=Homo sapiens GN=SERPINA6 PE=1 SV=1
p SS	P01871|IGHM_HUMAN	255.51	31	11	11	Carbamidomethylation; Oxidation (M)	49307	Ig mu chain C region OS=Homo sapiens GN=IGHM PE=1 SV=3
p SS	P02765|FETUA_HUMAN	263.26	30	12	12	Carbamidomethylation; Oxidation (M)	39325	Alpha-2-HS-glycoprotein OS=Homo sapiens GN=AHSG PE=1 SV=1
p SS	P02533|K1C14_HUMAN	235.55	22	11	4	Oxidation (M)	51562	Keratin type I cytoskeletal 14 OS=Homo sapiens GN=KRT14 PE=1 SV=4
p SS	P01859|IGHG2_HUMAN	275.53	55	17	6	Carbamidomethylation; Oxidation (M)	35901	Ig gamma-2 chain C region OS=Homo sapiens GN=IGHG2 PE=1 SV=2
p SS	P01877|IGHA2_HUMAN	311.08	53	16	3	Carbamidomethylation; Oxidation (M)	36526	Ig alpha-2 chain C region OS=Homo sapiens GN=IGHA2 PE=1 SV=3
p SS	P04004|VTNC_HUMAN	271.34	29	16	16	Carbamidomethylation; Oxidation (M)	54306	Vitronectin OS=Homo sapiens GN=VTN PE=1 SV=1
p SS	P00450|CERU_HUMAN	217.4	14	11	11	Carbamidomethylation; Oxidation (M)	122205	Ceruloplasmin OS=Homo sapiens GN=CP PE=1 SV=1
p SS	Q96IY4|CBPB2_HUMAN	205.95	27	11	11	Carbamidomethylation; Oxidation (M)	48424	Carboxypeptidase B2 OS=Homo sapiens GN=CPB2 PE=1 SV=2
p SS	P01019|ANGT_HUMAN	287.42	31	13	13	Oxidation (M)	53154	Angiotensinogen OS=Homo sapiens GN=AGT PE=1 SV=1
p SS	P08697|A2AP_HUMAN	204.75	27	11	11	Carbamidomethylation; Oxidation (M)	54566	Alpha-2-antiplasmin OS=Homo sapiens GN=SERPINF2 PE=1 SV=3
p SS	P00738|HPT_HUMAN	218.67	30	10	10	Carbamidomethylation	45205	Haptoglobin OS=Homo sapiens GN=HP PE=1 SV=1
p SS	P05546|HEP2_HUMAN	183.05	20	9	9		57071	Heparin cofactor 2 OS=Homo sapiens GN=SERPIND1 PE=1 SV=3
p SS	P08779|K1C16_HUMAN	279.05	30	14	4	Oxidation (M)	51268	Keratin type I cytoskeletal 16 OS=Homo sapiens GN=KRT16 PE=1 SV=4
p SS	P05156|CFAI_HUMAN	161.99	11	6	6	Carbamidomethylation	65750	Complement factor I OS=Homo sapiens GN=CFI PE=1 SV=2
p SS	P08571|CD14_HUMAN	229.05	30	8	8	Carbamidomethylation; Oxidation (M)	40076	Monocyte differentiation antigen CD14 OS=Homo sapiens GN=CD14 PE=1 SV=2
p SS	P27918|PROP_HUMAN	201.83	22	7	7	Carbamidomethylation	51276	Properdin OS=Homo sapiens GN=CFP PE=1 SV=2
p SS	Q9UGM5|FETUB_HUMAN	190.2	20	8	8	Carbamidomethylation; Oxidation (M)	42055	Fetuin-B OS=Homo sapiens GN=FETUB PE=1 SV=2
p SS	P04196|HRG_HUMAN	192.22	13	5	5		59578	Histidine-rich glycoprotein OS=Homo sapiens GN=HRG PE=1 SV=1
p SS	P04114|APOB_HUMAN	120.84	1	3	3		515611	Apolipoprotein B-100 OS=Homo sapiens GN=APOB PE=1 SV=2
p SS	P01781|HV320_HUMAN	177.27	41	6	4	Oxidation (M)	12730	Ig heavy chain V-III region GAL OS=Homo sapiens PE=1 SV=1
p SS	P01834|IGKC_HUMAN	225.71	80	5	5	Carbamidomethylation	11609	Ig kappa chain C region OS=Homo sapiens GN=IGKC PE=1 SV=1
p SS	Q86YZ3|HORN_HUMAN	60.37	1	2	2		282389	Hornerin OS=Homo sapiens GN=HRNR PE=1 SV=2
p SS	Q9UHG3|PCYOX_HUMAN	175.49	12	4	4		56640	Prenylcysteine oxidase 1 OS=Homo sapiens GN=PCYOX1 PE=1 SV=3
p SS	P51884|LUM_HUMAN	175.92	25	6	6		38429	Lumican OS=Homo sapiens GN=LUM PE=1 SV=2
p SS	P01765|HV304_HUMAN	179.83	36	5	2	Carbamidomethylation	12356	Ig heavy chain V-III region TIL OS=Homo sapiens PE=1 SV=1
p SS	Q8N1N4|K2C78_HUMAN	174.5	12	7	3	Carbamidomethylation	56866	Keratin type II cytoskeletal 78 OS=Homo sapiens GN=KRT78 PE=2 SV=2
p SS	P04180|LCAT_HUMAN	195.88	18	6	6	Carbamidomethylation	49578	Phosphatidylcholine-sterol acyltransferase OS=Homo sapiens GN=LCAT PE=1 SV=1
p SS	Q9Y6R7|FCGBP_HUMAN	107.29	0	2	2	Carbamidomethylation	572021	IgGFc-binding protein OS=Homo sapiens GN=FCGBP PE=1 SV=3
p SS	P01766|HV305_HUMAN	179.04	40	4	2	Carbamidomethylation	13227	Ig heavy chain V-III region BRO OS=Homo sapiens PE=1 SV=1
p SS	P49908|SEPP1_HUMAN	125.06	7	3	3	Carbamidomethylation	43174	Selenoprotein P OS=Homo sapiens GN=SEPP1 PE=1 SV=3
p SS	Q02413|DSG1_HUMAN	197.45	10	6	6	Carbamidomethylation; Oxidation (M)	113748	Desmoglein-1 OS=Homo sapiens GN=DSG1 PE=1 SV=2
p SS	P0CG05|LAC2_HUMAN	158.65	38	3	3	Carbamidomethylation	11294	Ig lambda-2 chain C regions OS=Homo sapiens GN=IGLC2 PE=1 SV=1
p SS	P0CG06|LAC3_HUMAN	158.65	38	3	3	Carbamidomethylation	11237	Ig lambda-3 chain C regions OS=Homo sapiens GN=IGLC3 PE=1 SV=1
p SS	P68871|HBB_HUMAN	115.9	15	2	2		15998	Hemoglobin subunit beta OS=Homo sapiens GN=HBB PE=1 SV=2
p SS	P01767|HV306_HUMAN	142.2	36	4	2	Carbamidomethylation	12379	Ig heavy chain V-III region BUT OS=Homo sapiens PE=1 SV=1
p SS	P01764|HV303_HUMAN	187.23	28	5	2	Carbamidomethylation; Oxidation (M)	12582	Ig heavy chain V-III region VH26 OS=Homo sapiens PE=1 SV=1
p SS	P00742|FA10_HUMAN	130.38	5	3	3		54732	Coagulation factor X OS=Homo sapiens GN=F10 PE=1 SV=2
p SS	P04040|CATA_HUMAN	150.96	7	3	3		59756	Catalase OS=Homo sapiens GN=CAT PE=1 SV=3
p SS	P15924|DESP_HUMAN	273.56	6	15	15	Oxidation (M)	331774	Desmoplakin OS=Homo sapiens GN=DSP PE=1 SV=3
p SS	P06396|GELS_HUMAN	99.86	4	2	2		85697	Gelsolin OS=Homo sapiens GN=GSN PE=1 SV=1
p SS	P0CG04|LAC1_HUMAN	167.36	47	3	3	Carbamidomethylation	11348	Ig lambda-1 chain C regions OS=Homo sapiens GN=IGLC1 PE=1 SV=1
p SS	B9A064|IGLL5_HUMAN	167.36	23	3	3	Carbamidomethylation	23063	Immunoglobulin lambda-like polypeptide 5 OS=Homo sapiens GN=IGLL5 PE=2 SV=2
p SS	P06331|HV209_HUMAN	142.88	18	3	2	Carbamidomethylation	16228	Ig heavy chain V-II region ARH-77 OS=Homo sapiens PE=4 SV=1
p SS	Q96PD5|PGRP2_HUMAN	90.52	7	3	3	Carbamidomethylation	62217	N-acetylmuramoyl-L-alanine amidase OS=Homo sapiens GN=PGLYRP2 PE=1 SV=1
p SS	P10909|CLUS_HUMAN	61.06	5	2	2		52495	Clusterin OS=Homo sapiens GN=CLU PE=1 SV=1
p SS	P01040|CYTA_HUMAN	154.01	45	3	3		11006	Cystatin-A OS=Homo sapiens GN=CSTA PE=1 SV=1
p SS	P25705|ATPA_HUMAN	104.58	3	2	2		59751	ATP synthase subunit alpha mitochondrial OS=Homo sapiens GN=ATP5A1 PE=1 SV=1
p SS	P04003|C4BPA_HUMAN	121.27	4	2	2		67033	C4b-binding protein alpha chain OS=Homo sapiens GN=C4BPA PE=1 SV=2
p SS	Q9UK55|ZPI_HUMAN	113.1	6	2	2		50707	Protein Z-dependent protease inhibitor OS=Homo sapiens GN=SERPINA10 PE=1 SV=1
p SS	P35858|ALS_HUMAN	75.22	6	2	2		66035	Insulin-like growth factor-binding protein complex acid labile subunit OS=Homo sapiens GN=IGFALS PE=1 SV=1
p SS	Q96KN2|CNDP1_HUMAN	63.65	7	2	2		56706	Beta-Ala-His dipeptidase OS=Homo sapiens GN=CNDP1 PE=1 SV=4
p SS	Q8IVL0|NAV3_HUMAN	44.78	1	2	2		255646	Neuron navigator 3 OS=Homo sapiens GN=NAV3 PE=1 SV=3
p SS	A6NJ16|IV4F8_HUMAN	63.37	11	2	2		13585	Putative V-set and immunoglobulin domain-containing-like protein IGHV4OR15-8 OS=Homo sapiens GN=IGHV4OR15-8 PE=5 SV=2
p SS	P20929|NEBU_HUMAN	42.81	0	2	2		772944	Nebulin OS=Homo sapiens GN=NEB PE=1 SV=4
p SS	P02748|CO9_HUMAN	64.21	4	2	2		63173	Complement component C9 OS=Homo sapiens GN=C9 PE=1 SV=2
p SS	P00747|PLMN_HUMAN	58.82	4	2	2	Carbamidomethylation	90569	Plasminogen OS=Homo sapiens GN=PLG PE=1 SV=2
p SS	P04438|HV208_HUMAN	72.09	10	2	2		16323	Ig heavy chain V-II region SESS OS=Homo sapiens PE=2 SV=1
p SS	Q08554|DSC1_HUMAN	95.14	3	2	2		99987	Desmocollin-1 OS=Homo sapiens GN=DSC1 PE=1 SV=2
p SS	P06576|ATPB_HUMAN	105.88	5	2	2		56560	ATP synthase subunit beta mitochondrial OS=Homo sapiens GN=ATP5B PE=1 SV=3
p SS	P18428|LBP_HUMAN	135.03	12	4	4		53384	Lipopolysaccharide-binding protein OS=Homo sapiens GN=LBP PE=1 SV=3
p SS	P04217|A1BG_HUMAN	93.2	5	2	2	Carbamidomethylation	54254	Alpha-1B-glycoprotein OS=Homo sapiens GN=A1BG PE=1 SV=4
p SS	P08603|CFAH_HUMAN	87.8	2	2	2	Carbamidomethylation	139096	Complement factor H OS=Homo sapiens GN=CFH PE=1 SV=4
p SS	P07357|CO8A_HUMAN	115.75	5	2	2	Carbamidomethylation	65163	Complement component C8 alpha chain OS=Homo sapiens GN=C8A PE=1 SV=2
p SS	P00734|THRB_HUMAN	61.33	5	2	2	Carbamidomethylation	70037	Prothrombin OS=Homo sapiens GN=F2 PE=1 SV=2
p SS	P14923|PLAK_HUMAN	119.3	4	3	3		81745	Junction plakoglobin OS=Homo sapiens GN=JUP PE=1 SV=3
p SS	P53597|SUCA_HUMAN	54.36	4	2	2		36250	Succinyl-CoA ligase [ADP/GDP-forming] subunit alpha mitochondrial OS=Homo sapiens GN=SUCLG1 PE=1 SV=4
p SS	P07358|CO8B_HUMAN	144.22	5	3	3	Carbamidomethylation	67047	Complement component C8 beta chain OS=Homo sapiens GN=C8B PE=1 SV=3
p SS	P19652|A1AG2_HUMAN	97.36	14	2	2	Carbamidomethylation	23603	Alpha-1-acid glycoprotein 2 OS=Homo sapiens GN=ORM2 PE=1 SV=2
p SS	P02763|A1AG1_HUMAN	52.23	15	2	2		23512	Alpha-1-acid glycoprotein 1 OS=Homo sapiens GN=ORM1 PE=1 SV=1
