# Supplementary material for: Low Levels of IgG Recognizing the Alpha-1-Antitrypsin (A1AT) <sup>50-63</sup> Peptide and Its Association with Taiwanese Women with Primary Sj&ouml;gren's Syndrome
Source: Preprints.org preprint supplement (doi:10.20944/preprints201710.0180.v1), 2017-10-30
Supplement: Supplementary file 1 [file supplementary]

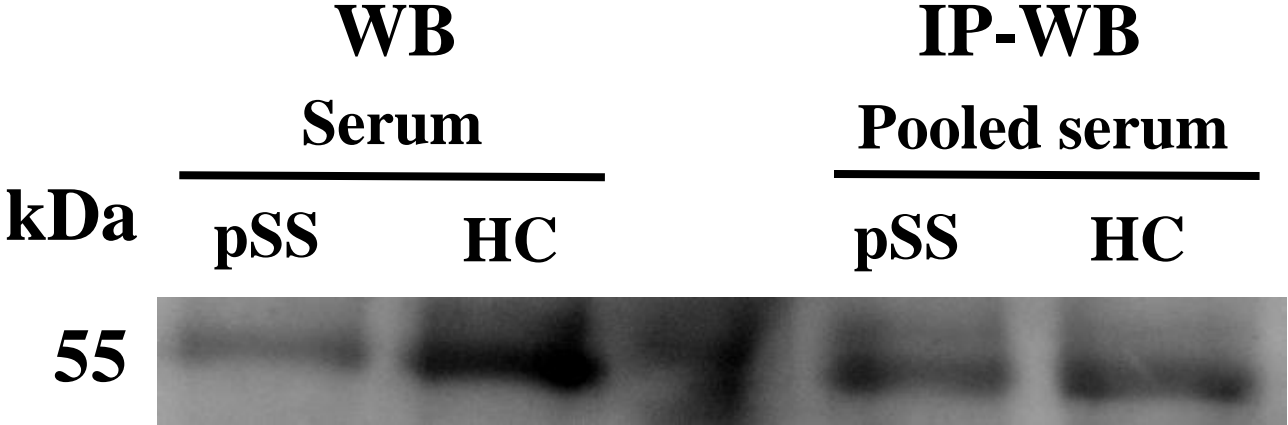

| Antibodies          |              |
|---------------------|--------------|
| Immunoprecipitation | Western blot |
| anti-A1AT           | anti-HNE     |

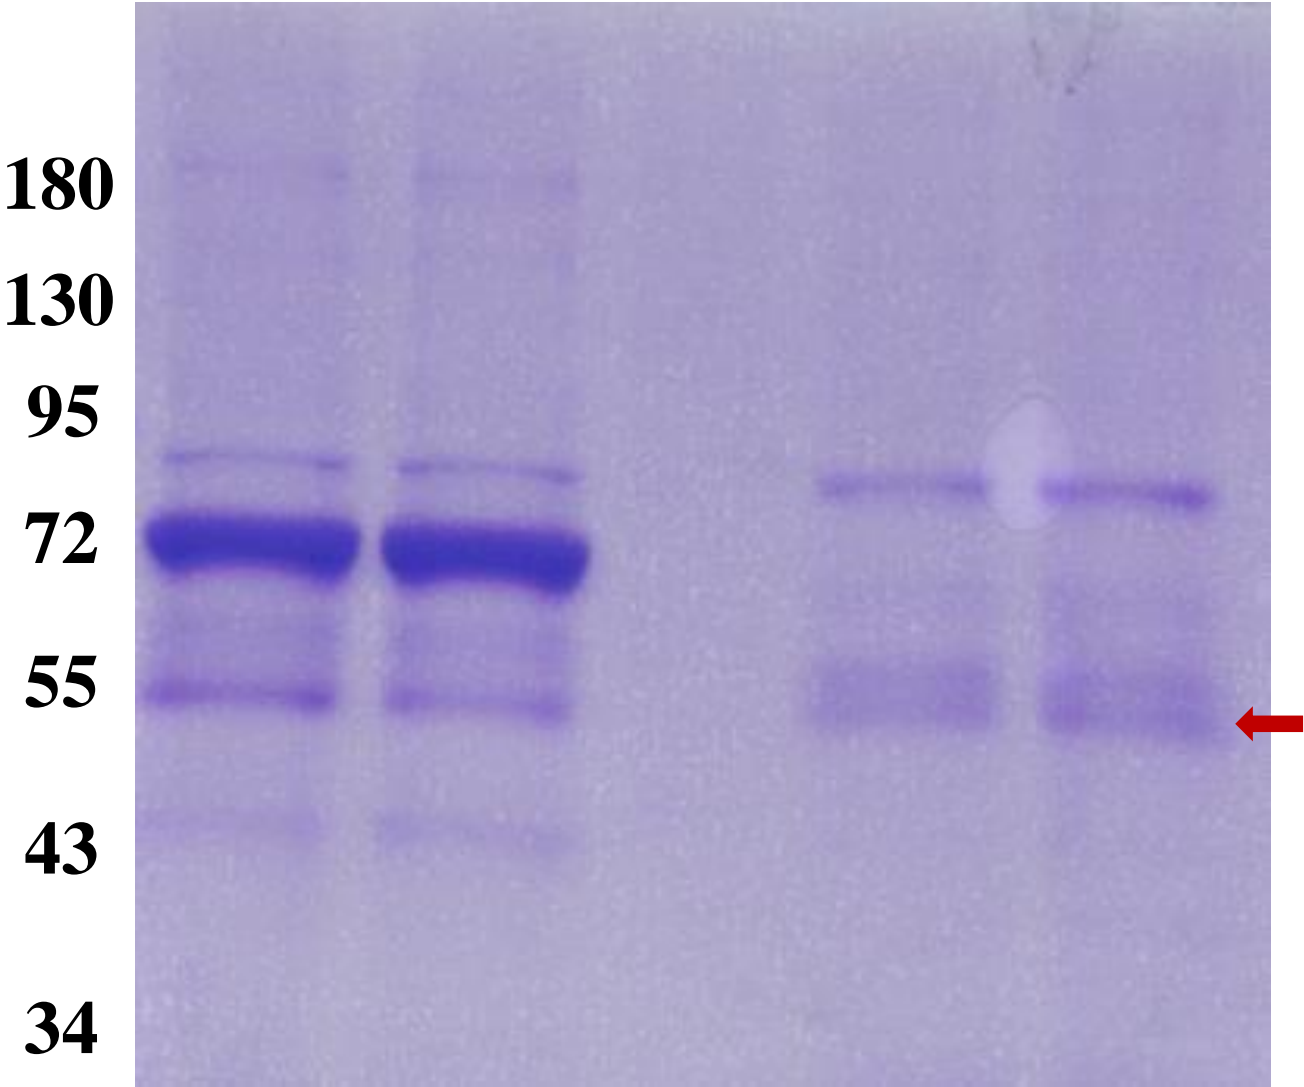

Figure 2. 4-Hydroxy-2-nonenal (HNE) modification of the serum A1AT protein was validated using IP and Western blotting. A1AT was immunoprecipitated from pooled serum samples [40 patients with primary Sjögren's syndrome (pSS) and 40 healthy controls (HCs)] using anti-A1AT antibodies and then subjected to Western blotting with anti-HNE antibodies (upper panel). Individually selected random serum samples (patient with pSS and HC) were used as controls; these were simultaneously used for Western blotting with anti-HNE antibodies. A duplicate gel was stained with Coomassie brilliant blue as a loading control (bottom panel). The red arrow indicates the A1AT protein.
