# Supplementary material for: Low Levels of IgG Recognizing the Alpha-1-Antitrypsin (A1AT) <sup>50-63</sup> Peptide and Its Association with Taiwanese Women with Primary Sj&ouml;gren's Syndrome
Source: Preprints.org preprint supplement (doi:10.20944/preprints201710.0180.v1), 2017-10-30
Supplement: Supplementary file 2 [file 0 Supplementary Table 3 20170901 v1.2 A1AT-HNE.xlsx]

## Sheet: 工作表1
IPTN
HC1
Protein Accession	Peptide	Unique	-10lgP	Mass	ppm	m/z	z	RT	Scan	#Spec	Start	End	PTM
P02768|ALBU_HUMAN	K.VFDEFKPLVEEPQNLIK.Q	Y	91.68	2044.09	1.4	1023.05	2	59.79	14518	12	397	413
P02768|ALBU_HUMAN	K.EFNAETFTFHADIC(+57.02)TLSEK.E	Y	90.33	2259.02	2.3	1130.52	2	56.53	13598	13	525	543	Carbamidomethylation
P02768|ALBU_HUMAN	K.QNC(+57.02)ELFEQLGEYK.F	Y	84.3	1656.75	0.8	829.381	2	52.05	12333	7	414	426	Carbamidomethylation
P02768|ALBU_HUMAN	K.SHC(+57.02)IAEVENDEMPADLPSLAADFVESK.D	Y	83.59	2973.34	3	992.123	3	67.24	16597	4	311	337	Carbamidomethylation
P02768|ALBU_HUMAN	K.KVPQVSTPTLVEVSR.N	Y	83.44	1638.93	1	820.473	2	40.32	8952	13	438	452
P02768|ALBU_HUMAN	K.SHC(+57.02)IAEVENDEM(+15.99)PADLPSLAADFVESK.D	Y	83.08	2989.33	1	997.452	3	62.2	15188	12	311	337	Carbamidomethylation; Oxidation (M)
P02768|ALBU_HUMAN	K.YIC(+57.02)ENQDSISSK.L	Y	81.72	1442.63	1	722.325	2	23.66	4037	13	287	298	Carbamidomethylation
P02768|ALBU_HUMAN	R.LVRPEVDVMC(+57.02)TAFHDNEETFLK.K	Y	81.26	2649.26	2.1	884.095	3	55.45	13294	4	139	160	Carbamidomethylation
P02768|ALBU_HUMAN	K.VPQVSTPTLVEVSR.N	Y	80.14	1510.84	0.9	756.426	2	44.21	10090	5	439	452
P02768|ALBU_HUMAN	K.AVMDDFAAFVEK.C	Y	79.65	1341.63	1.1	671.822	2	59.94	14558	4	570	581
P02768|ALBU_HUMAN	R.LVRPEVDVMC(+57.02)TAFHDNEETFLKK.Y	Y	78.39	2777.35	3.4	926.794	3	51.77	12255	7	139	161	Carbamidomethylation
P02768|ALBU_HUMAN	K.DVFLGM(+15.99)FLYEYAR.R	Y	78.23	1638.78	0.4	820.395	2	71.9	17884	9	348	360	Oxidation (M)
P02768|ALBU_HUMAN	R.RPC(+57.02)FSALEVDETYVPK.E	Y	77.32	1909.92	1.1	955.971	2	47.52	11055	6	509	524	Carbamidomethylation
P02768|ALBU_HUMAN	K.AVM(+15.99)DDFAAFVEK.C	Y	77.19	1357.62	1.4	679.819	2	50.85	11996	16	570	581	Oxidation (M)
P02768|ALBU_HUMAN	K.RMPC(+57.02)AEDYLSVVLNQLC(+57.02)VLHEK.T	Y	76.61	2673.31	0.1	892.11	3	74.93	18667	4	469	490	Carbamidomethylation
P02768|ALBU_HUMAN	R.RHPYFYAPELLFFAK.R	Y	75.81	1897.99	2.6	950.004	2	64.46	15822	13	169	183
P02768|ALBU_HUMAN	R.RHPDYSVVLLLR.L	Y	75.46	1466.84	1.8	734.427	2	48.85	11431	10	361	372
P02768|ALBU_HUMAN	R.HPYFYAPELLFFAK.R	Y	74.85	1741.89	1.8	871.952	2	70.37	17462	4	170	183
P02768|ALBU_HUMAN	K.LVNEVTEFAK.T	Y	74.49	1148.61	0.8	575.312	2	39.3	8657	4	66	75
P02768|ALBU_HUMAN	R.M(+15.99)PC(+57.02)AEDYLSVVLNQLC(+57.02)VLHEK.T	Y	74.23	2533.2	0.7	845.408	3	75.86	18906	3	470	490	Oxidation (M); Carbamidomethylation
P02768|ALBU_HUMAN	K.TC(+57.02)VADESAENC(+57.02)DK.S	Y	73.99	1497.57	1	749.794	2	16.45	1895	3	76	88	Carbamidomethylation
P02768|ALBU_HUMAN	R.LVRPEVDVM(+15.99)C(+57.02)TAFHDNEETFLK.K	Y	73.29	2665.25	-0.6	889.424	3	47.73	11115	12	139	160	Oxidation (M); Carbamidomethylation
P02768|ALBU_HUMAN	K.ADDKETC(+57.02)FAEEGKK.L	Y	72.97	1626.72	1	814.368	2	17.25	2135	7	585	598	Carbamidomethylation
P02768|ALBU_HUMAN	K.DVFLGMFLYEYAR.R	Y	72.56	1622.78	0.4	812.398	2	78.49	19481	2	348	360
P02768|ALBU_HUMAN	K.C(+57.02)C(+57.02)AAADPHEC(+57.02)YAK.V	Y	71.59	1551.59	1.1	776.803	2	17.24	2129	4	384	396	Carbamidomethylation
P02768|ALBU_HUMAN	K.C(+57.02)C(+57.02)TESLVNR.R	Y	71.01	1137.49	1.7	569.754	2	23.1	3869	3	500	508	Carbamidomethylation
P02768|ALBU_HUMAN	K.LC(+57.02)TVATLRETYGEMADC(+57.02)C(+57.02)AK.Q	Y	69.44	2348.03	1.4	783.684	3	47.09	10928	2	98	117	Carbamidomethylation
P02768|ALBU_HUMAN	K.VHTEC(+57.02)C(+57.02)HGDLLEC(+57.02)ADDRADLAK.Y	Y	69.36	2584.11	1.3	862.379	3	33.63	7000	10	265	286	Carbamidomethylation
P02768|ALBU_HUMAN	K.SLHTLFGDK.L	Y	69.35	1016.53	1.5	509.273	2	35.99	7691	3	89	97
P02768|ALBU_HUMAN	K.VHTEC(+57.02)C(+57.02)HGDLLEC(+57.02)ADDR.A	Y	68.5	2085.83	0.8	696.285	3	28.15	5382	4	265	281	Carbamidomethylation
P02768|ALBU_HUMAN	R.HPDYSVVLLLR.L	Y	68.45	1310.73	1.5	656.375	2	53.84	12836	4	362	372
P02768|ALBU_HUMAN	K.ADDKETC(+57.02)FAEEGK.K	Y	68.44	1498.62	0.6	750.32	2	20.46	3074	4	585	597	Carbamidomethylation
P02768|ALBU_HUMAN	K.ALVLIAFAQYLQQC(+57.02)PFEDHVK.L	Y	68.42	2489.28	0.8	830.767	3	78.48	19478	8	45	65	Carbamidomethylation
P02768|ALBU_HUMAN	R.LVRPEVDVM(+15.99)C(+57.02)TAFHDNEETFLKK.Y	Y	67.48	2793.35	2	932.125	3	43.88	9998	14	139	161	Oxidation (M); Carbamidomethylation
P02768|ALBU_HUMAN	K.RM(+15.99)PC(+57.02)AEDYLSVVLNQLC(+57.02)VLHEK.T	Y	67.18	2689.3	2.3	897.443	3	72.07	17932	8	469	490	Oxidation (M); Carbamidomethylation
P02768|ALBU_HUMAN	K.LVAASQAALGL	Y	67.12	1012.59	1.7	507.304	2	50.04	11768	4	599	609
P02768|ALBU_HUMAN	K.LC(+57.02)TVATLRETYGEM(+15.99)ADC(+57.02)C(+57.02)AK.Q	Y	66.61	2364.02	1.2	789.015	3	38.21	8347	4	98	117	Carbamidomethylation; Oxidation (M)
P02768|ALBU_HUMAN	R.HPYFYAPELLFFAKR.Y	Y	66.3	1897.99	2.1	633.671	3	64.25	15762	2	170	184
P02768|ALBU_HUMAN	R.MPC(+57.02)AEDYLSVVLNQLC(+57.02)VLHEK.T	Y	65.34	2517.21	1.7	840.078	3	78.62	19510	2	470	490	Carbamidomethylation
P02768|ALBU_HUMAN	K.AAFTEC(+57.02)C(+57.02)QAADK.A	Y	64.32	1370.56	1.8	686.288	2	23.12	3875	5	187	198	Carbamidomethylation
P02768|ALBU_HUMAN	K.KQTALVELVK.H	Y	63.8	1127.69	1.3	564.854	2	36.2	7754	5	549	558
P02768|ALBU_HUMAN	R.ETYGEM(+15.99)ADC(+57.02)C(+57.02)AK.Q	Y	62.08	1449.52	1.1	725.769	2	18.02	2360	8	106	117	Oxidation (M); Carbamidomethylation
P02768|ALBU_HUMAN	K.DDNPNLPR.L	Y	61.73	939.441	1.1	470.728	2	22	3533	3	131	138
P02768|ALBU_HUMAN	R.ETYGEMADC(+57.02)C(+57.02)AK.Q	Y	61.56	1433.53	0.4	717.771	2	25.88	4709	2	106	117	Carbamidomethylation
P02768|ALBU_HUMAN	K.AEFAEVSKLVTDLTK.V	Y	60.91	1649.89	0.9	825.952	2	62.83	15366	2	250	264
P02768|ALBU_HUMAN	K.KYLYEIAR.R	Y	59.7	1054.58	1.2	528.298	2	33.34	6914	4	161	168
P02768|ALBU_HUMAN	K.DLGEENFK.A	Y	59.68	950.434	1.6	476.225	2	29.33	5741	2	37	44
P02768|ALBU_HUMAN	K.QEPERNEC(+57.02)FLQHK.D	Y	59.37	1713.79	0.9	857.903	2	22.73	3758	7	118	130	Carbamidomethylation
P02768|ALBU_HUMAN	K.KLVAASQAALGL	Y	59.29	1140.69	2	571.352	2	44.55	10188	3	598	609
P02768|ALBU_HUMAN	K.LDELRDEGK.A	Y	59.25	1073.54	1.3	537.776	2	18.37	2463	4	206	214
P02768|ALBU_HUMAN	K.ETC(+57.02)FAEEGKK.L	Y	58.15	1197.53	0.9	599.775	2	16.52	1919	5	589	598	Carbamidomethylation
P02768|ALBU_HUMAN	R.FKDLGEENFK.A	Y	57.55	1225.6	1	613.807	2	31.91	6502	4	35	44
P02768|ALBU_HUMAN	R.NEC(+57.02)FLQHKDDNPNLPR.L	Y	57.49	1995.92	0.8	666.315	3	30.94	6212	3	123	138	Carbamidomethylation
P02768|ALBU_HUMAN	K.AEFAEVSK.L	Y	56.86	879.434	0.3	440.724	2	23.79	4079	2	250	257
P02768|ALBU_HUMAN	K.QTALVELVK.H	Y	56.46	999.596	1.1	500.806	2	43.25	9813	2	550	558
P02768|ALBU_HUMAN	K.TPVSDRVTK.C	Y	55.71	1001.55	0.8	501.783	2	15.43	1601	2	491	499
P02768|ALBU_HUMAN	K.YLYEIAR.R	Y	55.42	926.486	0.9	464.251	2	37.28	8070	2	162	168
P02768|ALBU_HUMAN	K.TYETTLEK.C	Y	55.06	983.481	0.7	492.748	2	23.17	3890	3	376	383
P02768|ALBU_HUMAN	R.RHPYFYAPELLFFAKR.Y	Y	54.81	2054.09	1.3	514.53	4	59.27	14372	2	169	184
P02768|ALBU_HUMAN	K.QEPERNEC(+57.02)FLQHKDDNPNLPR.L	Y	54.36	2635.22	3.6	879.417	3	29.7	5848	7	118	138	Carbamidomethylation
P02768|ALBU_HUMAN	K.FQNALLVR.Y	Y	53.83	959.555	0.5	480.785	2	39.6	8741	4	427	434
P02768|ALBU_HUMAN	K.LC(+57.02)TVATLR.E	Y	52.85	932.511	0.3	467.263	2	30.91	6200	2	98	105	Carbamidomethylation
P02768|ALBU_HUMAN	K.ETC(+57.02)FAEEGK.K	Y	51.2	1069.44	1	535.727	2	20.16	2987	2	589	597	Carbamidomethylation
P02768|ALBU_HUMAN	K.AAC(+57.02)LLPK.L	Y	50.29	771.431	2.3	386.724	2	29.54	5802	2	199	205	Carbamidomethylation
P02768|ALBU_HUMAN	K.C(+57.02)C(+57.02)TESLVNRRPC(+57.02)FSALEVDETYVPK.E	Y	49.98	3029.4	1.8	758.36	4	49.74	11681	4	500	524	Carbamidomethylation
P02768|ALBU_HUMAN	K.LVTDLTK.V	Y	47.88	788.464	1.3	395.24	2	27.22	5111	3	258	264
P02768|ALBU_HUMAN	K.YLYEIARR.H	Y	45.03	1082.59	0.8	542.301	2	31.68	6432	4	162	169
P02768|ALBU_HUMAN	R.AFKAWAVAR.L	Y	39.29	1018.57	0.5	510.293	2	34.58	7281	1	234	242
P02768|ALBU_HUMAN	K.EC(+57.02)C(+57.02)EKPLLEK.S	Y	37.98	1304.61	0	435.877	3	22.42	3659	4	301	310	Carbamidomethylation
P02768|ALBU_HUMAN	R.LSQRFPK.A	Y	36.46	874.502	0.2	438.259	2	19.43	2778	2	243	249
P02768|ALBU_HUMAN	K.AAC(+57.02)LLPKLDELRDEGK.A	Y	33.5	1826.96	1.5	457.747	4	45.36	10426	3	199	214	Carbamidomethylation
P02768|ALBU_HUMAN	K.LDELRDEGKASSAK.Q	Y	29.95	1517.77	1.9	506.931	3	17.27	2143	2	206	219
P02768|ALBU_HUMAN	R.M(+15.99)PC(+57.02)AEDYL(+156.12)SVVLNQLC(+57.02)VLHEK.T	Y	29.49	2689.32	0.8	897.447	3	73.16	18229	1	470	490	Oxidation (M); Carbamidomethylation; SL-HNE (L)
P02768|ALBU_HUMAN	R.NEC(+57.02)FLQHK.D	Y	26.71	1074.49	1.1	538.254	2	22.66	3739	3	123	130	Carbamidomethylation
P02787|TRFE_HUMAN	K.IM(+15.99)NGEADAM(+15.99)SLDGGFVYIAGK.C	Y	105.02	2190	0.7	1096.01	2	52.6	12491	4	400	420	Oxidation (M)
P02787|TRFE_HUMAN	K.IMNGEADAM(+15.99)SLDGGFVYIAGK.C	Y	95.39	2174	1.7	1088.01	2	55.44	13290	4	400	420	Oxidation (M)
P02787|TRFE_HUMAN	K.IM(+15.99)NGEADAMSLDGGFVYIAGK.C	Y	94.47	2174	3	1088.01	2	58.33	14109	2	400	420	Oxidation (M)
P02787|TRFE_HUMAN	K.LC(+57.02)MGSGLNLC(+57.02)EPNNK.E	Y	91.03	1705.76	0.7	853.887	2	43.48	9880	2	516	530	Carbamidomethylation
P02787|TRFE_HUMAN	R.FDEFFSEGC(+57.02)APGSK.K	Y	86.35	1576.65	2.2	789.334	2	45.71	10527	2	495	508	Carbamidomethylation
P02787|TRFE_HUMAN	K.IEC(+57.02)VSAETTEDC(+57.02)IAK.I	Y	85.46	1724.76	1.9	863.389	2	32.73	6744	2	385	399	Carbamidomethylation
P02787|TRFE_HUMAN	K.LC(+57.02)M(+15.99)GSGLNLC(+57.02)EPNNK.E	Y	83.9	1721.75	2.3	861.886	2	34.13	7151	3	516	530	Carbamidomethylation; Oxidation (M)
P02787|TRFE_HUMAN	K.MYLGYEYVTAIR.N	Y	83.35	1477.73	1.5	739.872	2	55.41	13277	2	332	343
P02787|TRFE_HUMAN	R.FDEFFSEGC(+57.02)APGSKK.D	Y	81.25	1704.75	1.2	853.381	2	40.62	9043	4	495	509	Carbamidomethylation
P02787|TRFE_HUMAN	R.SAGWNIPIGLLYC(+57.02)DLPEPR.K	Y	80.65	2170.09	1.1	1086.05	2	74.99	18684	5	144	162	Carbamidomethylation
P02787|TRFE_HUMAN	K.M(+15.99)YLGYEYVTAIR.N	Y	80.08	1493.72	0.9	747.869	2	51	12039	3	332	343	Oxidation (M)
P02787|TRFE_HUMAN	K.C(+57.02)STSSLLEAC(+57.02)TFR.R	Y	78.95	1530.68	1.1	766.348	2	45.79	10550	1	684	696	Carbamidomethylation
P02787|TRFE_HUMAN	R.TAGWNIPM(+15.99)GLLYNK.I	Y	76.71	1592.8	1.1	797.409	2	57.64	13911	2	476	489	Oxidation (M)
P02787|TRFE_HUMAN	K.EDPQTFYYAVAVVK.K	Y	76.37	1628.81	1.9	815.413	2	55.42	13281	2	108	121
P02787|TRFE_HUMAN	K.SVIPSDGPSVAC(+57.02)VK.K	Y	76.09	1414.71	0.9	708.364	2	37.21	8051	2	47	60	Carbamidomethylation
P02787|TRFE_HUMAN	K.IMNGEADAMSLDGGFVYIAGK.C	Y	75.96	2158.01	2	1080.01	2	60.97	14847	1	400	420
P02787|TRFE_HUMAN	R.TAGWNIPMGLLYNK.I	Y	75.91	1576.81	1.8	789.412	2	65.4	16084	2	476	489
P02787|TRFE_HUMAN	K.EGYYGYTGAFR.C	Y	75.73	1282.56	2.2	642.29	2	41.62	9330	2	531	541
P02787|TRFE_HUMAN	K.DYELLC(+57.02)LDGTR.K	Y	74.99	1353.62	1.7	677.82	2	52.42	12441	2	577	587	Carbamidomethylation
P02787|TRFE_HUMAN	K.EFQLFSSPHGK.D	Y	73.05	1275.62	0.8	638.82	2	42.34	9543	5	300	310
P02787|TRFE_HUMAN	K.HQTVPQNTGGKNPDPWAK.N	Y	72.9	1973.97	1.1	658.998	3	25.33	4545	4	554	571
P02787|TRFE_HUMAN	K.HSTIFENLANK.A	Y	72.64	1272.65	0.6	637.331	2	37.2	8048	3	226	236
P02787|TRFE_HUMAN	K.SASDLTWDNLK.G	Y	71.43	1248.6	1.8	625.308	2	44.57	10192	2	454	464
P02787|TRFE_HUMAN	K.DSGFQMNQLR.G	Y	71.4	1194.55	1.3	598.281	2	38.57	8450	2	123	132
P02787|TRFE_HUMAN	R.NLREGTC(+57.02)PEAPTDEC(+57.02)KPVK.W	Y	71.38	2200.03	1.5	734.35	3	22.94	3822	4	344	362	Carbamidomethylation
P02787|TRFE_HUMAN	R.WC(+57.02)AVSEHEATK.C	Y	70.69	1316.58	0.4	659.298	2	21.87	3495	4	27	37	Carbamidomethylation
P02787|TRFE_HUMAN	K.INHC(+57.02)RFDEFFSEGC(+57.02)APGSKK.D	Y	70.32	2385.06	1.9	796.03	3	39.56	8734	4	490	509	Carbamidomethylation
P02787|TRFE_HUMAN	K.DGAGDVAFVK.H	Y	70.18	977.482	1.1	489.749	2	33.27	6893	2	216	225
P02787|TRFE_HUMAN	K.DC(+57.02)HLAQVPSHTVVAR.S	Y	69.78	1688.84	1.1	563.955	3	28.23	5406	5	259	273	Carbamidomethylation
P02787|TRFE_HUMAN	K.HQTVPQNTGGK.N	Y	69.61	1165.58	0.9	583.8	2	12.9	900	3	554	564
P02787|TRFE_HUMAN	R.KPVEEYANC(+57.02)HLAR.A	Y	68.67	1585.77	0.9	529.597	3	23.18	3895	4	588	600	Carbamidomethylation
P02787|TRFE_HUMAN	K.C(+57.02)DEWSVNSVGKIEC(+57.02)VSAETTEDC(+57.02)IAK.I	Y	66.95	2986.3	3.7	996.444	3	51.78	12258	2	374	399	Carbamidomethylation
P02787|TRFE_HUMAN	R.EGTC(+57.02)PEAPTDEC(+57.02)KPVK.W	Y	64.84	1816.8	0.8	909.407	2	20.76	3169	4	347	362	Carbamidomethylation
P02787|TRFE_HUMAN	K.DLLFRDDTVC(+57.02)LAK.L	Y	64.37	1564.79	0.6	783.404	2	50.48	11892	4	647	659	Carbamidomethylation
P02787|TRFE_HUMAN	K.ADRDQYELLC(+57.02)LDNTR.K	Y	63.35	1880.87	-0.2	627.963	3	45.22	10385	3	237	251	Carbamidomethylation
P02787|TRFE_HUMAN	K.DSGFQM(+15.99)NQLR.G	Y	63.26	1210.54	2.2	606.279	2	26.54	4909	2	123	132	Oxidation (M)
P02787|TRFE_HUMAN	R.KC(+57.02)STSSLLEAC(+57.02)TFR.R	Y	62.34	1658.78	1.3	553.933	3	40.21	8924	1	683	696	Carbamidomethylation
P02787|TRFE_HUMAN	K.DSAHGFLK.V	Y	60.15	873.434	0.8	437.725	2	24.35	4251	2	316	323
P02787|TRFE_HUMAN	K.ASYLDC(+57.02)IR.A	Y	59.57	996.47	1.7	499.243	2	37.78	8219	2	62	69	Carbamidomethylation
P02787|TRFE_HUMAN	K.KSASDLTWDNLK.G	Y	59.18	1376.69	0.5	689.354	2	38.8	8515	4	453	464
P02787|TRFE_HUMAN	R.LKC(+57.02)DEWSVNSVGK.I	Y	57.98	1520.73	1.7	507.918	3	33.49	6961	2	372	384	Carbamidomethylation
P02787|TRFE_HUMAN	K.WC(+57.02)ALSHHER.L	Y	57.77	1194.54	1.5	598.276	2	18.54	2519	4	363	371	Carbamidomethylation
P02787|TRFE_HUMAN	R.SM(+15.99)GGKEDLIWELLNQAQEHFGK.D	Y	57.4	2545.23	2.3	849.418	3	72	17911	3	274	295	Oxidation (M)
P02787|TRFE_HUMAN	R.LKC(+57.02)DEWSVNSVGKIEC(+57.02)VSAETTEDC(+57.02)IAK.I	Y	56.97	3227.48	1.4	807.878	4	49.46	11605	2	372	399	Carbamidomethylation
P02787|TRFE_HUMAN	K.YLGEEYVK.A	Y	56.44	999.491	0.5	500.753	2	35.57	7565	2	669	676
P02787|TRFE_HUMAN	K.INHC(+57.02)RFDEFFSEGC(+57.02)APGSK.K	Y	56.38	2256.97	3.3	753.332	3	43.14	9782	2	490	508	Carbamidomethylation
P02787|TRFE_HUMAN	R.APNHAVVTR.K	Y	56.37	963.525	1.1	482.77	2	13.99	1182	1	601	609
P02787|TRFE_HUMAN	K.SVIPSDGPSVAC(+57.02)VKK.A	Y	55.8	1542.81	2	772.413	2	32	6529	4	47	61	Carbamidomethylation
P02787|TRFE_HUMAN	K.ADRDQYELLC(+57.02)LDNTRKPVDEYK.D	Y	54.78	2740.31	1.5	914.446	3	41.6	9327	4	237	258	Carbamidomethylation
P02787|TRFE_HUMAN	K.KASYLDC(+57.02)IR.A	Y	50.57	1124.56	0.5	375.862	3	31.13	6269	3	61	69	Carbamidomethylation
P02787|TRFE_HUMAN	K.DYELLC(+57.02)LDGTRKPVEEYANC(+57.02)HLAR.A	Y	50	2921.38	1.4	731.353	4	47.96	11183	5	577	600	Carbamidomethylation
P02787|TRFE_HUMAN	K.NPDPWAK.N	Y	43.96	826.397	1.6	414.207	2	26.93	5026	2	565	571
P02787|TRFE_HUMAN	K.KDSGFQM(+15.99)NQLR.G	Y	39.46	1338.63	2	670.326	2	21.46	3376	1	122	132	Oxidation (M)
P02787|TRFE_HUMAN	K.KDSGFQMNQLR.G	Y	38.6	1322.64	5.2	441.89	3	32.15	6573	1	122	132
P02787|TRFE_HUMAN	K.EDPQTFYYAVAVVKK.D	Y	36.29	1756.9	1.6	586.643	3	49.15	11517	2	108	122
P01009|A1AT_HUMAN	K.LYHSEAFTVNFGDTEEAK.K	Y	105.24	2056.94	1.9	1029.48	2	46.03	10620	18	161	178
P01009|A1AT_HUMAN	K.VFSNGADLSGVTEEAPLK.L	Y	100.03	1832.92	1	917.466	2	46.5	10758	5	335	352
P01009|A1AT_HUMAN	K.KLYHSEAFTVNFGDTEEAK.K	Y	98.29	2185.03	2.2	1093.53	2	41.78	9377	13	160	178
P01009|A1AT_HUMAN	R.TLNQPDSQLQLTTGNGLFLSEGLK.L	Y	93.84	2573.33	1.4	1287.68	2	61.75	15062	15	126	149
P01009|A1AT_HUMAN	K.LQHLENELTHDIITK.F	Y	92.13	1802.95	1.1	902.485	2	41.04	9162	16	284	298
P01009|A1AT_HUMAN	K.GTEAAGAM(+15.99)FLEAIPMSIPPEVK.F	Y	89.57	2274.13	1.9	1138.07	2	68.81	17035	20	368	389	Oxidation (M)
P01009|A1AT_HUMAN	K.DTEEEDFHVDQVTTVK.V	Y	86.79	1890.85	2	946.433	2	37.99	8280	15	226	241
P01009|A1AT_HUMAN	K.GTEAAGAMFLEAIPMSIPPEVK.F	Y	85.73	2258.13	1.4	1130.08	2	72.54	18059	16	368	389
P01009|A1AT_HUMAN	K.GTEAAGAM(+15.99)FLEAIPM(+15.99)SIPPEVK.F	Y	84.73	2290.12	2.2	1146.07	2	64.23	15757	37	368	389	Oxidation (M)
P01009|A1AT_HUMAN	K.ITPNLAEFAFSLYR.Q	Y	84.56	1640.86	1.1	821.436	2	74.31	18508	28	50	63
P01009|A1AT_HUMAN	K.FNKPFVFLMIEQNTK.S	Y	84.3	1854.97	1.9	928.494	2	63.4	15526	7	390	404
P01009|A1AT_HUMAN	K.KLYHSEAFTVNFGDTEEAKK.Q	Y	84.22	2313.13	1.5	1157.57	2	38.24	8356	14	160	179
P01009|A1AT_HUMAN	K.GTEAAGAMFLEAIPM(+15.99)SIPPEVK.F	Y	82.78	2274.13	1.9	1138.07	2	66.56	16406	12	368	389	Oxidation (M)
P01009|A1AT_HUMAN	K.TDTSHHDQDHPTFNK.I	Y	81.2	1778.76	0.8	890.388	2	14.93	1459	9	35	49
P01009|A1AT_HUMAN	K.GKWERPFEVKDTEEEDFHVDQVTTVK.V	Y	75.65	3147.51	2	1050.18	3	43.19	9797	73	216	241
P01009|A1AT_HUMAN	K.FNKPFVFLM(+15.99)IEQNTK.S	Y	75.12	1870.97	1.6	936.491	2	56	13447	17	390	404	Oxidation (M)
P01009|A1AT_HUMAN	K.ELDRDTVFALVNYIFFK.G	Y	73.68	2089.09	2.3	1045.55	2	88.16	20873	4	199	215
P01009|A1AT_HUMAN	K.LSSWVLLMK.Y	Y	69.38	1075.61	1.7	538.813	2	60.24	14642	2	259	267
P01009|A1AT_HUMAN	K.SVLGQLGITK.V	Y	67.68	1014.61	-0.3	508.311	2	47.37	11009	5	325	334
P01009|A1AT_HUMAN	K.WERPFEVKDTEEEDFHVDQVTTVK.V	Y	67.65	2962.4	2.8	988.476	3	45.88	10576	5	218	241
P01009|A1AT_HUMAN	R.LGM(+15.99)FNIQHC(+57.02)K.K	Y	66.18	1262.59	1.4	632.303	2	29.33	5740	10	248	257	Oxidation (M); Carbamidomethylation
P01009|A1AT_HUMAN	K.RLGMFNIQHC(+57.02)K.K	Y	63.2	1402.7	3.1	468.574	3	32.97	6809	4	247	257	Carbamidomethylation
P01009|A1AT_HUMAN	K.LSSWVLLM(+15.99)K.Y	Y	62.04	1091.6	1.5	546.811	2	54.97	13152	12	259	267	Oxidation (M)
P01009|A1AT_HUMAN	K.LSITGTYDLK.S	Y	61.83	1109.6	0.1	555.806	2	42.61	9623	18	315	324
P01009|A1AT_HUMAN	K.GKWERPFEVK.D	Y	60.65	1274.68	1.3	638.347	2	30.98	6224	4	216	225
P01009|A1AT_HUMAN	K.KLSSWVLLMK.Y	Y	60.02	1203.7	1	602.86	2	54.06	12899	4	258	267
P01009|A1AT_HUMAN	K.AVLTIDEK.G	Y	59.84	887.496	0.5	444.756	2	30.98	6221	2	360	367
P01009|A1AT_HUMAN	K.KLSSWVLLM(+15.99)K.Y	Y	58.84	1219.7	1.6	610.858	2	46.57	10779	8	258	267	Oxidation (M)
P01009|A1AT_HUMAN	K.KQINDYVEK.G	Y	58.64	1135.59	1.3	568.802	2	21.29	3323	4	179	187
P01009|A1AT_HUMAN	K.LVDKFLEDVKK.L	Y	57.21	1332.77	1.6	667.391	2	36.82	7940	3	150	160
P01009|A1AT_HUMAN	R.SASLHLPK.L	Y	56.8	851.486	2.1	426.751	2	26.72	4961	2	307	314
P01009|A1AT_HUMAN	K.SPLFM(+15.99)GK.V	Y	56.08	794.4	2.4	398.208	2	31.62	6416	15	405	411	Oxidation (M)
P01009|A1AT_HUMAN	R.LGMFNIQHC(+57.02)K.K	Y	55.54	1246.6	1.3	416.539	3	38.07	8303	2	248	257	Carbamidomethylation
P01009|A1AT_HUMAN	R.DTVFALVNYIFFK.G	Y	54.83	1575.83	1.3	788.925	2	90.24	21117	1	203	215
P01009|A1AT_HUMAN	K.RLGM(+15.99)FNIQHC(+57.02)K.K	Y	54.29	1418.69	1.7	473.905	3	27.72	5256	14	247	257	Oxidation (M); Carbamidomethylation
P01009|A1AT_HUMAN	K.LYHSEAFTVNFGDTEEAKK.Q	Y	53.32	2185.03	2.1	729.353	3	44.08	10051	24	161	179
P01009|A1AT_HUMAN	K.LVDKFLEDVK.K	Y	52.92	1204.67	1.8	603.343	2	42.28	9522	4	150	159
P01009|A1AT_HUMAN	K.SPLFMGK.V	Y	51.39	778.405	2.3	390.211	2	35.78	7628	2	405	411
P01009|A1AT_HUMAN	K.QINDYVEK.G	Y	50.47	1007.49	1.5	504.754	2	24.35	4248	6	180	187
P01009|A1AT_HUMAN	K.RLGM(+15.99)FNIQHC(+57.02)KK.L	Y	49.88	1546.79	2.2	516.604	3	22.14	3576	7	247	258	Oxidation (M); Carbamidomethylation
P01009|A1AT_HUMAN	K.FLENEDR.R	Y	48.23	921.419	2.5	461.718	2	22.28	3617	2	299	305
P01009|A1AT_HUMAN	R.LGM(+15.99)FNIQHC(+57.02)KK.L	Y	47.78	1390.68	1.6	696.351	2	24.32	4243	8	248	258	Oxidation (M); Carbamidomethylation
P01009|A1AT_HUMAN	K.VVNPTQK	N	47.31	784.444	0.4	393.23	2	14.58	1354	2	412	418
P01009|A1AT_HUMAN	K.VFSNGADLSGVTEEAPLKLSK.A	Y	43.88	2161.13	1.6	721.384	3	49.08	11500	2	335	355
P01009|A1AT_HUMAN	K.WERPFEVK.D	Y	42.12	1089.56	0.8	545.788	2	35.36	7503	6	218	225
P01009|A1AT_HUMAN	K.FLEDVKK.L	Y	41.27	877.491	0.2	439.753	2	23.24	3912	2	154	160
P01009|A1AT_HUMAN	K.FLEDVK.K	N	40.64	749.396	1.8	375.706	2	29.26	5717	2	154	159
P01009|A1AT_HUMAN	K.LSITGTYDLKSVLGQLGITK.V	Y	40.28	2106.19	2.8	703.074	3	70.07	17381	1	315	334
P01009|A1AT_HUMAN	K.FLENEDRR.S	Y	40.1	1077.52	0.5	539.768	2	18.86	2611	8	299	306
P01009|A1AT_HUMAN	K.RLGMFNIQHC(+57.02)KK.L	Y	39.33	1530.79	2	511.272	3	27.73	5262	3	247	258	Carbamidomethylation
P01009|A1AT_HUMAN	R.LGMFNIQHC(+57.02)KK.L	Y	37.05	1374.69	1.2	459.238	3	32.04	6539	1	248	258	Carbamidomethylation
P01024|CO3_HUMAN	R.VPVAVQGEDTVQSLTQGDGVAK.L	Y	100.15	2197.12	0.4	1099.57	2	47.69	11105	3	387	408
P01024|CO3_HUMAN	R.AYYENSPQQVFSTEFEVK.E	Y	86.83	2165	2.1	1083.51	2	55.95	13435	5	208	225
P01024|CO3_HUMAN	K.EYVLPSFEVIVEPTEK.F	Y	85.3	1877.97	1.5	939.992	2	64.84	15925	3	226	241
P01024|CO3_HUMAN	R.IPIEDGSGEVVLSR.K	Y	85.01	1469.77	1.3	735.894	2	41.48	9291	2	291	304
P01024|CO3_HUMAN	R.TVM(+15.99)VNIENPEGIPVK.Q	Y	84.61	1654.86	1.3	828.438	2	44.72	10238	2	162	176	Oxidation (M)
P01024|CO3_HUMAN	K.DYAGVFSDAGLTFTSSSGQQTAQR.A	Y	84.13	2493.14	0.8	832.055	3	57.66	13920	2	634	657
P01024|CO3_HUMAN	R.LVAYYTLIGASGQR.E	Y	80.85	1510.81	1	756.415	2	51.98	12315	4	531	544
P01024|CO3_HUMAN	R.SYTVAIAGYALAQM(+15.99)GR.L	Y	79.13	1686.84	1.6	844.429	2	51.05	12057	1	1186	1201	Oxidation (M)
P01024|CO3_HUMAN	R.SNLDEDIIAEENIVSR.S	Y	77.63	1815.88	1.6	908.951	2	54.08	12907	7	749	764
P01024|CO3_HUMAN	R.SGIPIVTSPYQIHFTK.T	Y	76.71	1786.96	2.4	894.49	2	53.42	12723	4	344	359
P01024|CO3_HUMAN	K.TIYTPGSTVLYR.I	Y	76.51	1369.72	1.3	685.87	2	43.27	9818	2	137	148
P01024|CO3_HUMAN	R.TVMVNIENPEGIPVK.Q	Y	76.37	1638.87	1.2	820.441	2	48.42	11313	2	162	176
P01024|CO3_HUMAN	K.VLLDGVQNPR.A	Y	75.16	1109.62	1.3	555.818	2	34.05	7127	2	306	315
P01024|CO3_HUMAN	K.KVEGTAFVIFGIQDGEQR.I	Y	74.34	1993.03	1.3	665.35	3	56.15	13491	2	264	281
P01024|CO3_HUMAN	R.EVVADSVWVDVK.D	Y	73.09	1344.69	1	673.354	2	49.07	11496	1	545	556
P01024|CO3_HUMAN	K.AGDFLEANYM(+15.99)NLQR.S	Y	72.58	1656.76	0.8	829.386	2	46.76	10836	2	1172	1185	Oxidation (M)
P01024|CO3_HUMAN	K.KQELSEAEQATR.T	Y	71.23	1388.69	1.8	695.353	2	18.79	2590	4	428	439
P01024|CO3_HUMAN	K.ADIGC(+57.02)TPGSGK.D	Y	71.09	1061.48	1.8	531.749	2	17.52	2215	1	623	633	Carbamidomethylation
P01024|CO3_HUMAN	K.DFDFVPPVVR.W	Y	69.97	1189.61	2	595.815	2	58.76	14226	2	1245	1254
P01024|CO3_HUMAN	K.AGDFLEANYMNLQR.S	Y	69.32	1640.76	1.6	821.389	2	53.25	12674	1	1172	1185
P01024|CO3_HUMAN	K.RIPIEDGSGEVVLSR.K	Y	68.77	1625.87	1.7	542.966	3	39.23	8637	4	290	304
P01024|CO3_HUMAN	K.SSLSVPYVIVPLK.T	Y	68.03	1400.83	1.5	701.422	2	60.47	14709	2	892	904
P01024|CO3_HUMAN	K.DSC(+57.02)VGSLVVK.S	Y	67.18	1062.54	1.4	532.277	2	34.55	7271	2	557	566	Carbamidomethylation
P01024|CO3_HUMAN	R.TM(+15.99)QALPYSTVGNSNNYLHLSVLR.T	Y	66.1	2593.3	2.1	865.441	3	55.43	13287	2	440	462	Oxidation (M)
P01024|CO3_HUMAN	K.ENEGFTVTAEGK.G	Y	65.38	1280.59	1.6	641.303	2	29.57	5812	1	1326	1337
P01024|CO3_HUMAN	K.QELSEAEQATR.T	Y	63	1260.59	1.1	631.305	2	22.08	3559	2	429	439
P01024|CO3_HUMAN	K.TGLQEVEVK.A	Y	62.16	1001.54	3.5	501.779	2	29.69	5845	2	905	913
P01024|CO3_HUMAN	R.ILLQGTPVAQMTEDAVDAER.L	Y	61.48	2156.08	3.6	1079.05	2	61.13	14891	1	980	999
P01024|CO3_HUMAN	K.FYYIYNEK.G	Y	60.93	1138.53	1.1	570.275	2	40.9	9121	2	242	249
P01024|CO3_HUMAN	R.ILLQGTPVAQM(+15.99)TEDAVDAER.L	Y	60.83	2172.07	2.2	725.033	3	48.81	11421	2	980	999	Oxidation (M)
P01024|CO3_HUMAN	R.EPGQDLVVLPLSITTDFIPSFR.L	Y	56.42	2443.3	0.6	1222.66	2	85.91	20598	4	509	530
P01024|CO3_HUMAN	K.IRYYTYLIM(+15.99)NK.G	Y	51.49	1492.77	1.6	498.6	3	42.09	9468	2	487	497	Oxidation (M)
P01024|CO3_HUMAN	R.VVLVAVDK.G	Y	51.36	841.527	0.1	421.771	2	33.19	6873	2	593	600
P01024|CO3_HUMAN	R.IPIEDGSGEVVLSRK.V	Y	51.14	1597.87	1	533.63	3	36.51	7849	1	291	305
P01024|CO3_HUMAN	R.LESEETM(+15.99)VLEAHDAQGDVPVTVTVHDFPGK.K	Y	50.85	3265.54	1.2	817.394	4	48.42	11311	2	36	65	Oxidation (M)
P01024|CO3_HUMAN	K.SGQSEDRQPVPGQQM(+15.99)TLK.I	Y	49.47	2000.96	1.5	667.994	3	21.6	3417	2	567	584	Oxidation (M)
P01024|CO3_HUMAN	R.QVREPGQDLVVLPLSITTDFIPSFR.L	Y	48.7	2826.53	3	943.186	3	80.24	19805	2	506	530
P01024|CO3_HUMAN	K.AAVYHHFISDGVRK.S	Y	48.24	1598.83	0.4	533.951	3	24.66	4346	2	914	927
P01024|CO3_HUMAN	K.VHQYFNVELIQPGAVK.V	Y	47.74	1840.98	3.4	614.67	3	51.79	12263	1	1463	1478
P01024|CO3_HUMAN	K.IRAYYENSPQQVFSTEFEVK.E	Y	47.52	2434.18	0.5	812.401	3	53.41	12721	1	206	225
P01024|CO3_HUMAN	K.VSHSEDDC(+57.02)LAFK.V	Y	47.12	1406.61	1.9	469.879	3	28.96	5630	1	1451	1462	Carbamidomethylation
P01024|CO3_HUMAN	R.ISLPESLK.R	Y	46.6	885.517	1.6	443.767	2	40.82	9099	2	282	289
P01024|CO3_HUMAN	R.APSTWLTAYVVK.V	Y	44.79	1334.72	1.3	668.37	2	56.93	13714	1	1073	1084
P01024|CO3_HUMAN	R.AVLYNYR.Q	Y	43.27	897.471	1.1	449.743	2	30.44	6063	1	849	855
P01024|CO3_HUMAN	R.AEDLVGK.S	Y	40.02	730.386	0.4	366.2	2	18.75	2581	1	316	322
P01024|CO3_HUMAN	K.RQGALELIKK.G	Y	39.88	1154.71	-0.2	385.912	3	25.9	4716	2	1042	1051
P01024|CO3_HUMAN	K.VLLDGVQNPRAEDLVGK.S	Y	39.35	1821.99	3.3	608.341	3	43.06	9758	2	306	322
P01024|CO3_HUMAN	K.GVFVLNKK.N	Y	38	903.554	1.2	452.785	2	28.81	5582	1	601	608
P01024|CO3_HUMAN	K.LM(+15.99)NIFLK.D	Y	37.41	893.505	1.7	447.76	2	45.47	10461	2	790	796	Oxidation (M)
P01024|CO3_HUMAN	R.TMQALPYSTVGNSNNYLHLSVLR.T	Y	36.77	2577.3	-0.7	860.107	3	58.01	14015	2	440	462
P01024|CO3_HUMAN	R.WLNEQR.Y	Y	35.92	844.419	1	423.217	2	24.57	4319	2	1255	1260
P01024|CO3_HUMAN	K.QKPDGVFQEDAPVIHQEM(+15.99)IGGLR.N	Y	34.96	2579.28	2.1	645.829	4	44.66	10223	2	1112	1134	Oxidation (M)
P01024|CO3_HUMAN	K.LSINTHPSQKPLSITVR.T	Y	34.22	1890.07	1	473.525	4	37.91	8258	2	409	425
P01024|CO3_HUMAN	R.ILLQGTPVAQM(+15.99)TEDAVDAERLK.H	Y	33.36	2413.25	1	805.426	3	50.14	11797	2	980	1001	Oxidation (M)
P01024|CO3_HUMAN	R.KVLLDGVQNPRAEDLVGK.S	Y	32.41	1950.09	1.4	651.038	3	39.21	8634	1	305	322
P01024|CO3_HUMAN	K.WLILEK.Q	Y	31.97	800.48	-0.4	401.247	2	49.38	11584	1	1106	1111
P01024|CO3_HUMAN	R.ILLQGTPVAQMTEDAVDAERLK.H	Y	29.38	2397.26	0.9	800.094	3	61.7	15049	1	980	1001
P01024|CO3_HUMAN	K.VEGTAFVIFGIQDGEQR.I	Y	26.82	1864.93	1.7	622.652	3	65.84	16208	1	265	281
P02774|VTDB_HUMAN	K.SYLSMVGSC(+57.02)C(+57.02)TSASPTVC(+57.02)FLK.E	Y	100.33	2354.04	2.7	1178.03	2	58.16	14060	4	181	201	Carbamidomethylation
P02774|VTDB_HUMAN	K.GQELC(+57.02)ADYSENTFTEYKK.K	Y	95.33	2181.95	1.8	1091.99	2	38.47	8423	4	403	420	Carbamidomethylation
P02774|VTDB_HUMAN	K.SYLSM(+15.99)VGSC(+57.02)C(+57.02)TSASPTVC(+57.02)FLK.E	Y	94.6	2370.04	3.3	1186.03	2	53.4	12714	7	181	201	Oxidation (M); Carbamidomethylation
P02774|VTDB_HUMAN	K.GQELC(+57.02)ADYSENTFTEYK.K	Y	92.41	2053.86	2.2	1027.94	2	43.4	9856	5	403	419	Carbamidomethylation
P02774|VTDB_HUMAN	K.SLGEC(+57.02)C(+57.02)DVEDSTTC(+57.02)FNAK.G	Y	86.56	2091.82	2.3	1046.92	2	36.56	7860	2	371	388	Carbamidomethylation
P02774|VTDB_HUMAN	K.EVVSLTEAC(+57.02)C(+57.02)AEGADPDC(+57.02)YDTR.T	Y	86.05	2517.01	3.4	1259.52	2	42.22	9508	4	66	87	Carbamidomethylation
P02774|VTDB_HUMAN	K.SC(+57.02)ESNSPFPVHPGTAEC(+57.02)C(+57.02)TK.E	Y	85.71	2263.93	1.9	1132.97	2	32.8	6763	5	95	114	Carbamidomethylation
P02774|VTDB_HUMAN	K.ELSSFIDKGQELC(+57.02)ADYSENTFTEYK.K	Y	82.54	2973.32	2.1	992.117	3	55.86	13408	2	395	419	Carbamidomethylation
P02774|VTDB_HUMAN	K.FPSGTFEQVSQLVK.E	Y	80.92	1565.81	0.8	783.912	2	56.02	13452	2	52	65
P02774|VTDB_HUMAN	K.HLSLLTTLSNR.V	Y	79.42	1253.71	1.1	627.863	2	44.57	10190	4	208	218
P02774|VTDB_HUMAN	K.HQPQEFPTYVEPTNDEIC(+57.02)EAFR.K	Y	79.02	2706.2	1.1	903.076	3	53.16	12648	3	128	149	Carbamidomethylation
P02774|VTDB_HUMAN	R.KFPSGTFEQVSQLVK.E	Y	78.41	1693.9	1.6	847.961	2	51.17	12088	10	51	65
P02774|VTDB_HUMAN	K.RSDFASNC(+57.02)C(+57.02)SINSPPLYC(+57.02)DSEIDAELK.N	Y	75.38	3147.36	2.8	1050.13	3	50.46	11888	5	445	471	Carbamidomethylation
P02774|VTDB_HUMAN	K.TAM(+15.99)DVFVC(+57.02)TYFM(+15.99)PAAQLPELPDVELPTNK.D	Y	72.52	3328.57	1.7	1110.53	3	72.14	17951	3	304	332	Oxidation (M); Carbamidomethylation
P02774|VTDB_HUMAN	R.SDFASNC(+57.02)C(+57.02)SINSPPLYC(+57.02)DSEIDAELK.N	Y	72.11	2991.26	1.9	998.095	3	54.16	12929	2	446	471	Carbamidomethylation
P02774|VTDB_HUMAN	K.EFSHLGKEDFTSLSLVLYSR.K	Y	70.78	2327.18	0.8	776.734	3	59.72	14499	3	31	50
P02774|VTDB_HUMAN	R.RTHLPEVFLSK.V	Y	70.37	1325.75	1.2	663.881	2	37.7	8197	4	353	363
P02774|VTDB_HUMAN	R.VC(+57.02)SQYAAYGEK.K	Y	70.27	1274.56	1	638.288	2	23.73	4060	2	219	229	Carbamidomethylation
P02774|VTDB_HUMAN	R.VC(+57.02)SQYAAYGEKK.S	Y	69.83	1402.65	1.5	468.56	3	19.94	2924	3	219	230	Carbamidomethylation
P02774|VTDB_HUMAN	K.C(+57.02)C(+57.02)ESASEDC(+57.02)MAK.E	Y	69.12	1446.49	1.1	724.252	2	16.88	2024	2	265	276	Carbamidomethylation
P02774|VTDB_HUMAN	K.DVC(+57.02)DPGNTK.V	Y	67.54	1004.42	0.5	503.219	2	14.93	1457	2	333	341	Carbamidomethylation
P02774|VTDB_HUMAN	R.THLPEVFLSK.V	Y	66.81	1169.64	3.5	585.832	2	42.97	9728	2	354	363
P02774|VTDB_HUMAN	K.EYANQFM(+15.99)WEYSTNYGQAPLSLLVSYTK.S	Y	65.46	3218.49	0.3	1073.84	3	74.79	18630	2	154	180	Oxidation (M)
P02774|VTDB_HUMAN	K.HLSLLTTLSNRVC(+57.02)SQYAAYGEK.K	Y	65.31	2510.26	0.9	628.572	4	53.32	12692	4	208	229	Carbamidomethylation
P02774|VTDB_HUMAN	K.EDFTSLSLVLYSR.K	Y	63.1	1528.78	0.7	510.6	3	63.48	15547	3	38	50
P02774|VTDB_HUMAN	K.NSKFEDC(+57.02)C(+57.02)QEK.T	Y	63.09	1443.58	1.2	722.796	2	15.17	1528	4	293	303	Carbamidomethylation
P02774|VTDB_HUMAN	K.C(+57.02)C(+57.02)ESASEDC(+57.02)M(+15.99)AK.E	Y	62.56	1462.48	0.7	732.25	2	13.48	1036	4	265	276	Carbamidomethylation; Oxidation (M)
P02774|VTDB_HUMAN	K.LC(+57.02)DNLSTK.N	Y	61.49	949.454	1.3	475.735	2	21.36	3344	2	285	292	Carbamidomethylation
P02774|VTDB_HUMAN	K.HQPQEFPTYVEPTNDEIC(+57.02)EAFRK.D	Y	60.81	2834.3	1.9	945.775	3	49.14	11516	3	128	150	Carbamidomethylation
P02774|VTDB_HUMAN	K.LAQKVPTADLEDVLPLAEDITNILSK.C	Y	57.52	2805.54	-0.3	936.186	3	85.29	20527	4	239	264
P02774|VTDB_HUMAN	K.TAM(+15.99)DVFVC(+57.02)TYFMPAAQLPELPDVELPTNK.D	Y	56.6	3312.58	1.6	1105.2	3	76.23	18997	2	304	332	Oxidation (M); Carbamidomethylation
P02774|VTDB_HUMAN	K.VM(+15.99)DKYTFELSR.R	Y	54.5	1403.68	1.3	468.9	3	36.7	7903	3	342	352	Oxidation (M)
P02774|VTDB_HUMAN	K.YTFELSR.R	Y	54.38	914.45	0.9	458.233	2	39.45	8699	2	346	352
P02774|VTDB_HUMAN	K.KELSSFIDK.G	Y	50.83	1065.57	0.9	533.793	2	31.76	6456	3	394	402
P02774|VTDB_HUMAN	K.AKLPDATPK.E	Y	50.82	939.539	1.4	470.777	2	18.79	2592	2	428	436
P02774|VTDB_HUMAN	K.VPTADLEDVLPLAEDITNILSK.C	Y	50.34	2365.26	1.7	1183.64	2	91.1	21229	4	243	264
P02774|VTDB_HUMAN	K.ELSSFIDK.G	Y	46.55	937.476	0.9	469.745	2	37.71	8198	2	395	402
P02774|VTDB_HUMAN	K.ELPEHTVK.L	Y	46.51	951.503	0.5	476.759	2	16.8	2001	2	277	284
P02774|VTDB_HUMAN	K.VLEPTLK.S	Y	44.43	798.485	0.8	400.25	2	30.05	5948	2	364	370
P02774|VTDB_HUMAN	K.LC(+57.02)M(+15.99)AALK.H	Y	44.08	821.414	1.1	411.715	2	20.67	3136	7	121	127	Carbamidomethylation; Oxidation (M)
P02774|VTDB_HUMAN	K.EYANQFMWEYSTNYGQAPLSLLVSYTK.S	Y	43.19	3202.5	2.8	1068.51	3	78.29	19438	3	154	180
P02774|VTDB_HUMAN	K.LC(+57.02)MAALK.H	Y	42.93	805.419	1.4	403.717	2	34.12	7146	2	121	127	Carbamidomethylation
P02774|VTDB_HUMAN	R.KLC(+57.02)MAALK.H	Y	42.9	933.514	1.2	467.765	2	28.79	5573	2	120	127	Carbamidomethylation
P02774|VTDB_HUMAN	K.HQPQEFPTYVEPTNDEIC(+57.02)EAFRKDPK.E	Y	40.71	3174.47	2.3	794.627	4	47.03	10911	2	128	153	Carbamidomethylation
P02774|VTDB_HUMAN	R.KLC(+57.02)M(+15.99)AALK.H	Y	40.48	949.509	1.3	475.762	2	17.87	2316	2	120	127	Carbamidomethylation; Oxidation (M)
P02774|VTDB_HUMAN	K.FEDC(+57.02)C(+57.02)QEK.T	Y	39.05	1114.41	0.5	558.211	2	15.51	1623	2	296	303	Carbamidomethylation
P02774|VTDB_HUMAN	K.SRLSNLIK.L	Y	37.78	929.566	1.3	465.791	2	30.34	6033	2	231	238
P02774|VTDB_HUMAN	K.YTFELSRR.T	Y	31.69	1070.55	0.9	536.283	2	33.35	6918	4	346	353
P02774|VTDB_HUMAN	K.TAMDVFVC(+57.02)TYFM(+15.99)PAAQLPELPDVELPTNK.D	Y	31.34	3312.58	-2.3	1105.2	3	76.79	19115	2	304	332	Carbamidomethylation; Oxidation (M)
P02774|VTDB_HUMAN	K.ERLQLK.H	Y	27.48	785.476	0.4	393.745	2	19.28	2735	2	202	207
P04264|K2C1_HUMAN	R.FSSC(+57.02)GGGGGSFGAGGGFGSR.S	Y	94.24	1764.73	1.6	883.372	2	36.5	7846	2	46	65	Carbamidomethylation
P04264|K2C1_HUMAN	R.GGGGGGYGSGGSSYGSGGGSYGSGGGGGGGR.G	Y	86.88	2382.94	1.5	1192.48	2	22.38	3650	4	519	549
P04264|K2C1_HUMAN	K.QISNLQQSISDAEQR.G	Y	85.18	1715.84	2	858.931	2	40.28	8942	4	418	432
P04264|K2C1_HUMAN	K.WELLQQVDTSTR.T	Y	84.64	1474.74	1	738.379	2	51.6	12206	3	212	223
P04264|K2C1_HUMAN	R.SGGGFSSGSAGIINYQR.R	Y	83.71	1656.79	1.8	829.402	2	39.97	8851	2	13	29
P04264|K2C1_HUMAN	K.NKLNDLEDALQQAK.E	Y	83.54	1598.83	0.8	800.421	2	46.95	10888	4	442	455
P04264|K2C1_HUMAN	R.SLDLDSIIAEVK.A	Y	81.61	1301.71	1.7	651.862	2	65.58	16133	5	344	355
P04264|K2C1_HUMAN	K.LNDLEDALQQAK.E	Y	80.89	1356.69	0	679.351	2	44.7	10232	2	444	455
P04264|K2C1_HUMAN	K.AEAESLYQSK.Y	Y	79.89	1124.53	2	563.276	2	23.45	3975	2	367	376
P04264|K2C1_HUMAN	K.SKAEAESLYQSKYEELQITAGR.H	Y	79.72	2500.24	1.4	834.423	3	41.85	9398	4	365	386
P04264|K2C1_HUMAN	K.SKAEAESLYQSK.Y	Y	78.42	1339.66	1.4	670.839	2	20.68	3141	4	365	376
P04264|K2C1_HUMAN	R.FLEQQNQVLQTK.W	N	77.53	1474.78	0.6	738.397	2	35.12	7435	3	200	211
P04264|K2C1_HUMAN	K.LALDLEIATYR.T	N	76.2	1276.7	1.7	639.36	2	57.26	13802	3	473	483
P04264|K2C1_HUMAN	K.SLNNQFASFIDK.V	Y	75.11	1382.68	1.9	692.35	2	52.64	12500	2	186	197
P04264|K2C1_HUMAN	K.YEELQITAGR.H	N	73.08	1178.59	1.5	590.305	2	35.99	7692	2	377	386
P04264|K2C1_HUMAN	R.LLRDYQELMNTK.L	Y	73.03	1522.78	0.9	762.399	2	41.06	9170	4	461	472
P04264|K2C1_HUMAN	R.TNAENEFVTIKK.D	Y	71.03	1392.72	2.2	697.371	2	30.71	6141	4	278	289
P04264|K2C1_HUMAN	K.VRFLEQQNQVLQTK.W	N	70.42	1729.95	0.6	865.982	2	37.5	8138	3	198	211
P04264|K2C1_HUMAN	R.THNLEPYFESFINNLR.R	Y	69.22	1992.97	0	665.33	3	67.33	16621	2	224	239
P04264|K2C1_HUMAN	K.AEAESLYQSKYEELQITAGR.H	Y	68.95	2285.12	1.7	762.714	3	44.89	10289	2	367	386
P04264|K2C1_HUMAN	K.AQYEDIAQK.S	Y	67.07	1064.51	0.3	533.264	2	22.69	3743	2	356	364
P04264|K2C1_HUMAN	K.DVDGAYMTK.V	Y	66.76	998.438	1.1	500.227	2	24.69	4353	2	290	298
P04264|K2C1_HUMAN	K.DVDGAYM(+15.99)TK.V	Y	66.04	1014.43	1	508.224	2	17.94	2337	4	290	298	Oxidation (M)
P04264|K2C1_HUMAN	R.MSGEC(+57.02)APNVSVSVSTSHTTISGGGSR.G	Y	65.75	2564.16	1.2	855.728	3	35.08	7422	2	493	518	Carbamidomethylation
P04264|K2C1_HUMAN	R.M(+15.99)SGEC(+57.02)APNVSVSVSTSHTTISGGGSR.G	Y	64.28	2580.15	1	861.06	3	33.27	6895	2	493	518	Oxidation (M); Carbamidomethylation
P04264|K2C1_HUMAN	R.SLVNLGGSK.S	Y	62.1	873.492	1.1	437.754	2	32.19	6583	2	66	74
P04264|K2C1_HUMAN	R.GSGGGSSGGSIGGR.G	Y	61.66	1091.5	1.5	546.756	2	13.41	1018	1	603	616
P04264|K2C1_HUMAN	K.RTNAENEFVTIKK.D	Y	61.3	1548.83	2	517.284	3	26.45	4880	3	277	289
P04264|K2C1_HUMAN	R.TLLEGEESR.M	Y	61.16	1032.51	1.3	517.262	2	26.02	4751	2	484	492
P04264|K2C1_HUMAN	K.LNDLEDALQQAKEDLAR.L	Y	60.69	1940.98	-2	971.495	2	61.26	14928	4	444	460
P04264|K2C1_HUMAN	R.NSKIEISELNR.V	Y	60.11	1301.69	0.5	651.855	2	31.2	6291	3	393	403
P04264|K2C1_HUMAN	R.NKYEDEINKR.T	N	59.87	1307.65	1.1	654.832	2	18.67	2557	4	268	277
P04264|K2C1_HUMAN	K.NKLNDLEDALQQAKEDLAR.L	Y	58.66	2183.12	0.8	728.714	3	60.63	14752	3	442	460
P04264|K2C1_HUMAN	R.LLRDYQELM(+15.99)NTK.L	Y	58	1538.78	1.3	770.396	2	31.52	6387	4	461	472	Oxidation (M)
P04264|K2C1_HUMAN	R.GSYGSGGSSYGSGGGSYGSGGGGGGHGSYGSGSSSGGYR.G	Y	57.33	3311.3	2	1104.78	3	25.12	4484	2	550	588
P04264|K2C1_HUMAN	K.NM(+15.99)QDMVEDYR.N	Y	57.14	1315.52	1.5	658.767	2	28.76	5568	2	258	267	Oxidation (M)
P04264|K2C1_HUMAN	K.KQISNLQQSISDAEQRGENALK.D	Y	56.11	2456.26	-1	819.76	3	47.49	11048	3	417	438
P04264|K2C1_HUMAN	K.SISISVAR.G	Y	55.52	831.481	2	416.749	2	32.32	6620	2	75	82
P04264|K2C1_HUMAN	K.NMQDM(+15.99)VEDYR.N	Y	53.6	1315.52	2.7	658.768	2	31.65	6426	1	258	267	Oxidation (M)
P04264|K2C1_HUMAN	R.NKYEDEINK.R	N	53.55	1151.55	1.5	576.781	2	18.81	2598	3	268	276
P04264|K2C1_HUMAN	K.IEISELNR.V	N	53.42	972.524	0.8	487.27	2	34.93	7376	2	396	403
P04264|K2C1_HUMAN	R.LRSEIDNVKK.Q	Y	53.05	1200.68	1.6	401.235	3	16.84	2013	3	408	417
P04264|K2C1_HUMAN	K.SDQSRLDSELK.N	Y	52.84	1276.63	1.2	426.55	3	24	4142	4	247	257
P04264|K2C1_HUMAN	K.NM(+15.99)QDM(+15.99)VEDYR.N	Y	50.98	1331.51	1.2	666.764	2	22.5	3689	2	258	267	Oxidation (M)
P04264|K2C1_HUMAN	K.KDVDGAYM(+15.99)TK.V	Y	49.4	1142.53	0.9	572.272	2	14.6	1362	1	289	298	Oxidation (M)
P04264|K2C1_HUMAN	K.QISNLQQSISDAEQRGENALK.D	Y	48.35	2328.17	1.5	777.064	3	52.24	12391	2	418	438
P04264|K2C1_HUMAN	R.LRSEIDNVK.K	Y	45.96	1072.59	0.8	537.302	2	20.45	3072	4	408	416
P04264|K2C1_HUMAN	R.THNLEPYFESFINNLRR.R	Y	45.46	2149.07	0.9	538.275	4	63.55	15567	4	224	240
P04264|K2C1_HUMAN	K.YEDEINKR.T	N	45.15	1065.51	0.9	533.762	2	15.95	1751	3	270	277
P04264|K2C1_HUMAN	R.GGSGGGGGGSSGGRGSGGGSSGGSIGGR.G	Y	44.34	2078.91	-0.2	693.976	3	13.34	997	2	589	616
P04264|K2C1_HUMAN	K.IEISELNRVIQR.L	N	31.67	1468.84	1.8	490.62	3	46.3	10697	2	396	407
P04264|K2C1_HUMAN	K.RTNAENEFVTIK.K	Y	30.76	1420.73	-1	711.372	2	32.73	6743	1	277	288
P04264|K2C1_HUMAN	R.SGGGFSSGSAGIINYQRR.T	Y	29.27	1812.89	3.5	605.305	3	35.89	7668	1	13	30
P04264|K2C1_HUMAN	K.NM(+15.99)QDM(+15.99)VEDYRNK.Y	Y	28.24	1573.65	0.6	525.558	3	18.66	2556	2	258	269	Oxidation (M)
P04264|K2C1_HUMAN	R.LDSELK.N	N	27.94	703.375	-0.7	352.695	2	19.01	2659	1	252	257
P13645|K1C10_HUMAN	K.GSLGGGFSSGGFSGGSFSR.G	Y	96.34	1706.76	2.1	854.391	2	46.15	10655	3	41	59
P13645|K1C10_HUMAN	R.GSSGGGC(+57.02)FGGSSGGYGGLGGFGGGSFR.G	Y	94.85	2341.98	1.4	1172	2	51.32	12130	4	60	86	Carbamidomethylation
P13645|K1C10_HUMAN	K.ELTTEIDNNIEQISSYK.S	Y	94.82	1995.96	0.7	998.99	2	54.76	13095	6	346	362
P13645|K1C10_HUMAN	R.AETEC(+57.02)QNTEYQQLLDIK.I	Y	87.66	2081.96	2	1041.99	2	50.93	12019	4	423	439	Carbamidomethylation
P13645|K1C10_HUMAN	R.SGGGGGGGGC(+57.02)GGGGGVSSLR.I	Y	85.53	1548.67	0.5	775.343	2	20.95	3220	3	16	35	Carbamidomethylation
P13645|K1C10_HUMAN	R.NVQALEIELQSQLALK.Q	Y	83.94	1796	1.3	899.011	2	64.68	15881	4	371	386
P13645|K1C10_HUMAN	R.NVSTGDVNVEM(+15.99)NAAPGVDLTQLLNNM(+15.99)R.S	Y	83.38	2903.38	2	968.801	3	59.27	14371	4	296	322	Oxidation (M)
P13645|K1C10_HUMAN	R.ALEESNYELEGK.I	Y	83.09	1380.64	0.4	691.328	2	31.4	6350	3	166	177
P13645|K1C10_HUMAN	K.VRALEESNYELEGK.I	Y	83.02	1635.81	1	818.913	2	31.77	6462	4	164	177
P13645|K1C10_HUMAN	K.NQILNLTTDNANILLQIDNAR.L	Y	81.56	2366.26	1.6	1184.14	2	66.95	16515	6	208	228
P13645|K1C10_HUMAN	R.SLLEGEGSSGGGGR.G	Y	79.87	1261.59	0.6	631.803	2	25.32	4541	2	451	464
P13645|K1C10_HUMAN	R.NVSTGDVNVEM(+15.99)NAAPGVDLTQLLNNMR.S	Y	79.42	2887.38	1.7	963.469	3	69.08	17108	3	296	322	Oxidation (M)
P13645|K1C10_HUMAN	K.QSLEASLAETEGR.Y	Y	78.74	1389.67	1.5	695.845	2	38.64	8468	3	387	399
P13645|K1C10_HUMAN	R.SQYEQLAEQNR.K	Y	77.88	1364.63	1.9	683.325	2	25.61	4628	2	323	333
P13645|K1C10_HUMAN	K.ADLEM(+15.99)QIESLTEELAYLK.K	Y	72.86	2111.03	2.7	1056.53	2	84.18	20390	4	267	284	Oxidation (M)
P13645|K1C10_HUMAN	K.IRLENEIQTYR.S	Y	71.97	1433.76	1.7	717.89	2	35.99	7694	5	440	450
P13645|K1C10_HUMAN	R.SQYEQLAEQNRK.D	Y	71.79	1492.73	1.2	747.372	2	21.57	3408	5	323	334
P13645|K1C10_HUMAN	R.NVSTGDVNVEMNAAPGVDLTQLLNNMR.S	Y	69.2	2871.39	1.4	958.137	3	72.77	18122	2	296	322
P13645|K1C10_HUMAN	R.VLDELTLTK.A	Y	68.94	1030.59	0.8	516.303	2	42.06	9457	2	258	266
P13645|K1C10_HUMAN	R.NVSTGDVNVEMNAAPGVDLTQLLNNM(+15.99)R.S	Y	68.85	2887.38	3.3	963.471	3	63.56	15570	2	296	322	Oxidation (M)
P13645|K1C10_HUMAN	K.DLRNVSTGDVNVEM(+15.99)NAAPGVDLTQLLNNM(+15.99)R.S	Y	67.27	3287.59	1.3	1096.87	3	59.46	14426	2	293	322	Oxidation (M)
P13645|K1C10_HUMAN	K.VTMQNLNDR.L	N	66.72	1089.52	1.5	545.77	2	25.47	4584	2	148	156
P13645|K1C10_HUMAN	R.QSVEADINGLR.R	N	65.86	1200.61	1.3	601.313	2	38.35	8386	2	246	256
P13645|K1C10_HUMAN	R.LENEIQTYR.S	Y	65.76	1164.58	1.1	583.297	2	28.72	5552	2	442	450
P13645|K1C10_HUMAN	K.YENEVALR.Q	Y	63.46	992.493	1.8	497.255	2	26.86	5003	2	238	245
P13645|K1C10_HUMAN	R.RVLDELTLTK.A	Y	62.53	1186.69	0.9	594.354	2	39.31	8660	2	257	266
P13645|K1C10_HUMAN	R.LKYENEVALR.Q	Y	62.02	1233.67	1.1	617.844	2	30.77	6161	4	236	245
P13645|K1C10_HUMAN	K.VTM(+15.99)QNLNDRLASYLDK.V	N	60.38	1895.94	2.1	948.98	2	45.88	10579	4	148	163	Oxidation (M)
P13645|K1C10_HUMAN	K.ADLEMQIESLTEELAYLK.K	Y	60.32	2095.04	0.2	1048.53	2	83.4	20275	3	267	284
P13645|K1C10_HUMAN	K.DAEAWFNEK.S	N	59.99	1108.48	3.2	555.25	2	43.04	9751	2	335	343
P13645|K1C10_HUMAN	K.VTM(+15.99)QNLNDR.L	N	59.84	1105.52	0.9	553.767	2	16.01	1769	6	148	156	Oxidation (M)
P13645|K1C10_HUMAN	R.LASYLDK.V	N	54.82	808.433	2.5	405.225	2	26.79	4982	2	157	163
P13645|K1C10_HUMAN	R.LAADDFR.L	N	53.15	806.392	1.6	404.204	2	28.58	5507	2	229	235
P13645|K1C10_HUMAN	K.ADLEM(+15.99)QIESLTEELAYLKK.N	Y	49.87	2239.13	1.7	747.385	3	75.06	18701	2	267	285	Oxidation (M)
P13645|K1C10_HUMAN	K.SEITELRR.N	Y	49.44	1002.55	0.8	502.281	2	22.97	3828	2	363	370
P13645|K1C10_HUMAN	K.VTMQNLNDRLASYLDK.V	N	46.87	1879.95	1	627.657	3	52.79	12544	1	148	163
P13645|K1C10_HUMAN	R.YC(+57.02)VQLSQIQAQISALEEQLQQIR.A	Y	44.84	2745.41	1.5	916.146	3	83.01	20221	3	400	422	Carbamidomethylation
P13645|K1C10_HUMAN	R.QSVEADINGLRR.V	N	42.12	1356.71	1.2	679.364	2	34.21	7175	4	246	257
P13645|K1C10_HUMAN	K.TIDDLK.N	Y	38.66	703.375	1.4	352.695	2	21.36	3345	2	202	207
P13645|K1C10_HUMAN	R.LAADDFRLK.Y	N	34.8	1047.57	1.4	350.198	3	37.02	7999	2	229	237
P01008|ANT3_HUMAN	K.AFLEVNEEGSEAAASTAVVIAGR.S	Y	107.08	2290.14	2.4	1146.08	2	55.38	13273	11	403	425
P01008|ANT3_HUMAN	K.EQLQDMGLVDLFSPEK.S	Y	86.89	1847.9	1.7	924.958	2	68.36	16909	4	365	380
P01008|ANT3_HUMAN	K.ATEDEGSEQKIPEATNR.R	Y	83.23	1873.87	2.3	937.942	2	21.1	3268	4	62	78
P01008|ANT3_HUMAN	R.VAEGTQVLELPFK.G	Y	80.04	1429.78	0.5	715.898	2	56.44	13571	2	295	307
P01008|ANT3_HUMAN	K.NDNDNIFLSPLSISTAFAMTK.L	Y	79.73	2298.12	2.5	1150.07	2	78.58	19500	6	103	123
P01008|ANT3_HUMAN	K.ADGESC(+57.02)SASM(+15.99)MYQEGK.F	Y	79.11	1765.66	1.1	883.838	2	24.01	4144	3	274	289	Carbamidomethylation; Oxidation (M)
P01008|ANT3_HUMAN	K.ADGESC(+57.02)SASMM(+15.99)YQEGK.F	Y	78.61	1765.66	0.9	883.838	2	22.43	3667	3	274	289	Carbamidomethylation; Oxidation (M)
P01008|ANT3_HUMAN	K.NDNDNIFLSPLSISTAFAM(+15.99)TK.L	Y	78.11	2314.11	1.7	1158.07	2	74.37	18523	15	103	123	Oxidation (M)
P01008|ANT3_HUMAN	K.ADGESC(+57.02)SASMMYQEGK.F	Y	77.13	1749.66	1.7	875.841	2	28.94	5623	2	274	289	Carbamidomethylation
P01008|ANT3_HUMAN	R.EVPLNTIIFMGR.V	Y	75.78	1388.75	1.3	695.382	2	63.25	15482	2	446	457
P01008|ANT3_HUMAN	R.EVPLNTIIFM(+15.99)GR.V	Y	75.64	1404.74	0.3	703.379	2	56.15	13488	10	446	457	Oxidation (M)
P01008|ANT3_HUMAN	K.TSDQIHFFFAK.L	Y	73.63	1339.66	1.8	670.837	2	51	12040	4	147	157
P01008|ANT3_HUMAN	K.EQLQDM(+15.99)GLVDLFSPEK.S	Y	73.21	1863.89	1.4	932.955	2	61.6	15023	11	365	380	Oxidation (M)
P01008|ANT3_HUMAN	R.FATTFYQHLADSK.N	Y	72	1527.74	0.4	764.875	2	42.48	9585	4	90	102
P01008|ANT3_HUMAN	K.ADGESC(+57.02)SASM(+15.99)M(+15.99)YQEGK.F	Y	70.27	1781.65	2.5	891.837	2	17.06	2079	4	274	289	Carbamidomethylation; Oxidation (M)
P01008|ANT3_HUMAN	K.LPGIVAEGRDDLYVSDAFHK.A	Y	69.48	2201.11	1.9	734.712	3	49.68	11665	4	383	402
P01008|ANT3_HUMAN	R.DDLYVSDAFHK.A	Y	67.97	1308.6	0.1	655.307	2	38.98	8567	4	392	402
P01008|ANT3_HUMAN	K.LQPLDFKENAEQSR.A	Y	66.48	1673.84	0	837.926	2	36.38	7810	4	202	215
P01008|ANT3_HUMAN	R.FRIEDGFSLK.E	Y	64.64	1210.63	1.2	606.325	2	47.8	11136	4	355	364
P01008|ANT3_HUMAN	K.SKLPGIVAEGRDDLYVSDAFHK.A	Y	63.95	2416.24	1.6	806.421	3	46.66	10807	8	381	402
P01008|ANT3_HUMAN	R.RVAEGTQVLELPFK.G	Y	63.9	1585.88	1.9	529.636	3	51.24	12107	2	294	307
P01008|ANT3_HUMAN	K.ANRPFLVFIR.E	Y	62.77	1231.72	2.2	616.868	2	52.94	12586	4	436	445
P01008|ANT3_HUMAN	R.SLNPNRVTFK.A	Y	61.66	1174.65	2	588.331	2	28.58	5510	4	426	435
P01008|ANT3_HUMAN	K.KATEDEGSEQKIPEATNR.R	Y	60.69	2001.96	1.2	668.328	3	18.46	2496	4	61	78
P01008|ANT3_HUMAN	K.SKLPGIVAEGR.D	Y	58.62	1125.65	1.8	563.834	2	30.14	5977	2	381	391
P01008|ANT3_HUMAN	K.ELFYKADGESC(+57.02)SASM(+15.99)M(+15.99)YQEGK.F	Y	57.22	2462.01	1.9	821.678	3	33.37	6929	1	269	289	Carbamidomethylation; Oxidation (M)
P01008|ANT3_HUMAN	R.VAEGTQVLELPFKGDDITM(+15.99)VLILPKPEK.S	Y	56.79	3095.68	1.1	1032.9	3	67.1	16559	5	295	322	Oxidation (M)
P01008|ANT3_HUMAN	R.DIPM(+15.99)NPM(+15.99)C(+57.02)IYR.S	Y	56.33	1440.62	0.6	721.318	2	36.37	7807	3	46	56	Oxidation (M); Carbamidomethylation
P01008|ANT3_HUMAN	K.LVSANRLFGDK.S	Y	56.26	1218.67	1.5	610.344	2	37.07	8011	3	172	182
P01008|ANT3_HUMAN	R.DIPMNPM(+15.99)C(+57.02)IYR.S	Y	56.17	1424.62	1	713.321	2	45.36	10427	2	46	56	Oxidation (M); Carbamidomethylation
P01008|ANT3_HUMAN	R.IEDGFSLK.E	Y	55.92	907.465	0.4	454.74	2	37.71	8199	2	357	364
P01008|ANT3_HUMAN	R.VAEGTQVLELPFKGDDITMVLILPKPEK.S	Y	55.63	3079.69	1.5	1027.57	3	70.85	17601	5	295	322
P01008|ANT3_HUMAN	K.GDDITMVLILPKPEK.S	Y	52.55	1667.92	0.6	556.98	3	57.08	13755	2	308	322
P01008|ANT3_HUMAN	K.LQPLDFK.E	Y	48.9	859.48	1.9	430.748	2	41.62	9329	2	202	208
P01008|ANT3_HUMAN	R.RVAEGTQVLELPFKGDDITM(+15.99)VLILPKPEK.S	Y	48.71	3251.78	0.3	813.953	4	63.74	15622	5	294	322	Oxidation (M)
P01008|ANT3_HUMAN	R.RVWELSK.A	Y	48.29	916.513	0.8	459.264	2	28.3	5426	2	79	85
P01008|ANT3_HUMAN	K.IPEATNR.R	Y	47.93	799.419	0.6	400.717	2	15.36	1581	2	72	78
P01008|ANT3_HUMAN	R.VANPC(+57.02)VK	Y	46.99	786.406	0.8	394.211	2	15.44	1605	2	458	464	Carbamidomethylation
P01008|ANT3_HUMAN	K.ATEDEGSEQKIPEATNRR.V	Y	46.15	2029.97	1.9	677.664	3	18.79	2591	4	62	79
P01008|ANT3_HUMAN	K.SKFSPENTRK.E	Y	44.4	1192.62	1	597.318	2	13.81	1131	3	259	268
P01008|ANT3_HUMAN	K.KATEDEGSEQKIPEATNRR.V	Y	43.22	2158.06	0.9	720.362	3	16.83	2011	4	61	79
P01008|ANT3_HUMAN	R.VWELSK.A	Y	42.35	760.412	1.6	381.214	2	34.19	7166	2	80	85
P01008|ANT3_HUMAN	K.FDTISEK.T	Y	38.43	838.407	0.9	420.211	2	22.91	3810	2	140	146
P01008|ANT3_HUMAN	K.FSPENTR.K	Y	37.65	849.398	0.9	425.707	2	17.88	2321	2	261	267
P01008|ANT3_HUMAN	R.ITDVIPSEAINELTVLVLVNTIYFK.G	Y	35.31	2803.56	3.7	935.532	3	99.75	22270	1	230	254
P01008|ANT3_HUMAN	R.RVAEGTQVLELPFKGDDITMVLILPKPEK.S	Y	34.04	3235.79	-0.5	809.954	4	67.41	16644	1	294	322
P01008|ANT3_HUMAN	K.ELFYK.A	Y	28.49	698.364	2	350.19	2	32.18	6581	2	269	273
P35908|K22E_HUMAN	K.SISISVAGGGGGFGAAGGFGGR.G	Y	86.36	1837.91	1.4	919.962	2	51.61	12209	3	71	92
P35908|K22E_HUMAN	K.VDLLNQEIEFLK.V	Y	82.52	1459.79	1.4	730.904	2	64.23	15756	2	303	314
P35908|K22E_HUMAN	K.GGSISGGGYGSGGGK.H	Y	81.66	1196.54	0.5	599.279	2	16.94	2042	2	581	595
P35908|K22E_HUMAN	K.VLYDAEISQIHQSVTDTNVILSM(+15.99)DNSR.N	Y	81.11	3063.48	2.7	1022.17	3	56.52	13592	3	315	341	Oxidation (M)
P35908|K22E_HUMAN	R.GFSSGSAVVSGGSR.R	Y	80.08	1253.6	0.9	627.808	2	25.7	4656	2	21	34
P35908|K22E_HUMAN	R.FLEQQNQVLQTK.W	N	77.53	1474.78	0.6	738.397	2	35.12	7435	3	198	209
P35908|K22E_HUMAN	R.NLDLDSIIAEVK.A	N	74.41	1328.72	0.6	665.367	2	65.43	16091	2	342	353
P35908|K22E_HUMAN	K.NVQDAIADAEQR.G	Y	74.18	1328.63	1.7	665.324	2	35.33	7499	2	419	430
P35908|K22E_HUMAN	R.GGGFGGGSSFGGGSGFSGGGFGGGGFGGGR.F	Y	73.7	2398.01	3.1	800.347	3	52.91	12582	2	93	122
P35908|K22E_HUMAN	R.HGGGGGGFGGGGFGSR.S	Y	71.34	1319.58	1.3	440.866	3	25.4	4564	2	46	61
P35908|K22E_HUMAN	R.TAAENDFVTLK.K	Y	71.25	1207.61	0.8	604.812	2	38.87	8533	2	276	286
P35908|K22E_HUMAN	K.YEELQVTVGR.H	Y	71.16	1192.61	1.7	597.313	2	37.13	8027	2	375	384
P35908|K22E_HUMAN	K.VRFLEQQNQVLQTK.W	N	70.42	1729.95	0.6	865.982	2	37.5	8138	3	196	209
P35908|K22E_HUMAN	R.M(+15.99)SGDLSSNVTVSVTSSTISSNVASK.A	Y	69.74	2473.19	1.8	825.404	3	44.38	10140	2	491	515	Oxidation (M)
P35908|K22E_HUMAN	R.GSSSGGGYSSGSSSYGSGGR.Q	Y	68.45	1739.7	1.7	870.858	2	17.11	2094	2	525	544
P35908|K22E_HUMAN	R.TAAENDFVTLKK.D	Y	67.4	1335.7	1	668.86	2	31.41	6352	4	276	287
P35908|K22E_HUMAN	K.AQYEEIAQR.S	N	66.45	1106.54	1.5	554.276	2	24.15	4187	3	354	362
P35908|K22E_HUMAN	K.LALDVEIATYR.K	N	66.43	1262.69	0.7	632.351	2	52.6	12492	2	471	481
P35908|K22E_HUMAN	R.YLDGLTAER.T	Y	66.17	1036.52	1.2	519.267	2	35.5	7547	2	239	247
P35908|K22E_HUMAN	R.SKEEAEALYHSK.Y	Y	65.86	1390.67	1.5	464.566	3	18.51	2510	3	363	374
P35908|K22E_HUMAN	K.DVDNAYM(+15.99)IK.V	Y	64.21	1083.49	1.4	542.753	2	29.06	5657	2	288	296	Oxidation (M)
P35908|K22E_HUMAN	R.NKLNDLEEALQQAK.E	Y	61.25	1612.84	0.5	538.622	3	48.95	11463	3	440	453
P35908|K22E_HUMAN	R.TSQNSELNNMQDLVEDYK.K	Y	60.95	2126.94	2.2	709.99	3	53.72	12807	1	248	265
P35908|K22E_HUMAN	R.LQGEIAHVK.K	Y	60.8	993.561	1	497.788	2	20.31	3032	2	406	414
P35908|K22E_HUMAN	K.LLEGEEC(+57.02)R.M	N	60.38	1004.46	1.4	503.238	2	21.37	3346	1	483	490	Carbamidomethylation
P35908|K22E_HUMAN	K.VDPEIQNVK.A	Y	59.93	1040.55	1.7	521.283	2	25.6	4625	2	167	175
P35908|K22E_HUMAN	K.RYLDGLTAER.T	Y	59.22	1192.62	1.3	597.318	2	32.13	6566	2	238	247
P35908|K22E_HUMAN	K.FASFIDK.V	N	56.09	826.423	1.3	414.219	2	38.21	8344	2	189	195
P35908|K22E_HUMAN	R.SKEEAEALYHSKYEELQVTVGR.H	Y	55.15	2565.27	1.2	642.326	4	40.26	8935	2	363	384
P35908|K22E_HUMAN	R.LLRDYQELMNVK.L	N	54.6	1520.8	1.3	507.942	3	45.37	10429	2	459	470
P35908|K22E_HUMAN	K.LNDLEEALQQAKEDLAR.L	Y	53.91	1955	1.1	652.673	3	63.19	15468	2	442	458
P35908|K22E_HUMAN	R.TSQNSELNNMQDLVEDYKK.K	Y	53.5	2255.04	0.6	752.687	3	48.48	11325	2	248	266
P35908|K22E_HUMAN	K.IEISELNR.V	N	53.42	972.524	0.8	487.27	2	34.93	7376	2	394	401
P35908|K22E_HUMAN	R.SLVGLGGTK.S	Y	53.11	830.486	-0.1	416.25	2	31.2	6293	1	62	70
P35908|K22E_HUMAN	K.KYEDEINKR.T	N	52.85	1193.6	0.3	597.809	2	15.59	1650	3	267	275
P35908|K22E_HUMAN	R.DYQELM(+15.99)NVK.L	N	50.84	1154.53	2.5	578.273	2	29.5	5792	2	462	470	Oxidation (M)
P35908|K22E_HUMAN	K.VLYDAEISQIHQSVTDTNVILSMDNSR.N	Y	49.87	3047.49	2.4	1016.84	3	60.81	14802	1	315	341
P35908|K22E_HUMAN	K.NVQDAIADAEQRGEHALK.D	Y	49.85	1963.97	2.2	655.666	3	45.97	10604	3	419	436
P35908|K22E_HUMAN	R.GGSSSGGGYGSGGGGSSSVK.G	Y	48.12	1587.68	2.4	794.847	2	14.73	1400	1	604	623
P35908|K22E_HUMAN	R.TSQNSELNNM(+15.99)QDLVEDYKK.K	Y	47.58	2271.03	1.8	758.019	3	33.36	6923	2	248	266	Oxidation (M)
P35908|K22E_HUMAN	K.KKYEDEINKR.T	N	47.36	1321.7	-0.2	441.574	3	14.08	1206	2	266	275
P35908|K22E_HUMAN	K.YEDEINKR.T	N	45.15	1065.51	0.9	533.762	2	15.95	1751	3	268	275
P35908|K22E_HUMAN	K.LALDVEIATYRK.L	N	44.53	1390.78	1.9	464.602	3	45.86	10570	2	471	482
P35908|K22E_HUMAN	K.EIKIEISELNR.V	Y	43.24	1342.75	1.5	448.59	3	43.73	9951	2	391	401
P35908|K22E_HUMAN	R.KLLEGEEC(+57.02)R.M	N	39.06	1132.55	-0.5	378.525	3	19.16	2704	2	482	490	Carbamidomethylation
P35908|K22E_HUMAN	K.IEISELNRVIQR.L	N	31.67	1468.84	1.8	490.62	3	46.3	10697	2	394	405
P35908|K22E_HUMAN	R.RSTSSFSC(+57.02)LSR.H	Y	31.23	1286.6	-3.9	644.307	2	24.81	4391	1	35	45	Carbamidomethylation
P35527|K1C9_HUMAN	R.HGVQELEIELQSQLSK.K	Y	93.99	1836.96	1.6	919.488	2	54.08	12908	4	375	390
P35527|K1C9_HUMAN	K.VQALEEANNDLENK.I	Y	88.08	1585.76	1.6	793.888	2	33.34	6917	2	171	184
P35527|K1C9_HUMAN	R.GGGGSFGYSYGGGSGGGFSASSLGGGFGGGSR.G	Y	84.17	2704.15	1.6	902.393	3	52.51	12467	3	64	95
P35527|K1C9_HUMAN	R.GGSGGSHGGGSGFGGESGGSYGGGEEASGSGGGYGGGSGK.S	Y	82.37	3222.27	2.4	1075.1	3	25.12	4483	2	580	619
P35527|K1C9_HUMAN	K.NYSPYYNTIDDLK.D	Y	82.3	1604.74	1.3	803.376	2	46.51	10760	3	200	212
P35527|K1C9_HUMAN	K.EIETYHNLLEGGQEDFESSGAGK.I	Y	81.23	2509.12	1.3	837.383	3	47.24	10970	4	450	472
P35527|K1C9_HUMAN	R.GGSGGSYGGGGSGGGYGGGSGSR.G	Y	81.03	1790.72	0.6	896.368	2	16.66	1958	4	491	513
P35527|K1C9_HUMAN	K.DQIVDLTVGNNK.T	Y	80.22	1314.68	1.1	658.347	2	40.32	8953	2	213	224
P35527|K1C9_HUMAN	R.HGVQELEIELQSQLSKK.A	Y	78.78	1965.05	2.1	656.026	3	50.78	11976	2	375	391
P35527|K1C9_HUMAN	R.SGGGGGGGLGSGGSIR.S	Y	77.4	1231.59	0.5	616.803	2	21.38	3350	2	14	29
P35527|K1C9_HUMAN	R.FSSSSGYGGGSSR.V	Y	72.35	1234.52	0.5	618.268	2	17.73	2273	2	47	59
P35527|K1C9_HUMAN	R.QVLDNLTM(+15.99)EK.S	Y	68.1	1205.6	0.7	603.806	2	33.9	7082	2	262	271	Oxidation (M)
P35527|K1C9_HUMAN	K.STMQELNSR.L	Y	67.96	1064.49	1.4	533.254	2	21.83	3486	2	155	163
P35527|K1C9_HUMAN	K.TLLDIDNTR.M	Y	64.67	1059.56	0.8	530.786	2	40.1	8889	2	225	233
P35527|K1C9_HUMAN	R.QGVDADINGLR.Q	Y	64.23	1156.58	1.6	579.3	2	34.86	7360	1	251	261
P35527|K1C9_HUMAN	K.STM(+15.99)QELNSR.L	Y	63.67	1080.49	1.3	541.251	2	15.14	1517	2	155	163	Oxidation (M)
P35527|K1C9_HUMAN	K.DIENQYETQITQIEHEVSSSGQEVQSSAK.E	Y	63.55	3263.51	1.9	1088.84	3	61.68	15043	2	340	368
P35527|K1C9_HUMAN	R.MTLDDFR.I	Y	58.48	896.406	2	449.211	2	41.92	9416	2	234	240
P35527|K1C9_HUMAN	K.NYSPYYNTIDDLKDQIVDLTVGNNK.T	Y	58.25	2901.4	1.5	968.143	3	71.42	17752	2	200	224
P35527|K1C9_HUMAN	R.QVLDNLTMEK.S	Y	58.22	1189.6	1.3	595.809	2	39.24	8640	2	262	271
P35527|K1C9_HUMAN	K.IQDWYDK.K	Y	56.87	966.445	1.1	484.23	2	32.04	6537	2	185	191
P35527|K1C9_HUMAN	K.SDLEM(+15.99)QYETLQEELM(+15.99)ALK.K	Y	56.2	2202.01	1.8	735.011	3	69.03	17097	4	272	289	Oxidation (M)
P35527|K1C9_HUMAN	K.FEM(+15.99)EQNLR.Q	Y	55.92	1081.49	1	541.751	2	22.86	3799	2	243	250	Oxidation (M)
P35527|K1C9_HUMAN	K.TLNDMRQEYEQLIAK.N	Y	54.89	1850.92	1	926.468	2	51.54	12190	4	322	336
P35527|K1C9_HUMAN	R.LASYLDK.V	N	54.82	808.433	2.5	405.225	2	26.79	4982	2	164	170
P35527|K1C9_HUMAN	K.TLNDM(+15.99)RQEYEQLIAK.N	Y	54.49	1866.91	1.7	623.313	3	40.68	9058	5	322	336	Oxidation (M)
P35527|K1C9_HUMAN	R.IKFEMEQNLR.Q	Y	54.26	1306.67	0.4	654.343	2	38.6	8461	4	241	250
P35527|K1C9_HUMAN	K.SDLEMQYETLQEELM(+15.99)ALK.K	Y	53.66	2186.01	2.8	1094.02	2	69.93	17348	2	272	289	Oxidation (M)
P35527|K1C9_HUMAN	R.M(+15.99)TLDDFR.I	Y	53.22	912.401	1.4	457.209	2	31.97	6518	2	234	240	Oxidation (M)
P35527|K1C9_HUMAN	R.IKFEM(+15.99)EQNLR.Q	Y	49.15	1322.67	0.7	441.896	3	28.86	5593	5	241	250	Oxidation (M)
P35527|K1C9_HUMAN	K.TLLDIDNTRM(+15.99)TLDDFR.I	Y	43.73	1953.95	0.5	652.323	3	54.07	12905	2	225	240	Oxidation (M)
P35527|K1C9_HUMAN	K.IQDWYDKK.G	Y	41.35	1094.54	0.6	365.854	3	26.39	4861	3	185	192
P35527|K1C9_HUMAN	R.QFSSSYLSR.S	Y	40.07	1073.51	0.5	537.765	2	32.63	6712	1	5	13
P35527|K1C9_HUMAN	R.QEYEQLIAK.N	Y	34.48	1120.58	1.7	561.296	2	33.79	7049	1	328	336
P35527|K1C9_HUMAN	K.SDLEM(+15.99)QYETLQEELM(+15.99)ALKK.N	Y	30.46	2330.1	3.3	777.711	3	63.12	15450	2	272	290	Oxidation (M)
P35527|K1C9_HUMAN	K.EVTQLR.H	Y	27.31	744.413	0.5	373.214	2	18.09	2380	1	369	374
P01042|KNG1_HUMAN	K.KYNSQNQSNNQFVLYR.I	Y	94.76	2001.97	2.2	1001.99	2	35.92	7674	5	43	58
P01042|KNG1_HUMAN	K.YNSQNQSNNQFVLYR.I	Y	88.74	1873.87	1.4	937.944	2	40.67	9056	4	44	58
P01042|KNG1_HUMAN	R.DIPTNSPELEETLTHTITK.L	Y	86.56	2138.07	1.3	1070.05	2	52.56	12479	4	270	288
P01042|KNG1_HUMAN	K.LGQSLDC(+57.02)NAEVYVVPWEK.K	Y	85.72	2106.01	2.8	1054.01	2	57.12	13766	2	345	362	Carbamidomethylation
P01042|KNG1_HUMAN	R.IASFSQNC(+57.02)DIYPGK.D	Y	85.15	1598.74	1.1	800.378	2	39.15	8615	4	241	254	Carbamidomethylation
P01042|KNG1_HUMAN	K.KLGQSLDC(+57.02)NAEVYVVPWEK.K	Y	77.65	2234.1	2	1118.06	2	52.75	12535	2	344	362	Carbamidomethylation
P01042|KNG1_HUMAN	K.TVGSDTFYSFK.Y	Y	76.07	1250.58	1.2	626.299	2	44.35	10127	2	65	75
P01042|KNG1_HUMAN	K.ENFLFLTPDC(+57.02)K.S	Y	72.92	1382.65	1.8	692.336	2	57.7	13928	2	209	219	Carbamidomethylation
P01042|KNG1_HUMAN	K.TVGSDTFYSFKYEIK.E	Y	72.41	1783.87	1.4	892.942	2	49.76	11691	4	65	79
P01042|KNG1_HUMAN	K.KYFIDFVAR.E	Y	71.18	1157.62	1.7	579.82	2	48.78	11408	4	316	324
P01042|KNG1_HUMAN	K.ESNEELTESC(+57.02)ETK.K	Y	70.97	1554.64	0.5	778.325	2	20.25	3013	2	331	343	Carbamidomethylation
P01042|KNG1_HUMAN	K.SLWNGDTGEC(+57.02)TDNAYIDIQLR.I	Y	69.3	2440.1	2.4	814.375	3	59.08	14318	2	220	240	Carbamidomethylation
P01042|KNG1_HUMAN	K.IYPTVNC(+57.02)QPLGM(+15.99)ISLM(+15.99)K.R	Y	69.2	1995.98	2.1	999.001	2	51.05	12056	2	364	380	Carbamidomethylation; Oxidation (M)
P01042|KNG1_HUMAN	K.DFVQPPTK.I	Y	67.97	930.481	1.1	466.248	2	28.3	5427	4	255	262
P01042|KNG1_HUMAN	K.AATGEC(+57.02)TATVGKR.S	Y	66.66	1320.65	0.6	661.331	2	14.51	1331	4	102	114	Carbamidomethylation
P01042|KNG1_HUMAN	R.QVVAGLNFR.I	Y	65.75	1002.56	1	502.288	2	42.14	9480	2	188	196
P01042|KNG1_HUMAN	K.KIYPTVNC(+57.02)QPLGM(+15.99)ISLM(+15.99)K.R	Y	65.7	2124.08	1	709.034	3	46.44	10740	1	363	380	Carbamidomethylation; Oxidation (M)
P01042|KNG1_HUMAN	K.LGQSLDC(+57.02)NAEVYVVPWEKK.I	Y	63.72	2234.1	0.7	745.709	3	52.01	12326	2	345	363	Carbamidomethylation
P01042|KNG1_HUMAN	K.KIYPTVNC(+57.02)QPLGMISLM(+15.99)K.R	Y	63.3	2108.08	1	703.702	3	51.71	12239	1	363	380	Carbamidomethylation; Oxidation (M)
P01042|KNG1_HUMAN	K.AATGEC(+57.02)TATVGK.R	Y	63.27	1164.54	0.5	583.28	2	15.58	1645	2	102	113	Carbamidomethylation
P01042|KNG1_HUMAN	K.YFIDFVAR.E	Y	61.7	1029.53	0.4	515.772	2	54.89	13130	2	317	324
P01042|KNG1_HUMAN	K.TWQDC(+57.02)EYK.D	Y	60.62	1128.45	0.8	565.235	2	26.3	4835	2	90	97	Carbamidomethylation
P01042|KNG1_HUMAN	K.EGDC(+57.02)PVQSGK.T	Y	57.38	1075.46	0.9	538.738	2	14.14	1223	2	80	89	Carbamidomethylation
P01042|KNG1_HUMAN	K.KIYPTVNC(+57.02)QPLGM(+15.99)ISLMK.R	Y	56.41	2108.08	2.3	703.703	3	51.62	12213	1	363	380	Carbamidomethylation; Oxidation (M)
P01042|KNG1_HUMAN	R.AQRQVVAGLNFR.I	Y	54.87	1357.76	3.9	453.595	3	36.95	7977	1	185	196
P01042|KNG1_HUMAN	R.VQVVAGK.K	Y	45.73	699.428	1.1	350.722	2	16.31	1854	2	309	315
P01042|KNG1_HUMAN	K.RPPGFSPFR.S	Y	45.33	1059.56	1.4	530.789	2	35.67	7598	2	381	389
P01042|KNG1_HUMAN	K.AVDAALKK.Y	Y	44.72	814.491	0	408.253	2	15.52	1630	2	36	43
P01042|KNG1_HUMAN	K.IYPTVNC(+57.02)QPLGMISLM(+15.99)K.R	Y	42.34	1979.99	-0.3	991.001	2	56.79	13673	7	364	380	Carbamidomethylation; Oxidation (M)
P01042|KNG1_HUMAN	K.KLGQSLDC(+57.02)NAEVYVVPWEKK.I	Y	41.99	2362.2	2.6	591.558	4	48.41	11306	3	344	363	Carbamidomethylation
P01042|KNG1_HUMAN	K.IC(+57.02)VGC(+57.02)PR.D	Y	39.35	860.4	1.7	431.208	2	22.28	3618	1	263	269	Carbamidomethylation
P01042|KNG1_HUMAN	K.ARVQVVAGK.K	Y	36.18	926.566	0.4	464.291	2	16.03	1775	1	307	315
P48668|K2C6C_HUMAN	R.AIGGGLSSVGGGSSTIK.Y	N	92.5	1446.77	1.8	724.393	2	35.23	7465	3	534	550
P48668|K2C6C_HUMAN	R.GSGGLGGAC(+57.02)GGAGFGSR.S	N	85.46	1423.63	1.9	712.822	2	29.47	5783	1	43	59	Carbamidomethylation
P48668|K2C6C_HUMAN	R.ISIGGGSC(+57.02)AISGGYGSR.A	N	84.6	1597.75	1.2	799.884	2	37.37	8098	2	70	86	Carbamidomethylation
P48668|K2C6C_HUMAN	R.SRGSGGLGGAC(+57.02)GGAGFGSR.S	N	79.4	1666.76	1.8	556.595	3	25.61	4626	2	41	59	Carbamidomethylation
P48668|K2C6C_HUMAN	K.YEELQVTAGR.H	N	75.84	1164.58	1.3	583.297	2	31.11	6264	2	360	369
P48668|K2C6C_HUMAN	R.NLDLDSIIAEVK.A	N	74.41	1328.72	0.6	665.367	2	65.43	16091	2	327	338
P48668|K2C6C_HUMAN	R.AEAESWYQTK.Y	N	70.72	1211.55	1.4	606.781	2	30.72	6147	2	350	359
P48668|K2C6C_HUMAN	K.NKLEGLEDALQK.A	N	68.35	1356.72	0.1	679.37	2	39.9	8832	2	425	436
P48668|K2C6C_HUMAN	K.ADTLTDEINFLR.A	N	66.78	1406.7	0.7	704.36	2	58.82	14244	2	288	299
P48668|K2C6C_HUMAN	K.AQYEEIAQR.S	N	66.45	1106.54	1.5	554.276	2	24.15	4187	3	339	347
P48668|K2C6C_HUMAN	K.LALDVEIATYR.K	N	66.43	1262.69	0.7	632.351	2	52.6	12492	2	456	466
P48668|K2C6C_HUMAN	R.SRAEAESWYQTK.Y	N	65.75	1454.68	1.9	728.348	2	27.1	5078	4	348	359
P48668|K2C6C_HUMAN	R.TAAENEFVTLKK.D	N	65.23	1349.72	1.8	675.868	2	32.2	6586	4	261	272
P48668|K2C6C_HUMAN	R.SGFSSISVSR.S	N	65.18	1025.51	0.7	513.765	2	33.85	7067	2	31	40
P48668|K2C6C_HUMAN	R.TAAENEFVTLK.K	N	62.72	1221.62	1.2	611.82	2	39.45	8700	2	261	271
P48668|K2C6C_HUMAN	R.ALYDAELSQMQTHISDTSVVLSM(+15.99)DNNR.N	N	61.65	3053.41	2.2	1018.81	3	56.92	13710	2	300	326	Oxidation (M)
P48668|K2C6C_HUMAN	K.DVDAAYM(+15.99)NK.V	N	60.45	1041.44	0.6	521.729	2	18.65	2551	2	273	281	Oxidation (M)
P48668|K2C6C_HUMAN	K.LLEGEEC(+57.02)R.L	N	60.38	1004.46	1.4	503.238	2	21.37	3346	1	468	475	Carbamidomethylation
P48668|K2C6C_HUMAN	K.NKYEDEINKR.T	N	59.87	1307.65	1.1	654.832	2	18.67	2557	4	251	260
P48668|K2C6C_HUMAN	K.DVDAAYMNK.V	N	59.28	1025.45	0.1	513.732	2	25.28	4532	2	273	281
P48668|K2C6C_HUMAN	R.ALYDAELSQM(+15.99)QTHISDTSVVLSM(+15.99)DNNR.N	N	58.74	3069.4	1.7	1024.14	3	46.91	10878	1	300	326	Oxidation (M)
P48668|K2C6C_HUMAN	K.EYQELM(+15.99)NVK.L	N	57.63	1168.54	1.5	585.28	2	26.86	5005	2	447	455	Oxidation (M)
P48668|K2C6C_HUMAN	K.FASFIDK.V	N	56.09	826.423	1.3	414.219	2	38.21	8344	2	174	180
P48668|K2C6C_HUMAN	R.QLDSIVGER.G	N	55.22	1015.53	1.9	508.773	2	32.21	6591	2	224	232
P48668|K2C6C_HUMAN	R.SLYGLGGSK.R	N	53.76	880.465	0.4	441.24	2	32.55	6689	2	60	68
P48668|K2C6C_HUMAN	K.NKYEDEINK.R	N	53.55	1151.55	1.5	576.781	2	18.81	2598	3	251	259
P48668|K2C6C_HUMAN	R.RGFSANSAR.L	N	52.15	964.484	0.5	483.25	2	14.75	1405	2	16	24
P48668|K2C6C_HUMAN	R.NMQDLVEDLK.N	N	51.08	1203.58	0.6	602.798	2	51.31	12129	2	241	250
P48668|K2C6C_HUMAN	R.QNLEPLFEQYINNLR.R	N	50.06	1889.96	2.8	945.992	2	70.33	17456	3	208	222
P48668|K2C6C_HUMAN	K.VLDTKWTLLQEQGTK.T	N	48.3	1758.95	1.8	587.326	3	46.9	10877	1	190	204
P48668|K2C6C_HUMAN	R.LRSEIDHVK.K	N	47.92	1095.6	0.4	366.209	3	16.74	1981	2	391	399
P48668|K2C6C_HUMAN	K.YEDEINKR.T	N	45.15	1065.51	0.9	533.762	2	15.95	1751	3	253	260
P48668|K2C6C_HUMAN	K.LALDVEIATYRK.L	N	44.53	1390.78	1.9	464.602	3	45.86	10570	2	456	467
P48668|K2C6C_HUMAN	R.GRLDSELR.N	N	43.32	944.504	0.7	473.26	2	21.8	3475	2	233	240
P48668|K2C6C_HUMAN	R.RQLDSIVGER.G	N	42.94	1171.63	0.6	586.823	2	28.19	5395	1	223	232
P48668|K2C6C_HUMAN	R.NM(+15.99)QDLVEDLK.N	N	42.62	1219.58	1.4	610.796	2	38.58	8452	2	241	250	Oxidation (M)
P48668|K2C6C_HUMAN	R.KLLEGEEC(+57.02)R.L	N	39.06	1132.55	-0.5	378.525	3	19.16	2704	2	467	475	Carbamidomethylation
P48668|K2C6C_HUMAN	R.FLEQQNK.V	N	38.16	905.461	1.3	453.738	2	18.94	2638	2	183	189
P48668|K2C6C_HUMAN	K.VRFLEQQNK.V	N	35.58	1160.63	0.9	581.323	2	24.87	4410	3	181	189
P48668|K2C6C_HUMAN	R.LRSEIDHVKK.Q	N	34.69	1223.7	0.6	408.907	3	14.65	1373	2	391	400
P02538|K2C6A_HUMAN	R.AIGGGLSSVGGGSSTIK.Y	N	92.5	1446.77	1.8	724.393	2	35.23	7465	3	534	550
P02538|K2C6A_HUMAN	R.GSGGLGGAC(+57.02)GGAGFGSR.S	N	85.46	1423.63	1.9	712.822	2	29.47	5783	1	43	59	Carbamidomethylation
P02538|K2C6A_HUMAN	R.ISIGGGSC(+57.02)AISGGYGSR.A	N	84.6	1597.75	1.2	799.884	2	37.37	8098	2	70	86	Carbamidomethylation
P02538|K2C6A_HUMAN	R.SRGSGGLGGAC(+57.02)GGAGFGSR.S	N	79.4	1666.76	1.8	556.595	3	25.61	4626	2	41	59	Carbamidomethylation
P02538|K2C6A_HUMAN	K.YEELQVTAGR.H	N	75.84	1164.58	1.3	583.297	2	31.11	6264	2	360	369
P02538|K2C6A_HUMAN	R.NLDLDSIIAEVK.A	N	74.41	1328.72	0.6	665.367	2	65.43	16091	2	327	338
P02538|K2C6A_HUMAN	R.AEAESWYQTK.Y	N	70.72	1211.55	1.4	606.781	2	30.72	6147	2	350	359
P02538|K2C6A_HUMAN	K.NKLEGLEDALQK.A	N	68.35	1356.72	0.1	679.37	2	39.9	8832	2	425	436
P02538|K2C6A_HUMAN	K.ADTLTDEINFLR.A	N	66.78	1406.7	0.7	704.36	2	58.82	14244	2	288	299
P02538|K2C6A_HUMAN	K.AQYEEIAQR.S	N	66.45	1106.54	1.5	554.276	2	24.15	4187	3	339	347
P02538|K2C6A_HUMAN	K.LALDVEIATYR.K	N	66.43	1262.69	0.7	632.351	2	52.6	12492	2	456	466
P02538|K2C6A_HUMAN	R.SRAEAESWYQTK.Y	N	65.75	1454.68	1.9	728.348	2	27.1	5078	4	348	359
P02538|K2C6A_HUMAN	R.TAAENEFVTLKK.D	N	65.23	1349.72	1.8	675.868	2	32.2	6586	4	261	272
P02538|K2C6A_HUMAN	R.SGFSSVSVSR.S	Y	63.51	1011.5	1.2	506.757	2	28.79	5571	2	31	40
P02538|K2C6A_HUMAN	R.TAAENEFVTLK.K	N	62.72	1221.62	1.2	611.82	2	39.45	8700	2	261	271
P02538|K2C6A_HUMAN	R.GM(+15.99)QDLVEDFK.N	Y	62.53	1196.54	1	599.277	2	40.54	9019	2	241	250	Oxidation (M)
P02538|K2C6A_HUMAN	R.ALYDAELSQMQTHISDTSVVLSM(+15.99)DNNR.N	N	61.65	3053.41	2.2	1018.81	3	56.92	13710	2	300	326	Oxidation (M)
P02538|K2C6A_HUMAN	R.GMQDLVEDFK.N	Y	60.69	1180.54	2.2	591.28	2	52.29	12405	1	241	250
P02538|K2C6A_HUMAN	K.DVDAAYM(+15.99)NK.V	N	60.45	1041.44	0.6	521.729	2	18.65	2551	2	273	281	Oxidation (M)
P02538|K2C6A_HUMAN	K.LLEGEEC(+57.02)R.L	N	60.38	1004.46	1.4	503.238	2	21.37	3346	1	468	475	Carbamidomethylation
P02538|K2C6A_HUMAN	K.NKYEDEINKR.T	N	59.87	1307.65	1.1	654.832	2	18.67	2557	4	251	260
P02538|K2C6A_HUMAN	K.DVDAAYMNK.V	N	59.28	1025.45	0.1	513.732	2	25.28	4532	2	273	281
P02538|K2C6A_HUMAN	R.ALYDAELSQM(+15.99)QTHISDTSVVLSM(+15.99)DNNR.N	N	58.74	3069.4	1.7	1024.14	3	46.91	10878	1	300	326	Oxidation (M)
P02538|K2C6A_HUMAN	K.EYQELM(+15.99)NVK.L	N	57.63	1168.54	1.5	585.28	2	26.86	5005	2	447	455	Oxidation (M)
P02538|K2C6A_HUMAN	K.FASFIDK.V	N	56.09	826.423	1.3	414.219	2	38.21	8344	2	174	180
P02538|K2C6A_HUMAN	R.QLDSIVGER.G	N	55.22	1015.53	1.9	508.773	2	32.21	6591	2	224	232
P02538|K2C6A_HUMAN	R.SLYGLGGSK.R	N	53.76	880.465	0.4	441.24	2	32.55	6689	2	60	68
P02538|K2C6A_HUMAN	K.NKYEDEINK.R	N	53.55	1151.55	1.5	576.781	2	18.81	2598	3	251	259
P02538|K2C6A_HUMAN	R.RGFSANSAR.L	N	52.15	964.484	0.5	483.25	2	14.75	1405	2	16	24
P02538|K2C6A_HUMAN	R.QNLEPLFEQYINNLR.R	N	50.06	1889.96	2.8	945.992	2	70.33	17456	3	208	222
P02538|K2C6A_HUMAN	R.LRSEIDHVK.K	N	47.92	1095.6	0.4	366.209	3	16.74	1981	2	391	399
P02538|K2C6A_HUMAN	K.YEDEINKR.T	N	45.15	1065.51	0.9	533.762	2	15.95	1751	3	253	260
P02538|K2C6A_HUMAN	K.LALDVEIATYRK.L	N	44.53	1390.78	1.9	464.602	3	45.86	10570	2	456	467
P02538|K2C6A_HUMAN	R.GRLDSELR.G	N	43.32	944.504	0.7	473.26	2	21.8	3475	2	233	240
P02538|K2C6A_HUMAN	R.RQLDSIVGER.G	N	42.94	1171.63	0.6	586.823	2	28.19	5395	1	223	232
P02538|K2C6A_HUMAN	R.KLLEGEEC(+57.02)R.L	N	39.06	1132.55	-0.5	378.525	3	19.16	2704	2	467	475	Carbamidomethylation
P02538|K2C6A_HUMAN	R.FLEQQNK.V	N	38.16	905.461	1.3	453.738	2	18.94	2638	2	183	189
P02538|K2C6A_HUMAN	K.VRFLEQQNK.V	N	35.58	1160.63	0.9	581.323	2	24.87	4410	3	181	189
P02538|K2C6A_HUMAN	R.LRSEIDHVKK.Q	N	34.69	1223.7	0.6	408.907	3	14.65	1373	2	391	400
P04259|K2C6B_HUMAN	R.ATGGGLSSVGGGSSTIK.Y	Y	86.56	1434.73	0.6	718.373	2	28.45	5473	4	534	550
P04259|K2C6B_HUMAN	R.GSGGLGGAC(+57.02)GGAGFGSR.S	N	85.46	1423.63	1.9	712.822	2	29.47	5783	1	43	59	Carbamidomethylation
P04259|K2C6B_HUMAN	R.ISIGGGSC(+57.02)AISGGYGSR.A	N	84.6	1597.75	1.2	799.884	2	37.37	8098	2	70	86	Carbamidomethylation
P04259|K2C6B_HUMAN	R.SRGSGGLGGAC(+57.02)GGAGFGSR.S	N	79.4	1666.76	1.8	556.595	3	25.61	4626	2	41	59	Carbamidomethylation
P04259|K2C6B_HUMAN	R.NLDLDSIIAEVK.A	N	74.41	1328.72	0.6	665.367	2	65.43	16091	2	327	338
P04259|K2C6B_HUMAN	K.YEELQITAGR.H	N	73.08	1178.59	1.5	590.305	2	35.99	7692	2	360	369
P04259|K2C6B_HUMAN	R.AEAESWYQTK.Y	N	70.72	1211.55	1.4	606.781	2	30.72	6147	2	350	359
P04259|K2C6B_HUMAN	K.NKLEGLEDALQK.A	N	68.35	1356.72	0.1	679.37	2	39.9	8832	2	425	436
P04259|K2C6B_HUMAN	K.ADTLTDEINFLR.A	N	66.78	1406.7	0.7	704.36	2	58.82	14244	2	288	299
P04259|K2C6B_HUMAN	K.AQYEEIAQR.S	N	66.45	1106.54	1.5	554.276	2	24.15	4187	3	339	347
P04259|K2C6B_HUMAN	K.LALDVEIATYR.K	N	66.43	1262.69	0.7	632.351	2	52.6	12492	2	456	466
P04259|K2C6B_HUMAN	R.SRAEAESWYQTK.Y	N	65.75	1454.68	1.9	728.348	2	27.1	5078	4	348	359
P04259|K2C6B_HUMAN	R.TAAENEFVTLKK.D	N	65.23	1349.72	1.8	675.868	2	32.2	6586	4	261	272
P04259|K2C6B_HUMAN	R.SGFSSISVSR.S	N	65.18	1025.51	0.7	513.765	2	33.85	7067	2	31	40
P04259|K2C6B_HUMAN	R.TAAENEFVTLK.K	N	62.72	1221.62	1.2	611.82	2	39.45	8700	2	261	271
P04259|K2C6B_HUMAN	R.ALYDAELSQMQTHISDTSVVLSM(+15.99)DNNR.N	N	61.65	3053.41	2.2	1018.81	3	56.92	13710	2	300	326	Oxidation (M)
P04259|K2C6B_HUMAN	K.DVDAAYM(+15.99)NK.V	N	60.45	1041.44	0.6	521.729	2	18.65	2551	2	273	281	Oxidation (M)
P04259|K2C6B_HUMAN	K.LLEGEEC(+57.02)R.L	N	60.38	1004.46	1.4	503.238	2	21.37	3346	1	468	475	Carbamidomethylation
P04259|K2C6B_HUMAN	K.NKYEDEINKR.T	N	59.87	1307.65	1.1	654.832	2	18.67	2557	4	251	260
P04259|K2C6B_HUMAN	K.DVDAAYMNK.V	N	59.28	1025.45	0.1	513.732	2	25.28	4532	2	273	281
P04259|K2C6B_HUMAN	R.ALYDAELSQM(+15.99)QTHISDTSVVLSM(+15.99)DNNR.N	N	58.74	3069.4	1.7	1024.14	3	46.91	10878	1	300	326	Oxidation (M)
P04259|K2C6B_HUMAN	K.EYQELM(+15.99)NVK.L	N	57.63	1168.54	1.5	585.28	2	26.86	5005	2	447	455	Oxidation (M)
P04259|K2C6B_HUMAN	K.FASFIDK.V	N	56.09	826.423	1.3	414.219	2	38.21	8344	2	174	180
P04259|K2C6B_HUMAN	R.SLYGLGGSK.R	N	53.76	880.465	0.4	441.24	2	32.55	6689	2	60	68
P04259|K2C6B_HUMAN	K.NKYEDEINK.R	N	53.55	1151.55	1.5	576.781	2	18.81	2598	3	251	259
P04259|K2C6B_HUMAN	R.RGFSANSAR.L	N	52.15	964.484	0.5	483.25	2	14.75	1405	2	16	24
P04259|K2C6B_HUMAN	R.NMQDLVEDLK.N	N	51.08	1203.58	0.6	602.798	2	51.31	12129	2	241	250
P04259|K2C6B_HUMAN	R.QNLEPLFEQYINNLR.R	N	50.06	1889.96	2.8	945.992	2	70.33	17456	3	208	222
P04259|K2C6B_HUMAN	R.QLDNIVGER.G	Y	48.84	1042.54	2.9	522.279	2	31.63	6419	1	224	232
P04259|K2C6B_HUMAN	K.VLDTKWTLLQEQGTK.T	N	48.3	1758.95	1.8	587.326	3	46.9	10877	1	190	204
P04259|K2C6B_HUMAN	R.LRSEIDHVK.K	N	47.92	1095.6	0.4	366.209	3	16.74	1981	2	391	399
P04259|K2C6B_HUMAN	K.YEDEINKR.T	N	45.15	1065.51	0.9	533.762	2	15.95	1751	3	253	260
P04259|K2C6B_HUMAN	K.LALDVEIATYRK.L	N	44.53	1390.78	1.9	464.602	3	45.86	10570	2	456	467
P04259|K2C6B_HUMAN	R.GRLDSELR.N	N	43.32	944.504	0.7	473.26	2	21.8	3475	2	233	240
P04259|K2C6B_HUMAN	R.NM(+15.99)QDLVEDLK.N	N	42.62	1219.58	1.4	610.796	2	38.58	8452	2	241	250	Oxidation (M)
P04259|K2C6B_HUMAN	R.KLLEGEEC(+57.02)R.L	N	39.06	1132.55	-0.5	378.525	3	19.16	2704	2	467	475	Carbamidomethylation
P04259|K2C6B_HUMAN	R.FLEQQNK.V	N	38.16	905.461	1.3	453.738	2	18.94	2638	2	183	189
P04259|K2C6B_HUMAN	K.VRFLEQQNK.V	N	35.58	1160.63	0.9	581.323	2	24.87	4410	3	181	189
P04259|K2C6B_HUMAN	R.LRSEIDHVKK.Q	N	34.69	1223.7	0.6	408.907	3	14.65	1373	2	391	400
P01011|AACT_HUMAN	K.AVLDVFEEGTEASAATAVK.I	Y	101.89	1906.95	0.8	954.484	2	55.04	13172	4	361	379
P01011|AACT_HUMAN	R.LYGSEAFATDFQDSAAAK.K	Y	92.36	1890.86	1.9	946.441	2	49.36	11576	4	160	177
P01011|AACT_HUMAN	K.RLYGSEAFATDFQDSAAAK.K	Y	86.35	2046.96	2.1	1024.49	2	44.06	10046	7	159	177
P01011|AACT_HUMAN	K.RLYGSEAFATDFQDSAAAKK.L	Y	78.6	2175.06	1.3	726.028	3	40.25	8933	4	159	178
P01011|AACT_HUMAN	K.ITLLSALVETR.T	Y	78.11	1214.72	1.2	608.37	2	62.95	15398	2	380	390
P01011|AACT_HUMAN	K.DLDSQTM(+15.99)M(+15.99)VLVNYIFFK.A	Y	76.84	2095	0.5	1048.51	2	76.36	19025	6	198	214	Oxidation (M)
P01011|AACT_HUMAN	K.EQLSLLDRFTEDAK.R	Y	74.14	1663.84	0.7	832.929	2	53.46	12732	4	145	158
P01011|AACT_HUMAN	R.DSLEFREIGELYLPK.F	Y	71.89	1807.94	3	603.654	3	60.48	14712	2	301	315
P01011|AACT_HUMAN	R.NLAVSQVVHK.A	Y	69.42	1093.62	1.1	547.82	2	27.57	5213	4	351	360
P01011|AACT_HUMAN	K.ADLSGITGAR.N	Y	67.36	959.504	1.8	480.76	2	30.55	6095	2	341	350
P01011|AACT_HUMAN	K.AKWEMPFDPQDTHQSR.F	Y	65.45	1971.89	0.8	658.304	3	43.28	9821	2	215	230
P01011|AACT_HUMAN	R.LYGSEAFATDFQDSAAAKK.L	Y	64.66	2018.96	1.5	673.994	3	44.86	10279	2	160	178
P01011|AACT_HUMAN	K.AKWEM(+15.99)PFDPQDTHQSR.F	Y	61.96	1987.88	0.1	663.636	3	33.64	7004	4	215	230	Oxidation (M)
P01011|AACT_HUMAN	R.EIGELYLPK.F	Y	60.18	1060.58	1.2	531.298	2	46.43	10737	2	307	315
P01011|AACT_HUMAN	R.DYNLNDILLQLGIEEAFTSK.A	Y	59.86	2295.16	0	1148.59	2	86.02	20614	5	321	340
P01011|AACT_HUMAN	R.FNRPFLM(+15.99)IIVPTDTQNIFFM(+15.99)SK.V	Y	56.45	2690.36	1.1	897.795	3	69.88	17330	2	395	416	Oxidation (M)
P01011|AACT_HUMAN	K.LINDYVK.N	Y	48.4	863.475	1	432.745	2	30.34	6032	2	179	185
P01011|AACT_HUMAN	R.WRDSLEFR.E	Y	48.23	1107.55	1.3	370.19	3	38.06	8301	4	299	306
P01011|AACT_HUMAN	K.EQLSLLDR.F	Y	47.84	972.524	1.4	487.27	2	40.18	8912	2	145	152
P01011|AACT_HUMAN	K.KLINDYVK.N	Y	47.8	991.57	1.9	496.793	2	27.79	5276	2	178	185
P01011|AACT_HUMAN	K.WEM(+15.99)PFDPQDTHQSR.F	Y	46.27	1788.75	1.8	597.259	3	36.79	7929	2	217	230	Oxidation (M)
P01011|AACT_HUMAN	R.GKITDLIK.D	Y	44.17	886.549	-0.3	444.281	2	35.08	7418	1	190	197
P01011|AACT_HUMAN	K.EQLSLLDRFTEDAKR.L	Y	43.25	1819.94	1.4	607.656	3	49.7	11675	4	145	159
P01011|AACT_HUMAN	R.WRDSLEFREIGELYLPK.F	Y	41.32	2150.12	0.9	538.537	4	58.61	14184	3	299	315
P01011|AACT_HUMAN	R.DSLEFR.E	Y	40.19	765.366	0.7	383.69	2	30.72	6145	2	301	306
P01011|AACT_HUMAN	K.ITDLIK.D	Y	34.78	701.432	1.2	351.724	2	30.84	6182	2	192	197
P01011|AACT_HUMAN	K.DLDSQTM(+15.99)MVLVNYIFFK.A	Y	32.49	2079.01	2.6	1040.51	2	80.62	19871	3	198	214	Oxidation (M)
P13647|K2C5_HUMAN	R.VSLAGAC(+57.02)GVGGYGSR.S	Y	89.61	1409.67	1	705.844	2	34.86	7358	2	49	63	Carbamidomethylation
P13647|K2C5_HUMAN	R.GLGVGFGSGGGSSSSVK.F	Y	87.31	1438.71	1.8	720.361	2	35.8	7639	3	560	576
P13647|K2C5_HUMAN	R.SFSTASAITPSVSR.T	Y	77.07	1409.72	2	705.866	2	36.86	7951	2	16	29
P13647|K2C5_HUMAN	R.NLDLDSIIAEVK.A	N	74.41	1328.72	0.6	665.367	2	65.43	16091	2	332	343
P13647|K2C5_HUMAN	R.ISISTSGGSFR.N	Y	72.57	1110.57	1.2	556.291	2	35.5	7546	2	74	84
P13647|K2C5_HUMAN	K.YEELQQTAGR.H	Y	70.27	1193.57	0.4	597.791	2	22.42	3662	1	365	374
P13647|K2C5_HUMAN	K.LAELEEALQK.A	Y	68.89	1142.62	0.9	572.317	2	40.97	9141	1	432	441
P13647|K2C5_HUMAN	R.TEAESWYQTK.Y	Y	67.18	1241.56	0.8	621.786	2	31.15	6277	2	355	364
P13647|K2C5_HUMAN	K.LALDVEIATYR.K	N	66.43	1262.69	0.7	632.351	2	52.6	12492	2	461	471
P13647|K2C5_HUMAN	R.NMQDLVEDFK.N	Y	65.39	1237.56	0.9	619.79	2	52.72	12524	2	246	255
P13647|K2C5_HUMAN	R.TTAENEFVM(+15.99)LK.K	Y	61.28	1297.62	1.1	649.819	2	39.91	8837	2	266	276	Oxidation (M)
P13647|K2C5_HUMAN	K.DVDAAYM(+15.99)NK.V	N	60.45	1041.44	0.6	521.729	2	18.65	2551	2	278	286	Oxidation (M)
P13647|K2C5_HUMAN	K.LLEGEEC(+57.02)R.L	N	60.38	1004.46	1.4	503.238	2	21.37	3346	1	473	480	Carbamidomethylation
P13647|K2C5_HUMAN	K.AQYEEIANR.S	Y	59.9	1092.52	0.9	547.268	2	23.74	4064	2	344	352
P13647|K2C5_HUMAN	K.NKYEDEINKR.T	N	59.87	1307.65	1.1	654.832	2	18.67	2557	4	256	265
P13647|K2C5_HUMAN	K.DVDAAYMNK.V	N	59.28	1025.45	0.1	513.732	2	25.28	4532	2	278	286
P13647|K2C5_HUMAN	R.SLYNLGGSKR.I	Y	57.42	1093.59	2.1	547.802	2	26.81	4990	3	64	73
P13647|K2C5_HUMAN	K.FASFIDK.V	N	56.09	826.423	1.3	414.219	2	38.21	8344	2	179	185
P13647|K2C5_HUMAN	R.SRTEAESWYQTK.Y	Y	55.54	1484.69	2.3	495.905	3	27.48	5189	3	353	364
P13647|K2C5_HUMAN	R.QLDSIVGER.G	N	55.22	1015.53	1.9	508.773	2	32.21	6591	2	229	237
P13647|K2C5_HUMAN	K.HEISEMNR.M	Y	55.15	1014.46	1.5	508.236	2	15.96	1757	1	384	391
P13647|K2C5_HUMAN	K.NKYEDEINK.R	N	53.55	1151.55	1.5	576.781	2	18.81	2598	3	256	264
P13647|K2C5_HUMAN	R.QNLEPLFEQYINNLR.R	N	50.06	1889.96	2.8	945.992	2	70.33	17456	3	213	227
P13647|K2C5_HUMAN	R.LRAEIDNVKK.Q	Y	48.96	1184.69	1.2	395.904	3	18.82	2601	2	396	405
P13647|K2C5_HUMAN	R.EYQELM(+15.99)NTK.L	Y	48.37	1170.52	0.5	586.269	2	20.63	3129	2	452	460	Oxidation (M)
P13647|K2C5_HUMAN	K.VLDTKWTLLQEQGTK.T	N	48.3	1758.95	1.8	587.326	3	46.9	10877	1	195	209
P13647|K2C5_HUMAN	R.LLREYQELM(+15.99)NTK.L	Y	46.31	1552.79	0.3	518.605	3	32.84	6773	1	449	460	Oxidation (M)
P13647|K2C5_HUMAN	R.LLREYQELMNTK.L	Y	45.98	1536.8	2.9	513.274	3	41.96	9430	1	449	460
P13647|K2C5_HUMAN	K.YEDEINKR.T	N	45.15	1065.51	0.9	533.762	2	15.95	1751	3	258	265
P13647|K2C5_HUMAN	K.LALDVEIATYRK.L	N	44.53	1390.78	1.9	464.602	3	45.86	10570	2	461	472
P13647|K2C5_HUMAN	R.GRLDSELR.N	N	43.32	944.504	0.7	473.26	2	21.8	3475	2	238	245
P13647|K2C5_HUMAN	R.RQLDSIVGER.G	N	42.94	1171.63	0.6	586.823	2	28.19	5395	1	228	237
P13647|K2C5_HUMAN	R.KLLEGEEC(+57.02)R.L	N	39.06	1132.55	-0.5	378.525	3	19.16	2704	2	472	480	Carbamidomethylation
P13647|K2C5_HUMAN	R.TTAENEFVM(+15.99)LKK.D	Y	39.06	1425.72	1	476.247	3	33.05	6832	3	266	277	Oxidation (M)
P13647|K2C5_HUMAN	R.SLYNLGGSK.R	Y	38.62	937.487	1.6	469.752	2	32.29	6615	1	64	72
P13647|K2C5_HUMAN	R.FLEQQNK.V	N	38.16	905.461	1.3	453.738	2	18.94	2638	2	188	194
P13647|K2C5_HUMAN	K.VRFLEQQNK.V	N	35.58	1160.63	0.9	581.323	2	24.87	4410	3	186	194
P13647|K2C5_HUMAN	R.LRAEIDNVK.K	Y	33.27	1056.59	-0.8	353.205	3	23.32	3936	1	396	404
Q14624|ITIH4_HUMAN	R.ANTVQEATFQM(+15.99)ELPK.K	Y	89.25	1721.83	1.3	861.923	2	41.84	9392	4	61	75	Oxidation (M)
Q14624|ITIH4_HUMAN	R.NM(+15.99)EQFQVSVSVAPNAK.I	Y	87.43	1763.85	1.2	882.934	2	40.61	9039	4	124	139	Oxidation (M)
Q14624|ITIH4_HUMAN	R.ANTVQEATFQMELPK.K	Y	86.43	1705.83	0.9	853.925	2	50.05	11772	4	61	75
Q14624|ITIH4_HUMAN	K.SPEQQETVLDGNLIIR.Y	Y	83.88	1810.94	1.3	906.48	2	51.83	12270	6	225	240
Q14624|ITIH4_HUMAN	K.EKAEAQAQYSAAVAK.G	Y	82.49	1563.79	0.9	782.903	2	20.6	3118	4	97	111
Q14624|ITIH4_HUMAN	K.NGIDIYSLTVDSR.V	Y	81.05	1451.73	1.3	726.871	2	53.62	12775	2	31	43
Q14624|ITIH4_HUMAN	K.AEAQAQYSAAVAK.G	Y	80.04	1306.65	-0.1	654.333	2	22.48	3681	2	99	111
Q14624|ITIH4_HUMAN	R.ANTVQEATFQM(+15.99)ELPKK.A	Y	79.82	1849.92	1.9	925.971	2	35.18	7453	5	61	76	Oxidation (M)
Q14624|ITIH4_HUMAN	R.NMEQFQVSVSVAPNAK.I	Y	78.33	1747.86	1.2	874.937	2	45.64	10507	4	124	139
Q14624|ITIH4_HUMAN	K.ITFELVYEELLK.R	Y	77.62	1495.82	0.6	748.916	2	74.71	18609	3	140	151
Q14624|ITIH4_HUMAN	R.VVNRANTVQEATFQM(+15.99)ELPK.K	Y	68.54	2190.11	-0.1	731.044	3	39.39	8684	2	57	75	Oxidation (M)
Q14624|ITIH4_HUMAN	R.FAHTVVTSR.V	Y	66.37	1016.54	1.5	509.278	2	19.57	2819	2	48	56
Q14624|ITIH4_HUMAN	K.LALDNGGLAR.R	Y	65.03	998.551	2.3	500.284	2	33.98	7106	2	429	438
Q14624|ITIH4_HUMAN	R.AISGGSIQIENGYFVHYFAPEGLTTMPK.N	Y	63.4	3026.48	2.3	1009.84	3	65.74	16178	1	246	273
Q14624|ITIH4_HUMAN	R.LGVYELLLK.V	Y	62.83	1046.64	0.9	524.327	2	60.62	14747	2	154	162
Q14624|ITIH4_HUMAN	K.NVVFVIDK.S	Y	61.87	932.533	2.9	467.275	2	43.04	9749	4	274	281
Q14624|ITIH4_HUMAN	K.ILDDLSPR.D	Y	61.1	927.503	1.8	464.759	2	35.15	7441	2	300	307
Q14624|ITIH4_HUMAN	R.ANTVQEATFQMELPKK.A	Y	60.93	1833.93	0.6	917.972	2	42.65	9637	3	61	76
Q14624|ITIH4_HUMAN	R.AISGGSIQIENGYFVHYFAPEGLTTM(+15.99)PK.N	Y	60.44	3042.48	2.3	1015.17	3	62.95	15399	4	246	273	Oxidation (M)
Q14624|ITIH4_HUMAN	R.VVNRANTVQEATFQM(+15.99)ELPKK.A	Y	59.76	2318.21	3.5	773.745	3	33.81	7056	3	57	76	Oxidation (M)
Q14624|ITIH4_HUMAN	R.DQFNLIVFSTEATQWRPSLVPASAENVNK.A	Y	56.98	3260.65	2.4	1087.89	3	73.21	18241	3	308	336
Q14624|ITIH4_HUMAN	R.LPEGSVSLIILLTDGDPTVGETNPR.S	Y	53.83	2592.36	-0.4	865.128	3	75.07	18706	1	372	396
Q14624|ITIH4_HUMAN	R.FKPTLSQQQK.S	Y	51.9	1203.66	1.2	602.839	2	21.44	3367	4	215	224
Q14624|ITIH4_HUMAN	K.SPEQQETVLDGNLIIRYDVDR.A	Y	47.95	2459.23	1.4	820.751	3	54.07	12904	2	225	245
Q14624|ITIH4_HUMAN	R.RLGVYELLLK.V	Y	47.74	1202.74	0.3	401.92	3	53.32	12693	4	153	162
Q14624|ITIH4_HUMAN	R.SIQNNVR.E	Y	46.83	829.441	0.1	415.728	2	15.29	1559	2	397	403
Q14624|ITIH4_HUMAN	K.VRPQQLVK.H	Y	41.83	966.597	1.1	484.307	2	20.47	3080	2	163	170
Q14624|ITIH4_HUMAN	K.ITFELVYEELLKR.R	Y	34.09	1651.92	2.9	826.969	2	68.77	17027	3	140	152
Q14624|ITIH4_HUMAN	K.RRLGVYELLLK.V	Y	28.49	1358.84	1.3	453.954	3	47.24	10969	2	152	162
P01023|A2MG_HUMAN	K.ALLAYAFALAGNQDK.R	Y	82.05	1564.82	0.5	783.42	2	63.7	15610	4	1148	1162
P01023|A2MG_HUMAN	R.IAQWQSFQLEGGLK.Q	Y	80.57	1603.84	1	802.926	2	54.84	13116	2	175	188
P01023|A2MG_HUMAN	R.LLLQQVSLPELPGEYSM(+15.99)K.V	Y	78.37	2060.09	2.3	1031.05	2	63.58	15577	4	1298	1315	Oxidation (M)
P01023|A2MG_HUMAN	K.AAQVTIQSSGTFSSK.F	Y	77.96	1510.76	1.6	756.39	2	31.8	6471	2	1275	1289
P01023|A2MG_HUMAN	K.NEDSLVFVQTDK.S	Y	76.01	1393.67	2.3	697.845	2	41.93	9419	2	124	135
P01023|A2MG_HUMAN	R.NQGNTWLTAFVLK.T	N	75.17	1490.79	0.9	746.402	2	67.39	16637	2	1035	1047
P01023|A2MG_HUMAN	K.HYDGSYSTFGER.Y	Y	73.49	1417.59	1.9	709.803	2	27.36	5152	1	1020	1031
P01023|A2MG_HUMAN	K.LHTEAQIQEEGTVVELTGR.Q	Y	70.84	2109.07	0.9	704.031	3	42.08	9465	2	320	338
P01023|A2MG_HUMAN	K.QFSFPLSSEPFQGSYK.V	Y	68.29	1847.87	1.6	924.945	2	59.65	14478	2	189	204
P01023|A2MG_HUMAN	R.SSGSLLNNAIK.G	N	67.55	1102.6	0.8	552.307	2	36.35	7799	2	1082	1092
P01023|A2MG_HUMAN	K.VTGEGC(+57.02)VYLQTSLK.Y	Y	67.39	1553.78	1.6	777.896	2	41.08	9177	1	1316	1329	Carbamidomethylation
P01023|A2MG_HUMAN	R.TEHPFTVEEFVLPK.F	Y	66.18	1671.85	0.8	558.291	3	55.63	13343	2	215	228
P01023|A2MG_HUMAN	R.NALFC(+57.02)LESAWK.T	Y	66.11	1337.64	1.1	669.83	2	60.87	14817	2	1123	1133	Carbamidomethylation
P01023|A2MG_HUMAN	K.QQNAQGGFSSTQDTVVALHALSK.Y	Y	65.91	2386.19	2.5	796.405	3	47.31	10993	2	1241	1263
P01023|A2MG_HUMAN	K.FEVQVTVPK.I	Y	64.77	1045.58	0.4	523.798	2	42.63	9633	3	229	237
P01023|A2MG_HUMAN	K.AIGYLNTGYQR.Q	Y	64.61	1254.64	1.4	628.326	2	36.42	7819	2	1004	1014
P01023|A2MG_HUMAN	K.SSSNEEVM(+15.99)FLTVQVK.G	Y	62.68	1712.83	0.7	857.422	2	50.15	11800	1	94	108	Oxidation (M)
P01023|A2MG_HUMAN	R.TEVSSNHVLIYLDK.V	Y	60.12	1616.84	1.6	539.955	3	43.28	9824	2	1408	1421
P01023|A2MG_HUMAN	K.YGAATFTR.T	N	56.13	885.434	0.7	443.725	2	26.17	4795	1	1264	1271
P01023|A2MG_HUMAN	R.QGIPFFGQVR.L	Y	55.87	1147.61	2.1	574.815	2	55.94	13429	2	361	370
P01023|A2MG_HUMAN	R.VGFYESDVM(+15.99)GR.G	Y	54.78	1274.56	0	638.287	2	34.17	7163	1	705	715	Oxidation (M)
P01023|A2MG_HUMAN	K.VYDYYETDEFAIAEYNAPC(+57.02)SK.D	Y	54.48	2547.08	0.8	850.034	3	54.79	13106	1	1449	1469	Carbamidomethylation
P01023|A2MG_HUMAN	R.LLLQQVSLPELPGEYSMK.V	Y	53.14	2044.09	-2.1	1023.05	2	66.6	16421	4	1298	1315
P01023|A2MG_HUMAN	K.TAQEGDHGSHVYTK.A	Y	51.03	1528.69	1	510.571	3	13.23	970	5	1134	1147
P01023|A2MG_HUMAN	K.FQVDNNNR.L	Y	49.23	1005.46	1.7	503.74	2	18.8	2595	1	1290	1297
P01023|A2MG_HUMAN	K.M(+15.99)VSGFIPLKPTVK.M	N	44.71	1431.82	2.6	478.281	3	43.05	9754	2	1385	1397	Oxidation (M)
P01023|A2MG_HUMAN	K.SIYKPGQTVK.F	Y	44.2	1119.63	0	560.822	2	20.27	3020	4	136	145
P01023|A2MG_HUMAN	R.KYSDASDC(+57.02)HGEDSQAFC(+57.02)EK.F	Y	43.17	2232.87	1.1	745.298	3	20.99	3235	2	271	289	Carbamidomethylation
P01023|A2MG_HUMAN	R.SASNM(+15.99)AIVDVK.M	Y	39.63	1149.57	1.6	575.793	2	26.86	5006	1	1374	1384	Oxidation (M)
P01023|A2MG_HUMAN	R.SLFTDLEAENDVLHC(+57.02)VAFAVPK.S	Y	37.65	2474.22	1	825.746	3	73.18	18233	1	72	93	Carbamidomethylation
P01023|A2MG_HUMAN	R.VVSM(+15.99)DENFHPLNELIPLVYIQDPK.G	Y	36.94	2825.43	0.2	942.818	3	70.52	17505	1	148	171	Oxidation (M)
P01023|A2MG_HUMAN	K.YNILPEKEEFPFALGVQTLPQTC(+57.02)DEPK.A	Y	36.83	3162.56	-0.5	1055.19	3	65.17	16018	2	1330	1356	Carbamidomethylation
P01857|IGHG1_HUMAN	R.TPEVTC(+57.02)VVVDVSHEDPEVK.F	Y	97.88	2138.02	1.4	1070.02	2	46.67	10809	5	139	157	Carbamidomethylation
P01857|IGHG1_HUMAN	K.THTC(+57.02)PPC(+57.02)PAPELLGGPSVFLFPPKPK.D	Y	86.78	2843.45	2.2	948.826	3	61.09	14878	12	106	131	Carbamidomethylation
P01857|IGHG1_HUMAN	R.VVSVLTVLHQDWLNGK.E	N	85.86	1807	1.9	904.509	2	65.74	16177	4	185	200
P01857|IGHG1_HUMAN	K.TTPPVLDSDGSFFLYSK.L	Y	83.94	1872.91	0	937.465	2	60.08	14600	15	276	292
P01857|IGHG1_HUMAN	K.GFYPSDIAVEWESNGQPENNYK.T	N	82.88	2543.12	1	1272.57	2	58	14014	2	254	275
P01857|IGHG1_HUMAN	K.FNWYVDGVEVHNAK.T	Y	79.16	1676.79	0.9	839.405	2	46.31	10702	5	158	171
P01857|IGHG1_HUMAN	K.STSGGTAALGC(+57.02)LVK.D	N	71.94	1320.67	-0.7	661.342	2	39.35	8675	4	17	30	Carbamidomethylation
P01857|IGHG1_HUMAN	K.GPSVFPLAPSSKSTSGGTAALGC(+57.02)LVK.D	Y	70.35	2488.3	0.8	830.441	3	54.83	13114	2	5	30	Carbamidomethylation
P01857|IGHG1_HUMAN	R.EPQVYTLPPSRDELTK.N	Y	69.11	1871.96	1	936.99	2	38.81	8519	18	228	243
P01857|IGHG1_HUMAN	K.NQVSLTC(+57.02)LVK.G	N	66.95	1160.62	1.1	581.319	2	43.62	9917	2	244	253	Carbamidomethylation
P01857|IGHG1_HUMAN	K.GQPREPQVYTLPPSRDELTK.N	Y	65.01	2310.2	1.4	771.074	3	35.43	7525	23	224	243
P01857|IGHG1_HUMAN	K.GPSVFPLAPSSK.S	Y	63.96	1185.64	1.8	593.828	2	44.59	10201	2	5	16
P01857|IGHG1_HUMAN	R.EPQVYTLPPSR.D	N	60.76	1285.67	1.7	643.842	2	35.32	7493	4	228	238
P01857|IGHG1_HUMAN	K.SRWQQGNVFSC(+57.02)SVMHEALHNHYTQK.S	N	58.38	3043.39	1	761.856	4	42.85	9695	4	298	322	Carbamidomethylation
P01857|IGHG1_HUMAN	K.ALPAPIEK.T	N	57.2	837.496	1.3	419.756	2	29.19	5696	2	210	217
P01857|IGHG1_HUMAN	K.DTLMISR.T	N	53.48	834.427	1.5	418.221	2	31.32	6326	2	132	138
P01857|IGHG1_HUMAN	K.GQPREPQVYTLPPSR.D	N	52.41	1723.9	1	575.641	3	32.56	6691	4	224	238
P01857|IGHG1_HUMAN	K.DTLM(+15.99)ISR.T	N	47.59	850.422	1.5	426.219	2	28.58	5509	9	132	138	Oxidation (M)
P01857|IGHG1_HUMAN	K.SRWQQGNVFSC(+57.02)SVM(+15.99)HEALHNHYTQK.S	N	46.93	3059.39	1.9	765.856	4	35.64	7587	6	298	322	Carbamidomethylation; Oxidation (M)
P01857|IGHG1_HUMAN	R.WQQGNVFSC(+57.02)SVMHEALHNHYTQK.S	N	39.94	2800.26	0.7	934.428	3	45.23	10387	5	300	322	Carbamidomethylation
P01857|IGHG1_HUMAN	K.NQVSLTCLVK.G	N	38.64	1103.6	2.4	552.809	2	52.46	12453	1	244	253
P01857|IGHG1_HUMAN	R.WQQGNVFSC(+57.02)SVM(+15.99)HEALHNHYTQK.S	N	36.92	2816.25	0.7	939.76	3	37.53	8149	6	300	322	Carbamidomethylation; Oxidation (M)
P02749|APOH_HUMAN	K.C(+57.02)SYTEDAQC(+57.02)IDGTIEVPK.C	Y	94.86	2084.9	0.3	1043.46	2	44.79	10260	4	307	324	Carbamidomethylation
P02749|APOH_HUMAN	K.ATFGC(+57.02)HDGYSLDGPEEIEC(+57.02)TK.L	Y	89.63	2384.99	2.3	1193.5	2	41.79	9381	5	230	250	Carbamidomethylation
P02749|APOH_HUMAN	K.KC(+57.02)SYTEDAQC(+57.02)IDGTIEVPK.C	Y	89.58	2213	1.8	1107.51	2	40.55	9021	5	306	324	Carbamidomethylation
P02749|APOH_HUMAN	K.TFYEPGEEITYSC(+57.02)KPGYVSR.G	Y	88.72	2382.08	0.5	1192.05	2	42.73	9662	4	39	58	Carbamidomethylation
P02749|APOH_HUMAN	R.VC(+57.02)PFAGILENGAVR.Y	Y	79.59	1501.77	2	751.894	2	56.89	13698	4	83	96	Carbamidomethylation
P02749|APOH_HUMAN	R.TC(+57.02)PKPDDLPFSTVVPLK.T	Y	77.02	1913	2.2	957.508	2	54.44	13005	4	22	38	Carbamidomethylation
P02749|APOH_HUMAN	K.FIC(+57.02)PLTGLWPINTLK.C	Y	73.14	1771.97	2.7	886.994	2	75.57	18833	7	64	78	Carbamidomethylation
P02749|APOH_HUMAN	K.C(+57.02)PFPSRPDNGFVNYPAKPTLYYK.D	Y	69.46	2730.33	1.9	911.118	3	46.96	10891	4	205	227	Carbamidomethylation
P02749|APOH_HUMAN	R.YTTFEYPNTISFSC(+57.02)NTGFYLNGADSAK.C	Y	66.95	3067.35	3.2	1023.46	3	63.2	15470	2	97	123	Carbamidomethylation
P02749|APOH_HUMAN	K.KATVVYQGER.V	Y	65.18	1149.61	1.1	575.815	2	17.31	2150	4	270	279
P02749|APOH_HUMAN	K.WSPELPVC(+57.02)APIIC(+57.02)PPPSIPTFATLR.V	Y	64	2818.45	2.4	940.495	3	75.32	18773	5	130	154	Carbamidomethylation
P02749|APOH_HUMAN	K.TDASDVKPC(+57.02)	Y	55.88	991.428	0.9	496.722	2	16.14	1808	2	337	345	Carbamidomethylation
P02749|APOH_HUMAN	K.EHSSLAFWK.T	Y	55.76	1103.54	0.3	552.777	2	42.14	9479	4	328	336
P02749|APOH_HUMAN	R.KFIC(+57.02)PLTGLWPINTLK.C	Y	55.61	1900.06	1.5	634.363	3	68.44	16932	4	63	78	Carbamidomethylation
P02749|APOH_HUMAN	K.ATVVYQGERVK.I	Y	52.89	1248.68	1	625.349	2	21.58	3412	3	271	281
P02749|APOH_HUMAN	K.ATVVYQGER.V	Y	49.08	1021.52	-0.2	511.767	2	21.98	3530	1	271	279
P02749|APOH_HUMAN	K.VSFFC(+57.02)K.N	Y	45.05	786.373	0.7	394.194	2	37.55	8153	2	296	301	Carbamidomethylation
P02749|APOH_HUMAN	K.KATVVYQGERVK.I	Y	40.27	1376.78	1.3	459.934	3	17.97	2348	2	270	281
P02749|APOH_HUMAN	K.C(+57.02)TEEGKWSPELPVC(+57.02)APIIC(+57.02)PPPSIPTFATLR.V	Y	33.12	3522.73	5.8	1175.26	3	70.23	17427	3	124	154	Carbamidomethylation
P02749|APOH_HUMAN	K.C(+57.02)SYTEDA(+156.12)QC(+57.02)IDGTIEVPK.C	Y	27.19	2241.02	5.3	748.017	3	41.16	9200	2	307	324	Carbamidomethylation; SL-HNE (A)
P01876|IGHA1_HUMAN	R.QEPSQGTTTFAVTSILR.V	N	90.55	1834.94	1.6	918.48	2	55.48	13298	6	283	299
P01876|IGHA1_HUMAN	K.GDTFSC(+57.02)MVGHEALPLAFTQK.T	N	86.34	2208.03	1.3	1105.03	2	58.01	14016	4	308	327	Carbamidomethylation
P01876|IGHA1_HUMAN	K.GDTFSC(+57.02)M(+15.99)VGHEALPLAFTQK.T	N	81.3	2224.03	1.1	1113.02	2	52.06	12338	13	308	327	Carbamidomethylation; Oxidation (M)
P01876|IGHA1_HUMAN	R.DASGVTFTWTPSSGK.S	Y	77.58	1539.72	0.4	770.868	2	47.51	11052	4	154	168
P01876|IGHA1_HUMAN	K.TFTC(+57.02)TAAYPESK.T	Y	76.96	1374.61	1.2	688.314	2	28.92	5613	4	201	212	Carbamidomethylation
P01876|IGHA1_HUMAN	K.YLTWASRQEPSQGTTTFAVTSILR.V	N	76.44	2712.39	-0.6	905.136	3	59.86	14538	2	276	299
P01876|IGHA1_HUMAN	K.KGDTFSC(+57.02)MVGHEALPLAFTQK.T	N	72.39	2336.13	2.4	779.719	3	53.55	12755	4	307	327	Carbamidomethylation
P01876|IGHA1_HUMAN	R.WLQGSQELPREK.Y	N	71.14	1469.76	1.8	735.89	2	32.19	6585	4	264	275
P01876|IGHA1_HUMAN	K.KGDTFSC(+57.02)M(+15.99)VGHEALPLAFTQK.T	N	69.36	2352.12	0.9	785.049	3	47.82	11144	12	307	327	Carbamidomethylation; Oxidation (M)
P01876|IGHA1_HUMAN	K.SAVQGPPERDLC(+57.02)GC(+57.02)YSVSSVLPGC(+57.02)AEPWNHGK.T	Y	68.73	3513.59	1.6	1172.2	3	50.64	11938	4	169	200	Carbamidomethylation
P01876|IGHA1_HUMAN	R.NFPPSQDASGDLYTTSSQLTLPATQC(+57.02)LAGK.S	Y	68.44	3167.51	2.2	1056.85	3	59.56	14453	21	52	81	Carbamidomethylation
P01876|IGHA1_HUMAN	K.SAVQGPPER.D	N	66.12	939.477	0.8	470.746	2	16.38	1875	2	169	177
P01876|IGHA1_HUMAN	R.WLQGSQELPR.E	N	64.88	1212.63	1.5	607.321	2	38.08	8306	2	264	273
P01876|IGHA1_HUMAN	R.DLC(+57.02)GC(+57.02)YSVSSVLPGC(+57.02)AEPWNHGK.T	Y	64.64	2592.12	1.9	865.049	3	53.54	12753	2	178	200	Carbamidomethylation
P01876|IGHA1_HUMAN	K.SGNTFRPEVHLLPPPSEELALNELVTLTC(+57.02)LAR.G	N	64.56	3572.87	1.6	1191.96	3	77.67	19298	9	222	253	Carbamidomethylation
P01876|IGHA1_HUMAN	K.TPLTATLSK.S	Y	64.24	930.539	1.1	466.277	2	31.18	6284	4	213	221
P01876|IGHA1_HUMAN	K.YLTWASR.Q	N	59.3	895.455	1	448.735	2	37.28	8069	2	276	282
P01876|IGHA1_HUMAN	R.VAAEDWK.K	N	55.64	817.397	0.9	409.706	2	23.66	4038	2	300	306
P01876|IGHA1_HUMAN	K.TFTC(+57.02)TAAYPESKTPLTATLSK.S	Y	55.4	2287.14	2	763.389	3	43.88	9996	2	201	221	Carbamidomethylation
P01876|IGHA1_HUMAN	R.VAAEDWKK.G	N	53.44	945.492	1.7	473.754	2	18.37	2465	2	300	307
P01860|IGHG3_HUMAN	R.TPEVTC(+57.02)VVVDVSHEDPEVQFK.W	Y	92.32	2413.15	2.6	1207.58	2	53.41	12719	5	186	206	Carbamidomethylation
P01860|IGHG3_HUMAN	R.VVSVLTVLHQDWLNGK.E	N	85.86	1807	1.9	904.509	2	65.74	16177	4	232	247
P01860|IGHG3_HUMAN	K.TPLGDTTHTC(+57.02)PR.C	Y	79.54	1354.63	0.9	678.323	2	19.72	2862	4	102	113	Carbamidomethylation
P01860|IGHG3_HUMAN	K.WYVDGVEVHNAK.T	Y	78.73	1415.68	2	708.85	2	36.77	7923	8	207	218
P01860|IGHG3_HUMAN	R.C(+57.02)PAPELLGGPSVFLFPPKPK.D	Y	76.21	2150.16	2.4	717.729	3	64.08	15715	4	159	178	Carbamidomethylation
P01860|IGHG3_HUMAN	R.STSGGTAALGC(+57.02)LVK.D	N	71.94	1320.67	-0.7	661.342	2	39.35	8675	4	17	30	Carbamidomethylation
P01860|IGHG3_HUMAN	K.GPSVFPLAPC(+57.02)SR.S	N	71.3	1286.64	0.6	644.33	2	46.94	10883	2	5	16	Carbamidomethylation
P01860|IGHG3_HUMAN	K.SC(+57.02)DTPPPC(+57.02)PR.C	Y	70.69	1185.49	1.3	593.753	2	17.37	2169	4	119	128	Carbamidomethylation
P01860|IGHG3_HUMAN	K.NQVSLTC(+57.02)LVK.G	N	66.95	1160.62	1.1	581.319	2	43.62	9917	2	291	300	Carbamidomethylation
P01860|IGHG3_HUMAN	K.GQPREPQVYTLPPSREEMTK.N	N	64.61	2342.17	1.1	781.731	3	34.28	7196	17	271	290
P01860|IGHG3_HUMAN	R.EPQVYTLPPSR.E	N	60.76	1285.67	1.7	643.842	2	35.32	7493	4	275	285
P01860|IGHG3_HUMAN	R.EPQVYTLPPSREEM(+15.99)TK.N	N	60.7	1919.93	1.4	960.973	2	30.8	6172	15	275	290	Oxidation (M)
P01860|IGHG3_HUMAN	K.GQPREPQVYTLPPSREEM(+15.99)TK.N	N	57.82	2358.16	1.2	787.063	3	29.36	5751	20	271	290	Oxidation (M)
P01860|IGHG3_HUMAN	K.ALPAPIEK.T	N	57.2	837.496	1.3	419.756	2	29.19	5696	2	257	264
P01860|IGHG3_HUMAN	R.EPQVYTLPPSREEMTK.N	N	55.31	1903.93	2.4	952.977	2	35.12	7436	13	275	290
P01860|IGHG3_HUMAN	K.DTLMISR.T	N	53.48	834.427	1.5	418.221	2	31.32	6326	2	179	185
P01860|IGHG3_HUMAN	K.SRWQQGNIFSC(+57.02)SVM(+15.99)HEALHNR.F	Y	53.34	2572.18	0.8	858.402	3	38.69	8486	5	345	365	Carbamidomethylation; Oxidation (M)
P01860|IGHG3_HUMAN	K.GQPREPQVYTLPPSR.E	N	52.41	1723.9	1	575.641	3	32.56	6691	4	271	285
P01860|IGHG3_HUMAN	K.DTLM(+15.99)ISR.T	N	47.59	850.422	1.5	426.219	2	28.58	5509	9	179	185	Oxidation (M)
P01860|IGHG3_HUMAN	R.WQQGNIFSC(+57.02)SVMHEALHNR.F	Y	44.17	2313.05	0.6	579.271	4	49.19	11532	3	347	365	Carbamidomethylation
P01860|IGHG3_HUMAN	K.SRWQQGNIFSC(+57.02)SVMHEALHNR.F	Y	42.41	2556.19	1.1	640.055	4	45.87	10573	4	345	365	Carbamidomethylation
P01860|IGHG3_HUMAN	K.TKPREEQYNSTFR.V	Y	41.99	1654.81	0.1	552.609	3	19.36	2760	2	219	231
P01860|IGHG3_HUMAN	K.NQVSLTCLVK.G	N	38.64	1103.6	2.4	552.809	2	52.46	12453	1	291	300
P01860|IGHG3_HUMAN	R.WQQGNIFSC(+57.02)SVM(+15.99)HEALHNR.F	Y	30.14	2329.05	0.1	583.269	4	41.28	9233	3	347	365	Carbamidomethylation; Oxidation (M)
P0C0L5|CO4B_HUMAN	R.ALEILQEEDLIDEDDIPVR.S	Y	88.11	2224.11	2.3	1113.07	2	63.94	15675	4	757	775
P0C0L5|CO4B_HUMAN	R.LLATLC(+57.02)SAEVC(+57.02)QC(+57.02)AEGK.C	Y	83.37	1908.87	0.4	955.445	2	42.8	9684	1	1578	1594	Carbamidomethylation
P0C0L5|CO4B_HUMAN	R.VTASDPLDTLGSEGALSPGGVASLLR.L	Y	75.36	2482.29	2.6	828.44	3	70.82	17590	5	980	1005
P0C0L5|CO4B_HUMAN	R.C(+57.02)SVFYGAPSK.S	Y	74.12	1114.51	1.1	558.264	2	31.71	6442	2	1566	1575	Carbamidomethylation
P0C0L5|CO4B_HUMAN	K.ASAGLLGAHAAAITAYALTLTK.A	Y	72.19	2084.16	1.2	695.729	3	65.59	16136	3	1183	1204
P0C0L5|CO4B_HUMAN	R.HLVPGAPFLLQALVR.E	Y	68.9	1629.97	2	544.332	3	68.82	17037	4	377	391
P0C0L5|CO4B_HUMAN	K.ITQVLHFTK.D	Y	64.34	1085.62	1.4	543.82	2	34.79	7340	4	1647	1655
P0C0L5|CO4B_HUMAN	R.GLQDEDGYR.M	Y	62.07	1051.46	-0.3	526.736	2	22.56	3706	2	1605	1613
P0C0L5|CO4B_HUMAN	R.EM(+15.99)SGSPASGIPVK.V	Y	61.44	1274.62	1	638.317	2	27.08	5071	2	392	404	Oxidation (M)
P0C0L5|CO4B_HUMAN	R.GSSTWLTAFVLK.V	Y	61.28	1308.71	-0.7	655.361	2	67.85	16767	1	1073	1084
P0C0L5|CO4B_HUMAN	R.GSFEFPVGDAVSK.V	Y	60.5	1338.65	0.3	670.33	2	48.93	11456	2	917	929
P0C0L5|CO4B_HUMAN	K.DHAVDLIQK.G	Y	60.47	1037.55	2.7	519.784	2	26.79	4984	1	1043	1051
P0C0L5|CO4B_HUMAN	R.VEYGFQVK.V	Y	57.49	968.497	1.4	485.256	2	35.92	7672	2	1623	1630
P0C0L5|CO4B_HUMAN	K.VVEEQESR.V	Y	56.6	974.467	0.2	488.241	2	13.34	998	1	1458	1465
P0C0L5|CO4B_HUMAN	R.FGLLDEDGKK.T	Y	56.2	1120.58	0.7	374.533	3	35.52	7554	2	284	293
P0C0L5|CO4B_HUMAN	K.LNM(+15.99)GITDLQGLR.L	Y	50.92	1345.7	0.4	673.859	2	43.94	10015	1	326	337	Oxidation (M)
P0C0L5|CO4B_HUMAN	K.KYVLPNFEVK.I	Y	43.45	1235.69	1.1	618.854	2	44.96	10312	1	235	244
P0C0L5|CO4B_HUMAN	K.VGLSGM(+15.99)AIADVTLLSGFHALR.A	Y	37.91	2143.15	2.2	715.391	3	68.52	16955	3	1478	1498	Oxidation (M)
P0C0L5|CO4B_HUMAN	K.YVLPNFEVK.I	Y	36.98	1107.6	1.5	554.806	2	50.95	12027	2	236	244
P0C0L5|CO4B_HUMAN	K.GLC(+57.02)VATPVQLR.V	Y	36.77	1212.66	1.5	607.341	2	44.4	10145	1	818	828	Carbamidomethylation
P0C0L5|CO4B_HUMAN	K.LTSLSDR.Y	Y	36.61	790.418	1.1	396.217	2	19.97	2934	1	1504	1510
P0C0L5|CO4B_HUMAN	K.ITPGKPYILTVPGHLDEM(+15.99)QLDIQAR.Y	Y	29.1	2820.48	1.8	706.13	4	52.61	12495	1	245	269	Oxidation (M)
P0C0L5|CO4B_HUMAN	R.AAC(+57.02)AQLNDFLQEYGTQGC(+57.02)QV	Y	28.34	2271.99	1.5	758.338	3	60.52	14724	1	1725	1744	Carbamidomethylation
P00751|CFAB_HUMAN	K.VSEADSSNADWVTK.Q	Y	85.86	1507.68	1.1	754.848	2	30.93	6208	2	324	337
P00751|CFAB_HUMAN	R.YGLVTYATYPK.I	Y	79.94	1274.65	0.5	638.335	2	43.33	9836	2	309	319
P00751|CFAB_HUMAN	K.EAGIPEFYDYDVALIK.L	Y	78.68	1841.91	0.7	921.962	2	64.75	15902	2	566	581
P00751|CFAB_HUMAN	R.FIQVGVISWGVVDVC(+57.02)K.N	Y	74.71	1804.95	2.7	903.487	2	67.74	16739	2	711	726	Carbamidomethylation
P00751|CFAB_HUMAN	K.KEAGIPEFYDYDVALIK.L	Y	72.38	1970	1.3	657.676	3	59.06	14310	2	565	581
P00751|CFAB_HUMAN	K.YGQTIRPIC(+57.02)LPC(+57.02)TEGTTR.A	Y	68.63	2122.03	1.8	708.352	3	41.92	9418	2	588	605	Carbamidomethylation
P00751|CFAB_HUMAN	K.EKLQDEDLGFL	Y	67.01	1305.65	0.7	653.83	2	55.04	13175	2	754	764
P00751|CFAB_HUMAN	R.DAQYAPGYDK.V	Y	63	1126.49	0.4	564.254	2	22.42	3663	2	659	668
P00751|CFAB_HUMAN	K.DISEVVTPR.F	Y	61.23	1014.53	0	508.274	2	33.86	7072	1	671	679
P00751|CFAB_HUMAN	K.ALFVSEEEK.K	Y	60.72	1050.52	0	526.269	2	33.7	7023	2	630	638
P00751|CFAB_HUMAN	K.VASYGVKPR.Y	Y	57.55	975.55	1.9	488.783	2	17.17	2108	1	300	308
P00751|CFAB_HUMAN	K.LQDEDLGFL	Y	56.22	1048.51	1.4	525.262	2	61.46	14983	2	756	764
P00751|CFAB_HUMAN	K.C(+57.02)LVNLIEK.V	Y	53.98	987.542	2	494.779	2	45.42	10442	2	292	299	Carbamidomethylation
P00751|CFAB_HUMAN	K.QLNEINYEDHK.L	Y	53.38	1401.65	1.3	701.834	2	25.54	4608	3	338	348
P00751|CFAB_HUMAN	K.DNEQHVFK.V	Y	51	1015.47	1.2	508.744	2	18.32	2448	1	447	454
P00751|CFAB_HUMAN	R.FLC(+57.02)TGGVSPYADPNTC(+57.02)RGDSGGPLIVHK.R	Y	48.39	2974.41	-0.3	744.609	4	43.36	9845	2	680	707	Carbamidomethylation
P00751|CFAB_HUMAN	K.ALFVSEEEKK.L	Y	48.14	1178.62	1.1	590.317	2	27.61	5227	2	630	639
P00751|CFAB_HUMAN	K.ISVIRPSK.G	Y	46.04	898.56	1.3	450.288	2	21.94	3517	1	499	506
P00751|CFAB_HUMAN	K.GSC(+57.02)ERDAQYAPGYDK.V	Y	43.14	1715.72	0.2	572.914	3	20.96	3225	2	654	668	Carbamidomethylation
P00751|CFAB_HUMAN	R.LPPTTTC(+57.02)QQQKEELLPAQDIK.A	Y	35.83	2437.25	0.9	813.425	3	39.05	8590	1	609	629	Carbamidomethylation
P29622|KAIN_HUMAN	K.ATLDVDEAGTEAAAATSFAIK.F	Y	97.36	2051.01	1.4	1026.51	2	55.56	13324	4	366	386
P29622|KAIN_HUMAN	R.FYYLIASETPGK.N	Y	77.59	1387.7	0.8	694.859	2	49.61	11646	2	62	73
P29622|KAIN_HUMAN	K.GDATVFFILPNQGK.M	Y	75.89	1505.79	0.7	753.902	2	60.55	14730	2	272	285
P29622|KAIN_HUMAN	R.VGSALFLSHNLK.F	Y	69.61	1284.72	0.8	643.367	2	41.27	9230	4	139	150
P29622|KAIN_HUMAN	R.LGFTDLFSK.W	Y	68.83	1026.54	0.8	514.277	2	60.54	14726	2	336	344
P29622|KAIN_HUMAN	K.IAPANADFAFR.F	Y	66.14	1191.6	0.8	596.81	2	43.85	9987	2	51	61
P29622|KAIN_HUMAN	R.MDYKGDATVFFILPNQGK.M	Y	64.67	2043.01	1.7	682.013	3	59.5	14436	2	268	285
P29622|KAIN_HUMAN	K.FSISGSYVLDQILPR.L	Y	63.99	1693.9	1.8	847.961	2	69.54	17237	4	321	335
P29622|KAIN_HUMAN	K.FFSAQTNR.H	Y	61.72	969.467	0.9	485.741	2	25.69	4651	2	387	394
P29622|KAIN_HUMAN	K.WADLSGITK.Q	Y	58.45	989.518	0.4	495.767	2	42.47	9583	3	345	353
P29622|KAIN_HUMAN	K.LFHTNFYDTVGTIQLINDHVK.K	Y	57.94	2474.26	2.2	825.762	3	58.79	14236	1	167	187
P29622|KAIN_HUMAN	R.M(+15.99)DYKGDATVFFILPNQGK.M	Y	57	2059.01	1.9	687.345	3	57.48	13866	2	268	285	Oxidation (M)
P29622|KAIN_HUMAN	R.EIEEVLTPEM(+15.99)LM(+15.99)R.W	Y	47.96	1620.77	1.2	811.395	2	46.19	10669	1	288	300	Oxidation (M)
P29622|KAIN_HUMAN	R.YLPC(+57.02)SVLR.M	Y	43.56	1006.53	1.2	504.271	2	39.04	8584	2	260	267	Carbamidomethylation
P29622|KAIN_HUMAN	R.WNNLLR.K	Y	36.81	814.445	0.8	408.23	2	37.93	8263	2	301	306
P29622|KAIN_HUMAN	K.LFHTNFYDTVGTIQLINDHVKK.E	Y	34.37	2602.35	2	521.479	5	55.2	13221	1	167	188
P29622|KAIN_HUMAN	K.IVDLVSELKK.D	Y	34.28	1142.69	2.7	381.905	3	43.78	9964	1	194	203
P29622|KAIN_HUMAN	K.M(+15.99)REIEEVLTPEMLM(+15.99)R.W	Y	29.2	1907.92	0.7	636.98	3	49.42	11595	1	286	300	Oxidation (M)
P01877|IGHA2_HUMAN	R.QEPSQGTTTFAVTSILR.V	N	90.55	1834.94	1.6	918.48	2	55.48	13298	6	270	286
P01877|IGHA2_HUMAN	K.GDTFSC(+57.02)MVGHEALPLAFTQK.T	N	86.34	2208.03	1.3	1105.03	2	58.01	14016	4	295	314	Carbamidomethylation
P01877|IGHA2_HUMAN	K.GDTFSC(+57.02)M(+15.99)VGHEALPLAFTQK.T	N	81.3	2224.03	1.1	1113.02	2	52.06	12338	13	295	314	Carbamidomethylation; Oxidation (M)
P01877|IGHA2_HUMAN	R.DASGATFTWTPSSGK.S	Y	80.73	1511.69	0.5	756.852	2	42.48	9584	2	141	155
P01877|IGHA2_HUMAN	K.YLTWASRQEPSQGTTTFAVTSILR.V	N	76.44	2712.39	-0.6	905.136	3	59.86	14538	2	263	286
P01877|IGHA2_HUMAN	K.KGDTFSC(+57.02)MVGHEALPLAFTQK.T	N	72.39	2336.13	2.4	779.719	3	53.55	12755	4	294	314	Carbamidomethylation
P01877|IGHA2_HUMAN	R.WLQGSQELPREK.Y	N	71.14	1469.76	1.8	735.89	2	32.19	6585	4	251	262
P01877|IGHA2_HUMAN	K.KGDTFSC(+57.02)M(+15.99)VGHEALPLAFTQK.T	N	69.36	2352.12	0.9	785.049	3	47.82	11144	12	294	314	Carbamidomethylation; Oxidation (M)
P01877|IGHA2_HUMAN	R.NFPPSQDASGDLYTTSSQLTLPATQC(+57.02)PDGK.S	Y	66.82	3195.47	1	1066.16	3	52.81	12551	7	52	81	Carbamidomethylation
P01877|IGHA2_HUMAN	K.SAVQGPPER.D	N	66.12	939.477	0.8	470.746	2	16.38	1875	2	156	164
P01877|IGHA2_HUMAN	R.WLQGSQELPR.E	N	64.88	1212.63	1.5	607.321	2	38.08	8306	2	251	260
P01877|IGHA2_HUMAN	K.SGNTFRPEVHLLPPPSEELALNELVTLTC(+57.02)LAR.G	N	64.56	3572.87	1.6	1191.96	3	77.67	19298	9	209	240	Carbamidomethylation
P01877|IGHA2_HUMAN	K.YLTWASR.Q	N	59.3	895.455	1	448.735	2	37.28	8069	2	263	269
P01877|IGHA2_HUMAN	R.VAAEDWK.K	N	55.64	817.397	0.9	409.706	2	23.66	4038	2	287	293
P01877|IGHA2_HUMAN	R.VAAEDWKK.G	N	53.44	945.492	1.7	473.754	2	18.37	2465	2	287	294
P01877|IGHA2_HUMAN	K.HYTNPSQDVTVPC(+57.02)PVPPPPPC(+57.02)C(+57.02)HPR.L	Y	43.81	2908.32	1.5	728.089	4	37.79	8226	2	89	113	Carbamidomethylation
P01861|IGHG4_HUMAN	R.VVSVLTVLHQDWLNGK.E	N	85.86	1807	1.9	904.509	2	65.74	16177	4	182	197
P01861|IGHG4_HUMAN	K.GFYPSDIAVEWESNGQPENNYK.T	N	82.88	2543.12	1	1272.57	2	58	14014	2	251	272
P01861|IGHG4_HUMAN	R.STSESTAALGC(+57.02)LVK.D	N	79.22	1422.7	1.4	712.359	2	41.48	9288	6	17	30	Carbamidomethylation
P01861|IGHG4_HUMAN	K.TTPPVLDSDGSFFLYSR.L	Y	76.63	1900.92	2	951.47	2	60.42	14695	4	273	289
P01861|IGHG4_HUMAN	K.YGPPC(+57.02)PSC(+57.02)PAPEFLGGPSVFLFPPKPK.D	Y	75.83	2942.45	2.6	981.826	3	66.86	16489	7	102	128	Carbamidomethylation
P01861|IGHG4_HUMAN	K.TYTC(+57.02)NVDHKPSNTK.V	Y	73.65	1663.76	0.8	832.889	2	14.3	1270	6	80	93	Carbamidomethylation
P01861|IGHG4_HUMAN	K.GPSVFPLAPC(+57.02)SR.S	N	71.3	1286.64	0.6	644.33	2	46.94	10883	2	5	16	Carbamidomethylation
P01861|IGHG4_HUMAN	K.NQVSLTC(+57.02)LVK.G	N	66.95	1160.62	1.1	581.319	2	43.62	9917	2	241	250	Carbamidomethylation
P01861|IGHG4_HUMAN	R.EPQVYTLPPSQEEM(+15.99)TK.N	Y	60.2	1891.89	3.2	946.954	2	35.82	7643	11	225	240	Oxidation (M)
P01861|IGHG4_HUMAN	K.GQPREPQVYTLPPSQEEM(+15.99)TK.N	Y	57.62	2330.12	1.1	777.715	3	34.87	7363	8	221	240	Oxidation (M)
P01861|IGHG4_HUMAN	K.TYTC(+57.02)NVDHKPSNTKVDK.R	Y	57.24	2005.95	0.8	669.659	3	15.23	1546	5	80	96	Carbamidomethylation
P01861|IGHG4_HUMAN	K.DTLMISR.T	N	53.48	834.427	1.5	418.221	2	31.32	6326	2	129	135
P01861|IGHG4_HUMAN	K.SRWQEGNVFSC(+57.02)SVMHEALHNHYTQK.S	Y	50.49	3044.38	0.5	762.102	4	44.29	10113	2	295	319	Carbamidomethylation
P01861|IGHG4_HUMAN	K.DTLM(+15.99)ISR.T	N	47.59	850.422	1.5	426.219	2	28.58	5509	9	129	135	Oxidation (M)
P01861|IGHG4_HUMAN	K.GLPSSIEK.T	Y	39.14	829.455	1.3	415.735	2	26.38	4857	2	207	214
P01861|IGHG4_HUMAN	K.NQVSLTCLVK.G	N	38.64	1103.6	2.4	552.809	2	52.46	12453	1	241	250
P05543|THBG_HUMAN	K.FSISATYDLGATLLK.M	Y	81.65	1598.86	1.1	800.436	2	66.48	16386	2	308	322
P05543|THBG_HUMAN	K.EGQMESVEAAMSSK.T	Y	76.16	1482.63	1.6	742.325	2	38.35	8387	2	274	287
P05543|THBG_HUMAN	K.MGIQHAYSENADFSGLTEDNGLK.L	Y	74.11	2496.12	2.3	833.05	3	46.18	10666	2	323	345
P05543|THBG_HUMAN	K.ELELQIGNALFIGK.H	Y	73.82	1543.86	2	772.939	2	65.59	16138	1	125	138
P05543|THBG_HUMAN	K.TEDSSSFLIDK.T	Y	73.45	1240.58	0.8	621.299	2	38.22	8348	2	219	229
P05543|THBG_HUMAN	K.M(+15.99)GIQHAYSENADFSGLTEDNGLK.L	Y	72.34	2512.12	1.7	838.381	3	43.55	9899	2	323	345	Oxidation (M)
P05543|THBG_HUMAN	K.EGQMESVEAAM(+15.99)SSK.T	Y	71.64	1498.63	1	750.322	2	23.82	4090	2	274	287	Oxidation (M)
P05543|THBG_HUMAN	K.EGQM(+15.99)ESVEAAMSSK.T	Y	68.85	1498.63	1.7	750.322	2	28.61	5519	2	274	287	Oxidation (M)
P05543|THBG_HUMAN	R.SFM(+15.99)LLILER.S	Y	68.65	1136.63	1.7	569.321	2	62.13	15167	2	390	398	Oxidation (M)
P05543|THBG_HUMAN	K.NALALFVLPK.E	Y	67.22	1084.66	0.4	543.34	2	63.59	15579	2	264	273
P05543|THBG_HUMAN	K.KELELQIGNALFIGK.H	Y	67.11	1671.96	0.6	558.326	3	58.18	14065	2	124	138
P05543|THBG_HUMAN	R.SFMLLILER.S	Y	65.47	1120.63	0.8	561.323	2	68.95	17073	2	390	398
P05543|THBG_HUMAN	K.QEINSHVEMQTK.G	Y	63.51	1442.68	1.8	722.35	2	22.11	3569	2	171	182
P05543|THBG_HUMAN	K.M(+15.99)SSINADFAFNLYR.R	Y	62.3	1663.77	3.1	832.893	2	58.55	14170	1	42	55	Oxidation (M)
P05543|THBG_HUMAN	K.GTEAAAVPEVELSDQPENTFLHPIIQIDR.S	Y	59.02	3188.6	1.8	1063.88	3	64.08	15714	2	361	389
P05543|THBG_HUMAN	K.EGQM(+15.99)ESVEAAM(+15.99)SSK.T	Y	58.5	1514.62	0.3	758.319	2	16.95	2045	1	274	287	Oxidation (M)
P05543|THBG_HUMAN	K.AQWANPFDPSK.T	Y	58.11	1259.59	0.9	630.805	2	48.7	11387	1	208	218
P05543|THBG_HUMAN	K.AQWANPFDPSKTEDSSSFLIDK.T	Y	55.13	2482.16	2.6	828.398	3	58.3	14098	2	208	229
P05543|THBG_HUMAN	K.AVLHIGEK.G	Y	55.02	865.502	0.5	433.759	2	24.7	4355	1	353	360
P05543|THBG_HUMAN	R.FTVETPDK.N	Y	53.05	935.46	1.3	468.738	2	28.33	5437	2	57	64
P05543|THBG_HUMAN	K.GWVDLFVPK.F	Y	43.81	1059.58	0.7	530.795	2	64.98	15965	2	299	307
P05543|THBG_HUMAN	R.RFTVETPDK.N	Y	42.53	1091.56	0.6	546.788	2	24.87	4409	2	56	64
P05543|THBG_HUMAN	K.QEINSHVEM(+15.99)QTK.G	Y	39.36	1458.68	0.4	730.346	2	16.26	1842	4	171	182	Oxidation (M)
P19013|K2C4_HUMAN	K.WNLLQQQTTTTSSK.N	Y	85.56	1634.83	1.7	818.422	2	43.37	9851	2	183	196
P19013|K2C4_HUMAN	R.NLDLDSIIAEVR.A	N	77.77	1356.72	2	679.371	2	66.4	16363	2	315	326
P19013|K2C4_HUMAN	R.GAFSSVSM(+15.99)SGGAGR.C	Y	77.41	1285.57	0.5	643.794	2	24.56	4316	2	28	41	Oxidation (M)
P19013|K2C4_HUMAN	K.LALDIEIATYR.K	N	76.2	1276.7	1.7	639.36	2	57.26	13802	3	444	454
P19013|K2C4_HUMAN	K.AEAEALYQTK.V	N	67.62	1122.56	1.4	562.286	2	25.58	4620	2	338	347
P19013|K2C4_HUMAN	R.AQYEEIAQR.S	N	66.45	1106.54	1.5	554.276	2	24.15	4187	3	327	335
P19013|K2C4_HUMAN	K.NLEPLFETYLSVLR.K	Y	62.77	1692.91	2.1	847.463	2	78.58	19502	3	197	210
P19013|K2C4_HUMAN	K.FASFIDK.V	N	56.09	826.423	1.3	414.219	2	38.21	8344	2	162	168
P19013|K2C4_HUMAN	K.VQQLQISVDQHGDNLK.N	Y	54.73	1820.94	1.3	607.987	3	36.28	7780	2	348	363
P19013|K2C4_HUMAN	R.TAAENDFVVLKK.D	Y	54.54	1333.72	1.2	667.87	2	35.1	7428	1	249	260
P19013|K2C4_HUMAN	K.SEIAELNR.M	Y	53.87	930.477	2.8	466.247	2	26.81	4992	1	367	374
P19013|K2C4_HUMAN	K.SISM(+15.99)SVAGSR.Q	Y	52.64	1009.49	0.1	505.75	2	18.65	2550	1	60	69	Oxidation (M)
P19013|K2C4_HUMAN	K.LLEGEEYR.M	N	49.46	1007.49	0.4	504.754	2	27.6	5225	1	456	463
P19013|K2C4_HUMAN	K.IISTTTLNK.R	Y	48.97	989.576	1.5	495.796	2	26.4	4866	2	524	532
P19013|K2C4_HUMAN	R.SKAEAEALYQTK.V	N	35.17	1337.68	1.4	669.85	2	22.95	3825	1	336	347
P19013|K2C4_HUMAN	R.LRAEIENIK.K	Y	28.23	1084.62	-0.3	362.548	3	28.18	5391	1	379	387
P02765|FETUA_HUMAN	R.HTFMGVVSLGSPSGEVSHPR.K	Y	88.02	2080.02	1	694.347	3	42.82	9686	6	318	337
P02765|FETUA_HUMAN	K.EHAVEGDC(+57.02)DFQLLK.L	Y	86.97	1659.76	1.6	830.887	2	42.34	9541	4	107	120	Carbamidomethylation
P02765|FETUA_HUMAN	R.AQLVPLPPSTYVEFTVSGTDC(+57.02)VAK.E	Y	86.94	2578.3	1.5	1290.16	2	63.93	15672	8	188	211	Carbamidomethylation
P02765|FETUA_HUMAN	R.HTFM(+15.99)GVVSLGSPSGEVSHPR.K	Y	82.91	2096.01	1.5	699.679	3	36.42	7820	16	318	337	Oxidation (M)
P02765|FETUA_HUMAN	K.HTLNQIDEVK.V	Y	66.42	1195.62	0.7	598.817	2	24.48	4289	8	58	67
P02765|FETUA_HUMAN	K.C(+57.02)DSSPDSAEDVR.K	Y	64.67	1336.52	1.4	669.268	2	17.91	2330	2	132	143	Carbamidomethylation
P02765|FETUA_HUMAN	R.QPNC(+57.02)DDPETEEAALVAIDYINQNLPWGYK.H	Y	63.22	3362.54	-1.5	1121.85	3	81.92	20072	5	29	57	Carbamidomethylation
P02765|FETUA_HUMAN	K.FSVVYAK.C	Y	62.35	812.443	1.2	407.229	2	33.12	6851	2	125	131
P02765|FETUA_HUMAN	K.LDGKFSVVYAK.C	Y	62.08	1225.67	0.9	409.565	3	35.65	7593	2	121	131
P02765|FETUA_HUMAN	R.AHYDLRHTFM(+15.99)GVVSLGSPSGEVSHPR.K	Y	56.89	2851.38	2.1	713.854	4	45.87	10574	4	312	337	Oxidation (M)
P02765|FETUA_HUMAN	K.C(+57.02)DSSPDSAEDVRK.V	Y	50.27	1464.62	1	489.213	3	15.16	1525	2	132	144	Carbamidomethylation
P02765|FETUA_HUMAN	K.C(+57.02)NLLAEK.Q	Y	49.3	846.427	1.4	424.221	2	26.65	4940	2	219	225	Carbamidomethylation
P02765|FETUA_HUMAN	R.AHYDLR.H	Y	45.49	773.382	1.8	387.699	2	17.51	2211	2	312	317
P02765|FETUA_HUMAN	K.QYGFC(+57.02)K.A	Y	39.03	801.348	0.5	401.682	2	24.21	4205	2	226	231	Carbamidomethylation
P01019|ANGT_HUMAN	K.QPFVQGLALYTPVVLPR.S	Y	85.17	1897.08	1.2	949.55	2	67.62	16703	6	221	237
P01019|ANGT_HUMAN	K.VLSALQAVQGLLVAQGR.A	Y	84.91	1722.02	2.5	862.017	2	72.06	17927	5	180	196
P01019|ANGT_HUMAN	R.SLDFTELDVAAEK.I	Y	82.19	1436.7	1.6	719.36	2	53.08	12627	3	238	250
P01019|ANGT_HUMAN	K.VEGLTFQQNSLNWMK.K	Y	80.63	1793.88	1.8	897.947	2	58.32	14105	2	356	370
P01019|ANGT_HUMAN	K.VEGLTFQQNSLNWM(+15.99)K.K	Y	78.04	1809.87	1.3	905.944	2	51.15	12081	3	356	370	Oxidation (M)
P01019|ANGT_HUMAN	K.ALQDQLVLVAAK.L	Y	74.75	1267.75	0.9	634.883	2	48.11	11225	2	83	94
P01019|ANGT_HUMAN	K.DPTFIPAPIQAK.T	Y	73.22	1296.71	0.6	649.362	2	47.95	11177	2	64	75
P01019|ANGT_HUMAN	K.IDRFMQAVTGWK.T	Y	64.05	1450.74	1.6	484.588	3	49.96	11744	4	251	262
P01019|ANGT_HUMAN	K.ANAGKPKDPTFIPAPIQAK.T	Y	63.04	1963.09	1.8	655.371	3	37.28	8073	4	57	75
P01019|ANGT_HUMAN	R.FM(+15.99)QAVTGWK.T	Y	61.31	1082.52	1	542.269	2	34.42	7234	2	254	262	Oxidation (M)
P01019|ANGT_HUMAN	K.ALQDQLVLVAAKLDTEDK.L	Y	56.3	1969.07	1.4	657.366	3	59.41	14411	2	83	100
P01019|ANGT_HUMAN	K.IDRFM(+15.99)QAVTGWK.T	Y	56.08	1466.73	1.5	734.375	2	40.2	8920	3	251	262	Oxidation (M)
P01019|ANGT_HUMAN	R.LQAILGVPWK.D	Y	53.75	1123.68	1.9	562.846	2	58.09	14040	2	158	167
P01019|ANGT_HUMAN	R.ADSQAQLLLSTVVGVFTAPGLHLK.Q	Y	42.85	2464.37	-1.4	822.462	3	86.4	20660	6	197	220
P01859|IGHG2_HUMAN	K.TTPPMLDSDGSFFLYSK.L	Y	81.51	1904.89	1.5	635.97	3	61.31	14940	4	272	288
P01859|IGHG2_HUMAN	R.STSESTAALGC(+57.02)LVK.D	N	79.22	1422.7	1.4	712.359	2	41.48	9288	6	17	30	Carbamidomethylation
P01859|IGHG2_HUMAN	K.TTPPM(+15.99)LDSDGSFFLYSK.L	Y	78.18	1920.88	0.9	641.302	3	55.93	13425	18	272	288	Oxidation (M)
P01859|IGHG2_HUMAN	K.C(+57.02)C(+57.02)VEC(+57.02)PPC(+57.02)PAPPVAGPSVFLFPPKPK.D	Y	77.6	2907.39	2	970.141	3	58.23	14077	4	102	127	Carbamidomethylation
P01859|IGHG2_HUMAN	K.GPSVFPLAPC(+57.02)SR.S	N	71.3	1286.64	0.6	644.33	2	46.94	10883	2	5	16	Carbamidomethylation
P01859|IGHG2_HUMAN	K.NQVSLTC(+57.02)LVK.G	N	66.95	1160.62	1.1	581.319	2	43.62	9917	2	240	249	Carbamidomethylation
P01859|IGHG2_HUMAN	K.GQPREPQVYTLPPSREEMTK.N	N	64.61	2342.17	1.1	781.731	3	34.28	7196	17	220	239
P01859|IGHG2_HUMAN	R.EPQVYTLPPSR.E	N	60.76	1285.67	1.7	643.842	2	35.32	7493	4	224	234
P01859|IGHG2_HUMAN	R.EPQVYTLPPSREEM(+15.99)TK.N	N	60.7	1919.93	1.4	960.973	2	30.8	6172	15	224	239	Oxidation (M)
P01859|IGHG2_HUMAN	K.SRWQQGNVFSC(+57.02)SVMHEALHNHYTQK.S	N	58.38	3043.39	1	761.856	4	42.85	9695	4	294	318	Carbamidomethylation
P01859|IGHG2_HUMAN	K.GQPREPQVYTLPPSREEM(+15.99)TK.N	N	57.82	2358.16	1.2	787.063	3	29.36	5751	20	220	239	Oxidation (M)
P01859|IGHG2_HUMAN	K.GFYPSDISVEWESNGQPENNYK.T	Y	56.3	2559.12	2.5	854.049	3	55.06	13182	6	250	271
P01859|IGHG2_HUMAN	R.EPQVYTLPPSREEMTK.N	N	55.31	1903.93	2.4	952.977	2	35.12	7436	13	224	239
P01859|IGHG2_HUMAN	K.DTLMISR.T	N	53.48	834.427	1.5	418.221	2	31.32	6326	2	128	134
P01859|IGHG2_HUMAN	K.GQPREPQVYTLPPSR.E	N	52.41	1723.9	1	575.641	3	32.56	6691	4	220	234
P01859|IGHG2_HUMAN	K.DTLM(+15.99)ISR.T	N	47.59	850.422	1.5	426.219	2	28.58	5509	9	128	134	Oxidation (M)
P01859|IGHG2_HUMAN	R.KCCVEC(+57.02)PPC(+57.02)PAPPVAGPSVFLFPPKPK.D	Y	47.04	2921.45	-9.1	974.814	3	58.31	14101	2	101	127	Carbamidomethylation
P01859|IGHG2_HUMAN	K.SRWQQGNVFSC(+57.02)SVM(+15.99)HEALHNHYTQK.S	N	46.93	3059.39	1.9	765.856	4	35.64	7587	6	294	318	Carbamidomethylation; Oxidation (M)
P01859|IGHG2_HUMAN	K.GLPAPIEK.T	Y	45.22	823.48	1.9	412.748	2	29.9	5906	2	206	213
P01859|IGHG2_HUMAN	R.KC(+57.02)C(+57.02)VEC(+57.02)PPC(+57.02)PAPPVAGPSVFLFPPKPK.D	Y	42.77	3035.49	1.2	759.88	4	54.23	12948	2	101	127	Carbamidomethylation
P01859|IGHG2_HUMAN	R.WQQGNVFSC(+57.02)SVMHEALHNHYTQK.S	N	39.94	2800.26	0.7	934.428	3	45.23	10387	5	296	318	Carbamidomethylation
P01859|IGHG2_HUMAN	K.NQVSLTCLVK.G	N	38.64	1103.6	2.4	552.809	2	52.46	12453	1	240	249
P01859|IGHG2_HUMAN	R.WQQGNVFSC(+57.02)SVM(+15.99)HEALHNHYTQK.S	N	36.92	2816.25	0.7	939.76	3	37.53	8149	6	296	318	Carbamidomethylation; Oxidation (M)
P01859|IGHG2_HUMAN	K.C(+57.02)C(+57.02)VEC(+156.12)PPCPAPPVAGPSVFLFPPKPK.D	Y	36.82	2949.47	-6	984.157	3	58.79	14237	1	102	127	Carbamidomethylation; SL-HNE (C)
P19823|ITIH2_HUMAN	K.VVNNSPQPQNVVFDVQIPK.G	Y	89.41	2121.12	2.2	1061.57	2	54.77	13098	4	94	112
P19823|ITIH2_HUMAN	K.FYNQVSTPLLR.N	Y	73.74	1336.71	2.3	669.366	2	46.45	10745	2	489	499
P19823|ITIH2_HUMAN	K.IQPSGGTNINEALLR.A	Y	72.15	1581.85	1	791.932	2	42.15	9485	2	380	394
P19823|ITIH2_HUMAN	R.IYGNQDTSSQLK.K	Y	71.18	1352.66	0.9	677.337	2	23.38	3954	2	476	487
P19823|ITIH2_HUMAN	R.FLHVPDTFEGHFDGVPVISK.G	Y	67.54	2240.13	1.3	747.717	3	56.46	13577	4	223	242
P19823|ITIH2_HUMAN	R.TEVNVLPGAK.V	Y	65.12	1026.57	1.9	514.294	2	32.19	6584	2	167	176
P19823|ITIH2_HUMAN	K.AHVSFKPTVAQQR.I	Y	61.81	1467.79	1.8	490.273	3	23.38	3955	3	247	259
P19823|ITIH2_HUMAN	R.SSALDM(+15.99)ENFRTEVNVLPGAK.V	Y	56.99	2193.07	1.8	732.033	3	46.69	10818	2	157	176	Oxidation (M)
P19823|ITIH2_HUMAN	R.IYGNQDTSSQLKK.F	Y	56.08	1480.75	1.1	741.384	2	19.17	2707	3	476	488
P19823|ITIH2_HUMAN	R.TWRNDLISATK.T	Y	52.86	1303.69	0.4	435.57	3	36.39	7813	1	357	367
P19823|ITIH2_HUMAN	R.IYLQPGR.L	Y	52.76	845.476	1.1	423.746	2	27.44	5174	2	198	204
P19823|ITIH2_HUMAN	K.TILDDLRAEDHFSVIDFNQNIR.T	Y	45.28	2630.31	1.4	877.778	3	65.61	16144	3	335	356
P19823|ITIH2_HUMAN	K.VQFELHYQEVK.W	Y	41.8	1418.72	1.3	473.914	3	40.1	8890	1	177	187
P19823|ITIH2_HUMAN	K.RLSNENHGIAQR.I	Y	41.45	1393.72	0.3	465.58	3	14.44	1310	1	464	475
P19823|ITIH2_HUMAN	R.LSNENHGIAQR.I	Y	34.01	1237.62	-0.3	413.546	3	15.23	1545	2	465	475
P02647|APOA1_HUMAN	K.LLDNWDSVTSTFSK.L	Y	83.8	1611.78	1.2	806.897	2	57.04	13740	2	70	83
P02647|APOA1_HUMAN	K.LREQLGPVTQEFWDNLEK.E	Y	82.47	2201.11	2	734.713	3	60.47	14707	1	84	101
P02647|APOA1_HUMAN	K.VSFLSALEEYTK.K	Y	78.65	1385.71	0.5	693.861	2	67.76	16741	2	251	262
P02647|APOA1_HUMAN	K.DSGRDYVSQFEGSALGK.Q	Y	75.44	1814.84	1.4	908.43	2	45.39	10435	4	48	64
P02647|APOA1_HUMAN	K.DLATVYVDVLK.D	Y	69.5	1234.68	0.8	618.348	2	59.94	14560	2	37	47
P02647|APOA1_HUMAN	K.ATEHLSTLSEK.A	Y	68.74	1214.61	1.2	608.315	2	21.17	3286	4	220	230
P02647|APOA1_HUMAN	K.KWQEEM(+15.99)ELYR.Q	Y	62.88	1426.65	0.6	476.559	3	30.92	6206	3	131	140	Oxidation (M)
P02647|APOA1_HUMAN	R.QGLLPVLESFK.V	Y	62.27	1229.7	1.4	615.859	2	64.91	15944	2	240	250
P02647|APOA1_HUMAN	R.THLAPYSDELR.Q	Y	52.43	1300.64	2	651.329	2	31.02	6237	1	185	195
P02647|APOA1_HUMAN	R.THLAPYSDELRQR.L	Y	46.24	1584.8	1.8	529.275	3	27.79	5280	2	185	197
P02647|APOA1_HUMAN	K.AKPALEDLR.Q	Y	40.79	1011.57	2.4	506.794	2	27.38	5160	1	231	239
P02647|APOA1_HUMAN	K.ETEGLRQEM(+15.99)SK.D	Y	40.32	1322.61	0.9	662.315	2	14.39	1297	2	102	112	Oxidation (M)
P02647|APOA1_HUMAN	K.ETEGLRQEMSK.D	Y	37.4	1306.62	1.5	654.318	2	20.63	3127	1	102	112
P02647|APOA1_HUMAN	R.QKVEPLRAELQEGAR.Q	Y	28.9	1722.94	1.1	575.32	3	28.88	5602	4	141	155
P08185|CBG_HUMAN	R.WSAGLTSSQVDLYIPK.V	Y	92.39	1763.91	0.7	882.963	2	56.97	13721	4	288	303
P08185|CBG_HUMAN	R.GLASANVDFAFSLYK.H	Y	80.72	1601.81	1.1	801.913	2	62.2	15189	2	38	52
P08185|CBG_HUMAN	R.EENFYVDETTVVK.V	Y	73.64	1571.74	0.9	786.876	2	42.8	9682	2	218	230
P08185|CBG_HUMAN	K.GTWTQPFDLASTR.E	Y	67.56	1478.72	2	740.366	2	53.04	12617	2	205	217
P08185|CBG_HUMAN	K.M(+15.99)NTVIAALSR.D	Y	60.1	1090.58	1.1	546.298	2	39.67	8764	2	273	282	Oxidation (M)
P08185|CBG_HUMAN	R.SETEIHQGFQHLHQLFAK.S	Y	59.49	2149.07	1.1	717.365	3	46.38	10723	3	101	118
P08185|CBG_HUMAN	K.MNTVIAALSR.D	Y	58.93	1074.59	2	538.301	2	45.71	10526	2	273	282
P08185|CBG_HUMAN	R.ITQDAQLK.S	Y	51.86	915.503	1	458.759	2	18.23	2421	2	334	341
P08185|CBG_HUMAN	K.HLVALSPK.K	Y	51.07	863.523	0.3	432.769	2	24.49	4292	2	53	60
P08185|CBG_HUMAN	K.HYYESEVLAM(+15.99)NFQDWATASR.Q	Y	48.53	2433.07	1.7	812.032	3	57.96	14003	1	149	168	Oxidation (M)
P08185|CBG_HUMAN	R.QINSYVK.N	Y	44.41	850.455	1.5	426.235	2	22.07	3556	2	169	175
P08185|CBG_HUMAN	K.HLVALSPKK.N	Y	43.37	991.618	0.5	496.816	2	18.97	2649	1	53	61
P08185|CBG_HUMAN	K.AVLQLNEEGVDTAGSTGVTLNLTSKPIILR.F	Y	37.14	3108.7	1.5	1037.24	3	60.9	14828	1	349	378
P02790|HEMO_HUMAN	K.LYLVQGTQVYVFLTK.G	Y	77.96	1770.99	1.4	886.505	2	66.56	16408	3	318	332
P02790|HEMO_HUMAN	K.EVGTPHGIILDSVDAAFIC(+57.02)PGSSR.L	Y	75.78	2497.23	1.9	833.418	3	60.77	14790	2	348	371	Carbamidomethylation
P02790|HEMO_HUMAN	R.YYC(+57.02)FQGNQFLR.F	Y	73.29	1494.67	0.9	748.344	2	49.44	11598	2	198	208	Carbamidomethylation
P02790|HEMO_HUMAN	K.SGAQATWTELPWPHEK.V	Y	72.66	1836.88	1.6	613.302	3	52.5	12462	2	387	402
P02790|HEMO_HUMAN	K.GGYTLVSGYPK.R	Y	64.1	1140.58	0.9	571.299	2	38.1	8316	2	333	343
P02790|HEMO_HUMAN	K.VDGALC(+57.02)M(+15.99)EK.S	Y	60.93	1037.45	0.2	519.734	2	18.58	2530	1	403	411	Carbamidomethylation; Oxidation (M)
P02790|HEMO_HUMAN	R.QGHNSVFLIK.G	Y	57.15	1141.62	1.8	381.549	3	35.81	7641	3	103	112
P02790|HEMO_HUMAN	K.NFPSPVDAAFR.Q	Y	54.19	1219.6	1.5	610.807	2	49.14	11515	2	92	102
P02790|HEMO_HUMAN	K.LLQDEFPGIPSPLDAAVEC(+57.02)HR.G	Y	50.92	2363.16	2	788.728	3	61.76	15067	2	131	151	Carbamidomethylation
P02790|HEMO_HUMAN	K.SLGPNSC(+57.02)SANGPGLYLIHGPNLYC(+57.02)YSDVEK.L	Y	40.94	3281.51	1.9	1094.85	3	57.96	14002	1	412	441	Carbamidomethylation
P02790|HEMO_HUMAN	K.VWVYPPEK.K	Y	40.63	1016.53	2.3	509.275	2	38.4	8402	1	116	123
P02790|HEMO_HUMAN	R.RLWWLDLK.S	Y	37.34	1128.64	0.8	565.33	2	60.62	14749	2	379	386
P02790|HEMO_HUMAN	K.WDRELISER.W	Y	35.08	1202.6	0.2	401.875	3	33.08	6843	1	81	89
P02790|HEMO_HUMAN	K.GEFVWK.S	Y	33.46	764.386	0.8	383.2	2	39.25	8645	2	72	77
P02790|HEMO_HUMAN	R.LWWLDLK.S	Y	32.76	972.543	1.7	487.28	2	68.29	16889	1	380	386
P02790|HEMO_HUMAN	R.LHIM(+15.99)AGR.R	Y	30.01	812.433	0.2	407.224	2	18.12	2391	1	372	378	Oxidation (M)
P04745|AMY1_HUMAN	K.TGSGDIENYNDATQVR.D	Y	85.95	1738.78	2.2	870.397	2	30.12	5970	2	158	173
P04745|AMY1_HUMAN	R.ALVFVDNHDNQR.G	Y	73.81	1426.7	1.8	714.356	2	31.97	6519	4	307	318
P04745|AMY1_HUMAN	R.LSGLLDLALGK.D	Y	71.18	1098.66	1.9	550.341	2	62.88	15377	2	177	187
P04745|AMY1_HUMAN	R.GHGAGGASILTFWDAR.L	Y	69.26	1614.79	1.5	539.271	3	58.22	14076	3	319	334
P04745|AMY1_HUMAN	K.IAEYMNHLIDIGVAGFR.I	Y	66.12	1917.98	-0.3	640.333	3	63.66	15599	1	194	210
P04745|AMY1_HUMAN	R.DFPAVPYSGWDFNDGK.C	Y	62.66	1813.79	0.3	907.905	2	61.24	14922	2	140	155
P04745|AMY1_HUMAN	R.NVVDGQPFTNWYDNGSNQVAFGR.G	Y	60.88	2584.17	2.4	862.4	3	59.66	14484	2	414	436
P04745|AMY1_HUMAN	R.SGNEDEFR.N	Y	57.9	952.389	1.8	477.202	2	18.38	2468	1	88	95
P04745|AMY1_HUMAN	K.IAEYM(+15.99)NHLIDIGVAGFR.I	Y	52.45	1933.97	-2.8	645.663	3	55.29	13245	1	194	210	Oxidation (M)
P04745|AMY1_HUMAN	K.M(+15.99)AVGFMLAHPYGFTR.V	Y	50.07	1712.82	1.3	571.947	3	52.37	12427	2	338	352	Oxidation (M)
P04745|AMY1_HUMAN	R.YQPVSYK.L	Y	47.89	883.444	0.9	442.73	2	22.84	3789	2	77	83
P04745|AMY1_HUMAN	K.IYVSDDGK.A	Y	43.05	895.429	-0.5	448.721	2	19.44	2781	2	482	489
P04745|AMY1_HUMAN	K.M(+15.99)AVGFM(+15.99)LAHPYGFTR.V	Y	40.94	1728.81	0.6	577.278	3	47.67	11098	2	338	352	Oxidation (M)
P04745|AMY1_HUMAN	R.NM(+15.99)VNFR.N	Y	34.47	795.37	0.7	398.692	2	20.97	3230	2	408	413	Oxidation (M)
P04745|AMY1_HUMAN	K.MAVGFMLAHPYGFTR.V	Y	30.61	1696.82	1	566.615	3	56.85	13689	1	338	352
P02533|K1C14_HUMAN	R.APSTYGGGLSVSSSR.F	Y	78.25	1424.69	2.9	713.354	2	29.7	5847	2	42	56
P02533|K1C14_HUMAN	K.TEELNREVATNSELVQSGK.S	N	74.33	2103.04	2.2	702.024	3	33.42	6941	2	310	328
P02533|K1C14_HUMAN	K.ASLENSLEETK.G	N	69.56	1219.59	1.3	610.805	2	31.9	6499	2	353	363
P02533|K1C14_HUMAN	K.VTMQNLNDR.L	N	66.72	1089.52	1.5	545.77	2	25.47	4584	2	117	125
P02533|K1C14_HUMAN	R.EVATNSELVQSGK.S	N	65.18	1360.68	2	681.35	2	24.25	4219	1	316	328
P02533|K1C14_HUMAN	R.VLDELTLAR.A	N	64.12	1028.59	1.4	515.301	2	43.77	9962	2	224	232
P02533|K1C14_HUMAN	K.VTM(+15.99)QNLNDRLASYLDK.V	N	60.38	1895.94	2.1	948.98	2	45.88	10579	4	117	132	Oxidation (M)
P02533|K1C14_HUMAN	K.VTM(+15.99)QNLNDR.L	N	59.84	1105.52	0.9	553.767	2	16.01	1769	6	117	125	Oxidation (M)
P02533|K1C14_HUMAN	K.TRLEQEIATYR.R	N	59.62	1378.72	2	460.582	3	35.02	7404	1	406	416
P02533|K1C14_HUMAN	K.DAEEWFFTK.T	Y	59.46	1171.52	1.3	586.767	2	56.38	13553	2	301	309
P02533|K1C14_HUMAN	R.LLEGEDAHLSSSQFSSGSQSSR.D	Y	54.87	2308.06	1.8	770.361	3	35.19	7455	1	418	439
P02533|K1C14_HUMAN	R.LASYLDK.V	N	54.82	808.433	2.5	405.225	2	26.79	4982	2	126	132
P02533|K1C14_HUMAN	R.LAADDFR.T	N	53.15	806.392	1.6	404.204	2	28.58	5507	2	195	201
P02533|K1C14_HUMAN	K.VTMQNLNDRLASYLDK.V	N	46.87	1879.95	1	627.657	3	52.79	12544	1	117	132
P02533|K1C14_HUMAN	K.TRLEQEIATYRR.L	N	46.81	1534.82	1.3	512.615	3	31	6230	2	406	417
P02533|K1C14_HUMAN	R.ILNEM(+15.99)RDQYEK.M	N	27.79	1453.69	0.8	485.57	3	20.09	2966	2	283	293	Oxidation (M)
P00736|C1R_HUMAN	K.TLDEFTIIQNLQPQYQFR.D	Y	81.66	2253.14	2.3	1127.58	2	68.16	16854	4	314	331
P00736|C1R_HUMAN	R.ESEQGVYTC(+57.02)TAQGIWK.N	Y	80.14	1855.84	1.7	928.929	2	44.31	10118	2	421	436	Carbamidomethylation
P00736|C1R_HUMAN	R.YTTTM(+15.99)GVNTYK.A	Y	75.41	1293.59	1.3	647.804	2	22.65	3735	2	389	399	Oxidation (M)
P00736|C1R_HUMAN	K.QRPPDLDTSSNAVDLLFFTDESGDSR.G	Y	71.58	2881.34	1.7	961.454	3	64.09	15717	2	271	296
P00736|C1R_HUMAN	K.LVFQQFDLEPSEGC(+57.02)FYDYVK.I	Y	67.71	2483.14	-0.1	828.719	3	67.92	16788	4	58	77	Carbamidomethylation
P00736|C1R_HUMAN	R.FC(+57.02)GQLGSPLGNPPGKK.E	Y	67.26	1655.85	0.3	552.956	3	35.61	7582	2	88	103	Carbamidomethylation
P00736|C1R_HUMAN	K.NIGEFC(+57.02)GK.Q	Y	58.85	923.417	1.6	462.717	2	27.09	5073	2	263	270	Carbamidomethylation
P00736|C1R_HUMAN	K.GFLAYYQAVDLDEC(+57.02)ASR.S	Y	52.18	1976.89	1.1	659.973	3	57.9	13988	1	133	149	Carbamidomethylation
P00736|C1R_HUMAN	R.IQYYC(+57.02)HEPYYK.M	Y	46.09	1562.69	0.9	521.903	3	30.85	6185	2	402	412	Carbamidomethylation
P00736|C1R_HUMAN	K.LRYTTEIIK.C	Y	42.01	1135.66	1.8	379.561	3	32.78	6757	1	300	308
P00736|C1R_HUMAN	K.QGYQLIEGNQVLHSFTAVC(+57.02)QDDGTWHR.A	Y	31.99	3158.46	1.9	790.625	4	57.66	13917	1	340	366	Carbamidomethylation
P00736|C1R_HUMAN	R.C(+57.02)LPVC(+57.02)GKPVNPVEQR.Q	Y	30.69	1751.88	1.9	584.969	3	32.48	6668	1	447	461	Carbamidomethylation
P04004|VTNC_HUMAN	K.LIRDVWGIEGPIDAAFTR.I	Y	78.18	2028.08	0.9	677.034	3	64.3	15777	4	195	212
P04004|VTNC_HUMAN	R.DVWGIEGPIDAAFTR.I	Y	76.21	1645.81	0.1	823.912	2	67.47	16661	3	198	212
P04004|VTNC_HUMAN	R.FEDGVLDPDYPR.N	Y	75.4	1421.65	1.3	711.831	2	44.45	10159	2	230	241
P04004|VTNC_HUMAN	R.DWHGVPGQVDAAMAGR.I	Y	71.37	1665.77	0.9	833.892	2	43.5	9885	3	338	353
P04004|VTNC_HUMAN	R.DWHGVPGQVDAAM(+15.99)AGR.I	Y	69.49	1681.76	1.8	561.596	3	34.78	7334	4	338	353	Oxidation (M)
P04004|VTNC_HUMAN	R.GQYC(+57.02)YELDEK.A	Y	62.53	1303.54	1.4	652.778	2	31.33	6328	2	177	186	Carbamidomethylation
P04004|VTNC_HUMAN	R.IYISGM(+15.99)APRPSLAK.K	Y	61.18	1518.82	2.7	760.421	2	33.99	7109	4	354	367	Oxidation (M)
P04004|VTNC_HUMAN	K.GRC(+57.02)TEGFNVDKK.C	Y	50.73	1409.67	1.7	470.899	3	17.81	2301	2	26	37	Carbamidomethylation
P04004|VTNC_HUMAN	R.TSAGTRQPQFISR.D	Y	49.23	1447.75	2.4	483.593	3	24.97	4437	4	325	337
P04004|VTNC_HUMAN	R.VYFFK.G	Y	48.61	702.374	2.5	352.195	2	41.92	9415	2	271	275
P04004|VTNC_HUMAN	K.AVRPGYPK.L	Y	47.68	886.502	0.3	444.259	2	16.24	1835	1	187	194
P04004|VTNC_HUMAN	K.GSQYWR.F	Y	45.54	795.366	1.6	398.691	2	24.98	4440	2	224	229
P04004|VTNC_HUMAN	R.ERVYFFK.G	Y	45.36	987.518	0.3	494.766	2	37.43	8117	2	269	275
P04004|VTNC_HUMAN	R.QPQFISR.D	Y	28.85	874.466	1.1	438.241	2	26.53	4905	2	331	337
O95678|K2C75_HUMAN	K.YEELQVTAGR.H	N	75.84	1164.58	1.3	583.297	2	31.11	6264	2	346	355
O95678|K2C75_HUMAN	R.NLDLDSIIAEVK.A	N	74.41	1328.72	0.6	665.367	2	65.43	16091	2	313	324
O95678|K2C75_HUMAN	R.AEAESWYQTK.Y	N	70.72	1211.55	1.4	606.781	2	30.72	6147	2	336	345
O95678|K2C75_HUMAN	K.LALDVEIATYR.K	N	66.43	1262.69	0.7	632.351	2	52.6	12492	2	442	452
O95678|K2C75_HUMAN	R.SRAEAESWYQTK.Y	N	65.75	1454.68	1.9	728.348	2	27.1	5078	4	334	345
O95678|K2C75_HUMAN	K.DVDAAYM(+15.99)NK.V	N	60.45	1041.44	0.6	521.729	2	18.65	2551	2	259	267	Oxidation (M)
O95678|K2C75_HUMAN	K.LLEGEEC(+57.02)R.L	N	60.38	1004.46	1.4	503.238	2	21.37	3346	1	454	461	Carbamidomethylation
O95678|K2C75_HUMAN	K.DVDAAYMNK.V	N	59.28	1025.45	0.1	513.732	2	25.28	4532	2	259	267
O95678|K2C75_HUMAN	K.FASFIDK.V	N	56.09	826.423	1.3	414.219	2	38.21	8344	2	160	166
O95678|K2C75_HUMAN	R.YEDEINKR.T	N	45.15	1065.51	0.9	533.762	2	15.95	1751	3	239	246
O95678|K2C75_HUMAN	K.LALDVEIATYRK.L	N	44.53	1390.78	1.9	464.602	3	45.86	10570	2	442	453
O95678|K2C75_HUMAN	R.KLLEGEEC(+57.02)R.L	N	39.06	1132.55	-0.5	378.525	3	19.16	2704	2	453	461	Carbamidomethylation
O95678|K2C75_HUMAN	R.FLEQQNK.V	N	38.16	905.461	1.3	453.738	2	18.94	2638	2	169	175
O95678|K2C75_HUMAN	K.VRFLEQQNK.V	N	35.58	1160.63	0.9	581.323	2	24.87	4410	3	167	175
P01871|IGHM_HUMAN	K.QVGSGVTTDQVQAEAK.E	Y	86.49	1616.8	1	809.408	2	25.96	4732	2	154	169
P01871|IGHM_HUMAN	K.LIC(+57.02)QATGFSPR.Q	N	74.81	1248.63	1.2	625.322	2	34.79	7337	2	132	142	Carbamidomethylation
P01871|IGHM_HUMAN	K.YVTSAPM(+15.99)PEPQAPGR.Y	N	74.72	1615.77	-0.2	808.89	2	27.68	5247	3	377	391	Oxidation (M)
P01871|IGHM_HUMAN	K.YAATSQVLLPSK.D	Y	72.21	1276.7	1.4	639.36	2	36.99	7985	2	65	76
P01871|IGHM_HUMAN	K.GVALHRPDVYLLPPAR.E	N	58.36	1773	0.4	592.009	3	44.08	10054	2	323	338
P01871|IGHM_HUMAN	K.YVTSAPMPEPQAPGR.Y	N	58.19	1599.77	-0.9	800.892	2	34.67	7308	1	377	391
P01871|IGHM_HUMAN	K.NVPLPVIAELPPK.V	Y	54.88	1385.83	0.9	693.922	2	58.26	14089	6	100	112
P01871|IGHM_HUMAN	R.DGFFGNPR.K	N	53.65	908.414	1	455.215	2	37.96	8274	1	121	128
P01871|IGHM_HUMAN	R.VFAIPPSFASIFLTK.S	N	51.12	1636.92	2.1	819.47	2	78.25	19427	6	224	238
P01871|IGHM_HUMAN	K.DVM(+15.99)QGTDEHVVC(+57.02)K.V	Y	51.08	1532.66	1.3	767.338	2	18.68	2563	3	77	89	Oxidation (M); Carbamidomethylation
P01871|IGHM_HUMAN	R.GFPSVLR.G	Y	45.11	774.439	1.5	388.227	2	41.5	9295	2	55	61
P13646|K1C13_HUMAN	K.EVSTNTAM(+15.99)IQTSK.T	Y	66.7	1424.68	0.8	713.349	2	21.46	3375	2	306	318	Oxidation (M)
P13646|K1C13_HUMAN	R.QSVEADINGLR.R	N	65.86	1200.61	1.3	601.313	2	38.35	8386	2	202	212
P13646|K1C13_HUMAN	K.ILTATIENNR.V	Y	62.59	1143.62	2.1	572.821	2	30.43	6060	2	166	175
P13646|K1C13_HUMAN	K.YENELALR.Q	N	62.45	1006.51	2.3	504.263	2	33.42	6942	2	194	201
P13646|K1C13_HUMAN	K.TRLEQEIATYR.S	N	59.62	1378.72	2	460.582	3	35.02	7404	1	396	406
P13646|K1C13_HUMAN	R.VILEIDNAR.L	N	59.39	1041.58	1.5	521.799	2	38.57	8448	2	176	184
P13646|K1C13_HUMAN	K.ITMQNLNDR.L	N	57.63	1103.54	2.3	552.778	2	29.58	5815	2	106	114
P13646|K1C13_HUMAN	R.SLLEGQDAK.M	N	55.99	959.492	1.1	480.754	2	24.25	4218	1	407	415
P13646|K1C13_HUMAN	R.VLAEM(+15.99)REQYEAM(+15.99)AER.N	Y	53.46	1856.84	-0.5	619.953	3	24.56	4313	2	273	287	Oxidation (M)
P13646|K1C13_HUMAN	R.LAADDFR.L	N	53.15	806.392	1.6	404.204	2	28.58	5507	2	185	191
P13646|K1C13_HUMAN	R.VLDELTLSK.T	Y	51.45	1016.58	0.9	509.295	2	40.78	9089	1	214	222
P13646|K1C13_HUMAN	R.LKYENELALR.Q	N	48.12	1247.69	3	416.904	3	36	7696	2	192	201
P13646|K1C13_HUMAN	R.VLAEMREQYEAM(+15.99)AER.N	Y	46.56	1840.84	0.3	614.622	3	32.49	6671	2	273	287	Oxidation (M)
P13646|K1C13_HUMAN	R.QSVEADINGLRR.V	N	42.12	1356.71	1.2	679.364	2	34.21	7175	4	202	213
P13646|K1C13_HUMAN	R.EQYEAM(+15.99)AER.N	Y	41.34	1141.47	1.5	571.744	2	16.39	1881	2	279	287	Oxidation (M)
P13646|K1C13_HUMAN	R.LAADDFRLK.Y	N	34.8	1047.57	1.4	350.198	3	37.02	7999	2	185	193
P13646|K1C13_HUMAN	K.ILTATIENNRVILEIDNAR.L	Y	29.79	2167.2	2	723.407	3	55.23	13231	1	166	184
P13646|K1C13_HUMAN	K.TEITELRR.T	Y	28.64	1016.56	2	509.289	2	23.47	3985	1	319	326
P12035|K2C3_HUMAN	K.AEAEALYQTK.L	N	67.62	1122.56	1.4	562.286	2	25.58	4620	2	387	396
P12035|K2C3_HUMAN	K.LALDVEIATYR.K	N	66.43	1262.69	0.7	632.351	2	52.6	12492	2	493	503
P12035|K2C3_HUMAN	R.TAAENEFVTLKK.D	N	65.23	1349.72	1.8	675.868	2	32.2	6586	4	298	309
P12035|K2C3_HUMAN	R.TAAENEFVTLK.K	N	62.72	1221.62	1.2	611.82	2	39.45	8700	2	298	308
P12035|K2C3_HUMAN	K.FASFIDK.V	N	56.09	826.423	1.3	414.219	2	38.21	8344	2	209	215
P12035|K2C3_HUMAN	R.LLRDYQELMNVK.L	N	54.6	1520.8	1.3	507.942	3	45.37	10429	2	481	492
P12035|K2C3_HUMAN	K.KYEDEINKR.T	N	52.85	1193.6	0.3	597.809	2	15.59	1650	3	289	297
P12035|K2C3_HUMAN	R.DYQELM(+15.99)NVK.L	N	50.84	1154.53	2.5	578.273	2	29.5	5792	2	484	492	Oxidation (M)
P12035|K2C3_HUMAN	K.LLEGEEYR.M	N	49.46	1007.49	0.4	504.754	2	27.6	5225	1	505	512
P12035|K2C3_HUMAN	K.KKYEDEINKR.T	N	47.36	1321.7	-0.2	441.574	3	14.08	1206	2	288	297
P12035|K2C3_HUMAN	K.YEDEINKR.T	N	45.15	1065.51	0.9	533.762	2	15.95	1751	3	290	297
P12035|K2C3_HUMAN	K.LALDVEIATYRK.L	N	44.53	1390.78	1.9	464.602	3	45.86	10570	2	493	504
P12035|K2C3_HUMAN	R.FLEQQNK.V	N	38.16	905.461	1.3	453.738	2	18.94	2638	2	218	224
P12035|K2C3_HUMAN	K.VRFLEQQNK.V	N	35.58	1160.63	0.9	581.323	2	24.87	4410	3	216	224
P12035|K2C3_HUMAN	R.SKAEAEALYQTK.L	N	35.17	1337.68	1.4	669.85	2	22.95	3825	1	385	396
P12035|K2C3_HUMAN	R.LDSELK.N	N	27.94	703.375	-0.7	352.695	2	19.01	2659	1	272	277
P04196|HRG_HUMAN	R.ADLFYDVEALDLESPK.N	Y	84.01	1823.88	1.4	912.95	2	66.71	16448	3	220	235
P04196|HRG_HUMAN	K.DSPVLIDFFEDTER.Y	Y	79.72	1681.78	1.7	841.9	2	71.15	17678	4	140	153
P04196|HRG_HUMAN	R.VRGGEGTGYFVDFSVR.N	Y	64.78	1744.85	-0.2	582.625	3	49.24	11544	2	186	201
P04196|HRG_HUMAN	R.GGEGTGYFVDFSVR.N	Y	63.87	1489.68	2.4	745.851	2	54.01	12888	1	188	201
P04196|HRG_HUMAN	K.YKEENDDFASFR.V	Y	60.55	1519.66	2.3	507.561	3	35.17	7448	3	165	176
P04196|HRG_HUMAN	R.DGYLFQLLR.I	Y	57.38	1123.6	1.1	562.809	2	66.71	16447	2	44	52
P04196|HRG_HUMAN	R.RPSEIVIGQC(+57.02)K.V	Y	57.34	1285.68	1.3	643.849	2	25.85	4700	1	96	106	Carbamidomethylation
P04196|HRG_HUMAN	R.RRDGYLFQLLR.I	Y	33.12	1435.8	0.9	479.609	3	51.54	12192	1	42	52
P08779|K1C16_HUMAN	K.ASLENSLEETK.G	N	69.56	1219.59	1.3	610.805	2	31.9	6499	2	355	365
P08779|K1C16_HUMAN	K.VTMQNLNDR.L	N	66.72	1089.52	1.5	545.77	2	25.47	4584	2	119	127
P08779|K1C16_HUMAN	K.EVASNSELVQSSR.S	Y	65.94	1404.68	0.2	703.35	2	23.82	4089	2	318	330
P08779|K1C16_HUMAN	R.VLDELTLAR.T	N	64.12	1028.59	1.4	515.301	2	43.77	9962	2	226	234
P08779|K1C16_HUMAN	K.VTM(+15.99)QNLNDRLASYLDK.V	N	60.38	1895.94	2.1	948.98	2	45.88	10579	4	119	134	Oxidation (M)
P08779|K1C16_HUMAN	K.VTM(+15.99)QNLNDR.L	N	59.84	1105.52	0.9	553.767	2	16.01	1769	6	119	127	Oxidation (M)
P08779|K1C16_HUMAN	K.TRLEQEIATYR.R	N	59.62	1378.72	2	460.582	3	35.02	7404	1	408	418
P08779|K1C16_HUMAN	R.LASYLDK.V	N	54.82	808.433	2.5	405.225	2	26.79	4982	2	128	134
P08779|K1C16_HUMAN	R.LAADDFR.T	N	53.15	806.392	1.6	404.204	2	28.58	5507	2	197	203
P08779|K1C16_HUMAN	R.EVFTSSSSSSSR.Q	Y	53.12	1259.56	0.9	630.789	2	19.1	2685	1	442	453
P08779|K1C16_HUMAN	K.VTMQNLNDRLASYLDK.V	N	46.87	1879.95	1	627.657	3	52.79	12544	1	119	134
P08779|K1C16_HUMAN	K.TRLEQEIATYRR.L	N	46.81	1534.82	1.3	512.615	3	31	6230	2	408	419
P08779|K1C16_HUMAN	R.TKYEHELALR.Q	Y	26.56	1258.67	-0.7	420.563	3	24.93	4428	1	204	213
Q01546|K22O_HUMAN	R.AQYEEIAQR.S	N	66.45	1106.54	1.5	554.276	2	24.15	4187	3	359	367
Q01546|K22O_HUMAN	K.LALDVEIATYR.K	N	66.43	1262.69	0.7	632.351	2	52.6	12492	2	476	486
Q01546|K22O_HUMAN	K.LLEGEEC(+57.02)R.M	N	60.38	1004.46	1.4	503.238	2	21.37	3346	1	488	495	Carbamidomethylation
Q01546|K22O_HUMAN	K.FASFIDK.V	N	56.09	826.423	1.3	414.219	2	38.21	8344	2	194	200
Q01546|K22O_HUMAN	R.LLRDYQELMNVK.L	N	54.6	1520.8	1.3	507.942	3	45.37	10429	2	464	475
Q01546|K22O_HUMAN	K.KYEDEINKR.T	N	52.85	1193.6	0.3	597.809	2	15.59	1650	3	272	280
Q01546|K22O_HUMAN	R.DYQELM(+15.99)NVK.L	N	50.84	1154.53	2.5	578.273	2	29.5	5792	2	467	475	Oxidation (M)
Q01546|K22O_HUMAN	K.KKYEDEINKR.T	N	47.36	1321.7	-0.2	441.574	3	14.08	1206	2	271	280
Q01546|K22O_HUMAN	K.YEDEINKR.T	N	45.15	1065.51	0.9	533.762	2	15.95	1751	3	273	280
Q01546|K22O_HUMAN	K.LALDVEIATYRK.L	N	44.53	1390.78	1.9	464.602	3	45.86	10570	2	476	487
Q01546|K22O_HUMAN	R.KLLEGEEC(+57.02)R.M	N	39.06	1132.55	-0.5	378.525	3	19.16	2704	2	487	495	Carbamidomethylation
Q01546|K22O_HUMAN	R.FLEQQNK.V	N	38.16	905.461	1.3	453.738	2	18.94	2638	2	203	209
Q01546|K22O_HUMAN	K.VRFLEQQNK.V	N	35.58	1160.63	0.9	581.323	2	24.87	4410	3	201	209
P01834|IGKC_HUMAN	K.VDNALQSGNSQESVTEQDSK.D	Y	96.31	2134.96	0.7	1068.49	2	24.88	4412	4	42	61
P01834|IGKC_HUMAN	K.DSTYSLSSTLTLSK.A	Y	73.86	1501.75	1.9	751.884	2	48.43	11315	1	62	75
P01834|IGKC_HUMAN	K.SGTASVVC(+57.02)LLNNFYPR.E	Y	69.06	1796.89	1.3	899.452	2	68.3	16895	5	19	34	Carbamidomethylation
P01834|IGKC_HUMAN	K.VYAC(+57.02)EVTHQGLSSPVTK.S	Y	63.62	1874.92	1.7	625.982	3	32.39	6642	2	83	99	Carbamidomethylation
P01834|IGKC_HUMAN	TVAAPSVFIFPPSDEQLK.S	Y	57.23	1945.02	0.9	973.518	2	62.54	15286	6	1	18
P08697|A2AP_HUMAN	K.LGNQEPGGQTALK.S	Y	73.69	1311.68	1.2	656.847	2	22.9	3808	2	52	64
P08697|A2AP_HUMAN	R.LC(+57.02)QDLGPGAFR.L	Y	64.77	1232.6	0.3	617.306	2	39.38	8680	2	151	161	Carbamidomethylation
P08697|A2AP_HUMAN	R.DSFHLDEQFTVPVEM(+15.99)M(+15.99)QAR.T	Y	58.53	2311.02	1.6	771.35	3	51.47	12171	2	253	271	Oxidation (M)
P08697|A2AP_HUMAN	K.FDPSLTQR.D	Y	54.94	962.482	1.9	482.249	2	30.2	5993	2	245	252
P08697|A2AP_HUMAN	K.HQM(+15.99)DLVATLSQLGLQELFQAPDLR.G	Y	54.43	2738.41	1.6	913.811	3	82.45	20148	3	343	366	Oxidation (M)
P08697|A2AP_HUMAN	R.NKFDPSLTQR.D	Y	52.64	1204.62	1.8	603.318	2	26.66	4944	4	243	252
P08697|A2AP_HUMAN	R.DSFHLDEQFTVPVEM(+15.99)MQAR.T	Y	46.25	2295.03	1.5	766.018	3	56.24	13515	1	253	271	Oxidation (M)
P08697|A2AP_HUMAN	R.DSFHLDEQFTVPVEMM(+15.99)QAR.T	Y	45.73	2295.03	0.8	766.018	3	56.39	13559	1	253	271	Oxidation (M)
P08697|A2AP_HUMAN	R.WFLLEQPEIQVAHFPFK.N	Y	41.5	2128.11	1.2	710.38	3	71.62	17806	2	277	293
P08697|A2AP_HUMAN	K.SPPGVC(+57.02)SRDPTPEQTHR.L	Y	40.82	1919.89	0.6	640.971	3	18.24	2427	4	65	81	Carbamidomethylation
P08697|A2AP_HUMAN	R.LQQVLHAGSGPC(+57.02)LPHLLSR.L	Y	38.67	2082.12	2.2	521.537	4	46.99	10901	2	132	150	Carbamidomethylation
P08697|A2AP_HUMAN	K.EDFLEQSEQLFGAKPVSLTGK.Q	Y	38.61	2322.17	0.8	775.066	3	64.94	15955	1	176	196
P08697|A2AP_HUMAN	K.GFPIKEDFLEQSEQLFGAKPVSLTGK.Q	Y	30.41	2864.5	1.6	717.132	4	66.13	16286	2	171	196
P08697|A2AP_HUMAN	R.DSFHLDEQFTVPVEMMQAR.T	Y	28.87	2279.04	3.5	760.688	3	62.97	15406	1	253	271
P08697|A2AP_HUMAN	R.DPTPEQTHR.L	Y	27.24	1079.5	-0.1	360.84	3	13.2	964	2	73	81
Q96IY4|CBPB2_HUMAN	R.DTGTYGFLLPER.Y	Y	72.48	1367.67	1.3	684.844	2	54.6	13050	2	388	399
Q96IY4|CBPB2_HUMAN	K.SKDHEELSLVASEAVR.A	Y	68.58	1768.9	1.8	590.64	3	36.65	7890	3	327	342
Q96IY4|CBPB2_HUMAN	R.SFYANNHC(+57.02)IGTDLNR.N	Y	57.88	1780.8	0.9	594.606	3	34.27	7190	2	243	257	Carbamidomethylation
Q96IY4|CBPB2_HUMAN	K.IHIGSSFEK.Y	Y	56.09	1016.53	1.2	509.272	2	28.73	5555	2	147	155
Q96IY4|CBPB2_HUMAN	K.YSFTIELR.D	Y	54.99	1027.53	0.6	514.774	2	52.02	12330	2	380	387
Q96IY4|CBPB2_HUMAN	K.IAWHVIR.N	Y	49.38	893.524	1	447.769	2	36.29	7783	1	415	421
Q96IY4|CBPB2_HUMAN	K.NAIWIDC(+57.02)GIHAR.E	Y	44.97	1424.7	1.1	475.907	3	42.08	9466	1	172	183	Carbamidomethylation
Q96IY4|CBPB2_HUMAN	K.YPLYVLK.V	Y	43.52	894.521	0.2	448.268	2	45.21	10381	2	156	162
Q96IY4|CBPB2_HUMAN	K.AYISM(+15.99)HSYSQHIVFPYSYTR.S	Y	42.69	2465.15	0.7	617.295	4	45.59	10494	4	305	324	Oxidation (M)
Q96IY4|CBPB2_HUMAN	K.AVASFLRR.N	Y	38.18	918.54	1.2	460.278	2	30.55	6096	1	291	298
Q96IY4|CBPB2_HUMAN	K.AYISMHSYSQHIVFPYSYTR.S	Y	37.95	2449.15	1.4	817.393	3	50.45	11887	1	305	324
Q96IY4|CBPB2_HUMAN	K.AVASFLR.R	Y	36.26	762.439	0.1	382.227	2	37.23	8057	1	291	297
Q5XKE5|K2C79_HUMAN	R.NLDLDSIIAEVK.A	N	74.41	1328.72	0.6	665.367	2	65.43	16091	2	308	319
Q5XKE5|K2C79_HUMAN	K.LALDVEIATYR.K	N	66.43	1262.69	0.7	632.351	2	52.6	12492	2	437	447
Q5XKE5|K2C79_HUMAN	K.FASFIDK.V	N	56.09	826.423	1.3	414.219	2	38.21	8344	2	153	159
Q5XKE5|K2C79_HUMAN	R.LLRDYQELMNVK.L	N	54.6	1520.8	1.3	507.942	3	45.37	10429	2	425	436
Q5XKE5|K2C79_HUMAN	K.NKYEDEINK.H	N	53.55	1151.55	1.5	576.781	2	18.81	2598	3	232	240
Q5XKE5|K2C79_HUMAN	R.DYQELM(+15.99)NVK.L	N	50.84	1154.53	2.5	578.273	2	29.5	5792	2	428	436	Oxidation (M)
Q5XKE5|K2C79_HUMAN	K.LALDVEIATYRK.L	N	44.53	1390.78	1.9	464.602	3	45.86	10570	2	437	448
Q5XKE5|K2C79_HUMAN	R.GRLDSELR.N	N	43.32	944.504	0.7	473.26	2	21.8	3475	2	214	221
Q5XKE5|K2C79_HUMAN	R.FLEQQNK.V	N	38.16	905.461	1.3	453.738	2	18.94	2638	2	162	168
Q5XKE5|K2C79_HUMAN	K.VRFLEQQNK.V	N	35.58	1160.63	0.9	581.323	2	24.87	4410	3	160	168
Q86Y46|K2C73_HUMAN	R.NLDLDSIIAEVR.A	N	77.77	1356.72	2	679.371	2	66.4	16363	2	296	307
Q86Y46|K2C73_HUMAN	R.FLEQQNQVLETK.W	N	76.32	1475.76	0.1	738.888	2	36.14	7741	3	152	163
Q86Y46|K2C73_HUMAN	K.AEAEALYQTK.F	N	67.62	1122.56	1.4	562.286	2	25.58	4620	2	319	328
Q86Y46|K2C73_HUMAN	K.LLEGEEC(+57.02)R.M	N	60.38	1004.46	1.4	503.238	2	21.37	3346	1	437	444	Carbamidomethylation
Q86Y46|K2C73_HUMAN	K.FASFIDK.V	N	56.09	826.423	1.3	414.219	2	38.21	8344	2	143	149
Q86Y46|K2C73_HUMAN	R.KLLEGEEC(+57.02)R.M	N	39.06	1132.55	-0.5	378.525	3	19.16	2704	2	436	444	Carbamidomethylation
Q86Y46|K2C73_HUMAN	K.SKAEAEALYQTK.F	N	35.17	1337.68	1.4	669.85	2	22.95	3825	1	317	328
P08571|CD14_HUMAN	R.AFPALTSLDLSDNPGLGER.G	Y	89.13	1971.99	1.8	987.004	2	61.87	15099	2	192	210
P08571|CD14_HUMAN	R.LTVGAAQVPAQLLVGALR.V	Y	62.86	1776.06	2	889.04	2	67.17	16578	2	94	111
P08571|CD14_HUMAN	K.FPAIQNLALR.N	Y	57.34	1141.66	2.7	571.839	2	52.91	12581	2	221	230
P08571|CD14_HUMAN	K.VLSIAQAHSPAFSC(+57.02)EQVR.A	Y	53.7	1998.99	2.5	667.341	3	40.79	9092	2	174	191	Carbamidomethylation
P08571|CD14_HUMAN	K.ITGTM(+15.99)PPLPLEATGLALSSLR.L	Y	52.69	2153.18	2	1077.6	2	71.05	17655	5	128	148	Oxidation (M)
P08571|CD14_HUMAN	R.VLDLSC(+57.02)NR.L	Y	52.43	975.481	1.9	488.749	2	29.17	5692	1	301	308	Carbamidomethylation
P08571|CD14_HUMAN	K.ELTLEDLK.I	Y	36.23	959.518	2	480.767	2	45.02	10327	2	120	127
P00450|CERU_HUMAN	K.DLYSGLIGPLIVC(+57.02)R.R	Y	70.62	1574.85	1.4	788.433	2	69.83	17317	2	888	901	Carbamidomethylation
P00450|CERU_HUMAN	R.QSEDSTFYLGER.T	Y	64.77	1430.63	1.3	716.324	2	39.04	8586	2	721	732
P00450|CERU_HUMAN	R.KAEEEHLGILGPQLHADVGDK.V	Y	64	2255.15	1	564.796	4	39.39	8685	2	799	819
P00450|CERU_HUMAN	K.VNKDDEEFIESNK.M	Y	63.01	1565.72	1	522.915	3	26.03	4755	2	945	957
P00450|CERU_HUMAN	R.M(+15.99)FTTAPDQVDKEDEDFQESNK.M	Y	49.87	2489.05	2.2	830.694	3	34.82	7350	2	599	619	Oxidation (M)
P00450|CERU_HUMAN	R.SGAGTEDSAC(+57.02)IPWAYYSTVDQVK.D	Y	48.94	2504.12	1.3	835.714	3	57.28	13810	2	865	887	Carbamidomethylation
P00450|CERU_HUMAN	K.EVGPTNADPVC(+57.02)LAK.M	Y	48.26	1469.72	4.1	735.869	2	36.67	7898	1	524	537	Carbamidomethylation
P00450|CERU_HUMAN	R.MFTTAPDQVDKEDEDFQESNK.M	Y	47.64	2473.06	2.2	825.362	3	38.02	8290	2	599	619
P00450|CERU_HUMAN	R.IYHSHIDAPK.D	Y	43.56	1179.6	1.8	394.209	3	18.05	2372	1	178	187
P00450|CERU_HUMAN	K.YTVNQC(+57.02)R.R	Y	32.04	939.423	0.2	470.719	2	16.19	1822	1	713	719	Carbamidomethylation
P00450|CERU_HUMAN	R.QYTDSTFRVPVER.K	Y	30.2	1596.79	1.5	533.271	3	37.72	8202	2	786	798
P05156|CFAI_HUMAN	R.GLETSLAEC(+57.02)TFTK.R	Y	79.49	1455.69	-0.4	728.853	2	44.78	10254	2	188	200	Carbamidomethylation
P05156|CFAI_HUMAN	K.HGNTDSEGIVEVK.L	Y	69.63	1383.66	1.3	692.84	2	24.16	4192	2	118	130
P05156|CFAI_HUMAN	R.TMGYQDFADVVC(+57.02)YTQK.A	Y	66.4	1924.83	-0.1	963.424	2	55.68	13358	1	203	218	Carbamidomethylation
P05156|CFAI_HUMAN	K.LPYQC(+57.02)PK.N	Y	50.15	904.448	1.2	453.232	2	23.2	3901	1	63	69	Carbamidomethylation
P05156|CFAI_HUMAN	K.VFC(+57.02)QPWQR.C	Y	48.88	1119.53	1.5	560.772	2	37.58	8164	1	46	53	Carbamidomethylation
P05156|CFAI_HUMAN	R.SFPTYC(+57.02)QQK.S	Y	38.47	1157.52	1	579.767	2	27.74	5265	2	81	89	Carbamidomethylation
P05156|CFAI_HUMAN	R.C(+57.02)IEGTC(+57.02)VC(+57.02)K.L	Y	36.4	1125.46	0.8	563.739	2	20.33	3040	2	54	62	Carbamidomethylation
P05156|CFAI_HUMAN	K.VTYTSQEDLVEKK.C	Y	27.81	1538.78	1.2	513.936	3	27.01	5050	2	20	32
P05156|CFAI_HUMAN	K.SLEC(+57.02)LHPGTK.F	Y	27.39	1140.56	0.9	381.194	3	23.07	3861	1	90	99	Carbamidomethylation
P19012|K1C15_HUMAN	R.VLDELTLAR.T	N	64.12	1028.59	1.4	515.301	2	43.77	9962	2	215	223
P19012|K1C15_HUMAN	K.YENELALR.Q	N	62.45	1006.51	2.3	504.263	2	33.42	6942	2	195	202
P19012|K1C15_HUMAN	K.TRLEQEIATYR.S	N	59.62	1378.72	2	460.582	3	35.02	7404	1	397	407
P19012|K1C15_HUMAN	R.VILEIDNAR.L	N	59.39	1041.58	1.5	521.799	2	38.57	8448	2	177	185
P19012|K1C15_HUMAN	K.ITMQNLNDR.L	N	57.63	1103.54	2.3	552.778	2	29.58	5815	2	107	115
P19012|K1C15_HUMAN	R.SLLEGQDAK.M	N	55.99	959.492	1.1	480.754	2	24.25	4218	1	408	416
P19012|K1C15_HUMAN	R.LASYLDK.V	N	54.82	808.433	2.5	405.225	2	26.79	4982	2	116	122
P19012|K1C15_HUMAN	R.LAADDFR.L	N	53.15	806.392	1.6	404.204	2	28.58	5507	2	186	192
P19012|K1C15_HUMAN	R.LKYENELALR.Q	N	48.12	1247.69	3	416.904	3	36	7696	2	193	202
P19012|K1C15_HUMAN	R.LAADDFRLK.Y	N	34.8	1047.57	1.4	350.198	3	37.02	7999	2	186	194
Q04695|K1C17_HUMAN	K.TEELNREVATNSELVQSGK.S	N	74.33	2103.04	2.2	702.024	3	33.42	6941	2	279	297
Q04695|K1C17_HUMAN	R.EVATNSELVQSGK.S	N	65.18	1360.68	2	681.35	2	24.25	4219	1	285	297
Q04695|K1C17_HUMAN	R.VLDELTLAR.A	N	64.12	1028.59	1.4	515.301	2	43.77	9962	2	193	201
Q04695|K1C17_HUMAN	K.TRLEQEIATYR.R	N	59.62	1378.72	2	460.582	3	35.02	7404	1	375	385
Q04695|K1C17_HUMAN	R.LASYLDK.V	N	54.82	808.433	2.5	405.225	2	26.79	4982	2	95	101
Q04695|K1C17_HUMAN	R.LAADDFR.T	N	53.15	806.392	1.6	404.204	2	28.58	5507	2	164	170
Q04695|K1C17_HUMAN	K.TRLEQEIATYRR.L	N	46.81	1534.82	1.3	512.615	3	31	6230	2	375	386
Q04695|K1C17_HUMAN	R.ILNEM(+15.99)RDQYEK.M	N	27.79	1453.69	0.8	485.57	3	20.09	2966	2	252	262	Oxidation (M)
P05787|K2C8_HUMAN	K.LALDIEIATYR.K	N	76.2	1276.7	1.7	639.36	2	57.26	13802	3	382	392
P05787|K2C8_HUMAN	K.NKYEDEINKR.T	N	59.87	1307.65	1.1	654.832	2	18.67	2557	4	177	186
P05787|K2C8_HUMAN	R.EYQELM(+15.99)NVK.L	N	57.63	1168.54	1.5	585.28	2	26.86	5005	2	373	381	Oxidation (M)
P05787|K2C8_HUMAN	K.FASFIDK.V	N	56.09	826.423	1.3	414.219	2	38.21	8344	2	102	108
P05787|K2C8_HUMAN	K.NKYEDEINK.R	N	53.55	1151.55	1.5	576.781	2	18.81	2598	3	177	185
P05787|K2C8_HUMAN	K.YEDEINKR.T	N	45.15	1065.51	0.9	533.762	2	15.95	1751	3	179	186
P05787|K2C8_HUMAN	R.FLEQQNK.M	N	38.16	905.461	1.3	453.738	2	18.94	2638	2	111	117
P05787|K2C8_HUMAN	K.VRFLEQQNK.M	N	35.58	1160.63	0.9	581.323	2	24.87	4410	3	109	117
P00738|HPT_HUMAN	K.SC(+57.02)AVAEYGVYVK.V	Y	71.19	1344.64	1.8	673.328	2	38.51	8433	2	380	391	Carbamidomethylation
P00738|HPT_HUMAN	R.VGYVSGWGR.N	Y	59.19	979.487	2.7	490.752	2	36.63	7882	2	278	286
P00738|HPT_HUMAN	K.DIAPTLTLYVGK.K	Y	57.55	1289.72	1.4	645.87	2	54.18	12936	1	216	227
P00738|HPT_HUMAN	K.SPVGVQPILNEHTFC(+57.02)AGM(+15.99)SK.Y	Y	55.51	2187.05	0.8	730.023	3	44.64	10214	2	326	345	Carbamidomethylation; Oxidation (M)
P00738|HPT_HUMAN	K.LRTEGDGVYTLNNEK.Q	Y	52.25	1707.84	1	570.289	3	29.29	5728	1	117	131
P00738|HPT_HUMAN	K.DYAEVGR.V	Y	44.3	808.371	-0.6	405.193	2	20.04	2954	1	271	277
P00738|HPT_HUMAN	R.HYEGSTVPEKK.T	Y	41.49	1273.63	-0.4	425.55	3	13.49	1039	1	312	322
P00738|HPT_HUMAN	K.LRTEGDGVYTLNDKK.Q	Y	40.75	1707.88	2.8	570.302	3	25.65	4643	1	58	72
P00738|HPT_HUMAN	K.SPVGVQPILNEHTFC(+57.02)AGMSK.Y	Y	38.81	2171.05	1	724.691	3	48.29	11277	1	326	345	Carbamidomethylation
P05546|HEP2_HUMAN	R.SVNDLYIQK.Q	Y	65.29	1078.57	1.2	540.291	2	32.26	6606	2	220	228
P05546|HEP2_HUMAN	K.TLEAQLTPR.V	Y	59.77	1027.57	0.2	514.79	2	32.91	6791	2	368	376
P05546|HEP2_HUMAN	K.NYNLVESLK.L	Y	59.38	1078.57	1.2	540.291	2	43.47	9876	2	402	410
P05546|HEP2_HUMAN	K.QFPILLDFK.T	Y	58.04	1119.63	1.1	560.824	2	67.01	16531	2	229	237
P05546|HEP2_HUMAN	K.VREYYFAEAQIADFSDPAFISK.T	Y	56.81	2566.24	1.3	856.421	3	62.89	15383	1	240	261
P05546|HEP2_HUMAN	K.FAFNLYR.V	Y	52.2	929.476	1.9	465.746	2	50.65	11942	2	133	139
P05546|HEP2_HUMAN	R.FTVDRPFLFLIYEHR.T	Y	46.92	1952.03	1	651.685	3	64.4	15804	2	469	483
P05546|HEP2_HUMAN	K.HQGTITVNEEGTQATTVTTVGFM(+15.99)PLSTQVR.F	Y	45.15	3218.59	-0.4	1073.87	3	49.55	11632	1	439	468	Oxidation (M)
P05546|HEP2_HUMAN	R.IAIDLFK.H	Y	32.77	818.49	1.5	410.253	2	53.23	12668	2	432	438
P01765|HV304_HUMAN	EVQLLESGGGLVQPGGSLR.L	N	95.32	1895.01	1	948.514	2	52.05	12335	11	1	19
P01765|HV304_HUMAN	R.AEDTAVYYC(+57.02)AK.G	N	74.91	1289.56	1.4	645.788	2	27.22	5113	2	84	94	Carbamidomethylation
P01765|HV304_HUMAN	R.FTISRDDSK.N	Y	50.88	1067.52	1.2	534.77	2	21.09	3261	3	68	76
P01765|HV304_HUMAN	K.GRFTISR.D	N	40.74	835.466	1.5	418.741	2	22.49	3682	2	66	72
P27918|PROP_HUMAN	R.HC(+57.02)YSIQHC(+57.02)PLK.G	Y	71.89	1441.66	1.7	481.561	3	22.83	3788	2	369	379	Carbamidomethylation
P27918|PROP_HUMAN	K.SISC(+57.02)QEIPGQQSR.G	Y	68.46	1488.7	1.3	745.358	2	27.23	5116	2	334	346	Carbamidomethylation
P27918|PROP_HUMAN	K.GLLGGGVSVEDC(+57.02)C(+57.02)LNTAFAYQK.R	Y	60.65	2358.1	1.8	787.042	3	57.22	13794	3	45	66	Carbamidomethylation
P27918|PROP_HUMAN	K.YPPTVSM(+15.99)VEGQGEK.N	Y	56.54	1536.71	1.7	769.365	2	29.52	5798	1	414	427	Oxidation (M)
P27918|PROP_HUMAN	R.LC(+57.02)TPLLPK.Y	Y	48.78	940.542	2.2	471.279	2	41.53	9306	2	406	413	Carbamidomethylation
P27918|PROP_HUMAN	R.TC(+57.02)NHPVPQHGGPFC(+57.02)AGDATR.T	Y	41.43	2177.95	2.3	545.496	4	24.99	4445	2	283	302	Carbamidomethylation
P27918|PROP_HUMAN	K.RPC(+57.02)LHVPAC(+57.02)KDPEEEEL	Y	33.97	2077.96	-0.5	693.659	3	34.67	7307	2	453	469	Carbamidomethylation
Q9UGM5|FETUB_HUMAN	R.IFFESVYGQC(+57.02)K.A	Y	73.1	1376.64	0.9	689.33	2	49.23	11542	2	108	118	Carbamidomethylation
Q9UGM5|FETUB_HUMAN	R.GSVQYLPDLDDK.N	Y	62.9	1348.65	0.6	675.333	2	44.64	10215	2	302	313
Q9UGM5|FETUB_HUMAN	K.AIFYM(+15.99)NNPSR.V	Y	61.62	1227.57	2.5	614.794	2	31.65	6424	2	119	128	Oxidation (M)
Q9UGM5|FETUB_HUMAN	R.ASSQWVVGPSYFVEYLIK.E	Y	49.66	2072.06	1.2	1037.04	2	79.97	19754	3	195	212
Q9UGM5|FETUB_HUMAN	K.LVVLPFPK.E	Y	49.24	911.584	1.2	456.8	2	54.74	13088	2	353	360
Q9UGM5|FETUB_HUMAN	R.LNRVNDAQEYRR.G	Y	41.39	1532.78	0.5	511.934	3	16.68	1965	4	64	75
Q9UGM5|FETUB_HUMAN	K.QYSLFK.V	Y	33.82	784.412	1.4	393.214	2	38.44	8414	1	186	191
P04220|MUCB_HUMAN	K.LIC(+57.02)QATGFSPR.Q	N	74.81	1248.63	1.2	625.322	2	34.79	7337	2	70	80	Carbamidomethylation
P04220|MUCB_HUMAN	K.YVTSAPM(+15.99)PEPQAPGR.Y	N	74.72	1615.77	-0.2	808.89	2	27.68	5247	3	315	329	Oxidation (M)
P04220|MUCB_HUMAN	K.GVALHRPDVYLLPPAR.E	N	58.36	1773	0.4	592.009	3	44.08	10054	2	261	276
P04220|MUCB_HUMAN	K.YVTSAPMPEPQAPGR.Y	N	58.19	1599.77	-0.9	800.892	2	34.67	7308	1	315	329
P04220|MUCB_HUMAN	R.DGFFGNPR.K	N	53.65	908.414	1	455.215	2	37.96	8274	1	59	66
P04220|MUCB_HUMAN	R.VFAIPPSFASIFLTK.S	N	51.12	1636.92	2.1	819.47	2	78.25	19427	6	162	176
Q7RTS7|K2C74_HUMAN	R.FLEQQNQVLETK.W	N	76.32	1475.76	0.1	738.888	2	36.14	7741	3	160	171
Q7RTS7|K2C74_HUMAN	K.AEAEALYQTK.I	N	67.62	1122.56	1.4	562.286	2	25.58	4620	2	327	336
Q7RTS7|K2C74_HUMAN	K.LLEGEEC(+57.02)R.M	N	60.38	1004.46	1.4	503.238	2	21.37	3346	1	445	452	Carbamidomethylation
Q7RTS7|K2C74_HUMAN	K.FASFIDK.V	N	56.09	826.423	1.3	414.219	2	38.21	8344	2	151	157
Q7RTS7|K2C74_HUMAN	R.KLLEGEEC(+57.02)R.M	N	39.06	1132.55	-0.5	378.525	3	19.16	2704	2	444	452	Carbamidomethylation
Q7RTS7|K2C74_HUMAN	K.SKAEAEALYQTK.I	N	35.17	1337.68	1.4	669.85	2	22.95	3825	1	325	336
P01781|HV320_HUMAN	K.NSLYLQM(+15.99)NSLR.V	Y	71.65	1353.67	1.4	677.844	2	36.99	7988	2	77	87	Oxidation (M)
P01781|HV320_HUMAN	EVQLVESGGDLVQPGR.S	Y	69.31	1681.86	5.5	841.944	2	43	9742	2	1	16
P01781|HV320_HUMAN	K.GLEWVANIK.Z	Y	66.46	1028.57	1.6	515.291	2	50.33	11849	2	44	52
P01781|HV320_HUMAN	R.FTISRDNAK.N	Y	47.06	1050.55	0.6	526.28	2	20.8	3178	4	68	76
P01781|HV320_HUMAN	K.GRFTISR.D	N	40.74	835.466	1.5	418.741	2	22.49	3682	2	66	72
P01781|HV320_HUMAN	R.VEDTALYYC(+57.02)AR.G	Y	37.55	1359.61	1.6	680.815	2	31.15	6279	1	88	98	Carbamidomethylation
P01766|HV305_HUMAN	EVQLVESGGGLVQPGGSLR.L	Y	94.3	1881	1.7	941.507	2	47.02	10908	8	1	19
P01766|HV305_HUMAN	R.AEDTAVYYC(+57.02)AR.S	N	77.07	1317.57	1.3	659.791	2	28.51	5488	4	87	97	Carbamidomethylation
P01766|HV305_HUMAN	K.GRFTISR.N	N	40.74	835.466	1.5	418.741	2	22.49	3682	2	65	71
Q9UHG3|PCYOX_HUMAN	K.IAIIGAGIGGTSAAYYLR.Q	Y	89.36	1765.97	1.7	883.995	2	59.28	14375	3	37	54
Q9UHG3|PCYOX_HUMAN	R.SDFYDIVLVATPLNR.K	Y	62.47	1721.9	0.7	861.957	2	68.76	17023	2	305	319
Q9UHG3|PCYOX_HUMAN	R.EKEDPEPSTDGTYVWK.I	Y	42.43	1879.85	1.6	627.624	3	35.11	7431	2	391	406
Q9UHG3|PCYOX_HUMAN	K.IDLFEREEVGGR.L	Y	29.1	1418.72	0.3	473.913	3	41.21	9215	1	63	74
P01779|HV318_HUMAN	EVQLLESGGGLVQPGGSLR.L	N	95.32	1895.01	1	948.514	2	52.05	12335	11	1	19
P01779|HV318_HUMAN	R.LSC(+57.02)AASGFTFSR.V	Y	72.68	1302.6	-0.2	652.308	2	41.15	9197	2	20	31	Carbamidomethylation
Q7Z794|K2C1B_HUMAN	R.FLEQQNQVLQTK.W	N	77.53	1474.78	0.6	738.397	2	35.12	7435	3	184	195
Q7Z794|K2C1B_HUMAN	K.VRFLEQQNQVLQTK.W	N	70.42	1729.95	0.6	865.982	2	37.5	8138	3	182	195
Q7Z794|K2C1B_HUMAN	K.FASFIDK.V	N	56.09	826.423	1.3	414.219	2	38.21	8344	2	175	181
Q7Z794|K2C1B_HUMAN	K.YEDEINKR.T	N	45.15	1065.51	0.9	533.762	2	15.95	1751	3	254	261
P20742|PZP_HUMAN	R.NQGNTWLTAFVLK.T	N	75.17	1490.79	0.9	746.402	2	67.39	16637	2	1041	1053
P20742|PZP_HUMAN	R.SSGSLLNNAIK.G	N	67.55	1102.6	0.8	552.307	2	36.35	7799	2	1088	1098
P20742|PZP_HUMAN	R.YGAATFTR.T	N	56.13	885.434	0.7	443.725	2	26.17	4795	1	1270	1277
P20742|PZP_HUMAN	K.M(+15.99)VSGFIPLKPTVK.M	N	44.71	1431.82	2.6	478.281	3	43.05	9754	2	1391	1403	Oxidation (M)
P04114|APOB_HUMAN	K.IAELSATAQEIIK.S	Y	71.12	1385.78	0.1	693.896	2	48.49	11332	1	4466	4478
P04114|APOB_HUMAN	R.TGISPLALIK.G	Y	57.46	1011.63	2	506.825	2	55.97	13439	2	220	229
P04114|APOB_HUMAN	K.GNVATEISTER.D	Y	48.43	1175.58	1.7	588.797	2	27.76	5272	1	197	207
P04114|APOB_HUMAN	K.GFEPTLEALFGK.Q	Y	43.51	1307.68	0.4	654.846	2	67.49	16668	1	696	707
P04114|APOB_HUMAN	R.QIDDIDVR.F	Y	43.4	972.488	1.4	487.252	2	30.67	6132	1	4122	4129
P04114|APOB_HUMAN	K.EQHLFLPFSYK.N	Y	37.21	1407.72	1.3	470.247	3	54.85	13120	1	263	273
P49908|SEPP1_HUMAN	R.DM(+15.99)PASEDLQDLQK.K	Y	75.48	1504.67	0.7	753.344	2	33.92	7090	1	262	274	Oxidation (M)
P49908|SEPP1_HUMAN	K.LPTDSELAPR.S	Y	70.98	1097.57	2.6	549.795	2	31.62	6414	2	289	298
P49908|SEPP1_HUMAN	R.DMPASEDLQDLQK.K	Y	53.4	1488.68	-0.5	745.345	2	40.22	8926	1	262	274
P49908|SEPP1_HUMAN	K.RVSLATVDK.T	Y	50.57	987.571	0.8	494.793	2	23.01	3846	2	188	196
P49908|SEPP1_HUMAN	R.VSLATVDK.T	Y	38.4	831.47	1.5	416.743	2	27.19	5104	1	189	196
Q3SY84|K2C71_HUMAN	R.FLEQQNQVLETK.W	N	76.32	1475.76	0.1	738.888	2	36.14	7741	3	150	161
Q3SY84|K2C71_HUMAN	K.AEAEALYQTK.F	N	67.62	1122.56	1.4	562.286	2	25.58	4620	2	317	326
Q3SY84|K2C71_HUMAN	K.FASFIDK.V	N	56.09	826.423	1.3	414.219	2	38.21	8344	2	141	147
Q3SY84|K2C71_HUMAN	K.SKAEAEALYQTK.F	N	35.17	1337.68	1.4	669.85	2	22.95	3825	1	315	326
Q8N1N4|K2C78_HUMAN	R.YLDFSSIITEVR.A	Y	69.16	1441.75	0.9	721.881	2	66.73	16455	3	275	286
Q8N1N4|K2C78_HUMAN	K.AEAEALYQTK.Y	N	67.62	1122.56	1.4	562.286	2	25.58	4620	2	298	307
Q8N1N4|K2C78_HUMAN	R.LLEGEEC(+57.02)R.M	N	60.38	1004.46	1.4	503.238	2	21.37	3346	1	416	423	Carbamidomethylation
Q8N1N4|K2C78_HUMAN	R.FLEQQNK.V	N	38.16	905.461	1.3	453.738	2	18.94	2638	2	131	137
Q8N1N4|K2C78_HUMAN	K.VRFLEQQNK.V	N	35.58	1160.63	0.9	581.323	2	24.87	4410	3	129	137
P51884|LUM_HUMAN	K.SLEYLDLSFNQIAR.L	Y	73.88	1667.85	1.7	834.935	2	63.41	15529	2	185	198
P51884|LUM_HUMAN	R.LPSGLPVSLLTLYLDNNK.I	Y	61.65	1956.09	1.3	979.055	2	78.02	19377	4	199	216
P51884|LUM_HUMAN	R.LKEDAVSAAFK.G	Y	61.08	1177.63	1.2	393.553	3	31.58	6403	2	171	181
P51884|LUM_HUMAN	K.ISNIPDEYFK.R	Y	47	1224.6	0.5	613.309	2	44.18	10083	1	217	226
P61626|LYSC_HUMAN	R.STDYGIFQINSR.Y	Y	82.07	1399.67	0.3	700.844	2	49.52	11620	2	69	80
P61626|LYSC_HUMAN	R.ATNYNAGDR.S	Y	62.46	980.431	1	491.223	2	13.85	1142	2	60	68
P61626|LYSC_HUMAN	K.WESGYNTR.A	Y	41.02	1011.44	0.8	506.728	2	22.66	3740	1	52	59
P0CG06|LAC3_HUMAN	K.YAASSYLSLTPEQWK.S	N	81.03	1742.85	1.7	872.434	2	55.86	13407	2	66	80
P0CG06|LAC3_HUMAN	K.SYSC(+57.02)QVTHEGSTVEK.T	N	62.39	1710.75	1	856.384	2	20.63	3128	1	84	98	Carbamidomethylation
P0CG06|LAC3_HUMAN	K.AGVETTTPSK.Q	Y	62.01	989.503	1.1	495.759	2	15.37	1584	2	51	60
P0CG05|LAC2_HUMAN	K.YAASSYLSLTPEQWK.S	N	81.03	1742.85	1.7	872.434	2	55.86	13407	2	66	80
P0CG05|LAC2_HUMAN	R.SYSC(+57.02)QVTHEGSTVEK.T	N	62.39	1710.75	1	856.384	2	20.63	3128	1	84	98	Carbamidomethylation
P0CG05|LAC2_HUMAN	K.AGVETTTPSK.Q	Y	62.01	989.503	1.1	495.759	2	15.37	1584	2	51	60
P08729|K2C7_HUMAN	K.LALDIEIATYR.K	N	76.2	1276.7	1.7	639.36	2	57.26	13802	3	383	393
P08729|K2C7_HUMAN	K.FASFIDK.V	N	56.09	826.423	1.3	414.219	2	38.21	8344	2	102	108
P08729|K2C7_HUMAN	R.FLEQQNK.L	N	38.16	905.461	1.3	453.738	2	18.94	2638	2	111	117
P08729|K2C7_HUMAN	K.VRFLEQQNK.L	N	35.58	1160.63	0.9	581.323	2	24.87	4410	3	109	117
Q14CN4|K2C72_HUMAN	R.FLEQQNQVLETK.W	N	76.32	1475.76	0.1	738.888	2	36.14	7741	3	145	156
Q14CN4|K2C72_HUMAN	K.DVDAAYM(+15.99)NK.V	N	60.45	1041.44	0.6	521.729	2	18.65	2551	2	235	243	Oxidation (M)
Q14CN4|K2C72_HUMAN	K.DVDAAYMNK.V	N	59.28	1025.45	0.1	513.732	2	25.28	4532	2	235	243
Q14CN4|K2C72_HUMAN	K.FASFIDK.V	N	56.09	826.423	1.3	414.219	2	38.21	8344	2	136	142
Q7Z3Y7|K1C28_HUMAN	K.VTMQNLNDR.L	N	66.72	1089.52	1.5	545.77	2	25.47	4584	2	88	96
Q7Z3Y7|K1C28_HUMAN	K.DAEAWFNEK.S	N	59.99	1108.48	3.2	555.25	2	43.04	9751	2	276	284
Q7Z3Y7|K1C28_HUMAN	K.VTM(+15.99)QNLNDR.L	N	59.84	1105.52	0.9	553.767	2	16.01	1769	6	88	96	Oxidation (M)
Q7Z3Y7|K1C28_HUMAN	R.LAADDFR.L	N	53.15	806.392	1.6	404.204	2	28.58	5507	2	170	176
Q7Z3Y7|K1C28_HUMAN	R.LAADDFRLK.Y	N	34.8	1047.57	1.4	350.198	3	37.02	7999	2	170	178
Q7Z3Y7|K1C28_HUMAN	K.SKGFGSGSPGNSSK.D	Y	30.05	1295.61	0.4	648.813	2	20.91	3213	1	404	417
P08727|K1C19_HUMAN	R.VLDELTLAR.T	N	64.12	1028.59	1.4	515.301	2	43.77	9962	2	189	197
P08727|K1C19_HUMAN	K.LTMQNLNDR.L	N	57.63	1103.54	2.3	552.778	2	29.58	5815	2	82	90
P08727|K1C19_HUMAN	R.LASYLDK.V	N	54.82	808.433	2.5	405.225	2	26.79	4982	2	91	97
P08727|K1C19_HUMAN	R.LAADDFR.T	N	53.15	806.392	1.6	404.204	2	28.58	5507	2	160	166
P01764|HV303_HUMAN	R.AEDTAVYYC(+57.02)AK	N	74.91	1289.56	1.4	645.788	2	27.22	5113	2	107	117	Carbamidomethylation
P01764|HV303_HUMAN	K.NTLYLQMNSLR.A	Y	73.51	1351.69	0.6	676.854	2	48.32	11282	3	96	106
P01764|HV303_HUMAN	K.GRFTISR.D	N	40.74	835.466	1.5	418.741	2	22.49	3682	2	85	91
P06331|HV209_HUMAN	K.LSSVTAADTAVYYC(+57.02)AR.G	N	82.03	1746.82	1.2	874.421	2	40.71	9071	5	102	117	Carbamidomethylation
P06331|HV209_HUMAN	R.VTISLDTSK.N	Y	55.37	962.528	1.6	482.272	2	33.43	6944	3	87	95
P06331|HV209_HUMAN	K.SRVTISLDTSK.N	Y	35.08	1205.66	0.2	402.894	3	29.58	5816	1	85	95
P04040|CATA_HUMAN	K.ADVLTTGAGNPVGDK.L	Y	74.52	1413.71	1.2	707.863	2	32.07	6549	1	24	38
P04040|CATA_HUMAN	R.FNTANDDNVTQVR.A	Y	73.73	1492.69	1.2	747.354	2	27.82	5289	2	432	444
P68871|HBB_HUMAN	K.VNVDEVGGEALGR.L	Y	68.07	1313.66	1.1	657.837	2	37.14	8032	1	19	31
P68871|HBB_HUMAN	K.SAVTALWGK.V	Y	58.09	931.513	1.8	466.764	2	44.25	10104	1	10	18
P68871|HBB_HUMAN	R.FFESFGDLSTPDAVM(+15.99)GNPK.V	Y	50.02	2073.94	2.5	1037.98	2	55.31	13254	1	42	60	Oxidation (M)
P01767|HV306_HUMAN	R.AEDTAVYYC(+57.02)AR.D	N	77.07	1317.57	1.3	659.791	2	28.51	5488	4	87	97	Carbamidomethylation
P01767|HV306_HUMAN	EVQLVETGGGLIQPGGSLR.L	Y	52.8	1909.03	1.4	955.522	2	53.12	12640	1	1	19
P01767|HV306_HUMAN	K.GRFTISR.D	N	40.74	835.466	1.5	418.741	2	22.49	3682	2	65	71
P01763|HV302_HUMAN	R.AEDTAVYYC(+57.02)AR.G	N	77.07	1317.57	1.3	659.791	2	28.51	5488	4	88	98	Carbamidomethylation
P01763|HV302_HUMAN	K.GRFTISR.N	N	40.74	835.466	1.5	418.741	2	22.49	3682	2	66	72
P01763|HV302_HUMAN	QVQLVDSGGGLVEPGGSLR.L	Y	31.45	1866.98	0.4	623.334	3	48.33	11287	6	1	19
P0CF74|LAC6_HUMAN	K.YAASSYLSLTPEQWK.S	N	81.03	1742.85	1.7	872.434	2	55.86	13407	2	66	80
P0CF74|LAC6_HUMAN	R.SYSC(+57.02)QVTHEGSTVEK.T	N	62.39	1710.75	1	856.384	2	20.63	3128	1	84	98	Carbamidomethylation
Q7Z3Y8|K1C27_HUMAN	K.VTMQNLNDR.L	N	66.72	1089.52	1.5	545.77	2	25.47	4584	2	86	94
Q7Z3Y8|K1C27_HUMAN	R.DAEAWFNEK.S	N	59.99	1108.48	3.2	555.25	2	43.04	9751	2	274	282
Q7Z3Y8|K1C27_HUMAN	K.VTM(+15.99)QNLNDR.L	N	59.84	1105.52	0.9	553.767	2	16.01	1769	6	86	94	Oxidation (M)
P14136|GFAP_HUMAN	K.LALDIEIATYR.K	N	76.2	1276.7	1.7	639.36	2	57.26	13802	3	357	367
P14136|GFAP_HUMAN	R.FLEQQNK.A	N	38.16	905.461	1.3	453.738	2	18.94	2638	2	89	95
P14136|GFAP_HUMAN	K.VRFLEQQNK.A	N	35.58	1160.63	0.9	581.323	2	24.87	4410	3	87	95
P06396|GELS_HUMAN	K.AGALNSNDAFVLK.T	Y	71.97	1318.69	0.8	660.352	2	44.3	10117	2	585	597
P06396|GELS_HUMAN	K.QTQVSVLPEGGETPLFK.Q	Y	64.47	1828.96	2.4	915.488	2	53.72	12808	2	374	390
Q2M2I5|K1C24_HUMAN	R.QSVEADINGLR.K	N	65.86	1200.61	1.3	601.313	2	38.35	8386	2	242	252
Q2M2I5|K1C24_HUMAN	R.LAADDFR.L	N	53.15	806.392	1.6	404.204	2	28.58	5507	2	225	231
Q2M2I5|K1C24_HUMAN	R.LAADDFRLK.Y	N	34.8	1047.57	1.4	350.198	3	37.02	7999	2	225	233
P01774|HV313_HUMAN	EVQLLESGGGLVQPGGSLR.L	N	95.32	1895.01	1	948.514	2	52.05	12335	11	1	19
Q7Z3Z0|K1C25_HUMAN	K.VTMQNLNDR.L	N	66.72	1089.52	1.5	545.77	2	25.47	4584	2	81	89
Q7Z3Z0|K1C25_HUMAN	R.DAEAWFNEK.S	N	59.99	1108.48	3.2	555.25	2	43.04	9751	2	269	277
Q7Z3Z0|K1C25_HUMAN	K.VTM(+15.99)QNLNDR.L	N	59.84	1105.52	0.9	553.767	2	16.01	1769	6	81	89	Oxidation (M)
Q96DA0|ZG16B_HUMAN	R.VSVGLLLVK.S	Y	61.14	926.616	2.5	464.317	2	52.95	12591	2	79	87
Q96DA0|ZG16B_HUMAN	K.VFVAFQAFLR.G	Y	50.84	1196.67	-3	599.341	2	67.72	16733	1	122	131
Q96DA0|ZG16B_HUMAN	K.LGALGGNTQEVTLQPGEYITK.V	Y	46.06	2188.14	4.8	730.39	3	50.75	11973	1	101	121
P01825|HV207_HUMAN	R.LSSVTAADTAVYYC(+57.02)AR.N	N	82.03	1746.82	1.2	874.421	2	40.71	9071	5	82	97	Carbamidomethylation
P01825|HV207_HUMAN	K.NQFSLR.L	Y	32.63	763.398	1.2	382.707	2	28.86	5596	2	76	81
P01040|CYTA_HUMAN	K.TQVVAGTNYYIK.V	Y	78.37	1355.71	1.2	678.862	2	36.39	7814	2	45	56
P01040|CYTA_HUMAN	K.TNETYGKLEAVQYK.T	Y	39.73	1642.82	1.2	548.615	3	32.49	6672	1	31	44
P00742|FA10_HUMAN	K.ETYDFDIAVLR.L	Y	62.33	1340.66	0.6	671.338	2	58.05	14029	2	317	327
P00742|FA10_HUMAN	K.TPITFR.M	Y	44.84	733.412	0.1	367.713	2	30.51	6084	2	330	335
P00742|FA10_HUMAN	K.QEDAC(+57.02)QGDSGGPHVTR.F	Y	31.18	1712.72	-0.1	571.913	3	16.06	1787	1	411	426	Carbamidomethylation
Q99456|K1C12_HUMAN	K.YENELALR.Q	N	62.45	1006.51	2.3	504.263	2	33.42	6942	2	218	225
Q99456|K1C12_HUMAN	R.LASYLDK.V	N	54.82	808.433	2.5	405.225	2	26.79	4982	2	136	142
Q02413|DSG1_HUMAN	K.TYVVTGNM(+15.99)GSNDK.V	Y	60.66	1400.62	0.9	701.32	2	20.28	3026	1	391	403	Oxidation (M)
Q02413|DSG1_HUMAN	K.VGDFVATDLDTGRPSTTVR.Y	Y	44.8	2006.01	1	669.677	3	40.99	9149	1	404	422
Q02413|DSG1_HUMAN	K.ASAISVTVLNVIEGPVFRPGSK.T	Y	34.48	2240.25	-1.7	747.757	3	69.04	17099	2	369	390
Q86YZ3|HORN_HUMAN	R.QSLGHGQHGSGSGQSPSPSR.G	Y	49.24	1946.89	-0.3	649.972	3	13.41	1016	1	992	1011
Q86YZ3|HORN_HUMAN	R.GPYESGSGHSSGLGHR.E	Y	48.31	1583.71	-0.4	528.91	3	15.31	1569	4	1038	1053
Q86YZ3|HORN_HUMAN	R.GSGSGQSPSYGR.H	Y	35.15	1138.5	1.4	570.258	2	14.69	1388	1	897	908
Q86YZ3|HORN_HUMAN	R.GSGSGQSPSSGQHGTGFGR.S	Y	34.89	1746.77	0.7	583.263	3	16.63	1952	2	430	448
Q96PD5|PGRP2_HUMAN	R.TDC(+57.02)PGDALFDLLR.T	Y	66.32	1491.7	1.2	746.86	2	70.15	17402	2	528	540	Carbamidomethylation
Q96PD5|PGRP2_HUMAN	R.AGLLRPDYALLGHR.Q	Y	52.2	1550.87	0.1	517.963	3	44.79	10261	1	510	523
Q9Y6R7|FCGBP_HUMAN	R.GNPAVSYVR.V	Y	59.76	961.498	0.2	481.756	2	26.05	4763	2	1725	1733
Q9Y6R7|FCGBP_HUMAN	K.AIGYATAADC(+57.02)GR.T	Y	50.53	1224.56	1.3	613.286	2	26.35	4851	2	423	434	Carbamidomethylation
Q6KB66|K2C80_HUMAN	K.LALDIEIATYR.K	N	76.2	1276.7	1.7	639.36	2	57.26	13802	3	374	384
P36955|PEDF_HUMAN	K.LAAAVSNFGYDLYR.V	Y	49.95	1558.78	1.4	780.397	2	53.12	12641	1	54	67
P36955|PEDF_HUMAN	K.ELLDTVTAPQK.N	Y	48.96	1213.66	1.8	607.836	2	36.95	7979	1	124	134
P36955|PEDF_HUMAN	K.LSYEGEVTK.S	Y	47.77	1024.51	1.3	513.262	2	25.86	4706	1	319	327
P09871|C1S_HUMAN	R.TNFDNDIALVR.L	Y	59.78	1276.64	0.7	639.328	2	45.46	10455	1	524	534
P09871|C1S_HUMAN	R.IIGGSDADIK.N	Y	41.86	987.524	0.5	494.769	2	25.9	4717	1	438	447
P04003|C4BPA_HUMAN	K.LSLEIEQLELQR.D	Y	72.36	1469.81	1.2	735.913	2	56.39	13557	1	574	585
P04003|C4BPA_HUMAN	R.C(+57.02)HPGYKPTTDEPTTVIC(+57.02)QK.N	Y	30.97	2231.04	1.1	558.767	4	27.9	5314	1	332	350	Carbamidomethylation
P12036|NFH_HUMAN	K.LLEGEEC(+57.02)R.I	N	60.38	1004.46	1.4	503.238	2	21.37	3346	1	405	412	Carbamidomethylation
P12036|NFH_HUMAN	R.KLLEGEEC(+57.02)R.I	N	39.06	1132.55	-0.5	378.525	3	19.16	2704	2	404	412	Carbamidomethylation
P10909|CLUS_HUMAN	R.ASSIIDELFQDR.F	Y	57.87	1392.69	2.3	697.353	2	65.24	16037	2	183	194
P10909|CLUS_HUMAN	K.TLLSNLEEAK.K	Y	45.5	1116.6	1.3	559.309	2	46.52	10764	1	69	78
P04180|LCAT_HUMAN	K.TYSVEYLDSSK.L	Y	46.18	1290.6	1.9	646.307	2	36.87	7956	1	130	140
P04180|LCAT_HUMAN	R.TYIYDHGFPYTDPVGVLYEDGDDTVATR.S	Y	40.91	3178.44	1.4	1060.49	3	62.1	15163	1	348	375
P04180|LCAT_HUMAN	R.ITTTSPWM(+15.99)FPSR.M	Y	35.28	1438.69	1.8	720.354	2	48.64	11371	1	269	280	Oxidation (M)
P04083|ANXA1_HUMAN	K.GLGTDEDTLIEILASR.T	Y	65.57	1701.88	1.6	851.948	2	70.02	17369	2	129	144
P04083|ANXA1_HUMAN	R.ALYEAGER.R	Y	32.79	907.44	4.1	454.729	2	22.11	3568	1	205	212
P12955|PEPD_HUMAN	K.VPLALFALNR.Q	Y	65.6	1112.67	0.5	557.343	2	60.63	14751	2	18	27
P01743|HV102_HUMAN	R.SEDTAVYYC(+57.02)AR	Y	77.32	1333.56	1.2	667.788	2	28.31	5431	3	107	117	Carbamidomethylation
Q7Z3Y9|K1C26_HUMAN	K.VTMQNLNDR.L	N	66.72	1089.52	1.5	545.77	2	25.47	4584	2	85	93
Q7Z3Y9|K1C26_HUMAN	K.VTM(+15.99)QNLNDR.L	N	59.84	1105.52	0.9	553.767	2	16.01	1769	6	85	93	Oxidation (M)
P03952|KLKB1_HUMAN	R.IAYGTQGSSGYSLR.L	Y	73.4	1458.71	1.2	730.363	2	33.52	6970	1	360	373
Q9UK55|ZPI_HUMAN	R.IFSPFADLSELSATGR.N	Y	72.68	1709.86	-0.7	855.938	2	68.39	16920	2	360	375
P25705|ATPA_HUMAN	R.EAYPGDVFYLHSR.L	Y	61.61	1552.73	2.3	777.375	2	45.66	10513	4	335	347
P01780|HV319_HUMAN	DVQLVESGGGLVKPGGSLR.L	Y	61.92	1867.02	0.4	623.346	3	43.64	9927	2	1	19
P23083|HV103_HUMAN	R.QAPGQGLEWM(+15.99)GR.I	Y	68.77	1344.62	2.1	673.321	2	35.29	7484	2	58	69	Oxidation (M)
P23083|HV103_HUMAN	R.QAPGQGLEWMGR.I	Y	59.9	1328.63	1	665.323	2	44.16	10074	2	58	69
P62987|RL40_HUMAN	K.TITLEVEPSDTIENVK.A	Y	68.03	1786.92	1.4	894.468	2	48.83	11427	2	12	27
P62979|RS27A_HUMAN	K.TITLEVEPSDTIENVK.A	Y	68.03	1786.92	1.4	894.468	2	48.83	11427	2	12	27
P0CG47|UBB_HUMAN	K.TITLEVEPSDTIENVK.A	Y	68.03	1786.92	1.4	894.468	2	48.83	11427	2	12	27
P0CG48|UBC_HUMAN	K.TITLEVEPSDTIENVK.A	Y	68.03	1786.92	1.4	894.468	2	48.83	11427	2	12	27
P02760|AMBP_HUMAN	R.AFIQLWAFDAVK.G	Y	66.66	1407.76	1.7	704.886	2	71.03	17648	2	298	309
Q6UWP8|SBSN_HUMAN	K.FGQGAHHAAGQAGNEAGR.F	Y	65.42	1734.79	1.8	579.273	3	14.01	1188	1	242	259
Q5D862|FILA2_HUMAN	R.SVVTVIDVFYK.Y	Y	62.34	1268.7	1.1	635.359	2	63.32	15503	2	7	17
P31151|S10A7_HUMAN	K.GTNYLADVFEK.K	Y	62.25	1255.61	0.9	628.812	2	54.22	12947	1	51	61
P05783|K1C18_HUMAN	R.LAADDFR.V	N	53.15	806.392	1.6	404.204	2	28.58	5507	2	159	165
P78386|KRT85_HUMAN	R.FLEQQNK.L	N	38.16	905.461	1.3	453.738	2	18.94	2638	2	143	149
P78386|KRT85_HUMAN	K.VRFLEQQNK.L	N	35.58	1160.63	0.9	581.323	2	24.87	4410	3	141	149
P20848|A1ATR_HUMAN	K.VVNPTQK	N	47.31	784.444	0.4	393.23	2	14.58	1354	2	414	420
O43866|CD5L_HUMAN	R.ELGC(+57.02)GAASGTPSGILYEPPAEK.E	Y	58.12	2203.05	1.9	735.357	3	45.46	10458	1	64	85	Carbamidomethylation
P06744|G6PI_HUMAN	R.FAAYFQQGDMESNGK.Y	Y	57.49	1691.72	2.7	846.872	2	40.79	9094	2	348	362
P06744|G6PI_HUMAN	R.FAAYFQQGDM(+15.99)ESNGK.Y	Y	50.3	1707.72	1	854.868	2	36.1	7728	2	348	362	Oxidation (M)
P12273|PIP_HUMAN	R.FYTIEILKVE	Y	57.39	1253.69	-0.6	627.852	2	61.17	14901	2	137	146
P63261|ACTG_HUMAN	R.GYSFTTTAER.E	Y	57.13	1131.52	1.3	566.768	2	30.66	6130	1	197	206
P60709|ACTB_HUMAN	R.GYSFTTTAER.E	Y	57.13	1131.52	1.3	566.768	2	30.66	6130	1	197	206
P19827|ITIH1_HUMAN	R.EVAFDLEIPK.T	Y	38.11	1159.61	0.9	580.814	2	54.86	13123	1	84	93
P19827|ITIH1_HUMAN	K.GSLVQASEANLQAAQDFVR.G	Y	37.12	2003.01	-0.1	668.676	3	58.41	14131	1	342	360
P08670|VIME_HUMAN	R.FLEQQNK.I	N	38.16	905.461	1.3	453.738	2	18.94	2638	2	123	129
P08670|VIME_HUMAN	K.VRFLEQQNK.I	N	35.58	1160.63	0.9	581.323	2	24.87	4410	3	121	129
Q9NZT1|CALL5_HUMAN	K.AFSAVDTDGNGTINAQELGAALK.A	Y	55.5	2262.11	1.8	755.046	3	53.81	12832	1	16	38
P81605|DCD_HUMAN	K.ENAGEDPGLAR.Q	Y	54.78	1127.52	0.5	564.768	2	20.01	2945	2	43	53
P04080|CYTB_HUMAN	K.SQVVAGTNYFIK.V	Y	53.68	1325.7	0.9	663.857	2	43.21	9804	1	45	56
Q5VST9|OBSCN_HUMAN	R.FIEDVK.N	N	40.64	749.396	1.8	375.706	2	29.26	5717	2	3540	3545
O76013|KRT36_HUMAN	K.LAADDFR.T	N	53.15	806.392	1.6	404.204	2	28.58	5507	2	173	179
P01591|IGJ_HUMAN	R.SSEDPNEDIVER.N	Y	52.38	1388.61	1.4	695.311	2	25.82	4690	2	47	58
P01771|HV310_HUMAN	K.GRFTISR.D	N	40.74	835.466	1.5	418.741	2	22.49	3682	2	66	72
P35858|ALS_HUMAN	R.VAGLLEDTFPGLLGLR.V	Y	50.51	1669.94	0.9	835.978	2	75.48	18811	1	278	293
P02788|TRFL_HUMAN	R.YYGYTGAFR.C	Y	50	1096.5	2	549.257	2	38.36	8389	1	544	552
P01824|HV206_HUMAN	R.NQFSLNLR.S	Y	48.2	990.525	4.5	496.272	2	42.97	9732	2	78	85
O14556|G3PT_HUMAN	K.LTGM(+15.99)AFR.V	Y	39.71	810.406	1	406.211	2	23.26	3920	2	300	306	Oxidation (M)
Q96KN2|CNDP1_HUMAN	R.ALEQDLPVNIK.F	Y	46.08	1238.69	0.2	620.351	2	44.74	10248	1	182	192
P02649|APOE_HUMAN	R.LGPLVEQGR.V	Y	43.68	967.545	1.2	484.78	2	30.53	6092	2	199	207
P49454|CENPF_HUMAN	K.LALSPLSLGK.E	Y	43.47	997.617	1.3	499.817	2	60.2	14636	1	3116	3125
P15924|DESP_HUMAN	K.GFFDPNTEENLTYLQLK.E	Y	29.95	2027.98	2.9	1015	2	63.22	15478	1	2414	2430
P40926|MDHM_HUMAN	K.IFGVTTLDIVR.A	Y	41.88	1232.71	1.1	617.364	2	63.85	15650	2	166	176
P01762|HV301_HUMAN	K.GRFTISR.D	N	40.74	835.466	1.5	418.741	2	22.49	3682	2	66	72
P01769|HV308_HUMAN	K.GRFTISR.B	N	40.74	835.466	1.5	418.741	2	22.49	3682	2	66	72
Q12805|FBLN3_HUMAN	R.ADQVC(+57.02)INLR.G	Y	39.37	1087.54	0.9	544.78	2	35.74	7620	1	186	194	Carbamidomethylation
P20930|FILA_HUMAN	R.HSGIGHGQASSAVR.D	Y	38.6	1362.68	-0.6	455.232	3	13.79	1124	1	2019	2032
Q5TZA2|CROCC_HUMAN	R.QLQKAVAESEEAR.R	Y	29.01	1457.75	2.4	729.883	2	34	7115	1	1555	1567
Q8TD26|CHD6_HUMAN	K.DVITISISK.D	Y	34.93	974.565	1.4	488.29	2	44.37	10135	2	1733	1741
Q99250|SCN2A_HUMAN	R.ESLAAIEQR.I	Y	33.33	1015.53	1.4	508.773	2	29.21	5704	1	20	28
P32189|GLPK_HUMAN	R.WLLDNVR.K	Y	32.54	914.497	0.4	458.256	2	43.36	9848	2	156	162
Q9NWH9|SLTM_HUMAN	K.LSLDTDAR.F	Y	32.04	889.451	0.9	445.733	2	19.73	2865	1	747	754
P80419|HV322_HUMAN	R.VEDTATYYC(+57.02)AR.V	Y	31.93	1347.58	1.2	674.796	2	31.93	6510	1	86	96	Carbamidomethylation
Q8IWZ3|ANKH1_HUMAN	K.LLDEGR.S	Y	31.79	701.371	0.1	351.693	2	19.16	2702	2	224	229
Q8IVL0|NAV3_HUMAN	R.LPGPSRVPAAGSSSK.V	Y	31.1	1409.76	2.3	470.929	3	42.65	9640	2	248	262
O94804|STK10_HUMAN	K.SDPPTLLTPSK.W	Y	30.85	1154.62	0.9	578.317	2	33.7	7022	2	252	262
A6NJ16|IV4F8_HUMAN	K.NQFSLK.L	Y	30.71	735.391	0.7	368.703	2	27.5	5192	2	96	101
Q9UPR0|PLCL2_HUMAN	R.SVIDIINK.Y	Y	30.6	900.528	0.4	451.272	2	37.86	8243	1	498	505
P06733|ENOA_HUMAN	K.YNQLLR.I	Y	30.56	805.445	1.3	403.73	2	26.45	4878	2	407	412
Q68DL7|CR063_HUMAN	R.LPAPELK.E	Y	28.83	766.459	1	384.237	2	29.3	5731	1	163	169
Q9Y6W3|CAN7_HUMAN	R.INSPHYLTK.I	Y	28.82	1071.57	1.2	536.794	2	25.75	4669	2	633	641
Q8TDY2|RBCC1_HUMAN	K.FLEQLEEQEKR.K	Y	28.77	1447.73	0.7	724.873	2	37.8	8227	1	1302	1312
Q96I13|ABHD8_HUMAN	R.LAPGSAGSGSGSGSGGRR.R	Y	28.5	1516.73	1.7	506.586	3	54.55	13037	1	131	148
A6NIK2|LR10B_HUMAN	R.ALPAELPR.M	Y	28.48	865.502	1.2	433.759	2	24.79	4385	1	150	157
P31327|CPSM_HUMAN	K.LFAEAVQK.S	Y	28.46	904.502	1.1	453.259	2	40.17	8910	2	1472	1479
Q8TF62|AT8B4_HUMAN	K.IWVLTGDK.Q	Y	28.33	930.518	0.9	466.266	2	48.26	11268	2	670	677
P17174|AATC_HUMAN	K.NFGLYNER.V	Y	28.32	1011.48	0.6	506.746	2	35.72	7612	1	260	267
P14923|PLAK_HUMAN	R.ALPELTK.L	Y	28.04	770.454	1.2	386.235	2	27.36	5151	2	143	149
Q96NZ8|WFKN1_HUMAN	R.DGVAVLDAGSYVR.A	Y	27.95	1320.67	1.9	661.342	2	42.57	9614	2	509	521
Q08378|GOGA3_HUMAN	R.LDSELK.E	N	27.94	703.375	-0.7	352.695	2	19.01	2659	1	876	881
Q7Z6J4|FGD2_HUMAN	R.IDVAGM(+15.99)KVR.E	Y	27.93	1003.55	-1	502.781	2	43.79	9969	1	368	376	Oxidation (M)
P98160|PGBM_HUMAN	K.C(+57.02)LIHDGAAPISLEWK.T	Y	27.4	1708.86	0.7	855.438	2	61.98	15128	2	3043	3057	Carbamidomethylation
P33981|TTK_HUMAN	K.QIGSGGSSK.V	Y	27.38	819.409	0.5	410.712	2	21.11	3270	1	530	538
Q8TDW7|FAT3_HUMAN	K.LYGNNGVSSTAK.L	Y	27	1209.6	-0.1	605.807	2	25.08	4473	1	240	251
Q8TEL6|TP4AP_HUMAN	MAAAPVAAGSGAGR.G	Y	26.6	1185.59	1.9	593.805	2	25.86	4705	1	1	14
Q7Z5N4|SDK1_HUMAN	K.YNGAVLTESVSLK.E	Y	26.6	1379.73	1	690.873	2	39.93	8843	1	2105	2117
HC2
P35908|K22E_HUMAN	K.SISISVAGGGGGFGAAGGFGGR.G	Y	133.42	1837.91	1.5	919.962	2	51.17	12340	5	71	92
P35908|K22E_HUMAN	R.HGGGGGGFGGGGFGSR.S	Y	119.97	1319.58	0.7	660.795	2	24.79	4655	4	46	61
P35908|K22E_HUMAN	R.TSQNSELNNMQDLVEDYK.K	Y	115.76	2126.94	1.5	1064.48	2	53.44	12980	4	248	265
P35908|K22E_HUMAN	R.TSQNSELNNM(+15.99)QDLVEDYK.K	Y	106.9	2142.94	1.8	1072.48	2	37.72	8469	4	248	265	Oxidation (M)
P35908|K22E_HUMAN	R.GGSGGGGSISGGGYGSGGGSGGR.Y	Y	103.57	1740.74	1.5	871.379	2	17.8	2583	2	550	572
P35908|K22E_HUMAN	R.GGGFGGGSSFGGGSGFSGGGFGGGGFGGGR.F	Y	102.28	2398.01	1.6	800.346	3	52.6	12745	4	93	122
P35908|K22E_HUMAN	K.VDLLNQEIEFLK.V	Y	98.84	1459.79	1.2	730.904	2	64.11	15971	3	303	314
P35908|K22E_HUMAN	K.GGSISGGGYGSGGGK.H	Y	98.59	1196.54	1.2	599.279	2	16.01	2051	2	581	595
P35908|K22E_HUMAN	R.GFSSGSAVVSGGSR.R	Y	97.97	1253.6	0.9	627.808	2	25.11	4749	2	21	34
P35908|K22E_HUMAN	R.GGSSSGGGYGSGGGGSSSVK.G	Y	91.72	1587.68	0.7	794.846	2	13.63	1358	2	604	623
P35908|K22E_HUMAN	K.NVQDAIADAEQR.G	Y	89.8	1328.63	1	665.324	2	35.03	7683	2	419	430
P35908|K22E_HUMAN	R.FLEQQNQVLQTK.W	N	89.73	1474.78	1.9	738.398	2	34.81	7616	4	198	209
P35908|K22E_HUMAN	K.YEELQVTVGR.H	Y	88.56	1192.61	0.9	597.312	2	36.89	8222	2	375	384
P35908|K22E_HUMAN	R.NLDLDSIIAEVK.A	N	88.26	1328.72	1.1	665.367	2	65.31	16307	2	342	353
P35908|K22E_HUMAN	R.SKEEAEALYHSK.Y	Y	87.45	1390.67	0.9	696.344	2	17.88	2606	4	363	374
P35908|K22E_HUMAN	R.M(+15.99)SGDLSSNVTVSVTSSTISSNVASK.A	Y	84.95	2473.19	0.8	825.403	3	44	10290	2	491	515	Oxidation (M)
P35908|K22E_HUMAN	K.LALDVEIATYR.K	N	83.24	1262.69	1	632.351	2	52.22	12637	2	471	481
P35908|K22E_HUMAN	R.NKLNDLEEALQQAK.E	Y	81.12	1612.84	-0.1	807.428	2	48.55	11598	4	440	453
P35908|K22E_HUMAN	R.YLDGLTAER.T	Y	80.02	1036.52	1.3	519.267	2	35.23	7740	2	239	247
P35908|K22E_HUMAN	R.TAAENDFVTLK.K	Y	79.92	1207.61	2.2	604.813	2	38.56	8706	2	276	286
P35908|K22E_HUMAN	K.DVDNAYMIK.V	Y	77.74	1067.5	1.7	534.756	2	34.68	7578	2	288	296
P35908|K22E_HUMAN	K.DVDNAYM(+15.99)IK.V	Y	77.6	1083.49	0	542.753	2	28.61	5789	3	288	296	Oxidation (M)
P35908|K22E_HUMAN	K.VLYDAEISQIHQSVTDTNVILSM(+15.99)DNSR.N	Y	77.26	3063.48	1.8	1022.17	3	56.25	13767	6	315	341	Oxidation (M)
P35908|K22E_HUMAN	K.VRFLEQQNQVLQTK.W	N	76.66	1729.95	1	865.982	2	37.26	8332	3	196	209
P35908|K22E_HUMAN	R.TAAENDFVTLKK.D	Y	76.47	1335.7	0.5	668.859	2	31.01	6501	4	276	287
P35908|K22E_HUMAN	K.AQYEEIAQR.S	N	75.93	1106.54	2.1	554.276	2	23.53	4284	2	354	362
P35908|K22E_HUMAN	K.VLYDAEISQIHQSVTDTNVILSMDNSR.N	Y	75.61	3047.49	0.7	1016.84	3	60.52	14969	2	315	341
P35908|K22E_HUMAN	K.LLEGEEC(+57.02)R.M	N	75.41	1004.46	2.2	503.238	2	20.69	3435	2	483	490	Carbamidomethylation
P35908|K22E_HUMAN	K.EIKIEISELNR.V	Y	74.33	1342.75	0.5	672.38	2	43.42	10122	3	391	401
P35908|K22E_HUMAN	R.TSQNSELNNMQDLVEDYKK.K	Y	73.61	2255.04	1	752.687	3	48.02	11451	2	248	266
P35908|K22E_HUMAN	R.GSSSGGGYSSGSSSYGSGGR.Q	Y	73.54	1739.7	1.5	870.858	2	16.31	2138	2	525	544
P35908|K22E_HUMAN	R.RSTSSFSC(+57.02)LSR.H	Y	72.72	1286.6	0.3	644.309	2	24.16	4471	2	35	45	Carbamidomethylation
P35908|K22E_HUMAN	K.RYLDGLTAER.T	Y	71.9	1192.62	2.2	597.319	2	31.73	6712	2	238	247
P35908|K22E_HUMAN	R.LLRDYQELMNVK.L	N	71.45	1520.8	1.7	507.942	3	44.94	10564	3	459	470
P35908|K22E_HUMAN	R.LQGEIAHVK.K	Y	71.41	993.561	0.5	497.788	2	19.72	3142	2	406	414
P35908|K22E_HUMAN	K.KYEDEINKR.T	N	69.85	1193.6	1.4	597.81	2	14.58	1638	5	267	275
P35908|K22E_HUMAN	R.SKEEAEALYHSKYEELQVTVGR.H	Y	66.95	2565.27	1.3	642.326	4	39.96	9115	2	363	384
P35908|K22E_HUMAN	R.SLVGLGGTK.S	Y	66.58	830.486	1.3	416.251	2	30.74	6422	1	62	70
P35908|K22E_HUMAN	K.KDVDNAYM(+15.99)IK.V	Y	66.56	1211.59	0.3	606.8	2	21.79	3767	2	287	296	Oxidation (M)
P35908|K22E_HUMAN	K.LNDLEEALQQAKEDLAR.L	Y	66.13	1955	1.2	652.673	3	63.14	15700	2	442	458
P35908|K22E_HUMAN	R.LLRDYQELM(+15.99)NVK.L	N	65.51	1536.8	1.9	513.274	3	35.65	7866	2	459	470	Oxidation (M)
P35908|K22E_HUMAN	R.DYQELM(+15.99)NVK.L	N	64.31	1154.53	2.2	578.272	2	29.1	5936	2	462	470	Oxidation (M)
P35908|K22E_HUMAN	K.AAFGGSGGR.G	Y	62.98	778.372	0.1	390.193	2	14.46	1601	2	516	524
P35908|K22E_HUMAN	K.VDPEIQNVK.A	Y	62.45	1040.55	1.1	521.283	2	25.07	4736	2	167	175
P35908|K22E_HUMAN	K.RTAAENDFVTLK.K	Y	61.04	1363.71	1.5	455.578	3	33.84	7331	2	275	286
P35908|K22E_HUMAN	K.FASFIDK.V	N	60.4	826.423	1.3	414.219	2	37.83	8497	2	189	195
P35908|K22E_HUMAN	K.IEISELNR.V	N	57.58	972.524	1.7	487.27	2	34.52	7529	2	394	401
P35908|K22E_HUMAN	R.KLLEGEEC(+57.02)R.M	N	56.41	1132.55	1.1	567.285	2	18.51	2792	3	482	490	Carbamidomethylation
P35908|K22E_HUMAN	K.YEDEINK.R	N	55.46	909.408	0.8	455.712	2	17.18	2396	2	268	274
P35908|K22E_HUMAN	R.GFSSGSAVVSGGSRR.S	Y	53.49	1409.7	2.1	705.859	2	21.83	3778	2	21	35
P35908|K22E_HUMAN	R.TSQNSELNNM(+15.99)QDLVEDYKK.K	Y	52.92	2271.03	0.7	758.019	3	33.04	7094	2	248	266	Oxidation (M)
P35908|K22E_HUMAN	K.KKYEDEINKR.T	N	50.77	1321.7	-0.2	441.574	3	13	1174	2	266	275
P35908|K22E_HUMAN	R.LQGEIAHVKK.Q	Y	49.51	1121.66	0.3	561.835	2	15.45	1890	3	406	415
P35908|K22E_HUMAN	K.LALDVEIATYRK.L	N	49.39	1390.78	1.6	464.602	3	45.37	10686	2	471	482
P35908|K22E_HUMAN	K.NVQDAIADAEQRGEHALK.D	Y	48.64	1963.97	1.2	655.665	3	45.58	10743	3	419	436
P35908|K22E_HUMAN	K.YEDEINKR.T	N	47.43	1065.51	1.3	356.177	3	15	1756	3	268	275
P35908|K22E_HUMAN	R.FGGFGGPGGVGGLGGPGGFGPGGYPGGIHEVSVNQSLLQPLNVK.V	Y	41.66	4091.07	0.2	1023.77	4	67.83	17014	4	123	166
P35908|K22E_HUMAN	K.HSSGGGSRGGSSSGGGYGSGGGGSSSVK.G	Y	40.75	2313	0.6	579.257	4	11.93	882	3	596	623
P35908|K22E_HUMAN	K.IEISELNRVIQR.L	N	37.7	1468.84	0.9	490.62	3	45.87	10829	2	394	405
P02768|ALBU_HUMAN	K.VFDEFKPLVEEPQNLIK.Q	Y	122.43	2044.09	1.4	1023.05	2	59.55	14700	14	397	413
P02768|ALBU_HUMAN	K.EFNAETFTFHADIC(+57.02)TLSEK.E	Y	107.91	2259.02	2.7	1130.52	2	56.47	13830	14	525	543	Carbamidomethylation
P02768|ALBU_HUMAN	K.VPQVSTPTLVEVSR.N	Y	99.47	1510.84	1.4	756.426	2	43.9	10259	7	439	452
P02768|ALBU_HUMAN	K.QNC(+57.02)ELFEQLGEYK.F	Y	98.8	1656.75	2.3	829.382	2	51.76	12506	8	414	426	Carbamidomethylation
P02768|ALBU_HUMAN	K.SHC(+57.02)IAEVENDEM(+15.99)PADLPSLAADFVESK.D	Y	95.87	2989.33	1.7	997.453	3	62.02	15386	13	311	337	Carbamidomethylation; Oxidation (M)
P02768|ALBU_HUMAN	K.AVMDDFAAFVEK.C	Y	94.56	1341.63	1.1	671.822	2	59.83	14774	5	570	581
P02768|ALBU_HUMAN	K.DVFLGM(+15.99)FLYEYAR.R	Y	94.53	1638.78	0.3	820.395	2	71.85	18124	8	348	360	Oxidation (M)
P02768|ALBU_HUMAN	R.LVRPEVDVMC(+57.02)TAFHDNEETFLK.K	Y	93.98	2649.26	1.6	884.094	3	55.33	13514	6	139	160	Carbamidomethylation
P02768|ALBU_HUMAN	K.YIC(+57.02)ENQDSISSK.L	Y	93.95	1442.63	2.1	722.326	2	22.02	3839	12	287	298	Carbamidomethylation
P02768|ALBU_HUMAN	K.AVM(+15.99)DDFAAFVEK.C	Y	93.83	1357.62	2.1	679.82	2	50.57	12170	17	570	581	Oxidation (M)
P02768|ALBU_HUMAN	K.SHC(+57.02)IAEVENDEMPADLPSLAADFVESK.D	Y	93.45	2973.34	2.1	992.122	3	67.2	16836	4	311	337	Carbamidomethylation
P02768|ALBU_HUMAN	K.TC(+57.02)VADESAENC(+57.02)DK.S	Y	93.29	1497.57	0.7	749.793	2	15.51	1906	4	76	88	Carbamidomethylation
P02768|ALBU_HUMAN	K.KVPQVSTPTLVEVSR.N	Y	92.5	1638.93	0.9	820.473	2	40.02	9130	14	438	452
P02768|ALBU_HUMAN	K.LVNEVTEFAK.T	Y	90.28	1148.61	0.7	575.312	2	39.01	8838	4	66	75
P02768|ALBU_HUMAN	R.LVRPEVDVMC(+57.02)TAFHDNEETFLKK.Y	Y	86.12	2777.35	3	926.794	3	51.48	12428	7	139	161	Carbamidomethylation
P02768|ALBU_HUMAN	R.RPC(+57.02)FSALEVDETYVPK.E	Y	85.77	1909.92	0.4	637.649	3	47.04	11170	8	509	524	Carbamidomethylation
P02768|ALBU_HUMAN	R.RHPDYSVVLLLR.L	Y	85.02	1466.84	1.7	734.426	2	48.44	11563	10	361	372
P02768|ALBU_HUMAN	R.LVRPEVDVM(+15.99)C(+57.02)TAFHDNEETFLK.K	Y	83.85	2665.25	0.4	889.425	3	47.31	11247	14	139	160	Oxidation (M); Carbamidomethylation
P02768|ALBU_HUMAN	R.LVRPEVDVM(+15.99)C(+57.02)TAFHDNEETFLKK.Y	Y	83.02	2793.35	1.5	932.124	3	43.54	10158	7	139	161	Oxidation (M); Carbamidomethylation
P02768|ALBU_HUMAN	K.LC(+57.02)TVATLRETYGEM(+15.99)ADC(+57.02)C(+57.02)AK.Q	Y	82.14	2364.02	2.3	789.016	3	37.91	8524	2	98	117	Carbamidomethylation; Oxidation (M)
P02768|ALBU_HUMAN	R.HPYFYAPELLFFAK.R	Y	82.14	1741.89	1.3	581.637	3	70.23	17680	4	170	183
P02768|ALBU_HUMAN	K.C(+57.02)C(+57.02)AAADPHEC(+57.02)YAK.V	Y	82.02	1551.59	1.4	776.804	2	16.44	2179	4	384	396	Carbamidomethylation
P02768|ALBU_HUMAN	K.LC(+57.02)TVATLRETYGEMADC(+57.02)C(+57.02)AK.Q	Y	81.61	2348.03	1.3	783.684	3	46.68	11063	2	98	117	Carbamidomethylation
P02768|ALBU_HUMAN	R.MPC(+57.02)AEDYLSVVLNQLC(+57.02)VLHEK.T	Y	81.09	2517.21	1.3	840.077	3	78.77	19776	2	470	490	Carbamidomethylation
P02768|ALBU_HUMAN	K.ADDKETC(+57.02)FAEEGKK.L	Y	80.84	1626.72	1.6	814.368	2	16.51	2199	7	585	598	Carbamidomethylation
P02768|ALBU_HUMAN	R.RHPYFYAPELLFFAK.R	Y	80.01	1897.99	1	950.002	2	64.44	16064	10	169	183
P02768|ALBU_HUMAN	K.VHTEC(+57.02)C(+57.02)HGDLLEC(+57.02)ADDR.A	Y	79.78	2085.83	2.4	696.286	3	27.63	5496	4	265	281	Carbamidomethylation
P02768|ALBU_HUMAN	K.C(+57.02)C(+57.02)TESLVNR.R	Y	79.78	1137.49	0.8	569.753	2	22.44	3959	2	500	508	Carbamidomethylation
P02768|ALBU_HUMAN	R.M(+15.99)PC(+57.02)AEDYLSVVLNQLC(+57.02)VLHEK.T	Y	79.62	2533.2	1.6	845.409	3	75.92	19173	2	470	490	Oxidation (M); Carbamidomethylation
P02768|ALBU_HUMAN	R.HPDYSVVLLLR.L	Y	78.98	1310.73	0.7	656.375	2	53.63	13031	5	362	372
P02768|ALBU_HUMAN	K.ADDKETC(+57.02)FAEEGK.K	Y	77.79	1498.62	0.8	500.549	3	19.86	3182	4	585	597	Carbamidomethylation
P02768|ALBU_HUMAN	R.ETYGEMADC(+57.02)C(+57.02)AK.Q	Y	77.24	1433.53	1.2	717.771	2	25.29	4803	2	106	117	Carbamidomethylation
P02768|ALBU_HUMAN	K.DDNPNLPR.L	Y	76.1	939.441	1	470.728	2	21.32	3623	4	131	138
P02768|ALBU_HUMAN	K.SLHTLFGDK.L	Y	75.14	1016.53	1.7	509.273	2	35.72	7886	2	89	97
P02768|ALBU_HUMAN	K.VHTEC(+57.02)C(+57.02)HGDLLEC(+57.02)ADDRADLAK.Y	Y	75.1	2584.11	2	862.379	3	33.32	7175	9	265	286	Carbamidomethylation
P02768|ALBU_HUMAN	K.DVFLGMFLYEYAR.R	Y	74.04	1622.78	2.1	812.399	2	78.47	19720	2	348	360
P02768|ALBU_HUMAN	K.LVAASQAALGL	Y	72.98	1012.59	1.2	507.304	2	49.68	11920	4	599	609
P02768|ALBU_HUMAN	K.RM(+15.99)PC(+57.02)AEDYLSVVLNQLC(+57.02)VLHEK.T	Y	72.2	2689.3	0.3	897.442	3	72.3	18250	6	469	490	Oxidation (M); Carbamidomethylation
P02768|ALBU_HUMAN	K.KQTALVELVK.H	Y	71.4	1127.69	1.2	564.854	2	35.86	7928	5	549	558
P02768|ALBU_HUMAN	K.AAFTEC(+57.02)C(+57.02)QAADK.A	Y	71.26	1370.56	2.3	686.289	2	22.52	3987	6	187	198	Carbamidomethylation
P02768|ALBU_HUMAN	K.LDELRDEGK.A	Y	69.39	1073.54	1.8	537.776	2	17.71	2553	4	206	214
P02768|ALBU_HUMAN	R.ETYGEM(+15.99)ADC(+57.02)C(+57.02)AK.Q	Y	69.17	1449.52	1.9	725.769	2	17.36	2447	5	106	117	Oxidation (M); Carbamidomethylation
P02768|ALBU_HUMAN	K.DLGEENFK.A	Y	67.82	950.434	2	476.226	2	28.88	5873	2	37	44
P02768|ALBU_HUMAN	K.QEPERNEC(+57.02)FLQHKDDNPNLPR.L	Y	67.5	2635.22	2.1	879.416	3	29.34	6009	9	118	138	Carbamidomethylation
P02768|ALBU_HUMAN	K.ETC(+57.02)FAEEGKK.L	Y	67.31	1197.53	0.9	599.775	2	15.58	1926	5	589	598	Carbamidomethylation
P02768|ALBU_HUMAN	K.KYLYEIAR.R	Y	65.81	1054.58	2.2	528.299	2	32.95	7067	4	161	168
P02768|ALBU_HUMAN	K.EC(+57.02)C(+57.02)EKPLLEK.S	Y	65.22	1304.61	1.9	653.314	2	21.75	3756	4	301	310	Carbamidomethylation
P02768|ALBU_HUMAN	K.YLYEIAR.R	Y	64.47	926.486	0.7	464.251	2	36.96	8246	2	162	168
P02768|ALBU_HUMAN	K.ALVLIAFAQYLQQC(+57.02)PFEDHVK.L	Y	63.51	2489.28	-2.6	830.764	3	78.43	19711	5	45	65	Carbamidomethylation
P02768|ALBU_HUMAN	K.KLVAASQAALGL	Y	62.71	1140.69	1.4	571.351	2	44.21	10351	2	598	609
P02768|ALBU_HUMAN	K.QTALVELVK.H	Y	62.27	999.596	1	500.806	2	43.02	10007	2	550	558
P02768|ALBU_HUMAN	K.TYETTLEK.C	Y	61.59	983.481	2.1	492.749	2	22.58	4001	4	376	383
P02768|ALBU_HUMAN	K.AEFAEVSK.L	Y	60.34	879.434	0	440.724	2	23.22	4190	2	250	257
P02768|ALBU_HUMAN	R.HPYFYAPELLFFAKR.Y	Y	59.36	1897.99	1.4	633.671	3	64.22	16003	1	170	184
P02768|ALBU_HUMAN	K.TPVSDRVTK.C	Y	57.85	1001.55	0.6	501.783	2	14.49	1607	2	491	499
P02768|ALBU_HUMAN	K.ETC(+57.02)FAEEGK.K	Y	56.83	1069.44	1.8	535.727	2	19.5	3077	2	589	597	Carbamidomethylation
P02768|ALBU_HUMAN	K.LC(+57.02)TVATLR.E	Y	56.5	932.511	0.7	467.263	2	30.52	6353	2	98	105	Carbamidomethylation
P02768|ALBU_HUMAN	K.QEPERNEC(+57.02)FLQHK.D	Y	56.34	1713.79	-0.7	857.901	2	22.12	3870	5	118	130	Carbamidomethylation
P02768|ALBU_HUMAN	K.FQNALLVR.Y	Y	56.24	959.555	0.9	480.785	2	39.35	8936	4	427	434
P02768|ALBU_HUMAN	K.AAC(+57.02)LLPK.L	Y	56.14	771.431	1.7	386.724	2	28.78	5844	2	199	205	Carbamidomethylation
P02768|ALBU_HUMAN	K.C(+57.02)C(+57.02)TESLVNRRPC(+57.02)FSALEVDETYVPK.E	Y	55.9	3029.4	1.5	758.36	4	49.28	11803	4	500	524	Carbamidomethylation
P02768|ALBU_HUMAN	K.AEFAEVSKLVTDLTK.V	Y	55.54	1649.89	1.4	550.971	3	62.63	15556	2	250	264
P02768|ALBU_HUMAN	K.LVTDLTK.V	Y	55.44	788.464	1.1	395.24	2	26.69	5219	4	258	264
P02768|ALBU_HUMAN	R.FKDLGEENFK.A	Y	54.07	1225.6	1.6	409.541	3	31.6	6676	3	35	44
P02768|ALBU_HUMAN	K.LDELRDEGKASSAK.Q	Y	50.21	1517.77	2.1	506.931	3	16.46	2185	1	206	219
P02768|ALBU_HUMAN	R.LSQRFPK.A	Y	46.03	874.502	0.7	438.259	2	18.78	2868	2	243	249
P02768|ALBU_HUMAN	R.RHPYFYAPELLFFAKR.Y	Y	45.75	2054.09	2.9	514.531	4	59.18	14593	2	169	184
P02768|ALBU_HUMAN	R.NEC(+57.02)FLQHK.D	Y	45.73	1074.49	1	538.254	2	21.96	3818	4	123	130	Carbamidomethylation
P02768|ALBU_HUMAN	K.YLYEIARR.H	Y	43.02	1082.59	0.4	542.301	2	31.24	6571	4	162	169
P02768|ALBU_HUMAN	K.KYLYEIARR.H	Y	30.5	1210.68	0.4	404.568	3	27.81	5550	3	161	169
P02768|ALBU_HUMAN	K.AAC(+57.02)LLPKLDELRDEGK.A	Y	27.82	1826.96	0.8	457.747	4	45.04	10593	2	199	214	Carbamidomethylation
P01009|A1AT_HUMAN	K.LYHSEAFTVNFGDTEEAK.K	Y	133.51	2056.94	3	1029.48	2	45.66	10766	22	161	178
P01009|A1AT_HUMAN	K.VFSNGADLSGVTEEAPLK.L	Y	116.34	1832.92	1.5	917.466	2	46.16	10910	8	335	352
P01009|A1AT_HUMAN	K.KLYHSEAFTVNFGDTEEAK.K	Y	112.47	2185.03	3.6	1093.53	2	41.48	9558	18	160	178
P01009|A1AT_HUMAN	K.LQHLENELTHDIITK.F	Y	107.75	1802.95	-0.1	902.484	2	40.74	9341	42	284	298
P01009|A1AT_HUMAN	R.TLNQPDSQLQLTTGNGLFLSEGLK.L	Y	107.14	2573.33	2.1	1287.68	2	61.64	15278	16	126	149
P01009|A1AT_HUMAN	K.DTEEEDFHVDQVTTVK.V	Y	106.28	1890.85	1.7	946.433	2	37.69	8459	22	226	241
P01009|A1AT_HUMAN	K.ITPNLAEFAFSLYR.Q	Y	104.1	1640.86	1.6	821.437	2	73.33	18514	25	50	63
P01009|A1AT_HUMAN	K.GTEAAGAM(+15.99)FLEAIPM(+15.99)SIPPEVK.F	Y	103.04	2290.12	2.3	1146.07	2	62.99	15657	33	368	389	Oxidation (M)
P01009|A1AT_HUMAN	K.FNKPFVFLMIEQNTK.S	Y	99.25	1854.97	1.3	928.494	2	63.36	15762	8	390	404
P01009|A1AT_HUMAN	K.GTEAAGAMFLEAIPMSIPPEVK.F	Y	97.92	2258.13	0.5	1130.07	2	72.49	18300	16	368	389
P01009|A1AT_HUMAN	K.GTEAAGAM(+15.99)FLEAIPMSIPPEVK.F	Y	96.92	2274.13	2.8	1138.07	2	68.77	17273	13	368	389	Oxidation (M)
P01009|A1AT_HUMAN	K.KLYHSEAFTVNFGDTEEAKK.Q	Y	94.93	2313.13	1.5	772.051	3	37.9	8520	12	160	179
P01009|A1AT_HUMAN	K.TDTSHHDQDHPTFNK.I	Y	91.23	1778.76	0.3	890.388	2	13.99	1462	10	35	49
P01009|A1AT_HUMAN	K.GTEAAGAMFLEAIPM(+15.99)SIPPEVK.F	Y	90.68	2274.13	1.1	1138.07	2	67.57	16938	17	368	389	Oxidation (M)
P01009|A1AT_HUMAN	K.GKWERPFEVKDTEEEDFHVDQVTTVK.V	Y	90.07	3147.51	1.9	1050.18	3	42.81	9949	54	216	241
P01009|A1AT_HUMAN	K.ELDRDTVFALVNYIFFK.G	Y	88.68	2089.09	1.1	697.371	3	88.2	21053	5	199	215
P01009|A1AT_HUMAN	K.FNKPFVFLM(+15.99)IEQNTK.S	Y	87.76	1870.97	0.4	936.49	2	55.8	13643	17	390	404	Oxidation (M)
P01009|A1AT_HUMAN	K.SVLGQLGITK.V	Y	81.32	1014.61	0.5	508.311	2	46.89	11121	6	325	334
P01009|A1AT_HUMAN	K.WERPFEVKDTEEEDFHVDQVTTVK.V	Y	79.2	2962.4	2.9	988.476	3	45.45	10709	6	218	241
P01009|A1AT_HUMAN	K.LSITGTYDLK.S	Y	78.6	1109.6	-0.1	555.806	2	42.3	9797	23	315	324
P01009|A1AT_HUMAN	R.LGM(+15.99)FNIQHC(+57.02)K.K	Y	77.43	1262.59	1	632.303	2	28.85	5866	12	248	257	Oxidation (M); Carbamidomethylation
P01009|A1AT_HUMAN	K.LSSWVLLMK.Y	Y	76.96	1075.61	1.8	538.813	2	59.98	14817	2	259	267
P01009|A1AT_HUMAN	K.RLGMFNIQHC(+57.02)K.K	Y	76.52	1402.7	0.4	468.573	3	32.6	6966	6	247	257	Carbamidomethylation
P01009|A1AT_HUMAN	K.LSSWVLLM(+15.99)K.Y	Y	73.15	1091.6	1.3	546.81	2	51.39	12401	13	259	267	Oxidation (M)
P01009|A1AT_HUMAN	K.KLSSWVLLMK.Y	Y	70.86	1203.7	1.4	602.861	2	53.84	13094	4	258	267
P01009|A1AT_HUMAN	K.KLSSWVLLM(+15.99)K.Y	Y	68.94	1219.7	1.8	610.858	2	46.1	10894	9	258	267	Oxidation (M)
P01009|A1AT_HUMAN	K.GKWERPFEVK.D	Y	67.79	1274.68	0.7	638.346	2	30.59	6378	4	216	225
P01009|A1AT_HUMAN	K.AVLTIDEK.G	Y	67.51	887.496	0.9	444.756	2	30.52	6354	2	360	367
P01009|A1AT_HUMAN	R.LGMFNIQHC(+57.02)K.K	Y	65.73	1246.6	0.8	416.539	3	37.76	8477	2	248	257	Carbamidomethylation
P01009|A1AT_HUMAN	K.KQINDYVEK.G	Y	65.15	1135.59	1.1	568.802	2	20.57	3397	4	179	187
P01009|A1AT_HUMAN	K.SPLFM(+15.99)GK.V	Y	62.12	794.4	2.6	398.208	2	30.1	6228	14	405	411	Oxidation (M)
P01009|A1AT_HUMAN	K.LYHSEAFTVNFGDTEEAKK.Q	Y	60.6	2185.03	1.9	729.353	3	43.7	10203	26	161	179
P01009|A1AT_HUMAN	K.RLGM(+15.99)FNIQHC(+57.02)K.K	Y	60.43	1418.69	1.4	473.905	3	27.19	5369	16	247	257	Oxidation (M); Carbamidomethylation
P01009|A1AT_HUMAN	R.SASLHLPK.L	Y	59.9	851.486	1.1	426.751	2	26.12	5051	2	307	314
P01009|A1AT_HUMAN	K.VFSNGADLSGVTEEAPLKLSK.A	Y	59.77	2161.13	0.4	721.383	3	48.61	11614	2	335	355
P01009|A1AT_HUMAN	R.DTVFALVNYIFFK.G	Y	59.38	1575.83	1.7	788.925	2	90.36	21320	1	203	215
P01009|A1AT_HUMAN	K.RLGM(+15.99)FNIQHC(+57.02)KK.L	Y	56.28	1546.79	1.3	516.603	3	21.48	3670	4	247	258	Oxidation (M); Carbamidomethylation
P01009|A1AT_HUMAN	R.LGM(+15.99)FNIQHC(+57.02)KK.L	Y	55.56	1390.68	0.2	696.35	2	23.87	4385	9	248	258	Oxidation (M); Carbamidomethylation
P01009|A1AT_HUMAN	K.FLENEDR.R	Y	55.11	921.419	1.5	461.718	2	21.53	3686	2	299	305
P01009|A1AT_HUMAN	K.QINDYVEK.G	Y	54.33	1007.49	1.6	504.754	2	23.73	4342	5	180	187
P01009|A1AT_HUMAN	K.SPLFMGK.V	Y	51.51	778.405	6.9	390.212	2	35.44	7802	2	405	411
P01009|A1AT_HUMAN	K.VVNPTQK	N	51.45	784.444	1	393.23	2	13.5	1319	2	412	418
P01009|A1AT_HUMAN	K.WERPFEVK.D	Y	50.27	1089.56	0.8	545.788	2	35.04	7684	5	218	225
P01009|A1AT_HUMAN	K.FLEDVKK.L	Y	50.01	877.491	1.8	439.753	2	22.58	4002	2	154	160
P01009|A1AT_HUMAN	K.GTQGKIVDLVK.E	Y	48.19	1156.68	0	579.348	2	31.9	6765	1	188	198
P01009|A1AT_HUMAN	K.LVDKFLEDVK.K	Y	45.63	1204.67	1.1	402.565	3	41.96	9697	1	150	159
P01009|A1AT_HUMAN	K.FLENEDRR.S	Y	42.73	1077.52	0.1	539.768	2	18.27	2721	11	299	306
P01009|A1AT_HUMAN	K.FLEDVK.K	N	41.89	749.396	1.3	375.706	2	28.81	5849	3	154	159
P01009|A1AT_HUMAN	K.LSITGTYDLKSVLGQLGITK.V	Y	41.32	2106.19	2.8	703.074	3	70.02	17622	1	315	334
P01009|A1AT_HUMAN	R.LGMFNIQHC(+57.02)KK.L	Y	28.91	1374.69	1	459.238	3	31.65	6690	1	248	258	Carbamidomethylation
P02787|TRFE_HUMAN	K.IM(+15.99)NGEADAM(+15.99)SLDGGFVYIAGK.C	Y	132.65	2190	2.9	1096.01	2	52.25	12647	4	400	420	Oxidation (M)
P02787|TRFE_HUMAN	K.IM(+15.99)NGEADAMSLDGGFVYIAGK.C	Y	126.59	2174	2.4	1088.01	2	58.15	14305	2	400	420	Oxidation (M)
P02787|TRFE_HUMAN	K.IMNGEADAM(+15.99)SLDGGFVYIAGK.C	Y	123.69	2174	2.2	1088.01	2	55.22	13483	2	400	420	Oxidation (M)
P02787|TRFE_HUMAN	K.IEC(+57.02)VSAETTEDC(+57.02)IAK.I	Y	105.96	1724.76	1.5	863.388	2	32.41	6913	2	385	399	Carbamidomethylation
P02787|TRFE_HUMAN	R.FDEFFSEGC(+57.02)APGSK.K	Y	105.16	1576.65	1.8	789.334	2	45.44	10707	2	495	508	Carbamidomethylation
P02787|TRFE_HUMAN	K.LC(+57.02)M(+15.99)GSGLNLC(+57.02)EPNNK.E	Y	104.95	1721.75	0.3	861.884	2	33.88	7343	2	516	530	Carbamidomethylation; Oxidation (M)
P02787|TRFE_HUMAN	K.LC(+57.02)MGSGLNLC(+57.02)EPNNK.E	Y	104.06	1705.76	0.7	853.887	2	43.12	10038	2	516	530	Carbamidomethylation
P02787|TRFE_HUMAN	K.C(+57.02)STSSLLEAC(+57.02)TFR.R	Y	103.92	1530.68	1.5	766.349	2	45.44	10705	2	684	696	Carbamidomethylation
P02787|TRFE_HUMAN	R.SAGWNIPIGLLYC(+57.02)DLPEPR.K	Y	100.44	2170.09	2.3	1086.05	2	74.96	18927	5	144	162	Carbamidomethylation
P02787|TRFE_HUMAN	K.MYLGYEYVTAIR.N	Y	99.47	1477.73	2.5	739.873	2	55.13	13459	2	332	343
P02787|TRFE_HUMAN	K.EDPQTFYYAVAVVK.K	Y	93.25	1628.81	1.6	815.413	2	55.19	13474	3	108	121
P02787|TRFE_HUMAN	K.M(+15.99)YLGYEYVTAIR.N	Y	93.12	1493.72	2.3	747.87	2	50.58	12175	2	332	343	Oxidation (M)
P02787|TRFE_HUMAN	K.IMNGEADAMSLDGGFVYIAGK.C	Y	93.05	2158.01	2.6	1080.01	2	60.79	15044	2	400	420
P02787|TRFE_HUMAN	R.FDEFFSEGC(+57.02)APGSKK.D	Y	92.44	1704.75	0.8	853.381	2	40.33	9224	4	495	509	Carbamidomethylation
P02787|TRFE_HUMAN	K.DYELLC(+57.02)LDGTR.K	Y	92.36	1353.62	0.6	677.819	2	52.14	12615	2	577	587	Carbamidomethylation
P02787|TRFE_HUMAN	R.TAGWNIPM(+15.99)GLLYNK.I	Y	91.48	1592.8	0.8	797.409	2	57.38	14083	2	476	489	Oxidation (M)
P02787|TRFE_HUMAN	K.HSTIFENLANK.A	Y	88.96	1272.65	0.4	637.331	2	36.96	8244	3	226	236
P02787|TRFE_HUMAN	K.EGYYGYTGAFR.C	Y	88.88	1282.56	1.8	642.289	2	41.24	9489	2	531	541
P02787|TRFE_HUMAN	K.SVIPSDGPSVAC(+57.02)VK.K	Y	87.5	1414.71	1.4	708.365	2	37.03	8265	2	47	60	Carbamidomethylation
P02787|TRFE_HUMAN	K.C(+57.02)DEWSVNSVGKIEC(+57.02)VSAETTEDC(+57.02)IAK.I	Y	86.8	2986.3	1.6	996.442	3	51.44	12419	1	374	399	Carbamidomethylation
P02787|TRFE_HUMAN	R.WC(+57.02)AVSEHEATK.C	Y	85.45	1316.58	1.9	659.299	2	21.2	3588	4	27	37	Carbamidomethylation
P02787|TRFE_HUMAN	R.TAGWNIPMGLLYNK.I	Y	84.77	1576.81	1.6	789.412	2	65.33	16313	2	476	489
P02787|TRFE_HUMAN	K.DSGFQMNQLR.G	Y	84.07	1194.55	2.4	598.281	2	38.34	8644	2	123	132
P02787|TRFE_HUMAN	K.EFQLFSSPHGK.D	Y	82.73	1275.62	0.7	638.82	2	41.97	9702	4	300	310
P02787|TRFE_HUMAN	K.DGAGDVAFVK.H	Y	81.8	977.482	1.4	489.749	2	32.81	7027	2	216	225
P02787|TRFE_HUMAN	R.NLREGTC(+57.02)PEAPTDEC(+57.02)KPVK.W	Y	81.44	2200.03	2.1	734.351	3	22.38	3944	4	344	362	Carbamidomethylation
P02787|TRFE_HUMAN	K.ADRDQYELLC(+57.02)LDNTR.K	Y	80.82	1880.87	1.9	941.443	2	44.96	10568	3	237	251	Carbamidomethylation
P02787|TRFE_HUMAN	R.KPVEEYANC(+57.02)HLAR.A	Y	79.88	1585.77	1.5	529.597	3	22.55	3998	4	588	600	Carbamidomethylation
P02787|TRFE_HUMAN	K.SASDLTWDNLK.G	Y	79.65	1248.6	1.6	625.308	2	44.19	10345	2	454	464
P02787|TRFE_HUMAN	R.EGTC(+57.02)PEAPTDEC(+57.02)KPVK.W	Y	77.56	1816.8	1.6	909.407	2	20.22	3294	4	347	362	Carbamidomethylation
P02787|TRFE_HUMAN	K.HQTVPQNTGGKNPDPWAK.N	Y	76.01	1973.97	1.2	658.998	3	24.74	4642	4	554	571
P02787|TRFE_HUMAN	K.HQTVPQNTGGK.N	Y	73.68	1165.58	0	583.799	2	11.67	830	2	554	564
P02787|TRFE_HUMAN	K.DLLFRDDTVC(+57.02)LAK.L	Y	71.9	1564.79	2.2	783.405	2	50.13	12046	4	647	659	Carbamidomethylation
P02787|TRFE_HUMAN	K.DSGFQM(+15.99)NQLR.G	Y	68.97	1210.54	1	606.278	2	25.99	5014	2	123	132	Oxidation (M)
P02787|TRFE_HUMAN	K.DC(+57.02)HLAQVPSHTVVAR.S	Y	67.61	1688.84	1.2	563.955	3	27.9	5576	3	259	273	Carbamidomethylation
P02787|TRFE_HUMAN	K.YLGEEYVK.A	Y	65.12	999.491	2.1	500.754	2	35.3	7760	2	669	676
P02787|TRFE_HUMAN	K.ASYLDC(+57.02)IR.A	Y	64.01	996.47	1.1	499.243	2	37.47	8395	2	62	69	Carbamidomethylation
P02787|TRFE_HUMAN	K.DSAHGFLK.V	Y	63.46	873.434	0.5	437.725	2	23.65	4317	2	316	323
P02787|TRFE_HUMAN	R.APNHAVVTR.K	Y	62.91	963.525	0.4	482.77	2	12.84	1129	2	601	609
P02787|TRFE_HUMAN	K.INHC(+57.02)RFDEFFSEGC(+57.02)APGSK.K	Y	62.43	2256.97	5.6	753.334	3	42.77	9939	2	490	508	Carbamidomethylation
P02787|TRFE_HUMAN	K.KSASDLTWDNLK.G	Y	59.48	1376.69	2	689.356	2	38.58	8716	4	453	464
P02787|TRFE_HUMAN	K.KASYLDC(+57.02)IR.A	Y	58.28	1124.56	1.3	563.29	2	30.73	6419	2	61	69	Carbamidomethylation
P02787|TRFE_HUMAN	R.LKC(+57.02)DEWSVNSVGK.I	Y	57.46	1520.73	2	507.918	3	33.17	7133	2	372	384	Carbamidomethylation
P02787|TRFE_HUMAN	K.ADRDQYELLC(+57.02)LDNTRKPVDEYK.D	Y	57.44	2740.31	1.2	686.086	4	41.23	9484	4	237	258	Carbamidomethylation
P02787|TRFE_HUMAN	K.WC(+57.02)ALSHHER.L	Y	56.48	1194.54	0.7	598.275	2	17.88	2607	4	363	371	Carbamidomethylation
P02787|TRFE_HUMAN	K.DYELLC(+57.02)LDGTRKPVEEYANC(+57.02)HLAR.A	Y	52.16	2921.38	0.5	731.353	4	47.55	11316	3	577	600	Carbamidomethylation
P02787|TRFE_HUMAN	K.INHC(+57.02)RFDEFFSEGC(+57.02)APGSKK.D	Y	48.33	2385.06	-1.2	597.272	4	39.29	8919	2	490	509	Carbamidomethylation
P02787|TRFE_HUMAN	K.SVIPSDGPSVAC(+57.02)VKK.A	Y	36.25	1542.81	1.6	515.277	3	31.66	6692	2	47	61	Carbamidomethylation
P02787|TRFE_HUMAN	K.KDSGFQM(+15.99)NQLR.G	Y	32.55	1338.63	0.5	670.325	2	20.85	3485	1	122	132	Oxidation (M)
P02787|TRFE_HUMAN	K.EDPQTFYYAVAVVKK.D	Y	30.01	1756.9	1.3	586.643	3	48.74	11649	2	108	122
P02774|VTDB_HUMAN	K.SYLSMVGSC(+57.02)C(+57.02)TSASPTVC(+57.02)FLK.E	Y	131.32	2354.04	1.4	1178.03	2	57.98	14253	4	181	201	Carbamidomethylation
P02774|VTDB_HUMAN	K.SYLSM(+15.99)VGSC(+57.02)C(+57.02)TSASPTVC(+57.02)FLK.E	Y	115.05	2370.04	4.5	1186.03	2	53.11	12888	4	181	201	Oxidation (M); Carbamidomethylation
P02774|VTDB_HUMAN	K.GQELC(+57.02)ADYSENTFTEYKK.K	Y	112.01	2181.95	3.1	1091.99	2	38.21	8610	3	403	420	Carbamidomethylation
P02774|VTDB_HUMAN	K.GQELC(+57.02)ADYSENTFTEYK.K	Y	111.61	2053.86	1.9	1027.94	2	43.03	10011	4	403	419	Carbamidomethylation
P02774|VTDB_HUMAN	K.EVVSLTEAC(+57.02)C(+57.02)AEGADPDC(+57.02)YDTR.T	Y	110.88	2517.01	1.9	1259.51	2	41.9	9680	4	66	87	Carbamidomethylation
P02774|VTDB_HUMAN	K.HLSLLTTLSNR.V	Y	107.3	1253.71	0.9	627.862	2	44.26	10364	4	208	218
P02774|VTDB_HUMAN	K.SLGEC(+57.02)C(+57.02)DVEDSTTC(+57.02)FNAK.G	Y	106.55	2091.82	2.5	1046.92	2	36.24	8035	2	371	388	Carbamidomethylation
P02774|VTDB_HUMAN	K.HQPQEFPTYVEPTNDEIC(+57.02)EAFR.K	Y	103.94	2706.2	1.6	903.076	3	52.8	12800	3	128	149	Carbamidomethylation
P02774|VTDB_HUMAN	K.SC(+57.02)ESNSPFPVHPGTAEC(+57.02)C(+57.02)TK.E	Y	99.72	2263.93	2.1	1132.97	2	32.53	6949	4	95	114	Carbamidomethylation
P02774|VTDB_HUMAN	K.RSDFASNC(+57.02)C(+57.02)SINSPPLYC(+57.02)DSEIDAELK.N	Y	98.86	3147.36	1	1050.13	3	50.07	12032	3	445	471	Carbamidomethylation
P02774|VTDB_HUMAN	K.FPSGTFEQVSQLVK.E	Y	93.19	1565.81	1.2	783.913	2	55.67	13608	2	52	65
P02774|VTDB_HUMAN	R.KFPSGTFEQVSQLVK.E	Y	91.5	1693.9	1.4	847.96	2	51.91	12550	11	51	65
P02774|VTDB_HUMAN	R.RTHLPEVFLSK.V	Y	80.99	1325.75	1.2	663.881	2	37.47	8392	4	353	363
P02774|VTDB_HUMAN	R.VC(+57.02)SQYAAYGEK.K	Y	79.56	1274.56	1.1	638.288	2	23.09	4154	2	219	229	Carbamidomethylation
P02774|VTDB_HUMAN	R.VC(+57.02)SQYAAYGEKK.S	Y	79.55	1402.65	0.5	468.559	3	19.36	3035	2	219	230	Carbamidomethylation
P02774|VTDB_HUMAN	K.TAM(+15.99)DVFVC(+57.02)TYFM(+15.99)PAAQLPELPDVELPTNK.D	Y	78.33	3328.57	2.1	1110.53	3	72.23	18229	5	304	332	Oxidation (M); Carbamidomethylation
P02774|VTDB_HUMAN	R.SDFASNC(+57.02)C(+57.02)SINSPPLYC(+57.02)DSEIDAELK.N	Y	78.23	2991.26	2.1	998.095	3	53.9	13113	2	446	471	Carbamidomethylation
P02774|VTDB_HUMAN	K.EDFTSLSLVLYSR.K	Y	78.22	1528.78	0.9	510.6	3	63.44	15783	3	38	50
P02774|VTDB_HUMAN	R.THLPEVFLSK.V	Y	75.08	1169.64	4.7	585.832	2	42.66	9903	2	354	363
P02774|VTDB_HUMAN	K.C(+57.02)C(+57.02)ESASEDC(+57.02)MAK.E	Y	73.98	1446.49	1	724.252	2	16	2050	2	265	276	Carbamidomethylation
P02774|VTDB_HUMAN	K.ELSSFIDKGQELC(+57.02)ADYSENTFTEYK.K	Y	73.68	2973.32	1.2	992.116	3	55.76	13635	1	395	419	Carbamidomethylation
P02774|VTDB_HUMAN	K.NSKFEDC(+57.02)C(+57.02)QEK.T	Y	72.33	1443.58	1.4	722.796	2	14.16	1514	5	293	303	Carbamidomethylation
P02774|VTDB_HUMAN	K.C(+57.02)C(+57.02)ESASEDC(+57.02)M(+15.99)AK.E	Y	72.21	1462.48	0.2	732.249	2	12.29	974	3	265	276	Carbamidomethylation; Oxidation (M)
P02774|VTDB_HUMAN	K.HQPQEFPTYVEPTNDEIC(+57.02)EAFRK.D	Y	72.16	2834.3	1.7	945.774	3	48.73	11647	4	128	150	Carbamidomethylation
P02774|VTDB_HUMAN	K.DVC(+57.02)DPGNTK.V	Y	69.73	1004.42	0.9	503.219	2	13.84	1419	2	333	341	Carbamidomethylation
P02774|VTDB_HUMAN	K.LC(+57.02)DNLSTK.N	Y	66.09	949.454	1.6	475.735	2	20.69	3434	2	285	292	Carbamidomethylation
P02774|VTDB_HUMAN	K.HLSLLTTLSNRVC(+57.02)SQYAAYGEK.K	Y	65.95	2510.26	2	628.573	4	53.19	12908	4	208	229	Carbamidomethylation
P02774|VTDB_HUMAN	K.YTFELSR.R	Y	61.94	914.45	1.5	458.233	2	39.13	8873	2	346	352
P02774|VTDB_HUMAN	K.LAQKVPTADLEDVLPLAEDITNILSK.C	Y	61.85	2805.54	4	936.19	3	85.47	20727	3	239	264
P02774|VTDB_HUMAN	K.VPTADLEDVLPLAEDITNILSK.C	Y	60.25	2365.26	1.9	1183.64	2	91.21	21417	4	243	264
P02774|VTDB_HUMAN	K.EYANQFM(+15.99)WEYSTNYGQAPLSLLVSYTK.S	Y	58.79	3218.49	3.8	1073.84	3	74.75	18873	3	154	180	Oxidation (M)
P02774|VTDB_HUMAN	K.VM(+15.99)DKYTFELSR.R	Y	57.95	1403.68	2	468.9	3	36.47	8102	2	342	352	Oxidation (M)
P02774|VTDB_HUMAN	K.KELSSFIDK.G	Y	56.1	1065.57	1.5	533.793	2	31.37	6608	4	394	402
P02774|VTDB_HUMAN	K.AKLPDATPK.E	Y	55.84	939.539	2.2	470.778	2	18.13	2678	2	428	436
P02774|VTDB_HUMAN	R.KLC(+57.02)MAALK.H	Y	51.4	933.514	0.9	467.765	2	28.33	5703	2	120	127	Carbamidomethylation
P02774|VTDB_HUMAN	K.LC(+57.02)MAALK.H	Y	49.52	805.419	0.9	403.717	2	33.74	7300	2	121	127	Carbamidomethylation
P02774|VTDB_HUMAN	K.ELPEHTVK.L	Y	48.47	951.503	1	476.759	2	15.86	2007	2	277	284
P02774|VTDB_HUMAN	K.EFSHLGK.E	Y	48.42	816.413	1.5	409.214	2	18.15	2686	2	31	37
P02774|VTDB_HUMAN	K.ELSSFIDK.G	Y	48.19	937.476	0.9	469.745	2	37.4	8374	2	395	402
P02774|VTDB_HUMAN	K.LC(+57.02)M(+15.99)AALK.H	Y	47.25	821.414	0.7	411.714	2	20.07	3246	4	121	127	Carbamidomethylation; Oxidation (M)
P02774|VTDB_HUMAN	K.VLEPTLK.S	Y	46.05	798.485	1.5	400.25	2	29.6	6080	2	364	370
P02774|VTDB_HUMAN	R.KLC(+57.02)M(+15.99)AALK.H	Y	44.71	949.509	0.7	475.762	2	17.08	2365	2	120	127	Carbamidomethylation; Oxidation (M)
P02774|VTDB_HUMAN	K.EFSHLGKEDFTSLSLVLYSR.K	Y	44.34	2327.18	1.7	582.803	4	59.54	14694	2	31	50
P02774|VTDB_HUMAN	K.FEDC(+57.02)C(+57.02)QEK.T	Y	40.51	1114.41	0.9	558.211	2	14.43	1592	2	296	303	Carbamidomethylation
P02774|VTDB_HUMAN	K.SRLSNLIK.L	Y	37.39	929.566	1.6	465.791	2	29.96	6186	2	231	238
P02774|VTDB_HUMAN	K.TAM(+15.99)DVFVC(+57.02)TYFMPAAQLPELPDVELPTNK.D	Y	36.13	3312.58	0.4	1105.2	3	76.32	19274	1	304	332	Oxidation (M); Carbamidomethylation
P02774|VTDB_HUMAN	K.YTFELSRR.T	Y	32.63	1070.55	-0.3	536.283	2	33.03	7092	4	346	353
P02774|VTDB_HUMAN	K.HQPQEFPTYVEPTNDEIC(+57.02)EAFRKDPK.E	Y	31.69	3174.47	1.7	794.626	4	46.64	11052	2	128	153	Carbamidomethylation
P02774|VTDB_HUMAN	K.ERLQLK.H	Y	29.64	785.476	1	393.746	2	18.48	2783	2	202	207
P13645|K1C10_HUMAN	K.NQILNLTTDNANILLQIDNAR.L	Y	123.17	2366.26	1.1	1184.14	2	66.9	16750	17	208	228
P13645|K1C10_HUMAN	K.GSLGGGFSSGGFSGGSFSR.G	Y	121.3	1706.76	0.3	854.39	2	45.73	10789	4	41	59
P13645|K1C10_HUMAN	K.ELTTEIDNNIEQISSYK.S	Y	117.7	1995.96	0.5	998.99	2	54.52	13287	6	346	362
P13645|K1C10_HUMAN	R.GSSGGGC(+57.02)FGGSSGGYGGLGGFGGGSFR.G	Y	115.78	2341.98	1.8	1172	2	50.96	12282	4	60	86	Carbamidomethylation
P13645|K1C10_HUMAN	R.SGGGGGGGGC(+57.02)GGGGGVSSLR.I	Y	107.02	1548.67	1.4	775.343	2	20.35	3330	3	16	35	Carbamidomethylation
P13645|K1C10_HUMAN	R.NVQALEIELQSQLALK.Q	Y	104.05	1796	1.8	899.011	2	64.64	16118	6	371	386
P13645|K1C10_HUMAN	R.AETEC(+57.02)QNTEYQQLLDIK.I	Y	103.78	2081.96	1.9	1041.99	2	50.5	12151	4	423	439	Carbamidomethylation
P13645|K1C10_HUMAN	R.NVSTGDVNVEM(+15.99)NAAPGVDLTQLLNNMR.S	Y	102.72	2887.38	2	963.469	3	68.99	17336	4	296	322	Oxidation (M)
P13645|K1C10_HUMAN	R.SLLEGEGSSGGGGR.G	Y	102.24	1261.59	0.9	631.803	2	24.71	4631	2	451	464
P13645|K1C10_HUMAN	R.SQYEQLAEQNR.K	Y	99.16	1364.63	2	683.325	2	24.96	4706	2	323	333
P13645|K1C10_HUMAN	R.ALEESNYELEGK.I	Y	98.94	1380.64	1	691.328	2	31.09	6521	3	166	177
P13645|K1C10_HUMAN	K.VRALEESNYELEGK.I	Y	98.28	1635.81	0.4	818.913	2	31.44	6627	4	164	177
P13645|K1C10_HUMAN	R.NVSTGDVNVEMNAAPGVDLTQLLNNM(+15.99)R.S	Y	97.42	2887.38	2	963.469	3	63.44	15786	2	296	322	Oxidation (M)
P13645|K1C10_HUMAN	K.QSLEASLAETEGR.Y	Y	95.03	1389.67	1.3	695.845	2	38.26	8621	4	387	399
P13645|K1C10_HUMAN	R.NVSTGDVNVEM(+15.99)NAAPGVDLTQLLNNM(+15.99)R.S	Y	92.54	2903.38	1.9	1452.7	2	59.17	14590	6	296	322	Oxidation (M)
P13645|K1C10_HUMAN	K.ADLEMQIESLTEELAYLK.K	Y	85.94	2095.04	0.5	1048.53	2	83.36	20453	4	267	284
P13645|K1C10_HUMAN	K.IRLENEIQTYR.S	Y	85.07	1433.76	2	717.89	2	35.66	7871	4	440	450
P13645|K1C10_HUMAN	K.ADLEM(+15.99)QIESLTEELAYLK.K	Y	82.04	2111.03	2.7	1056.53	2	84.19	20576	4	267	284	Oxidation (M)
P13645|K1C10_HUMAN	R.LENEIQTYR.S	Y	80.28	1164.58	1	583.297	2	28.2	5665	2	442	450
P13645|K1C10_HUMAN	K.VTM(+15.99)QNLNDRLASYLDK.V	N	79.82	1895.94	1.6	948.979	2	45.48	10719	4	148	163	Oxidation (M)
P13645|K1C10_HUMAN	R.SQYEQLAEQNRK.D	Y	78.6	1492.73	1.6	747.372	2	20.97	3519	4	323	334
P13645|K1C10_HUMAN	K.VTMQNLNDR.L	N	76.75	1089.52	1.4	545.77	2	24.86	4673	2	148	156
P13645|K1C10_HUMAN	R.VLDELTLTK.A	Y	75.95	1030.59	1.3	516.303	2	41.74	9629	3	258	266
P13645|K1C10_HUMAN	R.QSVEADINGLR.R	N	75.15	1200.61	0.5	601.312	2	38.04	8559	2	246	256
P13645|K1C10_HUMAN	K.VTMQNLNDRLASYLDK.V	N	74.39	1879.95	1	940.981	2	52.56	12734	3	148	163
P13645|K1C10_HUMAN	K.YENEVALR.Q	Y	72.88	992.493	1.7	497.255	2	26.4	5135	4	238	245
P13645|K1C10_HUMAN	K.VTM(+15.99)QNLNDR.L	N	68.69	1105.52	0.3	553.767	2	15.04	1769	9	148	156	Oxidation (M)
P13645|K1C10_HUMAN	R.LKYENEVALR.Q	Y	68.39	1233.67	0.4	617.843	2	30.45	6334	4	236	245
P13645|K1C10_HUMAN	R.NVSTGDVNVEMNAAPGVDLTQLLNNMR.S	Y	64.7	2871.39	-1.2	958.135	3	72.79	18378	1	296	322
P13645|K1C10_HUMAN	R.RVLDELTLTK.A	Y	63.52	1186.69	0.7	594.354	2	39.06	8853	3	257	266
P13645|K1C10_HUMAN	K.DAEAWFNEK.S	N	61.63	1108.48	5.3	555.251	2	42.66	9902	2	335	343
P13645|K1C10_HUMAN	K.DLRNVSTGDVNVEM(+15.99)NAAPGVDLTQLLNNM(+15.99)R.S	Y	61.02	3287.59	3.7	1096.87	3	59.34	14638	2	293	322	Oxidation (M)
P13645|K1C10_HUMAN	R.LASYLDK.V	N	58.25	808.433	2	405.225	2	26.12	5052	2	157	163
P13645|K1C10_HUMAN	R.LAADDFR.L	N	57.01	806.392	1.1	404.204	2	28.05	5618	2	229	235
P13645|K1C10_HUMAN	K.SEITELRR.N	Y	53.03	1002.55	1.7	502.281	2	22.37	3938	2	363	370
P13645|K1C10_HUMAN	R.QSVEADINGLRR.V	N	50.55	1356.71	-0.2	679.363	2	33.89	7345	4	246	257
P13645|K1C10_HUMAN	R.YC(+57.02)VQLSQIQAQISALEEQLQQIR.A	Y	49.78	2745.41	-1.3	916.143	3	83.09	20420	2	400	422	Carbamidomethylation
P13645|K1C10_HUMAN	K.ADLEM(+15.99)QIESLTEELAYLKK.N	Y	43.32	2239.13	1.9	747.385	3	75.1	18963	2	267	285	Oxidation (M)
P13645|K1C10_HUMAN	K.TIDDLK.N	N	41.24	703.375	2.2	352.696	2	20.63	3415	2	202	207
P13645|K1C10_HUMAN	K.ADLEMQIESLTEELAYLKK.N	Y	38.18	2223.13	1.4	742.053	3	74.53	18812	1	267	285
P13645|K1C10_HUMAN	R.LAADDFRLK.Y	N	37.3	1047.57	1.2	350.198	3	36.76	8187	2	229	237
P13645|K1C10_HUMAN	K.EWYEK.H	Y	30.95	753.333	1.6	377.675	2	24.5	4570	2	180	184
P04264|K2C1_HUMAN	R.FSSC(+57.02)GGGGGSFGAGGGFGSR.S	Y	116.24	1764.73	0.5	883.371	2	36.12	8003	2	46	65	Carbamidomethylation
P04264|K2C1_HUMAN	K.QISNLQQSISDAEQR.G	Y	107.35	1715.84	2.3	858.931	2	39.94	9106	4	418	432
P04264|K2C1_HUMAN	K.SKAEAESLYQSKYEELQITAGR.H	Y	101.38	2500.24	0.9	834.423	3	41.54	9574	3	365	386
P04264|K2C1_HUMAN	R.SGGGFSSGSAGIINYQR.R	Y	100.72	1656.79	2.5	829.402	2	39.65	9026	2	13	29
P04264|K2C1_HUMAN	K.LNDLEDALQQAK.E	Y	100.28	1356.69	1.2	679.352	2	44.26	10366	2	444	455
P04264|K2C1_HUMAN	R.GGGGGGYGSGGSSYGSGGGSYGSGGGGGGGR.G	Y	97.96	2382.94	2.2	1192.48	2	21.78	3765	4	519	549
P04264|K2C1_HUMAN	K.NKLNDLEDALQQAK.E	Y	97.03	1598.83	1.1	800.421	2	46.61	11040	4	442	455
P04264|K2C1_HUMAN	R.SLDLDSIIAEVK.A	Y	96.48	1301.71	1.5	651.862	2	65.46	16349	7	344	355
P04264|K2C1_HUMAN	K.WELLQQVDTSTR.T	Y	94.9	1474.74	0.6	738.379	2	51.24	12359	4	212	223
P04264|K2C1_HUMAN	K.LALDLEIATYR.T	N	92.36	1276.7	1.2	639.359	2	57	13976	5	473	483
P04264|K2C1_HUMAN	R.FLEQQNQVLQTK.W	N	89.73	1474.78	1.9	738.398	2	34.81	7616	4	200	211
P04264|K2C1_HUMAN	R.TNAENEFVTIKK.D	Y	87.84	1392.72	1.2	697.37	2	30.31	6292	4	278	289
P04264|K2C1_HUMAN	K.SLNNQFASFIDK.V	Y	86.84	1382.68	1.1	692.35	2	52.43	12695	2	186	197
P04264|K2C1_HUMAN	K.SKAEAESLYQSK.Y	Y	86.51	1339.66	0.9	670.839	2	20.07	3249	4	365	376
P04264|K2C1_HUMAN	K.AEAESLYQSK.Y	Y	86.11	1124.53	2.1	563.276	2	22.73	4049	2	367	376
P04264|K2C1_HUMAN	R.LLRDYQELMNTK.L	Y	83.06	1522.78	0.5	762.398	2	40.81	9360	4	461	472
P04264|K2C1_HUMAN	K.YEELQITAGR.H	N	80.91	1178.59	1.6	590.305	2	35.73	7888	2	377	386
P04264|K2C1_HUMAN	R.MSGEC(+57.02)APNVSVSVSTSHTTISGGGSR.G	Y	79.16	2564.16	1.5	855.728	3	34.75	7600	2	493	518	Carbamidomethylation
P04264|K2C1_HUMAN	K.LNDLEDALQQAKEDLAR.L	Y	77.62	1940.98	0.2	971.498	2	61.14	15141	3	444	460
P04264|K2C1_HUMAN	K.VRFLEQQNQVLQTK.W	N	76.66	1729.95	1	865.982	2	37.26	8332	3	198	211
P04264|K2C1_HUMAN	K.AEAESLYQSKYEELQITAGR.H	Y	76.58	2285.12	1.2	762.714	3	44.5	10437	2	367	386
P04264|K2C1_HUMAN	R.THNLEPYFESFINNLR.R	Y	76.32	1992.97	1.7	665.332	3	67.28	16856	2	224	239
P04264|K2C1_HUMAN	K.DVDGAYMTK.V	Y	75.69	998.438	1.2	500.227	2	24.14	4464	2	290	298
P04264|K2C1_HUMAN	K.AQYEDIAQK.S	Y	74.57	1064.51	2.3	533.265	2	22.01	3833	2	356	364
P04264|K2C1_HUMAN	R.M(+15.99)SGEC(+57.02)APNVSVSVSTSHTTISGGGSR.G	Y	74.4	2580.15	2.5	861.061	3	32.97	7075	2	493	518	Oxidation (M); Carbamidomethylation
P04264|K2C1_HUMAN	K.NM(+15.99)QDMVEDYR.N	Y	72.58	1315.52	0.4	658.766	2	28.29	5694	2	258	267	Oxidation (M)
P04264|K2C1_HUMAN	K.KQISNLQQSISDAEQR.G	Y	71.33	1843.94	0.9	615.654	3	34.16	7426	2	417	432
P04264|K2C1_HUMAN	K.RTNAENEFVTIKK.D	Y	71.16	1548.83	2.6	517.284	3	25.91	4989	3	277	289
P04264|K2C1_HUMAN	R.TLLEGEESR.M	Y	70.04	1032.51	0.3	517.262	2	25.42	4841	2	484	492
[truncated: 7,581 more rows]
