# Supplementary material for: Low Levels of IgG Recognizing the Alpha-1-Antitrypsin (A1AT) <sup>50-63</sup> Peptide and Its Association with Taiwanese Women with Primary Sj&ouml;gren's Syndrome
Source: Preprints.org preprint supplement (doi:10.20944/preprints201710.0180.v1), 2017-10-30
Supplement: Supplementary file 4 [file supplementary]

A

A1AG1

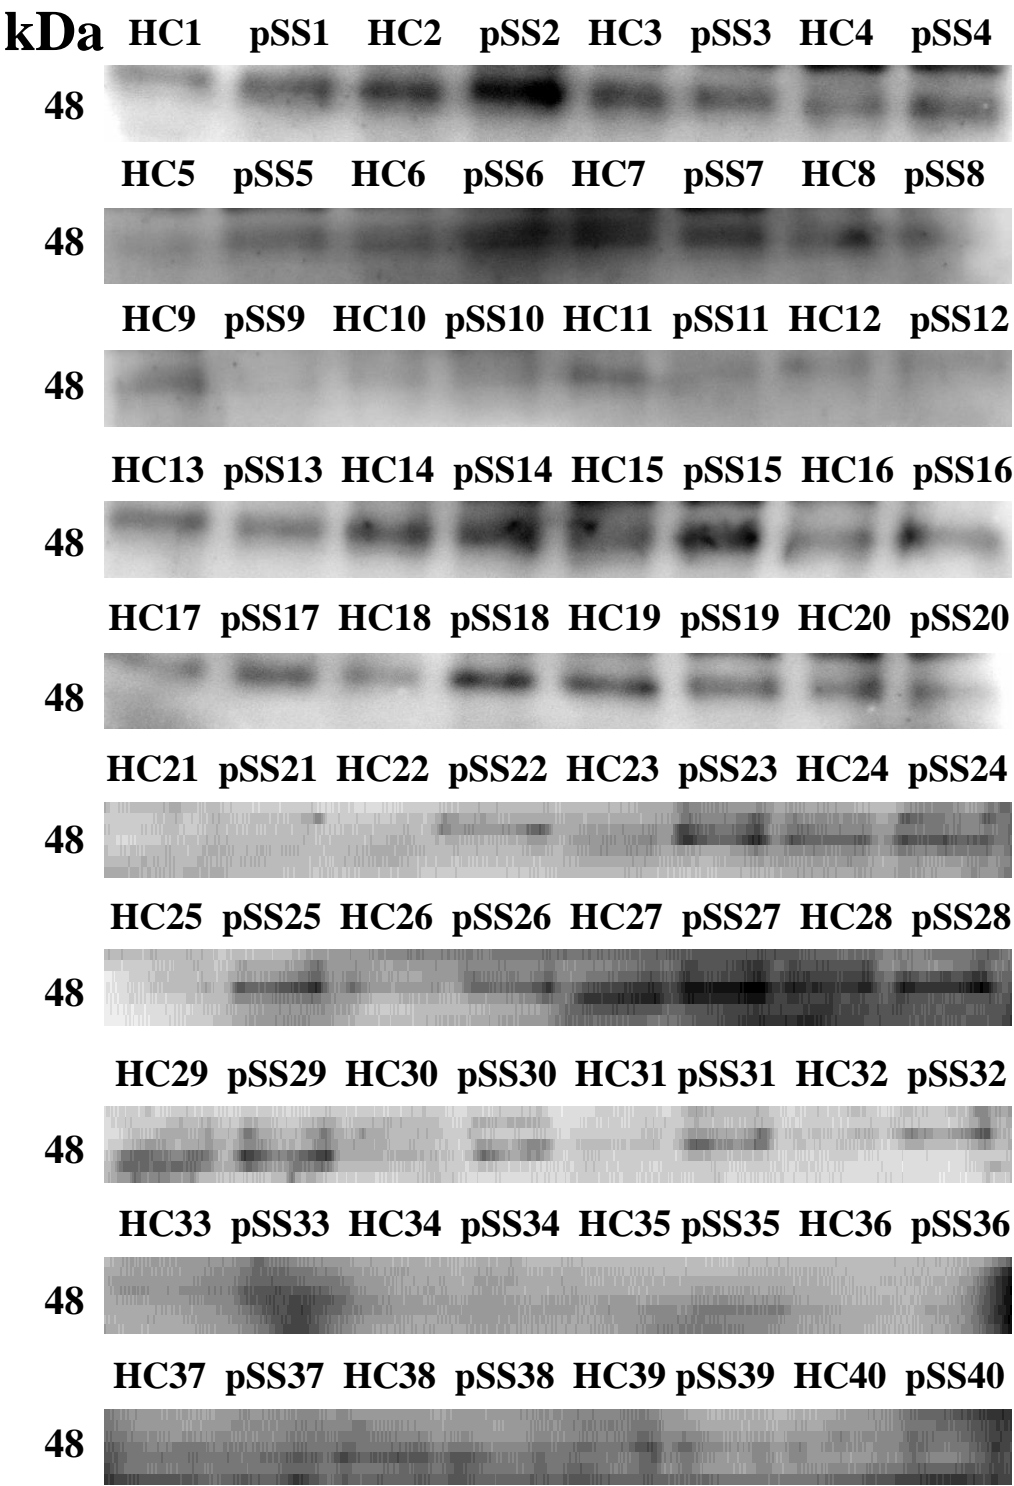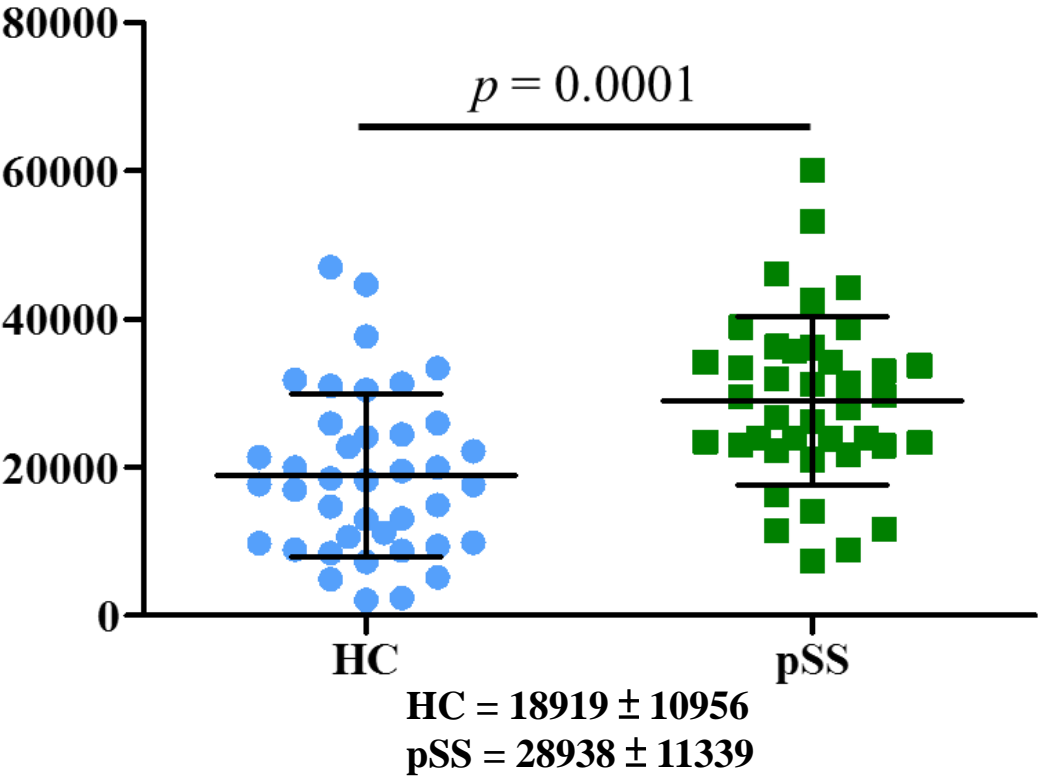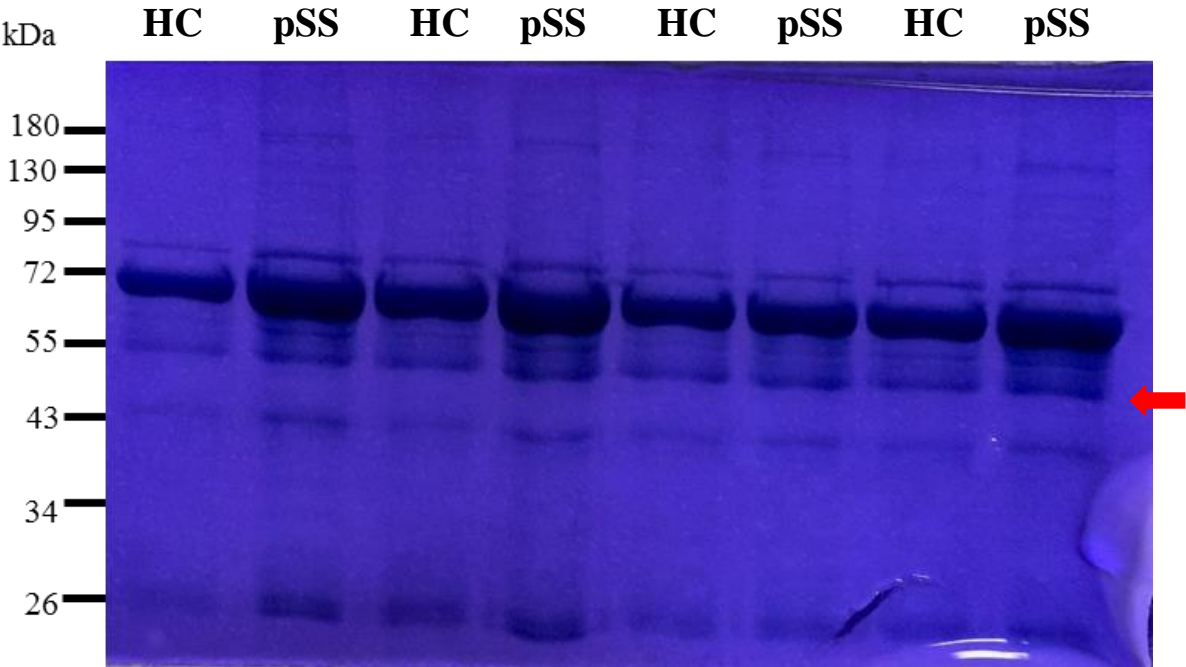

B

A1AT

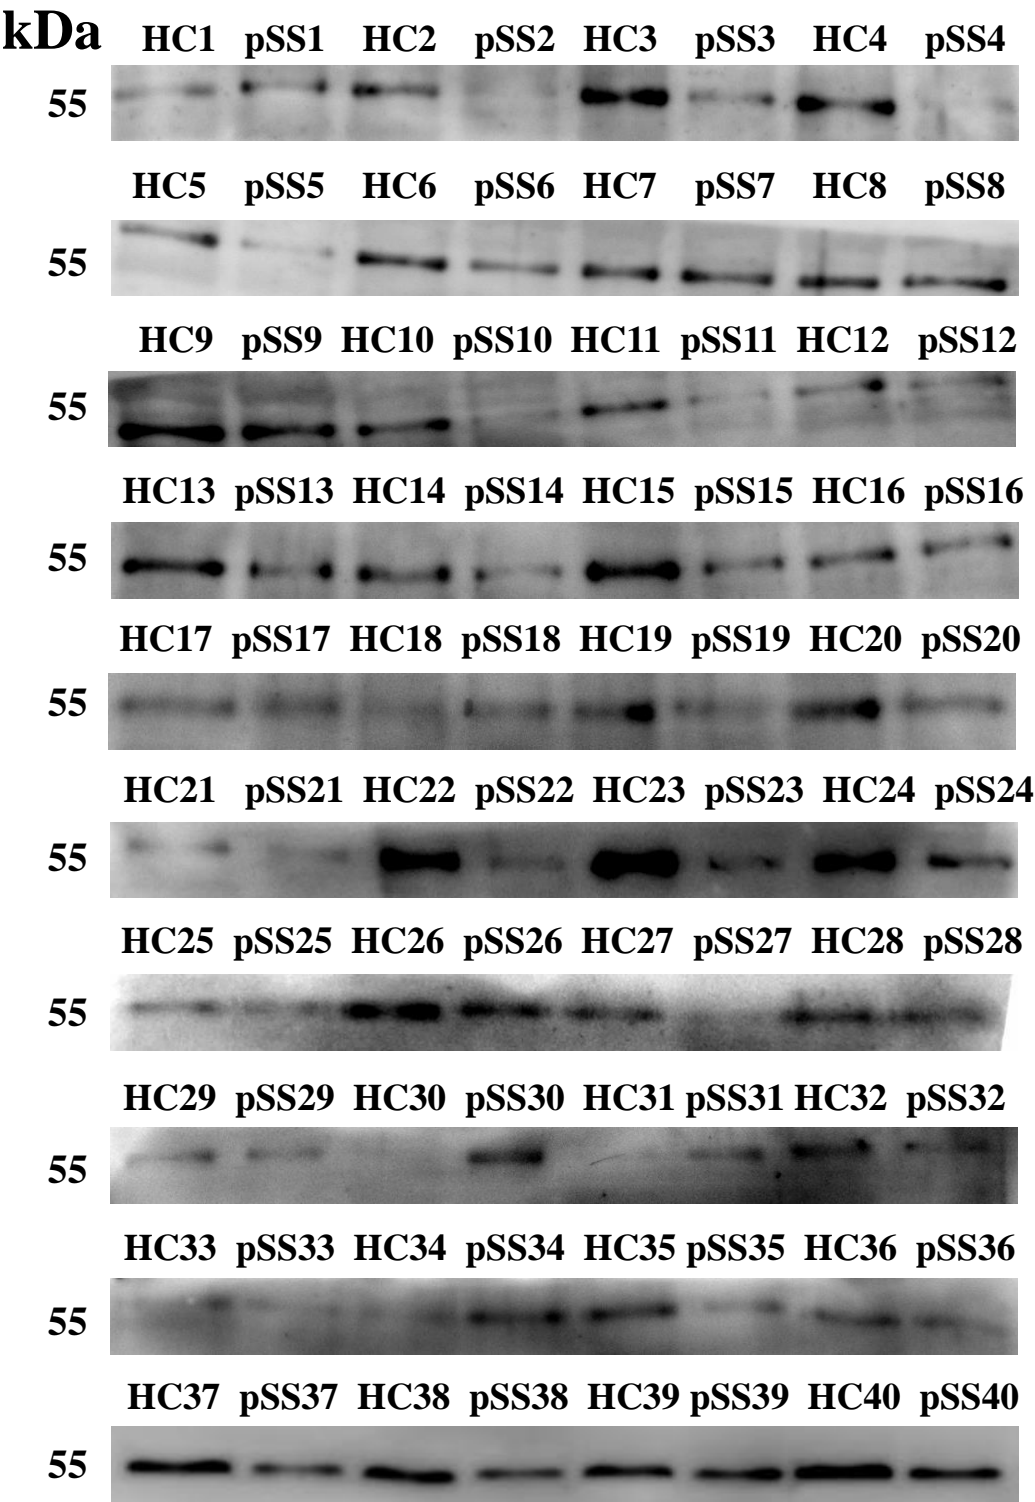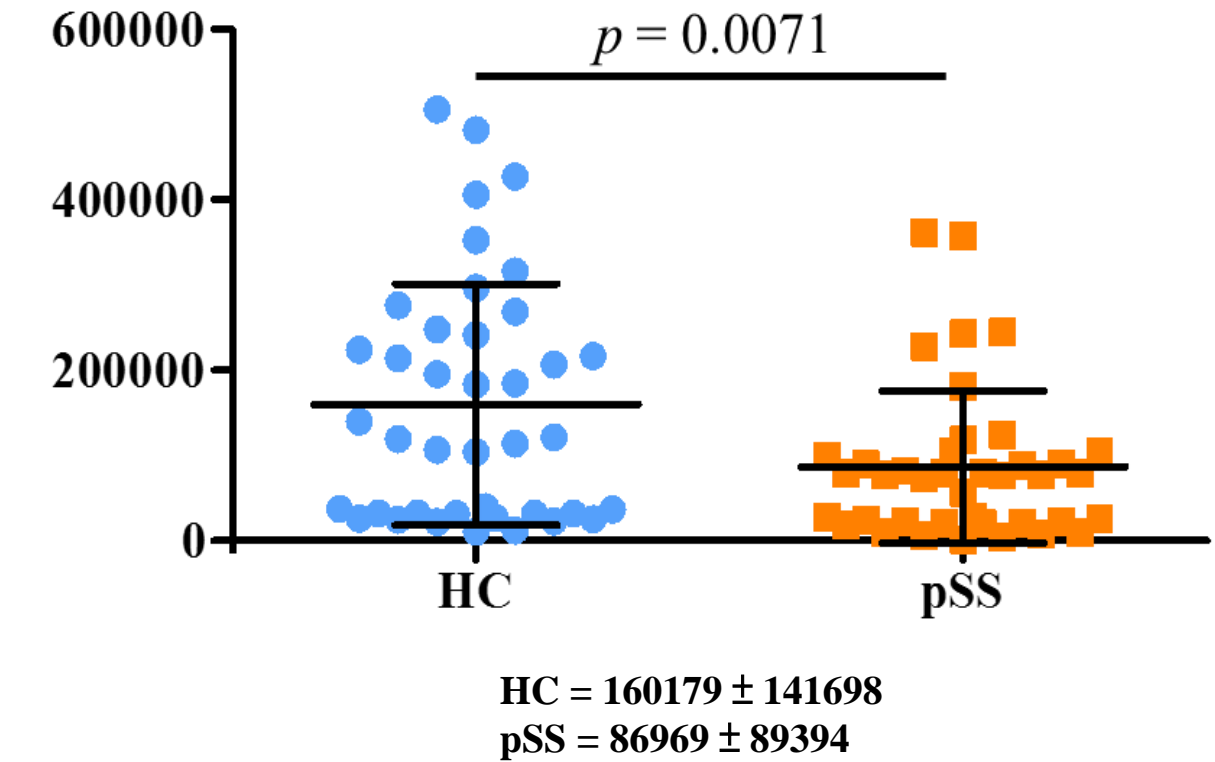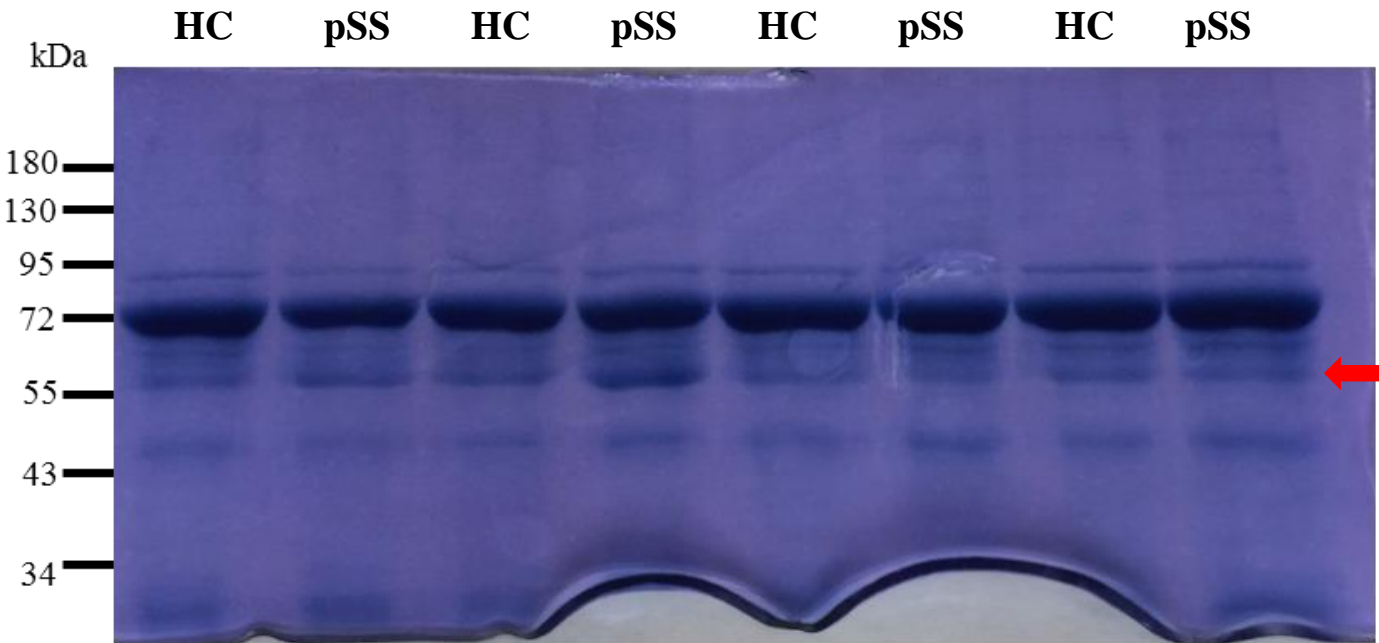

C

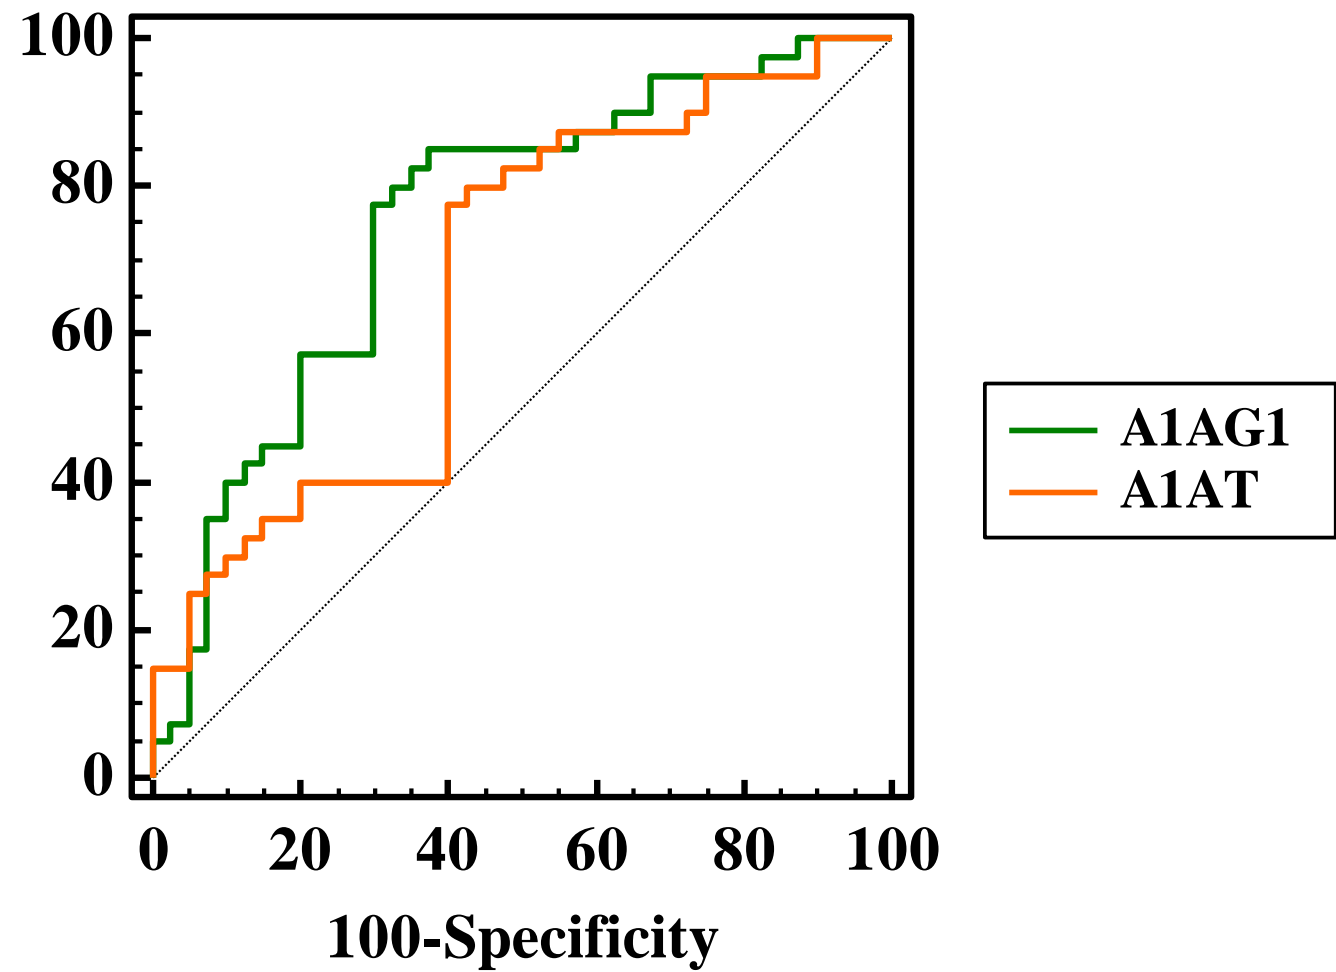

|       | AUC (95% C.I.)     | Sensitivity (95% C.I.) | Specificity (95% C.I.) |
|-------|--------------------|------------------------|------------------------|
| A1AG1 | 0.75 (0.64 - 0.84) | 85.0% (70.2 - 94.3)    | 62.5% (45.8 - 77.3)    |
| A1AT  | 0.67 (0.56 - 0.77) | 77.5% (61.5 - 89.2)    | 60.0% (43.3 - 75.1)    |

Figure 1. Protein levels of A1AG1 and A1AT in serum were examined using anti-A1AG1 (A), and anti-A1AT (B) antibodies through Western blotting. Average blot densitometric values were calculated from duplicate data. Percentages of SDS-PAGE gel and loading amounts of serum proteins used in Western blotting were 10% and 2  $\mu$ g for A1AG1, and 8% and 2  $\mu$ g for A1AT, respectively. A duplicate gel was stained with Coomassie brilliant blue (CBB) as a loading control (right, bottom panel). The red arrow indicates the A1AG1 or A1AT protein. Receiver operating characteristic (ROC) curves were generated according to blot densitometry of A1AG1 and A1AT. The area under the ROC curve (AUC), sensitivity, and specificity were further estimated (C).
