# Supplementary material for: Low Levels of IgG Recognizing the Alpha-1-Antitrypsin (A1AT) <sup>50-63</sup> Peptide and Its Association with Taiwanese Women with Primary Sj&ouml;gren's Syndrome
Source: Preprints.org preprint supplement (doi:10.20944/preprints201710.0180.v1), 2017-10-30
Supplement: Supplementary file 5 [file supplementary]

Table 2. Association among HNE-protein adduct, serum A1AT, anti-A1AT<sup>50-63</sup> and their HNE-modified peptides antibodies and pSS patients, in patients with pSS vs. healthy controls.

| Risk factor                        | Cut-off     | HC, n | pSS, n | Age-adjusted logistic regression model <sup>a</sup> |                | Power |
|------------------------------------|-------------|-------|--------|-----------------------------------------------------|----------------|-------|
|                                    |             |       |        | ORs (95% CI)                                        | <i>p</i> value |       |
| HNE-protein adduct                 | ≥ 2.884     | 29    | 43     | 1.0 (ref)                                           |                | 0.708 |
|                                    | < 2.884     | 20    | 6      | 4.887 (1.744 - 13.637)                              | 0.003          |       |
| Serum A1AT                         | ≥ 123574.37 | 19    | 7      | 1.0 (ref)                                           |                | 0.726 |
|                                    | < 123574.37 | 21    | 33     | 3.910 (1.384 - 11.035)                              | 0.010          |       |
| Anti-A1AT <sup>50-63</sup> IgG     | ≥ 0.407     | 21    | 9      | 1.0 (ref)                                           |                | 0.802 |
|                                    | < 0.407     | 28    | 40     | 3.360 (1.336 - 8.451)                               | 0.010          |       |
| Anti-A1AT <sup>50-63</sup> HNE IgG | ≥ 0.350     | 22    | 13     | 1.0 (ref)                                           |                | 0.500 |
|                                    | < 0.350     | 27    | 36     | 2.263 (0.967 - 5.299)                               | 0.060          |       |
| Anti-A1AT <sup>50-63</sup> IgA     | ≥ 1.796     | 25    | 19     | 1.0 (ref)                                           |                | 0.232 |
|                                    | < 1.796     | 24    | 30     | 1.650 (0.738 - 3.687)                               | 0.222          |       |
| Anti-A1AT <sup>50-63</sup> HNE IgA | ≥ 1.903     | 28    | 21     | 1.0 (ref)                                           |                | 0.293 |
|                                    | < 1.903     | 21    | 28     | 1.786 (0.801 - 3.986)                               | 0.157          |       |

a. OR, odds ratio, ref, reference value.
