# Supplementary material for: Low Levels of IgG Recognizing the Alpha-1-Antitrypsin (A1AT) <sup>50-63</sup> Peptide and Its Association with Taiwanese Women with Primary Sj&ouml;gren's Syndrome
Source: Preprints.org preprint supplement (doi:10.20944/preprints201710.0180.v1), 2017-10-30
Supplement: Supplementary file 6 [file supplementary]

Table 1. Differentially expressed serum proteins identified by in-solution digestion and LC-MS/MS analysis in patients with primary Sjögren's syndrome (pSS) and healthy controls (HCs).

| Protein ID | Symbol | Protein Name                          | Normalized average spectral counts (mean $\pm$ RSD%) |                        | -10lgP | Fold Change <sup>a</sup> |
|------------|--------|---------------------------------------|------------------------------------------------------|------------------------|--------|--------------------------|
|            |        |                                       | Normal                                               | pSS                    |        |                          |
| P02763     | A1AG1  | Alpha-1-acid glycoprotein 1           | 1528333 $\pm$ 1.76                                   | 3740000 $\pm$ 6.64     | 23.5   | $\uparrow$ 2.4           |
| P00738     | HPT    | Haptoglobin                           | 730666667 $\pm$ 11.29                                | 1223333333 $\pm$ 40.04 | 44.0   | $\uparrow$ 1.7           |
| P69905     | HBA    | Hemoglobin subunit alpha              | 56900000 $\pm$ 32.80                                 | 87200000 $\pm$ 9.86    | 32.4   | $\uparrow$ 1.5           |
| P00739     | HPTR   | Haptoglobin-related protein           | 10410000 $\pm$ 3.53                                  | 15366667 $\pm$ 4.97    | 30.4   | $\uparrow$ 1.5           |
| P01781     | HV320  | Ig heavy chain V-III region GAL       | 3339000 $\pm$ 1.48                                   | 4910000 $\pm$ 15.60    | 22.1   | $\uparrow$ 1.5           |
| P68871     | HBB    | Hemoglobin subunit beta               | 47033333 $\pm$ 19.59                                 | 63500000 $\pm$ 17.09   | 26.5   | $\uparrow$ 1.4           |
| P01860     | IGHG3  | Ig gamma-3 chain C region             | 6816667 $\pm$ 10.72                                  | 8310000 $\pm$ 5.22     | 23.6   | $\uparrow$ 1.2           |
| O75636     | FCN3   | Ficolin-3                             | 8266667 $\pm$ 3.99                                   | 8640000 $\pm$ 3.09     | 27.2   | $\downarrow$ 1.0         |
| P01857     | IGHG1  | Ig gamma-1 chain C region             | 161000000 $\pm$ 10.64                                | 163000000 $\pm$ 7.53   | 21.6   | $\downarrow$ 1.0         |
| P01591     | IGJ    | Immunoglobulin J chain                | 18366667 $\pm$ 5.63                                  | 18300000 $\pm$ 12.91   | 21.1   | $\downarrow$ 1.0         |
| P02749     | APOH   | Beta-2-glycoprotein 1                 | 15363333 $\pm$ 3.01                                  | 15266667 $\pm$ 3.27    | 25.6   | $\downarrow$ 1.0         |
| P02745     | C1QA   | Complement C1q subcomponent subunit A | 5913333 $\pm$ 3.85                                   | 5410000 $\pm$ 7.56     | 21.6   | $\downarrow$ 1.1         |
| P20742     | PZP    | Pregnancy zone protein                | 3450000 $\pm$ 7.97                                   | 3130000 $\pm$ 7.19     | 25.9   | $\downarrow$ 1.1         |
| P06681     | CO2    | Complement C2                         | 2213333 $\pm$ 4.01                                   | 1906667 $\pm$ 11.73    | 20.6   | $\downarrow$ 1.2         |
| P13671     | CO6    | Complement component C6               | 4256667 $\pm$ 6.68                                   | 3483333 $\pm$ 9.82     | 34.0   | $\downarrow$ 1.2         |
| P04003     | C4BPA  | C4b-binding protein alpha chain       | 38466667 $\pm$ 14.64                                 | 31133333 $\pm$ 7.59    | 24.3   | $\downarrow$ 1.2         |
| P04196     | HRG    | Histidine-rich glycoprotein           | 30800000 $\pm$ 5.97                                  | 24233333 $\pm$ 18.20   | 24.9   | $\downarrow$ 1.3         |
| P05090     | APOD   | Apolipoprotein D                      | 6350000 $\pm$ 5.43                                   | 4936667 $\pm$ 10.03    | 26.4   | $\downarrow$ 1.3         |
| P01024     | CO3    | Complement C3                         | 175666667 $\pm$ 14.62                                | 135000000 $\pm$ 9.04   | 36.3   | $\downarrow$ 1.3         |
| P08697     | A2AP   | Alpha-2-antiplasmin                   | 2643333 $\pm$ 9.92                                   | 1880000 $\pm$ 10.03    | 23.8   | $\downarrow$ 1.4         |
| P10909     | CLUS   | Clusterin                             | 20466667 $\pm$ 12.03                                 | 14500000 $\pm$ 11.06   | 31.1   | $\downarrow$ 1.4         |
| P00734     | THRB   | Prothrombin                           | 27733333 $\pm$ 16.53                                 | 19566667 $\pm$ 16.23   | 27.0   | $\downarrow$ 1.4         |
| P09871     | C1S    | Complement C1s subcomponent           | 5006667 $\pm$ 6.47                                   | 3423333 $\pm$ 3.91     | 36.7   | $\downarrow$ 1.5         |
| P00736     | C1R    | Complement C1r subcomponent           | 5373333 $\pm$ 9.76                                   | 3450000 $\pm$ 4.28     | 37.2   | $\downarrow$ 1.6         |
| P02647     | APOA1  | Apolipoprotein A-I                    | 36466667 $\pm$ 33.11                                 | 21866667 $\pm$ 16.56   | 44.8   | $\downarrow$ 1.7         |
| P02655     | APOC2  | Apolipoprotein C-II                   | 1356667 $\pm$ 53.91                                  | 785000 $\pm$ 4.70      | 39.7   | $\downarrow$ 1.7         |
| P05160     | F13B   | Coagulation factor XIII B chain       | 431667 $\pm$ 5.81                                    | 228667 $\pm$ 3.58      | 21.7   | $\downarrow$ 1.9         |
| P01009     | A1AT   | Alpha-1-antitrypsin                   | 50366667 $\pm$ 8.66                                  | 19766667 $\pm$ 29.04   | 72.6   | $\downarrow$ 2.5         |

a. Fold change represent increment ( $\uparrow$ ) and reduction ( $\downarrow$ ) fold change compared with pSS vs. HC.
