# Supplementary material for: Low Levels of IgG Recognizing the Alpha-1-Antitrypsin (A1AT) <sup>50-63</sup> Peptide and Its Association with Taiwanese Women with Primary Sj&ouml;gren's Syndrome
Source: Preprints.org preprint supplement (doi:10.20944/preprints201710.0180.v1), 2017-10-30
Supplement: Supplementary file 7 [file supplementary]

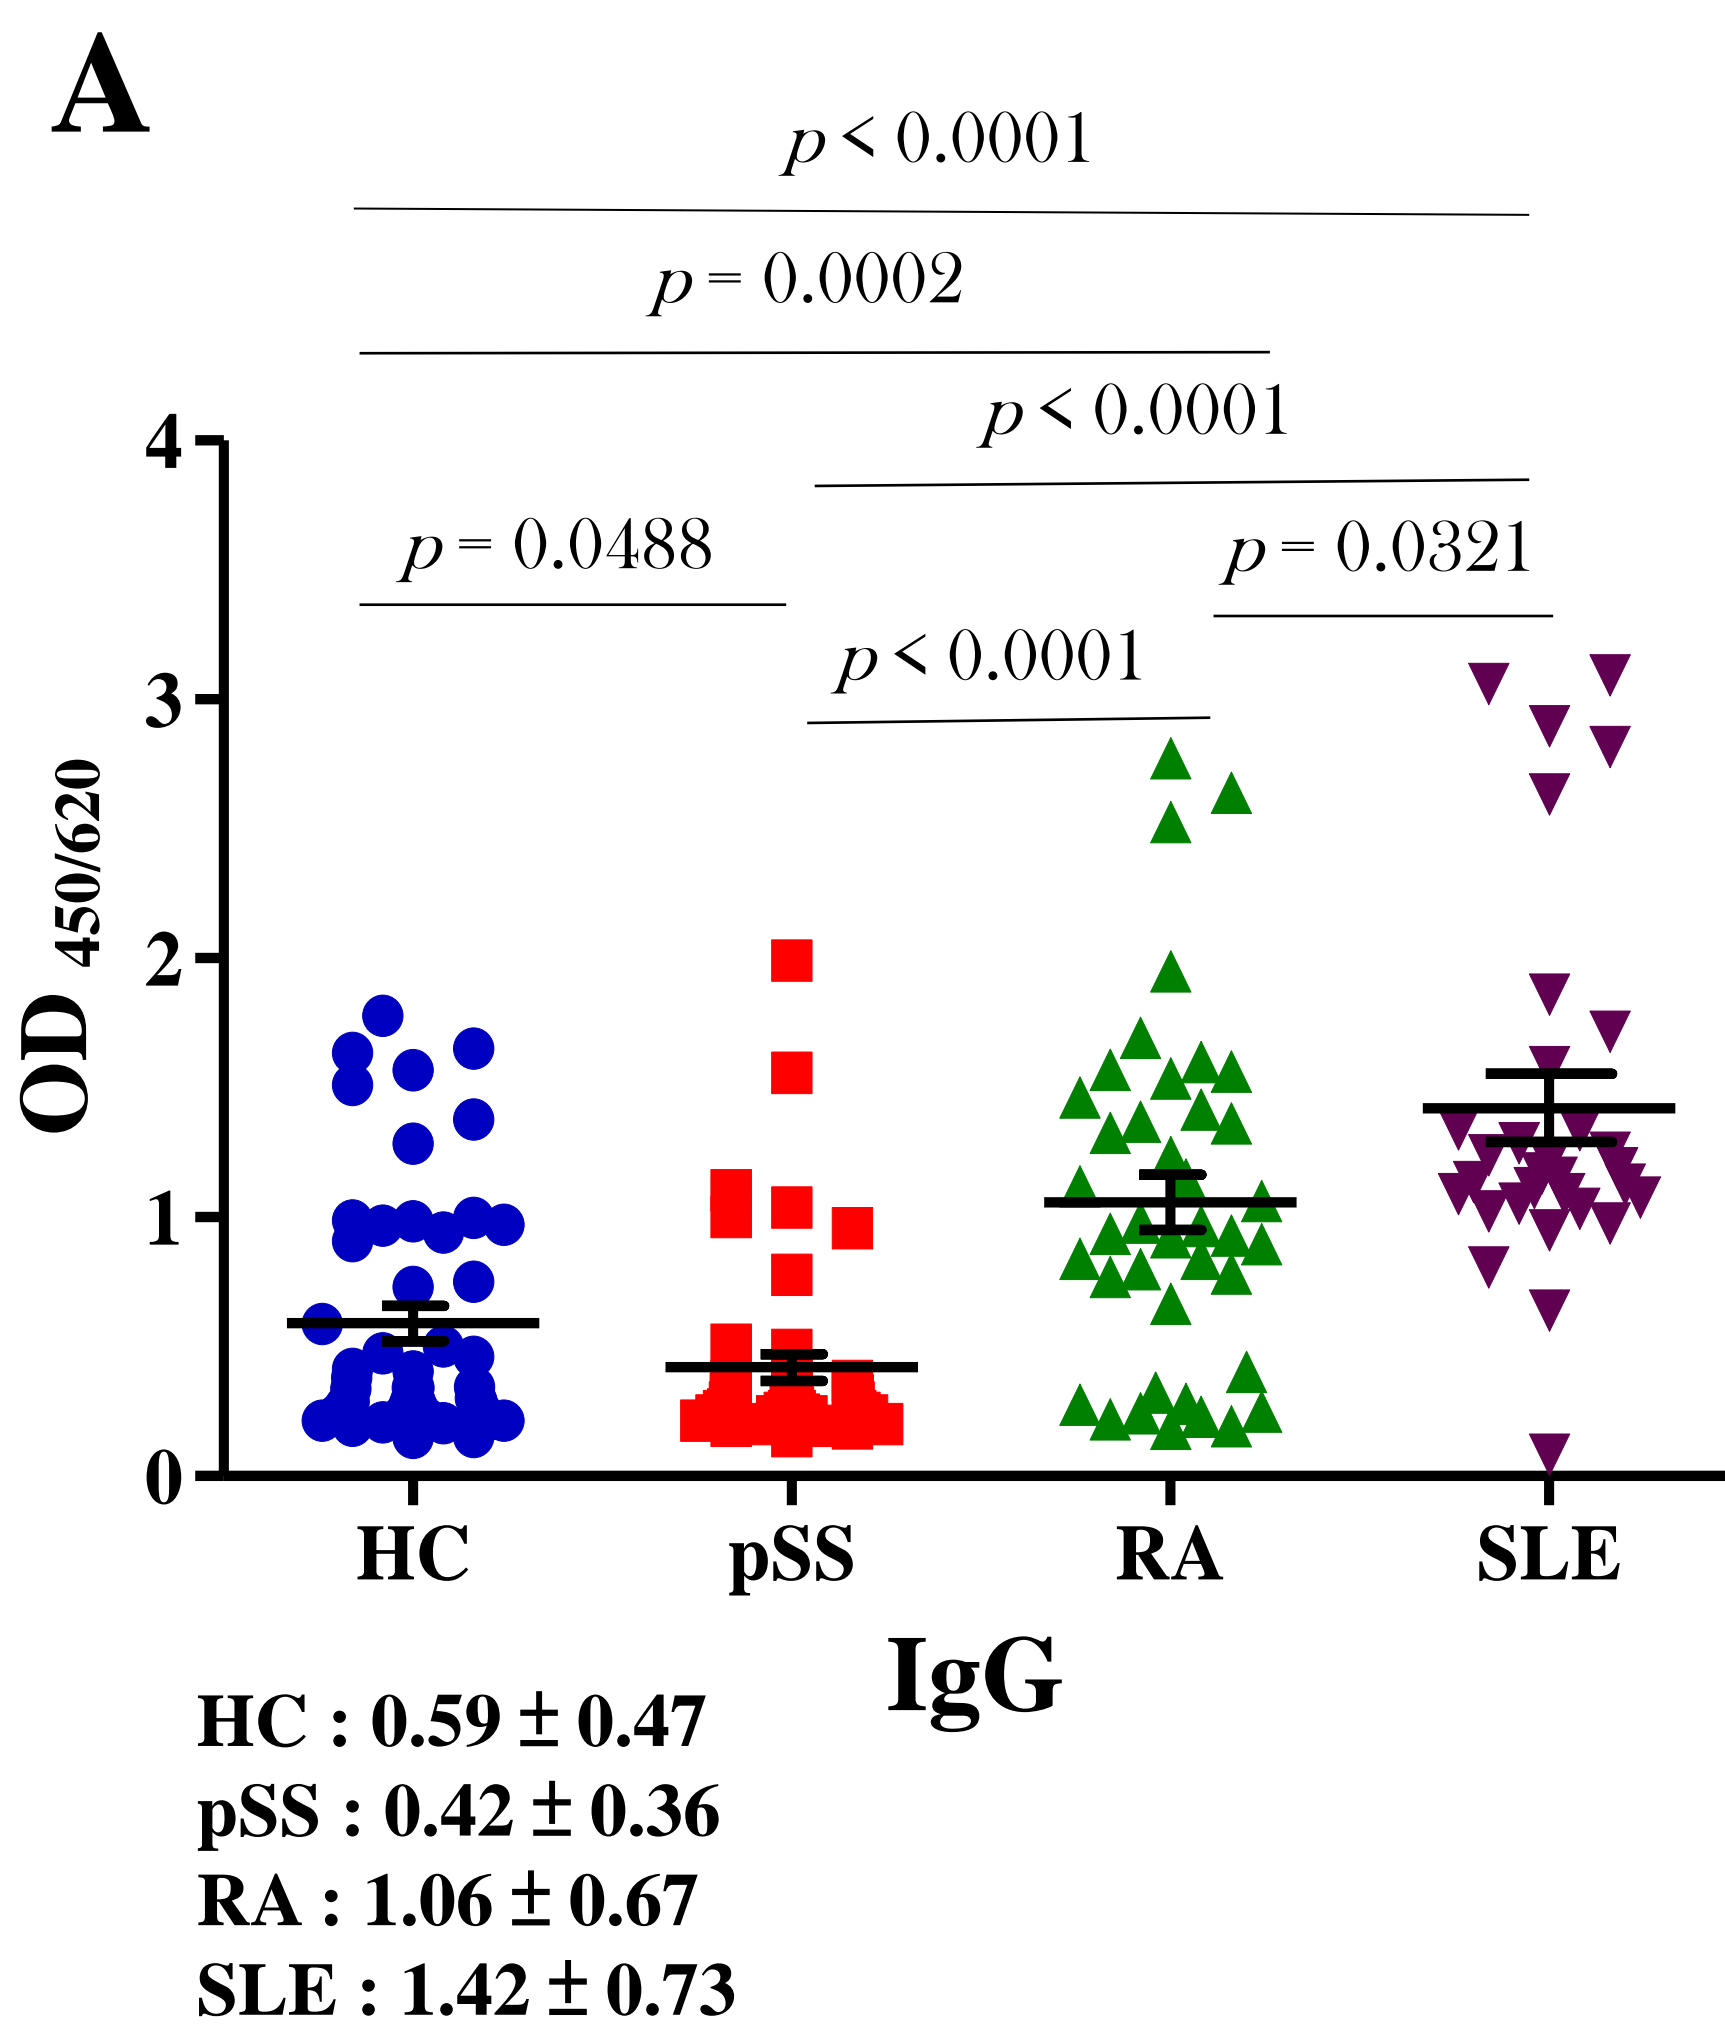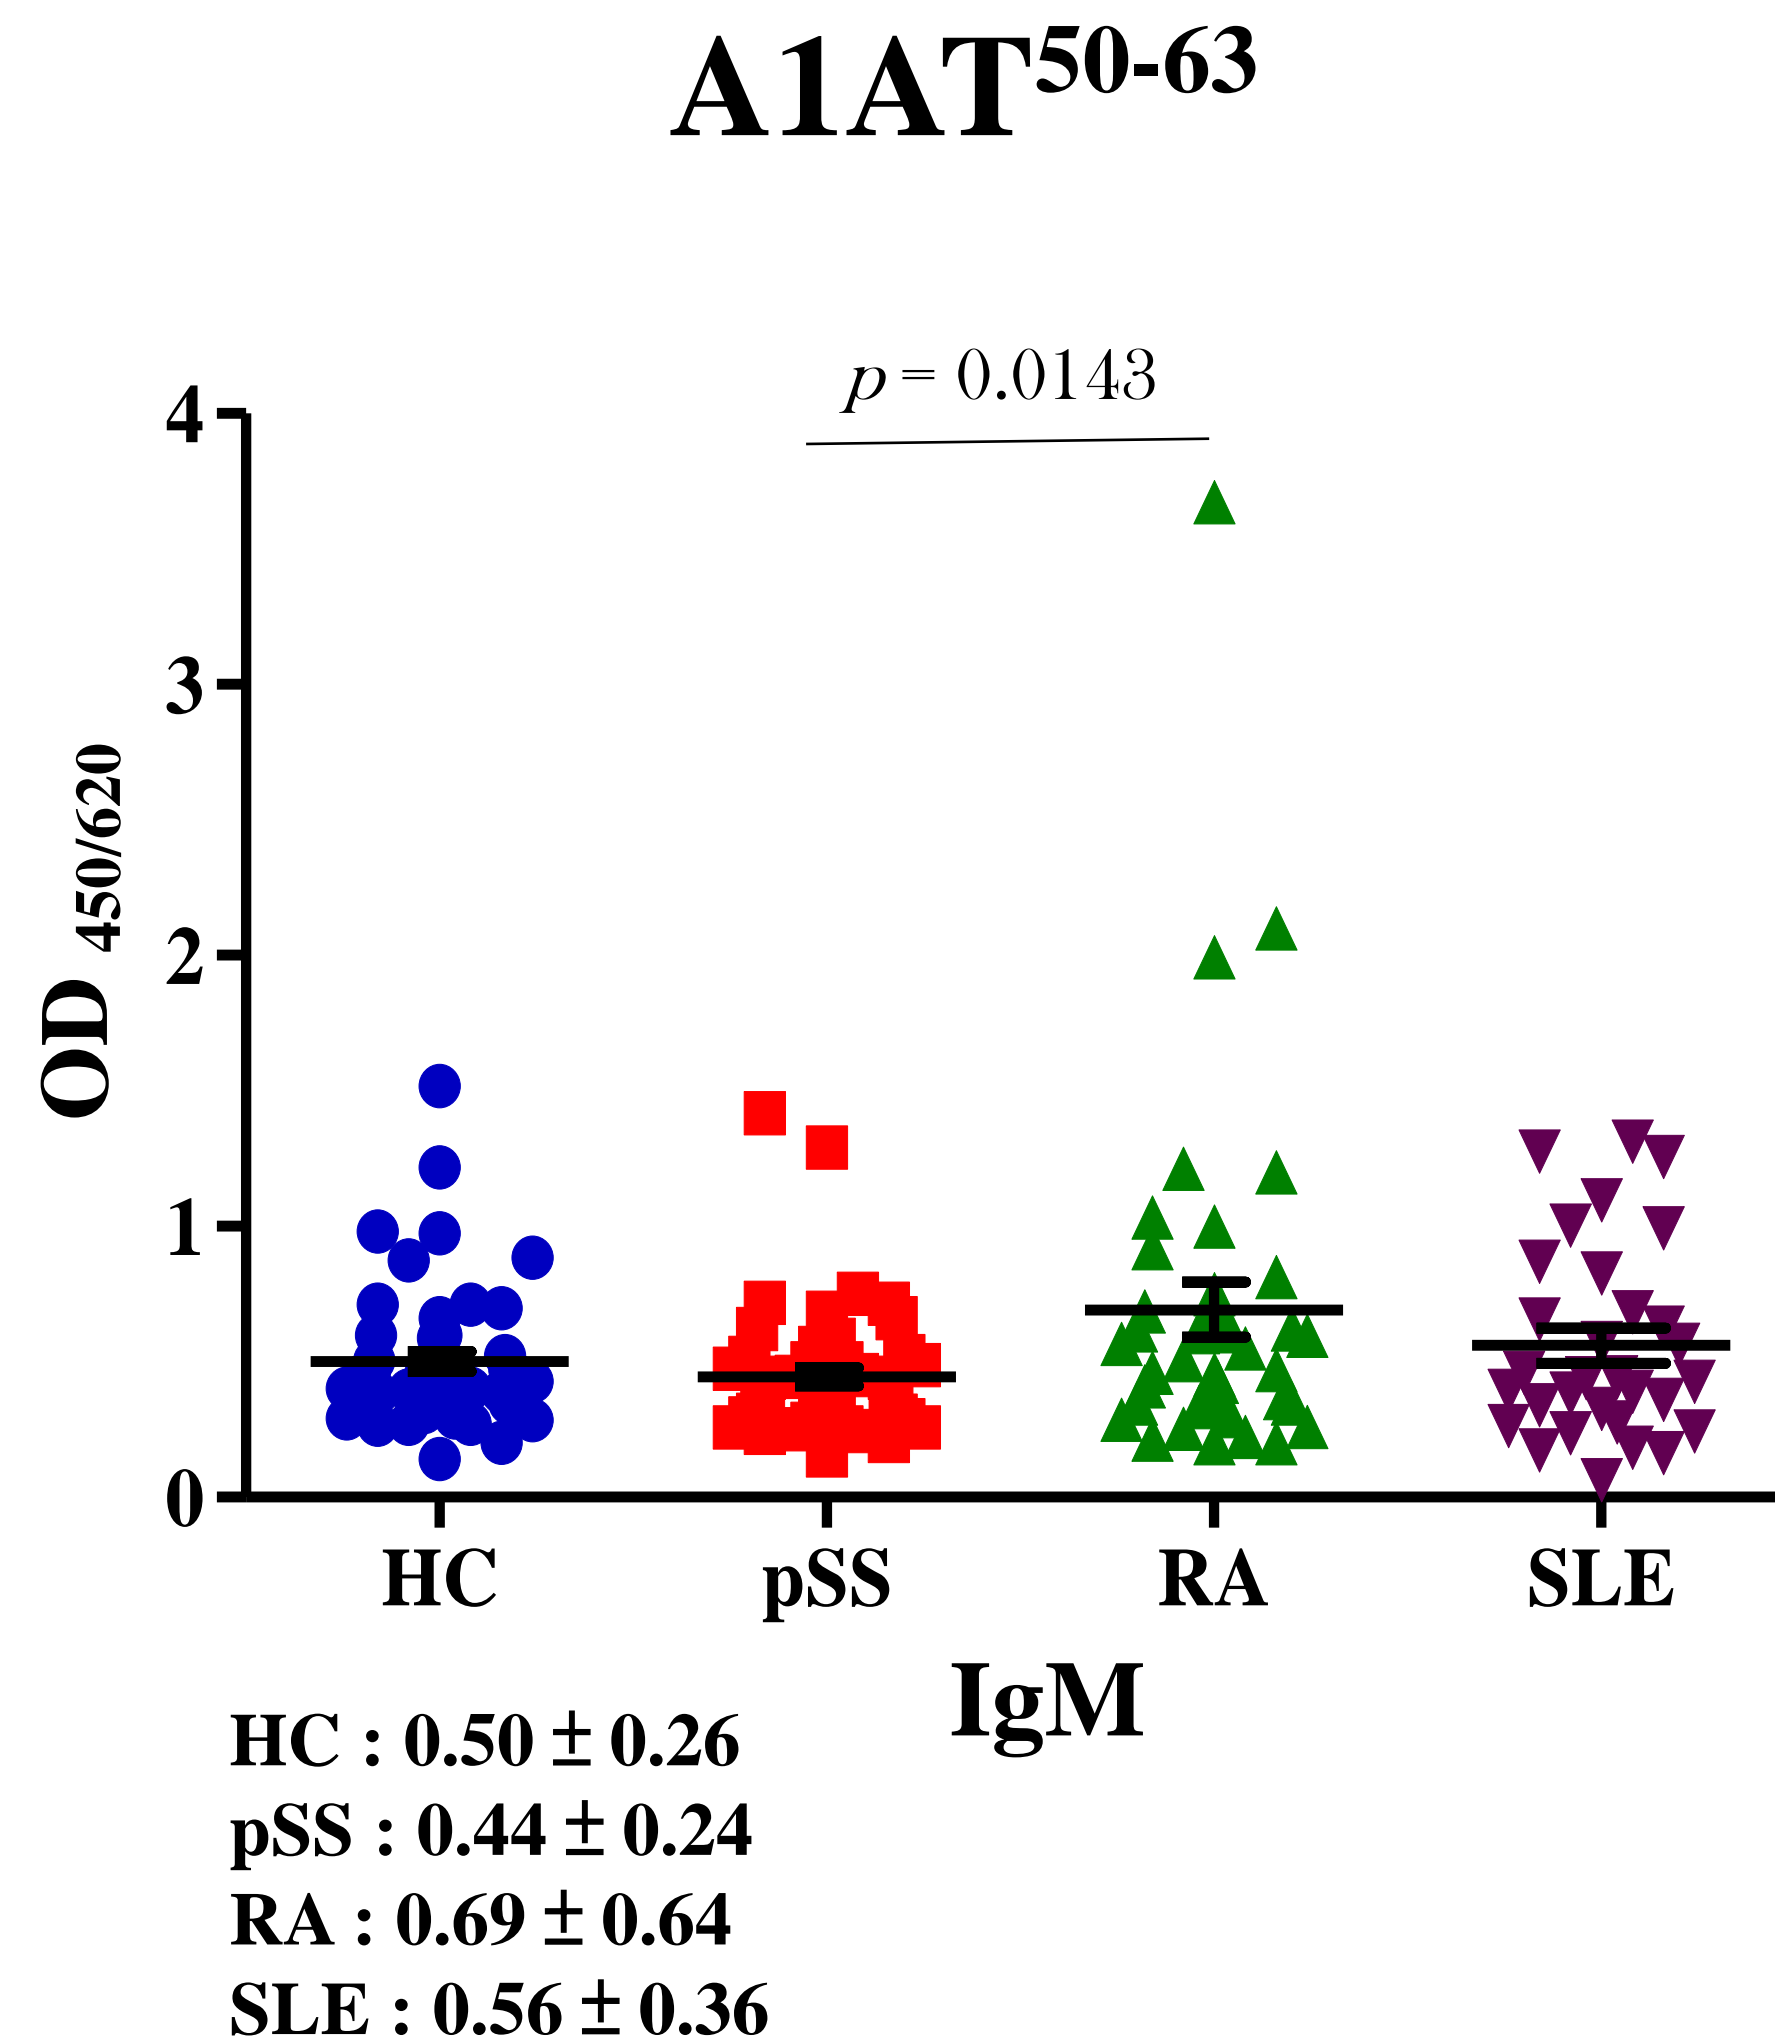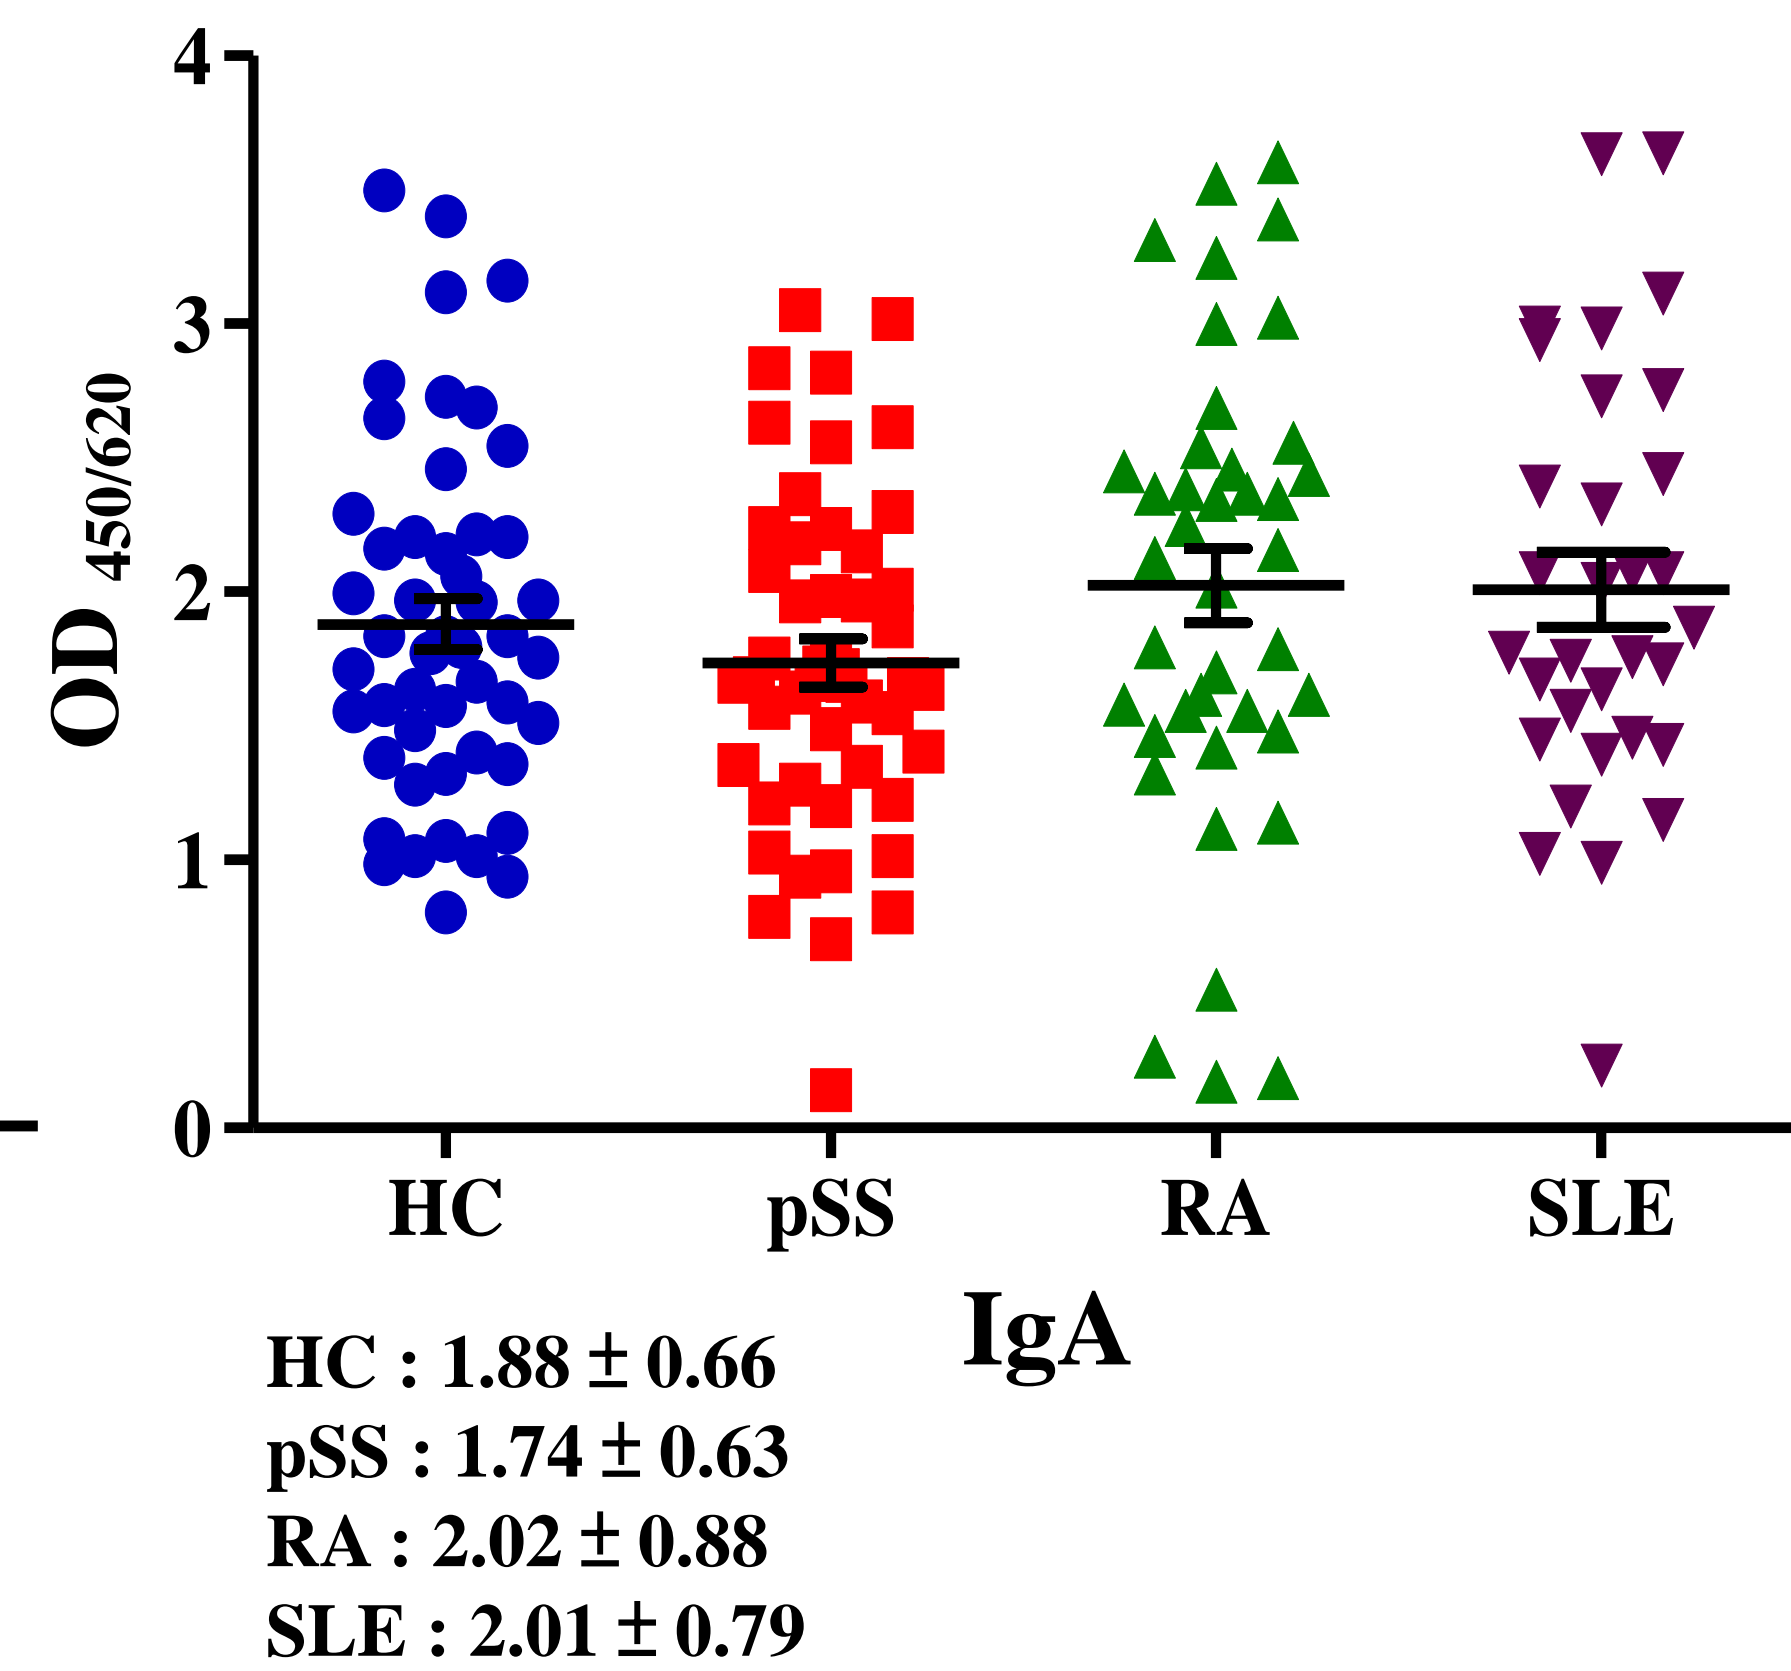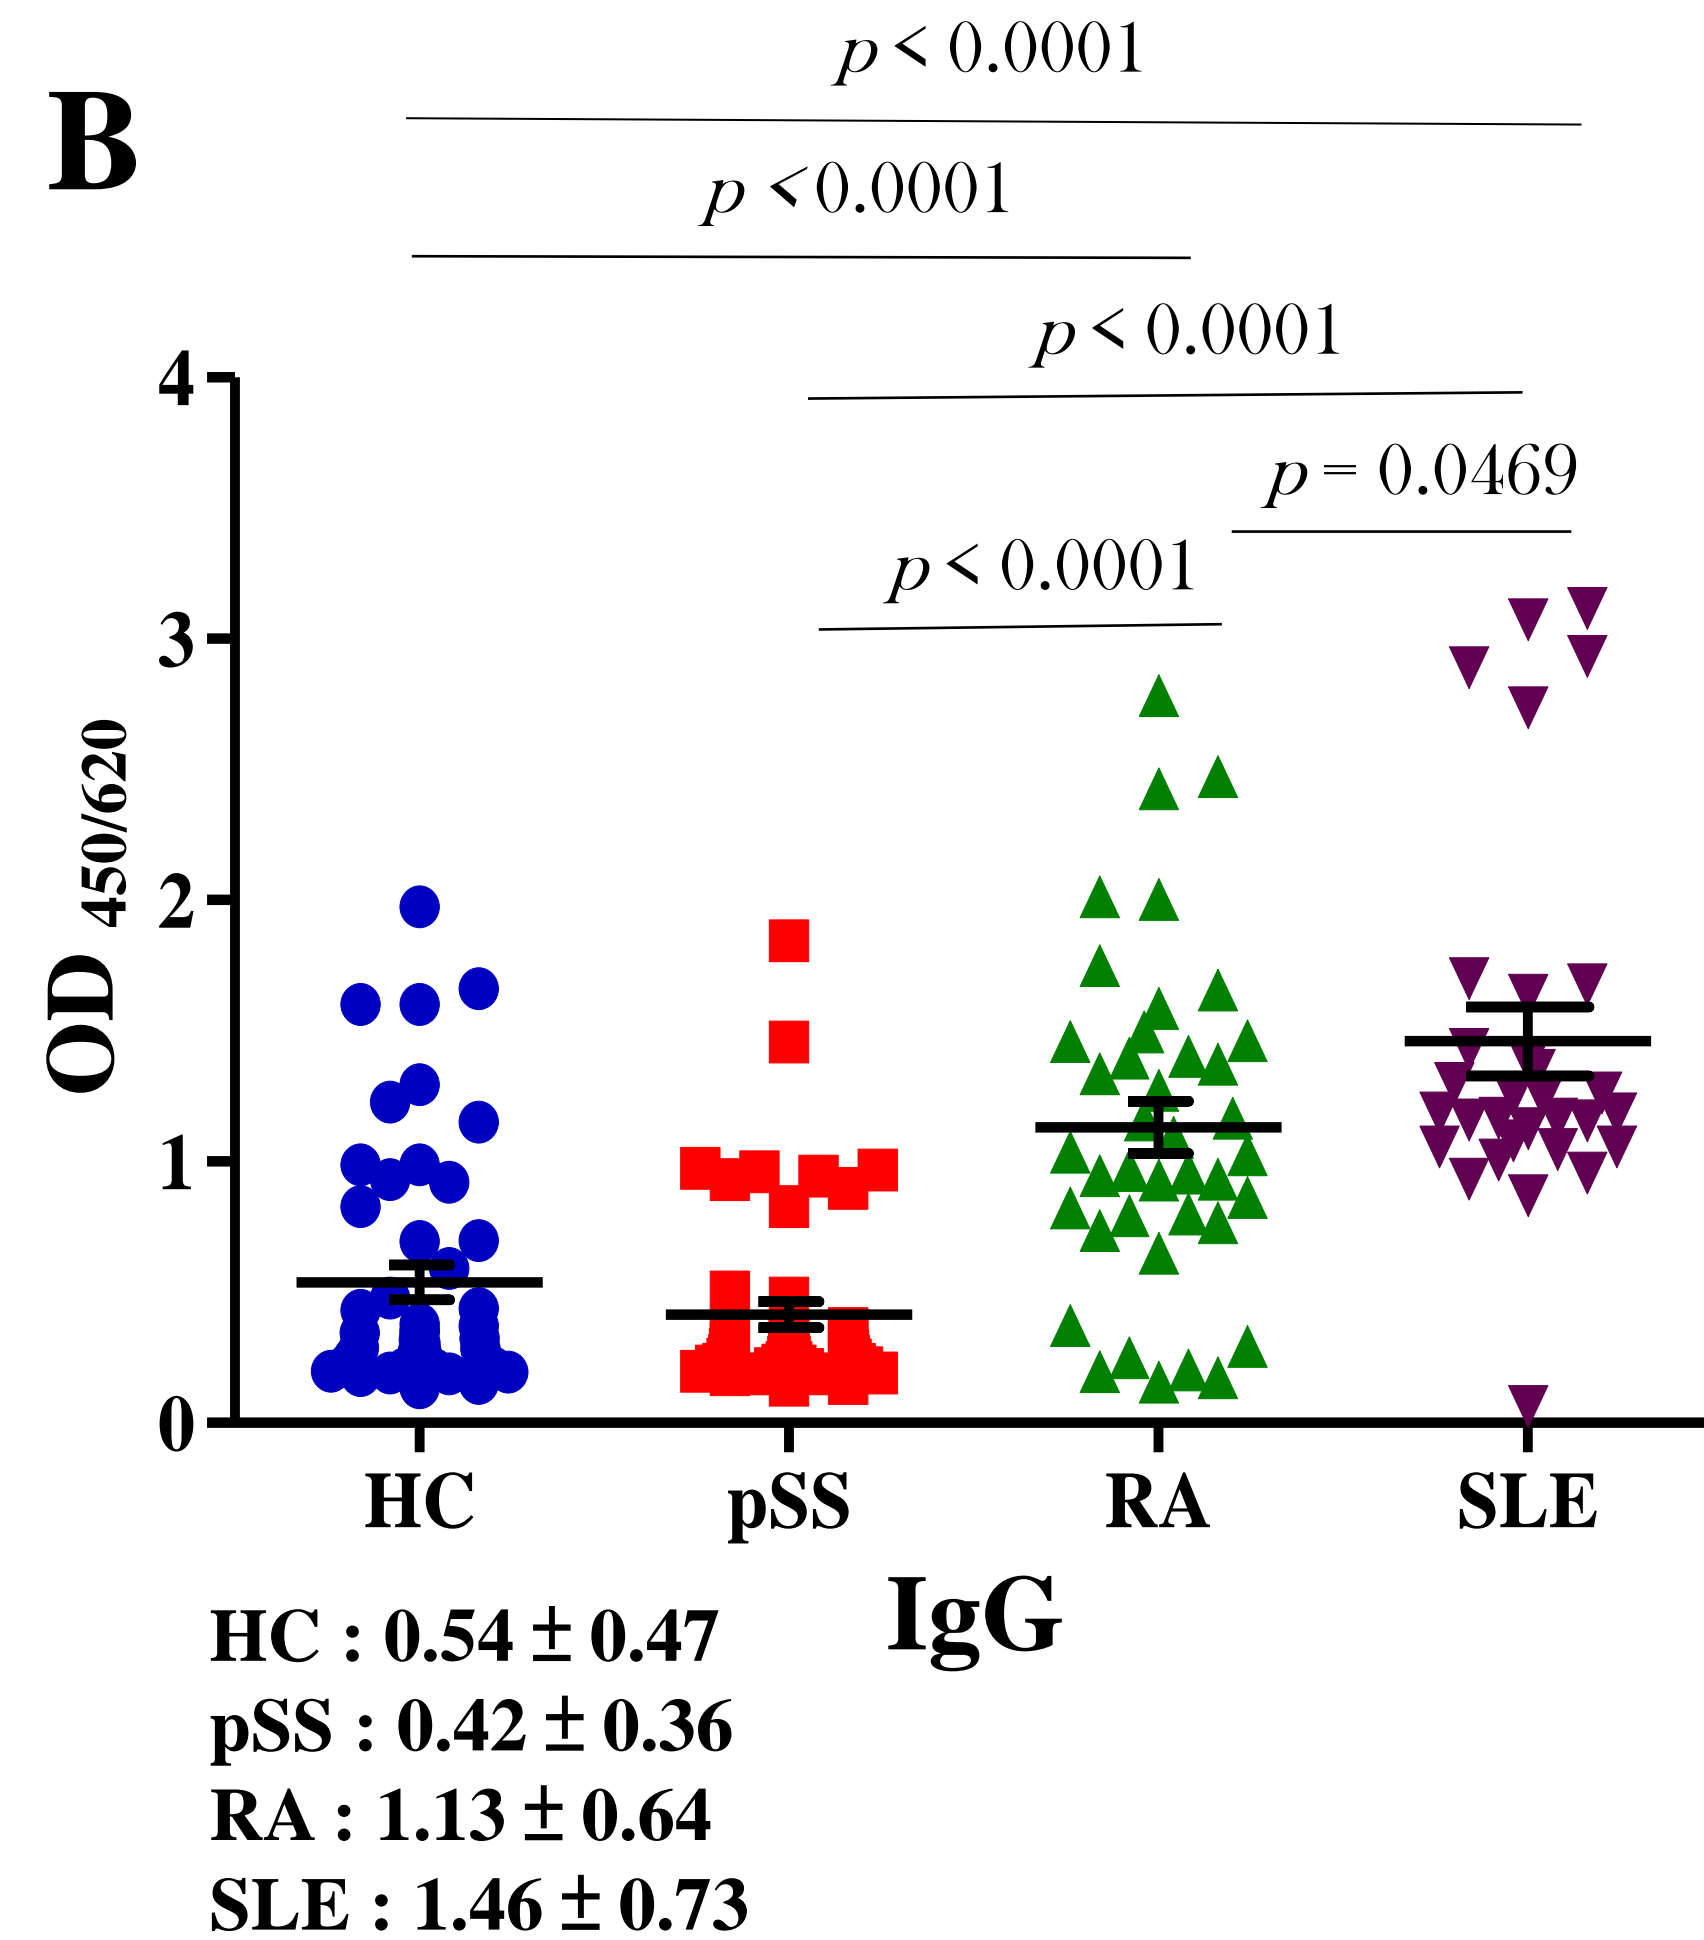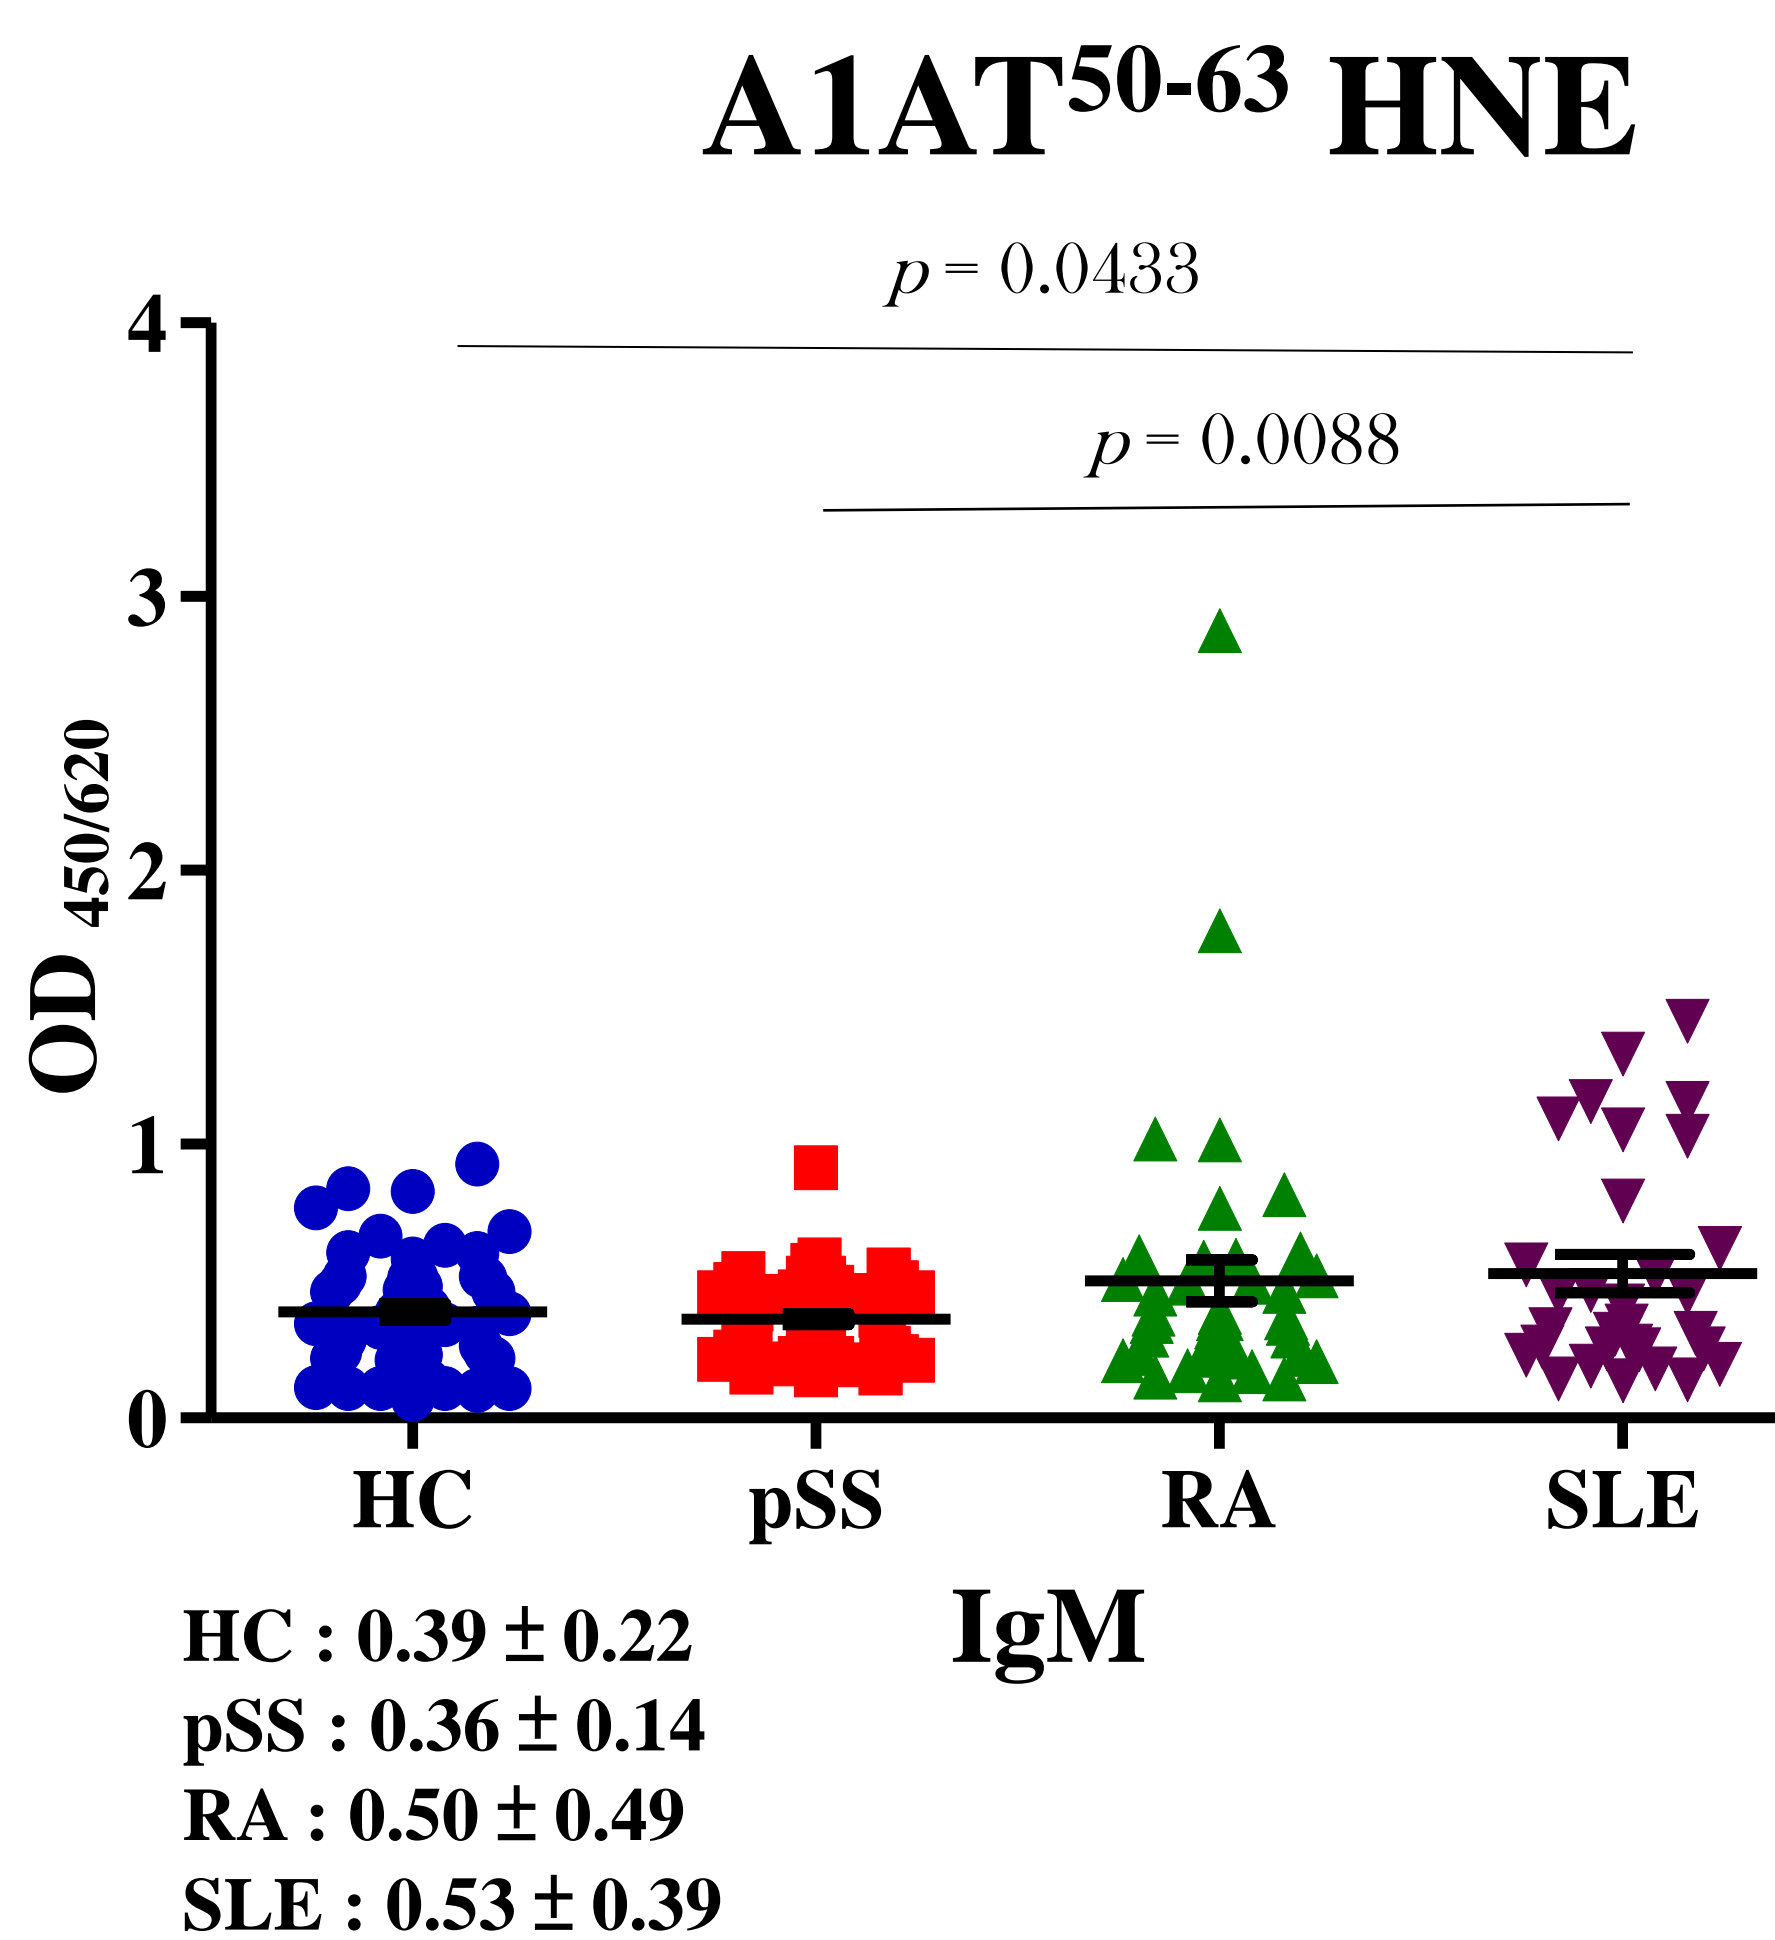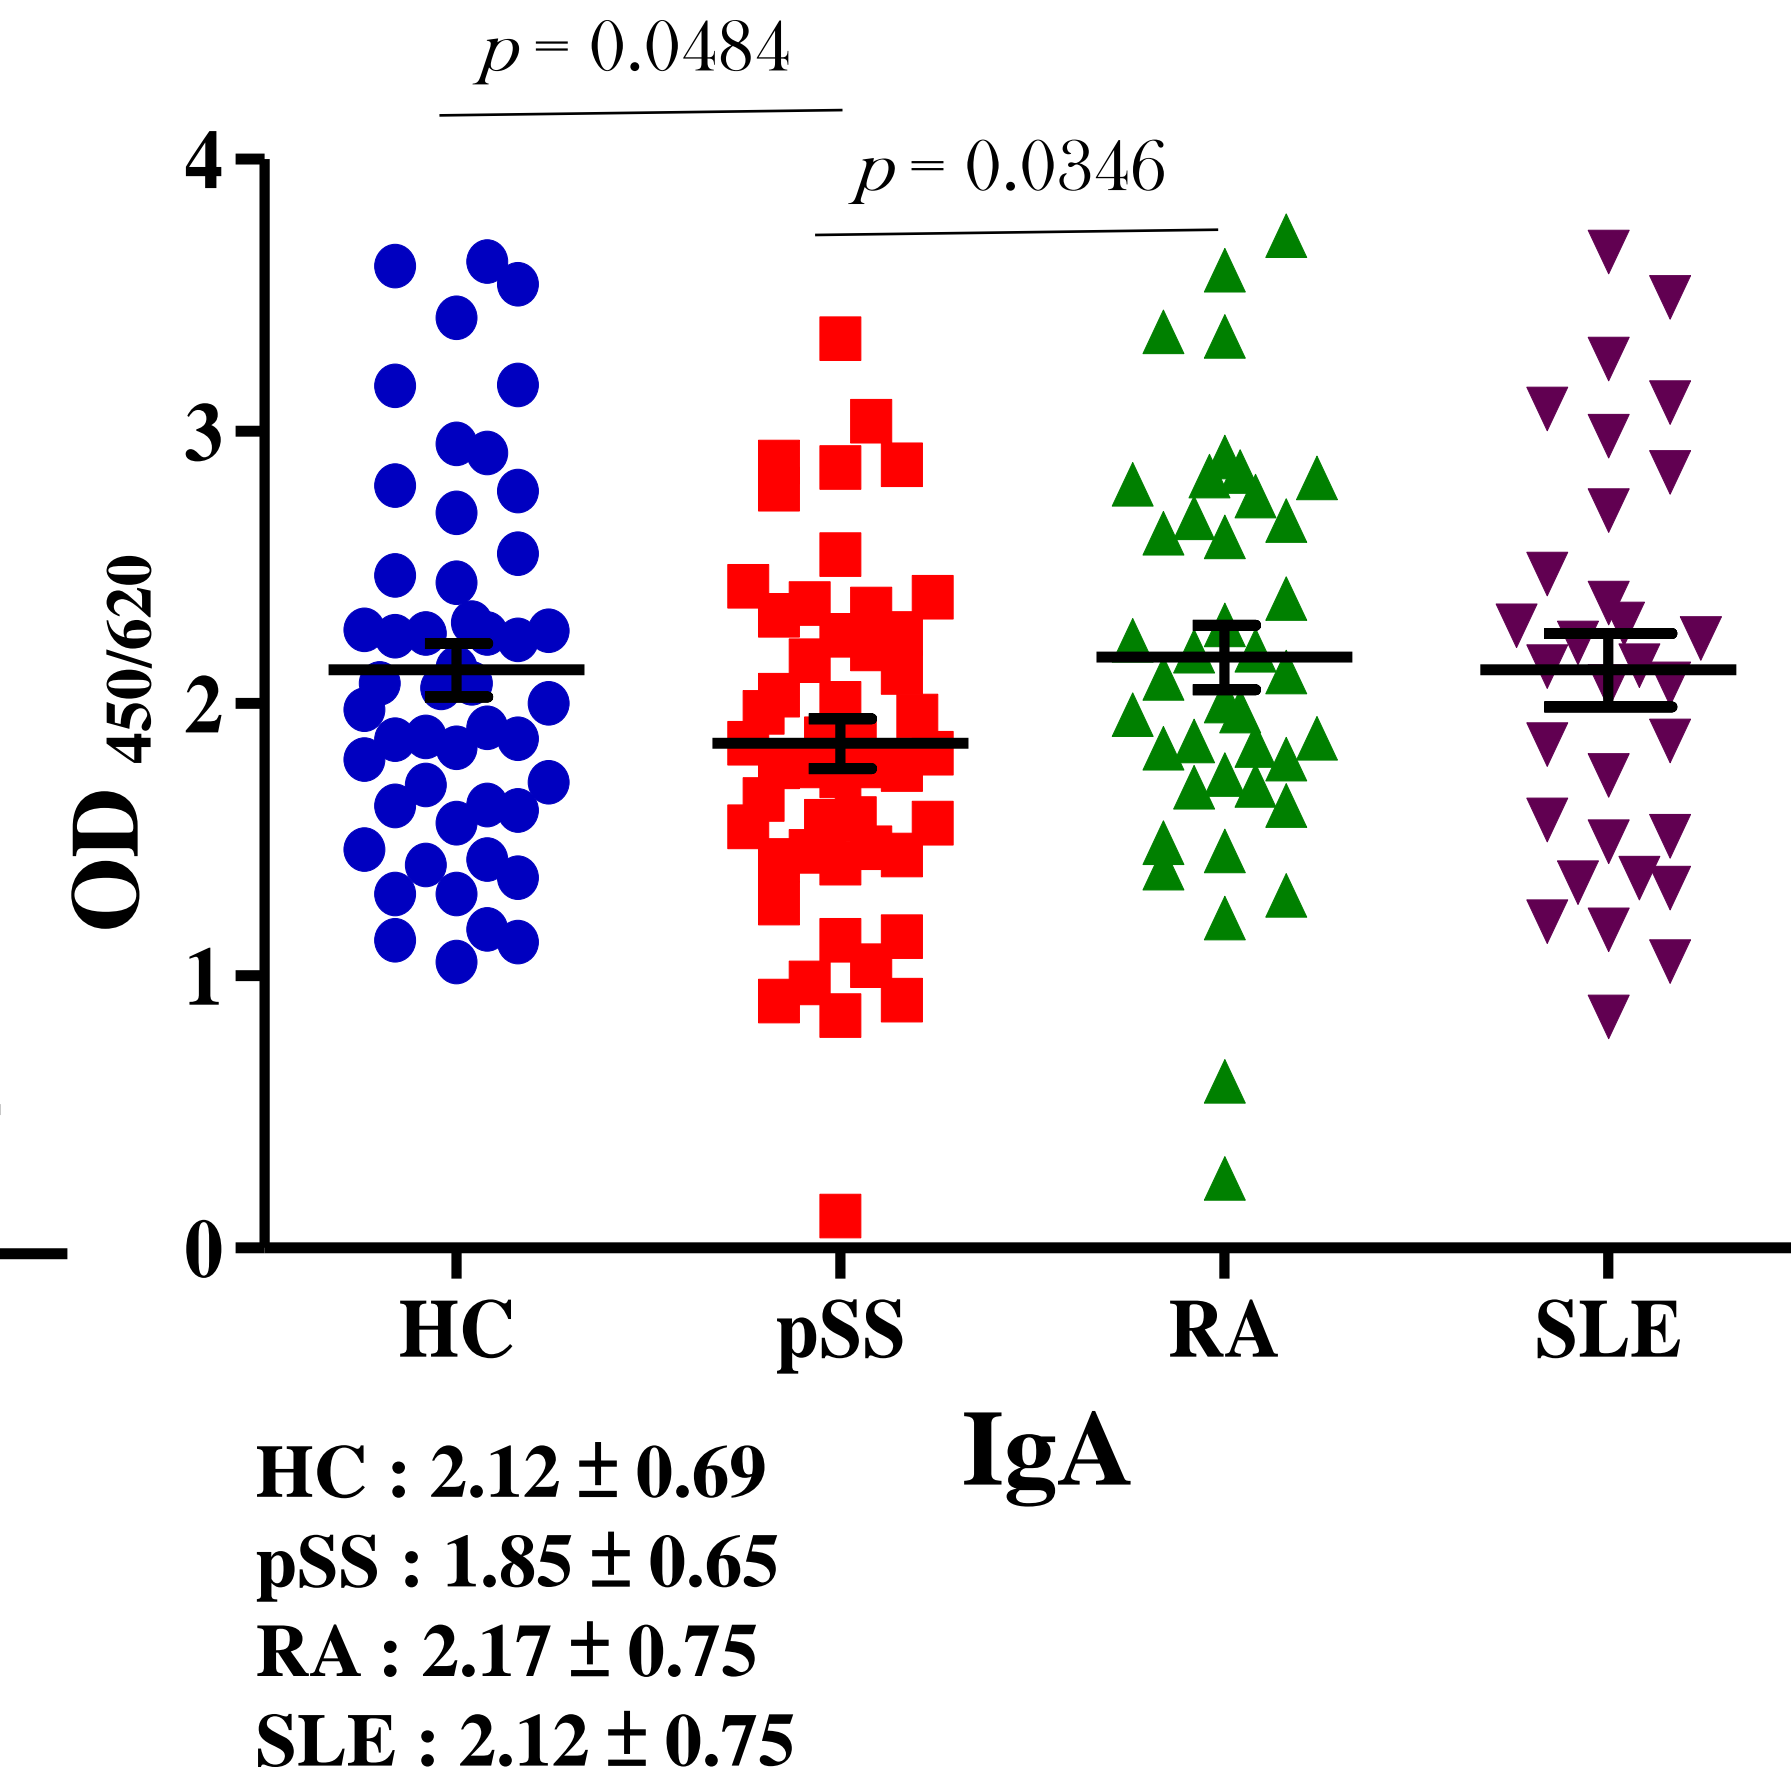

Figure 3. Dot plot of serum concentrations (absorbance units at 450/620 nm) of IgG, IgM, and IgA autoantibody isotypes recognizing A1AT<sup>50-63</sup> (A) and A1AT<sup>50-63</sup> 4-hydroxy-2-nonenal (HNE) (B) in healthy controls (HCs), patients with primary Sjögren's syndrome (pSS), rheumatoid arthritis (RA), and systemic lupus erythematosus (SLE) with an ELISA. OD<sub>450/620</sub>, optical density at 450/620 nm.
